# Supplementary material for: Asymmetric construction of spirobenzofuran indolinones via a cascade reaction of 3-hydroxyoxindoles with coumarins
Source: Royal Society of Chemistry journal article supplement (doi:10.1039/d4qo01471e), 2024-01-01
Supplement: d4qo01471e1.pdf [file d4qo01471e1.pdf]

**Asymmetric construction of spirobenzofuran indolinones via  
cascade reaction of 3-hydroxyoxindoles with coumarins**

Yanji Song, Yuqiao Zhou, Zheng Tan, Ziliang Jiao, Xiaoming Feng and Xiaohua Liu\*

*Key Laboratory of Green Chemistry & Technology, Ministry of Education, College of  
Chemistry, Sichuan University, Chengdu 610064, P. R. China.*

E-mail: liuxh@scu.edu.cn

## Table of Contents

|                                                                                                  |     |
|--------------------------------------------------------------------------------------------------|-----|
| 1. General Information .....                                                                     | 3   |
| 2. Synthesis of starting materials .....                                                         | 4   |
| 3. Optimization of reaction conditions. ....                                                     | 8   |
| 4. Typical procedure for the catalytic asymmetric reaction.....                                  | 12  |
| 5. Unsuccessful substrates. ....                                                                 | 14  |
| 6. X-ray crystal data. ....                                                                      | 14  |
| 7. Control experiments and mechanistic studies .....                                             | 19  |
| 8. Spectral characterization data for products.....                                              | 22  |
| 9. Copies of $^1\text{H}$ , $^{13}\text{C}$ and $^{19}\text{F}$ NMR spectra of the products..... | 94  |
| 10. Reference. ....                                                                              | 192 |

## 1. General Information

Unless otherwise noted, all catalytic reactions were run under nitrogen conditions, column chromatography was generally performed on silica gel (300–400 mesh) and reactions were monitored with thin layer chromatography (TLC) using 254 nm UV light. NMR characterization data were collected on Bruker ASCEND™ operating at 400 MHz for  $^1\text{H}$  NMR, 101 MHz for  $^{13}\text{C}\{^1\text{H}\}$  NMR (with complete proton decoupling), and 376 MHz for  $^{19}\text{F}\{^1\text{H}\}$  NMR (with complete proton decoupling).  $^1\text{H}$  NMR chemical shifts were reported in ppm from tetramethylsilane with the TMS resonance as the internal standard ( $\delta = 0.00$ ).  $^{13}\text{C}$  NMR spectra chemical shifts are reported in ppm from tetramethylsilane with the solvent resonance as internal standard ( $\text{CDCl}_3$ ,  $\delta = 77.16$ ,  $(\text{CD}_3)_2\text{CO}$ ,  $\delta = 206.4$ ). Spectra were reported as follows: chemical shift ( $\delta$  ppm), multiplicity (s = singlet, d = doublet, t = triplet, q = quartet, m = multiplet), coupling constants (Hz), integration and assignment. High-resolution mass spectra (HRMS) were recorded on a Thermo Q-Exactive Focus (FTMS+c ESI). Enantiomeric excesses were determined by chiral SFC analysis using the corresponding commercial chiral column as stated in the experimental procedures at 35 °C with UV detector. Optical rotations were measured on Rudolph Research Analytic Automatic Polarimeter and reported as follows:  $[\alpha]_{\text{D}}^{\text{T}}$  (c: g/100 mL, in  $\text{CH}_2\text{Cl}_2$ ). Infrared spectra (IR) were recorded on Bruker Tensor II spectrometer with Plantium ATR accessory and the peaks are reported as absorption maxima ( $\nu$ ,  $\text{cm}^{-1}$ ). Melting point ranges were determined on OptiMelt. X-ray crystallographic data were collected by a Bruker D8 Venture Photon II. Ester solvents obtained from commercial sources were used without further purification. THF (tetrahydrofuran),  $\text{CH}_2\text{Cl}_2$  (dichloromethane), toluene were purified by usual methods before use and reagents obtained from commercial sources were used without further purification. Substrates 3-hydroxyoxindoles<sup>1</sup>, 3-acyl-2*H*-chromenones<sup>2</sup> were synthesized according to the literature methods after modified.

## 2. Synthesis of starting materials.

a) General procedure for the synthesis of chiral guanidines<sup>3,4</sup>.

Scheme S1. Chiral guanidines were used in the manuscript.

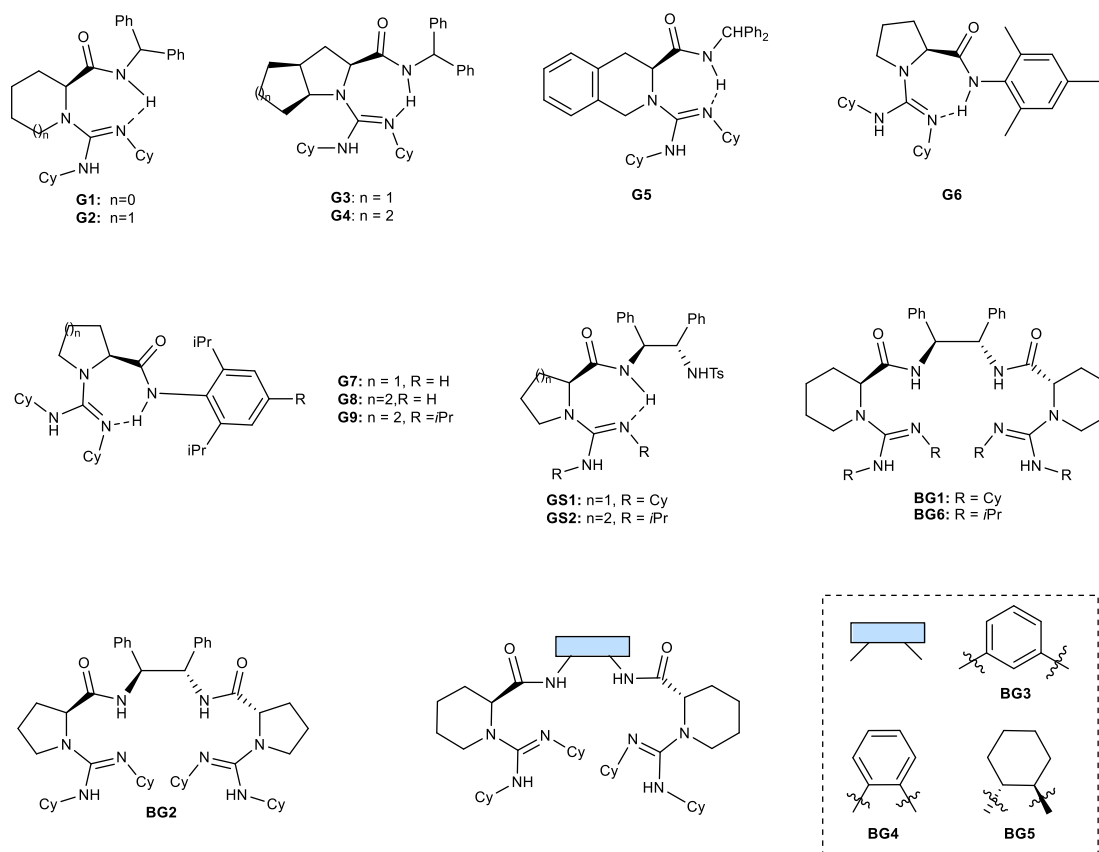

b) Typical procedure for the synthesis of 3-hydroxyoxindoles **A**.

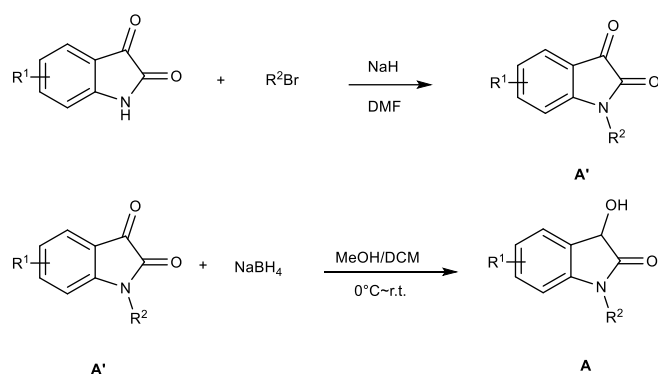

Isatin was dissolved in DMF (1 M solution), then the solution was cooled down to 0 °C and NaH (60% in petroleum, 1.05 equiv.) was added in portions. The mixture was stirred at 0 °C for 15 minutes. Then alkyl bromide or allyl bromide (1.05 equiv.) was added dropwise to this mixture. The reaction was then allowed to stir for 15 minutes at 0 °C and 12 h at r.t., after which it was carefully quenched with water at 0 °C. The solution was extracted three times with CH<sub>2</sub>Cl<sub>2</sub>. The combined extracts were washed with brine, dried over Na<sub>2</sub>SO<sub>4</sub>, filtered and concentrated in vacuo. The crude product was purified by flash-column chromatography on silica gel (eluent: petroleum ether/ethyl acetate = 5:1) gave **A'**.

The obtained product **A'** was dissolved in MeOH/DCM (v/v=2/1) at 0 °C (0.5 M solution). Sodium borohydride (1.3 equiv.) was added in portions. The solution was stirred for 20 minutes. The reaction was quenched with the addition of water (2 mL for each mmol of isatin employed) and extracted three times with DCM, dried over Na<sub>2</sub>SO<sub>4</sub>, filtered and concentrated in vacuo. The crude product was purified by flash-column chromatography on silica gel (eluent: petroleum ether/ethyl acetate = 2:1) gave **A**.

c) Typical procedure for the synthesis of 3-acyl-2*H*-chromenones **B**.

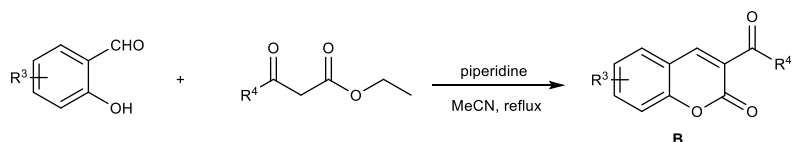

To a dry 100 mL flask were added substituted salicylaldehyde, ethyl substituted benzoyl (acetyl) acetates (1.0 equiv.), piperidine (0.13 equiv.), and acetonitrile (0.5 M). The solution was stirred under reflux for 4-12 h until the reaction completed (monitored by TLC). The mixture was filtered and recrystallized with anhydrous ethanol or crude product was purified by flash-column chromatography on silica gel. The product 3-acyl-2*H*-chromenones was obtained.

**Typical procedure for the synthesis of 3-acyl-2*H*-chromenones B26-B29:**

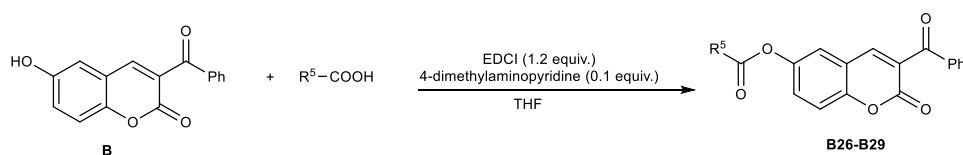

To a dry 100 mL flask were added appropriate carboxylic acid (5.0 mmol, 1.0 equiv.), EDC hydrochloride (1.15 g, 6.0 mmol, 1.2 equiv.), 4-dimethylaminopyridine (0.5 mmol, 0.1 equiv.), 3-acyl-2*H*-chromenones **B** (5.0 mmol, 1.0 equiv.) and THF (10 mL), then mixture stirred at r.t. for 12 h (monitored by TLC). The mixture was diluted with CH<sub>2</sub>Cl<sub>2</sub> (10 mL), washed with H<sub>2</sub>O (20 mL), saturated NaCl solution in sequence and dried by anhydrous Na<sub>2</sub>SO<sub>4</sub>. The solvent was evaporated under reduced pressure after filtration. The residue was purified by column chromatography on silica gel (petroleum ether/ethyl acetate = 3/1-2/1) to give pure product **B26-B29**.

**3-benzoyl-2-oxo-2*H*-chromen-6-yl 2-(1-(4-chlorobenzoyl)-5-methoxy-2-methyl-1*H*-indol-3-yl)acetate (B26)**

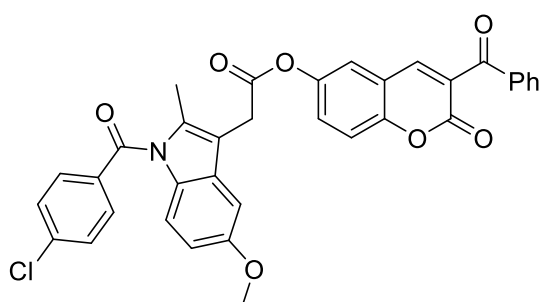

Yellow solid, 92% yield.

<sup>1</sup>H NMR (400 MHz, Chloroform-*d*) δ 7.97 (s, 1H), 7.90 – 7.82 (m, 2H), 7.71 – 7.65 (m, 2H), 7.65 – 7.59 (m, 1H), 7.52 – 7.45 (m, 4H), 7.42 – 7.37 (m, 1H), 7.34 – 7.31 (m, 2H), 7.04 (d, *J* = 2.5 Hz, 1H), 6.87 (d, *J* = 9.0 Hz, 1H), 6.70 (dd, *J* = 9.0, 2.5 Hz, 1H), 3.94 (s, 2H), 3.84 (s, 3H), 2.48 (s, 3H).

<sup>13</sup>C NMR (101 MHz, Chloroform-*d*) δ 191.4, 169.3, 168.4, 158.1, 156.3, 152.3, 147.1, 144.5, 139.7, 136.6, 136.1, 134.1, 133.8, 131.4, 131.0, 130.5, 129.7, 129.3, 128.8, 127.9, 121.2, 118.6, 118.1, 115.2, 111.8, 111.5, 101.4, 55.9, 30.6, 13.5.

HRMS (ESI) *m/z*: [M + Na]<sup>+</sup> Calculated for [C<sub>35</sub>H<sub>24</sub><sup>35</sup>ClNO<sub>7</sub>Na<sup>+</sup>]: 628.1134 found 628.1133.

HRMS (ESI) *m/z*: [M + Na]<sup>+</sup> Calculated for [C<sub>35</sub>H<sub>24</sub><sup>37</sup>ClNO<sub>7</sub>Na<sup>+</sup>]: 630.1104 found 630.1110.

IR (neat) 3062, 2930, 1736, 1676, 1573, 1480, 1399, 1319, 1236, 1152, 1121, 924, 835, 732 cm<sup>-1</sup>.

**3-benzoyl-2-oxo-2*H*-chromen-6-yl 2-(4-(4-chlorobenzoyl)phenoxy)-2-methylpropanoate (B27)**

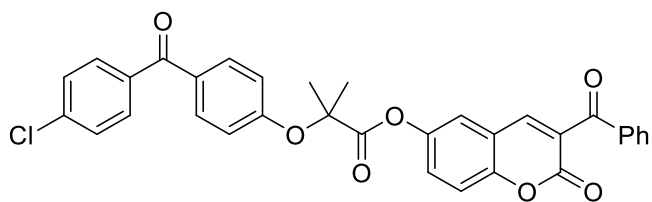

White solid, 70% yield.

<sup>1</sup>H NMR (400 MHz, Chloroform-*d*) δ 7.98 (s, 1H), 7.90 – 7.84 (m, 2H), 7.83 – 7.77 (m, 2H), 7.75 – 7.68 (m, 2H), 7.66 – 7.60 (m, 1H), 7.53 – 7.38 (m, 5H), 7.27 – 7.23 (m, 2H), 7.03 – 6.96

(m, 2H), 1.85 (s, 6H).

<sup>13</sup>C NMR (101 MHz, Chloroform-*d*) δ 194.3, 191.3, 172.5, 159.4, 158.0, 152.5, 146.8, 144.3, 138.8, 136.3, 136.0, 134.2, 132.3, 131.3, 131.1, 129.7, 128.8, 128.8, 128.1, 126.7, 121.0, 118.7, 118.3, 117.4, 79.5, 25.6.

HRMS (ESI) *m/z*: [M + Na]<sup>+</sup> Calculated for [C<sub>33</sub>H<sub>23</sub><sup>35</sup>ClNO<sub>7</sub>Na<sup>+</sup>]: 589.1025 found 589.1031.

HRMS (ESI) *m/z*: [M + Na]<sup>+</sup> Calculated for [C<sub>33</sub>H<sub>23</sub><sup>37</sup>ClNO<sub>7</sub>Na<sup>+</sup>]: 591.0995 found 591.1014.

IR (neat) 3062, 1731, 1657, 1595, 1278, 1240, 1148, 1100, 925, 854, 733 cm<sup>-1</sup>.

**3-benzoyl-2-oxo-2*H*-chromen-6-yl 2-((2,3-dimethylphenyl)amino)benzoate (B28)**

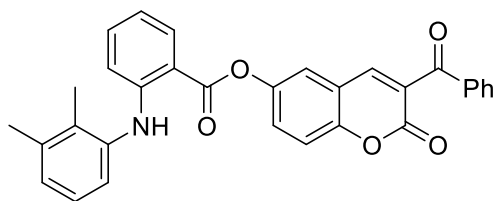

White solid, 69% yield.

**<sup>1</sup>H NMR** (400 MHz, Chloroform-*d*) δ 9.09 (s, 1H), 8.18 (dd, *J* = 8.1, 1.5 Hz, 1H), 8.05 (s, 1H), 7.89 (dd, *J* = 8.2, 1.1 Hz, 2H), 7.67 – 7.59 (m, 1H), 7.55 – 7.45 (m, 5H), 7.36 – 7.32 (m, 1H), 7.19 – 7.09 (m, 2H),

7.05 (d, *J* = 6.9 Hz, 1H), 6.82 – 6.72 (m, 2H), 2.33 (s, 3H), 2.16 (s, 3H).

**<sup>13</sup>C NMR** (101 MHz, Chloroform-*d*) δ 191.5, 167.2, 158.3, 152.4, 150.7, 147.3, 144.7, 138.5, 138.2, 136.2, 135.6, 134.1, 132.8, 131.9, 129.8, 128.8, 127.9, 127.8, 127.5, 126.2, 123.6, 121.8, 118.8, 118.2, 116.4, 114.1, 108.8, 20.7, 14.1.

**HRMS** (ESI) *m/z*: [M + Na]<sup>+</sup> Calculated for [C<sub>31</sub>H<sub>23</sub>NO<sub>5</sub>Na<sup>+</sup>]: 512.1468 found 512.1478.

**IR** (neat) 3339, 3064, 1735, 1697, 1573, 1508, 1453, 1217, 1152, 1041, 743, 695 cm<sup>-1</sup>.

### 3-benzoyl-2-oxo-2H-chromen-6-yl (*S*)-2-(6-methoxynaphthalen-2-yl)propanoate (B29)

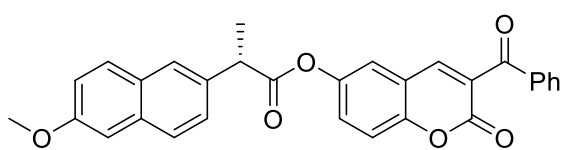

White solid, 66% yield.

**<sup>1</sup>H NMR** (400 MHz, Chloroform-*d*) δ 7.93 (s, 1H), 7.89 – 7.82 (m, 2H), 7.80 – 7.70 (m, 3H), 7.61 (t, *J* = 7.4 Hz, 1H), 7.53 – 7.43 (m, 3H),

7.35 (d, *J* = 9.5 Hz, 1H), 7.27 – 7.23 (m, 2H), 7.20 – 7.11 (m, 2H), 4.12 (q, *J* = 7.1 Hz, 1H), 3.92 (s, 3H), 1.71 (d, *J* = 7.1 Hz, 3H).

**<sup>13</sup>C NMR** (101 MHz, Chloroform-*d*) δ 191.4, 173.2, 158.2, 158.0, 152.2, 147.3, 144.6, 136.1, 134.7, 134.1, 129.7, 129.4, 129.1, 128.8, 127.7, 127.7, 127.2, 126.3, 126.0, 121.2, 119.5, 118.6, 118.0, 105.7, 55.5, 45.6, 18.5.

**HRMS** (ESI) *m/z*: [M + Na]<sup>+</sup> Calculated for [C<sub>30</sub>H<sub>22</sub>O<sub>6</sub>Na<sup>+</sup>]: 501.1309 found 501.1318.

**IR** (neat) 3059, 2935, 1741, 1665, 1605, 1571, 1485, 1238, 1145, 1070, 733, 696 cm<sup>-1</sup>.

### 3. Optimization of reaction conditions.

Table S1. Screening of the chiral guanidines <sup>[a]</sup>.

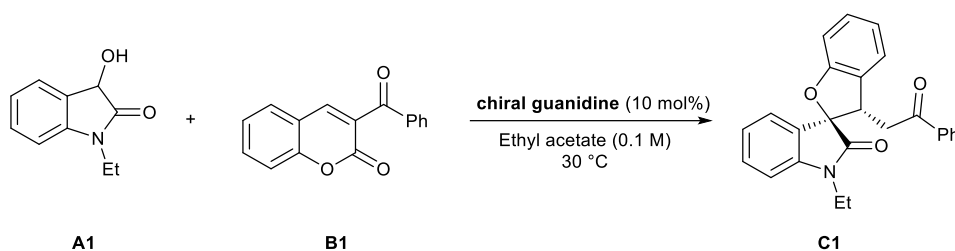

| Entry <sup>[a]</sup> | chiral guanidine | Yield (%) <sup>[b]</sup> | er <sup>[c]</sup> | dr <sup>[c]</sup> |
|----------------------|------------------|--------------------------|-------------------|-------------------|
| 1                    | <b>G1</b>        | 68                       | 42:58             | 84:16             |
| 2                    | <b>G2</b>        | 61                       | 38:62             | 80:20             |
| 3                    | <b>G3</b>        | 99                       | 46:54             | 76:24             |
| 4                    | <b>G4</b>        | 99                       | 47:53             | 77:23             |
| 5                    | <b>G5</b>        | 68                       | 44:56             | 74:26             |
| 6                    | <b>G6</b>        | 99                       | 34:66             | 76:24             |
| 7                    | <b>GS1</b>       | 81                       | 48:52             | 83:17             |
| 8                    | <b>BG1</b>       | 99                       | 54:46             | 60:40             |

[a] Unless otherwise noted, the reactions were carried out with **A1** (0.10 mmol), **B1** (0.10 mmol) and the catalyst (10 mol%) in ethyl acetate (0.1 M) at 30 °C for 12 h. [b] Yield of the isolated products. [c] Determined by chiral SFC.

Table S2. Screening of temperature<sup>[a]</sup>.

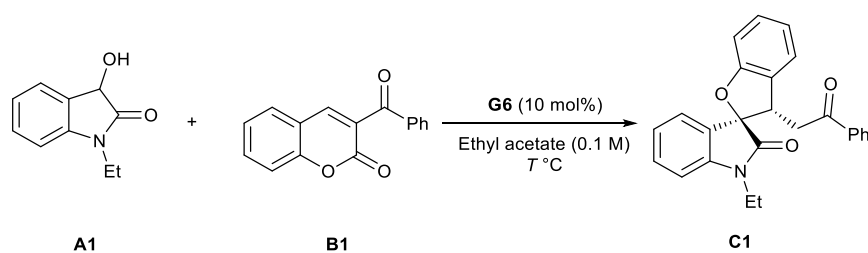

| Entry <sup>[a]</sup> | T °C | Yield (%) <sup>[b]</sup> | er <sup>[c]</sup> | dr <sup>[c]</sup> |
|----------------------|------|--------------------------|-------------------|-------------------|
| 1                    | 40   | 99                       | 35:65             | 74:26             |
| 2                    | 35   | 99                       | 35:65             | 74:26             |
| 3                    | 30   | 99                       | 34:66             | 76:24             |
| 4 <sup>[d]</sup>     | 25   | 99                       | 34:66             | 75:25             |
| 5 <sup>[d]</sup>     | 20   | 99                       | 34:66             | 75:25             |



[a] Unless otherwise noted, the reactions were carried out with **A1** (0.10 mmol), **B1** (0.10 mmol) and **G6** (10 mol%) in ethyl acetate (0.1 M) at  $T$  °C for 12 h. [b] Yield of the isolated products. [c] Determined by chiral SFC. [d] React for 4 days.

Table S3. Screening of solvents<sup>[a]</sup>.

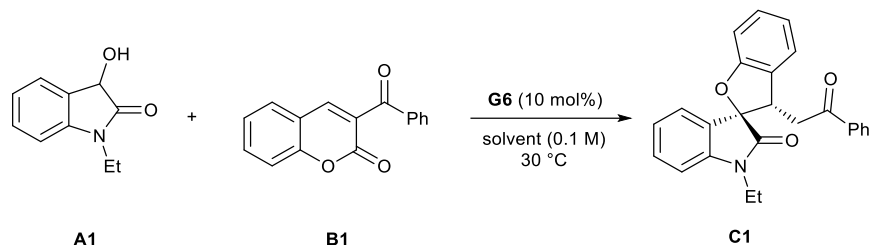

| Entry <sup>[a]</sup> | solvent                         | Yield (%) <sup>[b]</sup> | er <sup>[c]</sup> | dr <sup>[c]</sup> |
|----------------------|---------------------------------|--------------------------|-------------------|-------------------|
| 1                    | Propyl acetate                  | 99                       | 34:66             | 75:25             |
| 2                    | Isopropyl acetate               | 99                       | 34:66             | 73:27             |
| 3                    | <i>tert</i> -Butyl acetate      | 8                        | 42:58             | >19:1             |
| 4                    | Ethyl propionate                | 99                       | 36:64             | 75:25             |
| 5                    | Phenol acetate                  | 81                       | 42:58             | 77:23             |
| 6                    | CH <sub>2</sub> Cl <sub>2</sub> | 99                       | 64:36             | 58:42             |
| 7                    | Toluene                         | 99                       | 31:69             | 76:24             |
| 8                    | THF                             | 99                       | 33:67             | 74:26             |

[a] Unless otherwise noted, the reactions were carried out with **A1** (0.10 mmol), **B1** (0.10 mmol) and **G6** (10 mol%) in solvent (0.1 M) at 30 °C for 12 h. [b] Yield of the isolated products. [c] Determined by chiral SFC.

Table S4. Rescreening of the chiral guanidines<sup>[a]</sup>.

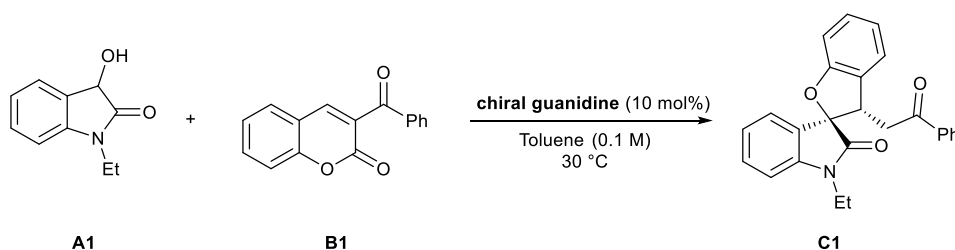

| Entry <sup>[a]</sup> | chiral guanidine              | Yield (%) <sup>[b]</sup> | er <sup>[c]</sup> | dr <sup>[c]</sup> |
|----------------------|-------------------------------|--------------------------|-------------------|-------------------|
| 1                    | <b>G7</b>                     | 31                       | 40:60             | 85:15             |
| 2                    | <b>G8</b>                     | 37                       | 42:58             | 87:13             |
| 3                    | <b>G9</b>                     | 35                       | 43:57             | 87:13             |
| 4                    | <b>BG2</b> •HBAr <sup>F</sup> | 17                       | 72:28             | >19:1             |
| 5                    | <b>BG1</b> •HBAr <sup>F</sup> | 51                       | 82:18             | 94:6              |

|                   |                               |    |       |       |
|-------------------|-------------------------------|----|-------|-------|
| 6                 | <b>GS2</b>                    | 54 | 46:54 | 83:17 |
| 7 <sup>[d]</sup>  | <b>BG2</b> •HBAr <sup>F</sup> | 50 | 75:25 | >19:1 |
| 8 <sup>[d]</sup>  | <b>BG1</b> •HBAr <sup>F</sup> | 99 | 85:15 | >19:1 |
| 9 <sup>[d]</sup>  | <b>BG3</b> •HBAr <sup>F</sup> | 66 | 42:58 | 76:24 |
| 10 <sup>[d]</sup> | <b>BG4</b> •HBAr <sup>F</sup> | 28 | 58:42 | >19:1 |
| 11 <sup>[d]</sup> | <b>BG5</b> •HBAr <sup>F</sup> | 99 | 47:53 | 47:53 |
| 12 <sup>[d]</sup> | <b>BG6</b> •HBAr <sup>F</sup> | 99 | 86:14 | 19:1  |

[a] Unless otherwise noted, the reactions were carried out with **A1** (0.10 mmol), **B1** (0.10 mmol) and chiral guanidine (10 mol%) in toluene (0.1 M) at 30 °C for 12 h. [b] Yield of the isolated products. [c] Determined by chiral SFC. [d] React for 3 days.

Table S5. Screening of the additives<sup>[a]</sup>.

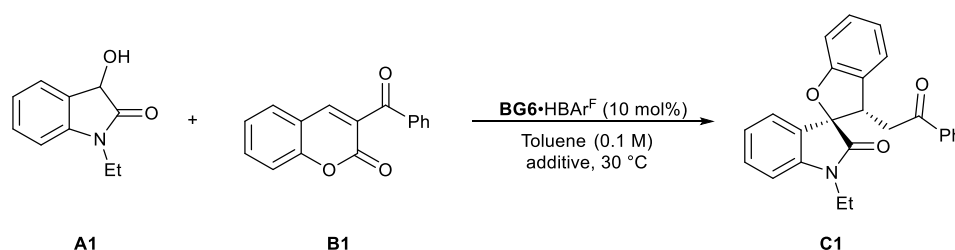

| Entry <sup>[a]</sup> | additives      | Yield (%) <sup>[b]</sup> | er <sup>[c]</sup> | dr <sup>[c]</sup> |
|----------------------|----------------|--------------------------|-------------------|-------------------|
| 1                    | 3 Å MS (20 mg) | 89                       | 88:12             | >19:1             |
| 2                    | 4 Å MS (20 mg) | 99                       | 87:13             | >19:1             |
| 3                    | 5 Å MS (20 mg) | 90                       | 88:12             | 19:1              |
| 4                    | no additive    | 99                       | 86:14             | 19:1              |

[a] Unless otherwise noted, the reactions were carried out with **A1** (0.10 mmol), **B1** (0.10 mmol), additives and **BG6**•HBAr<sup>F</sup> (10 mol%) in toluene (0.1 M) at 30 °C for 48 h. [b] Yield of the isolated products. [c] Determined by chiral SFC.

Table S6. Screening of the substrate ratio<sup>[a]</sup>.

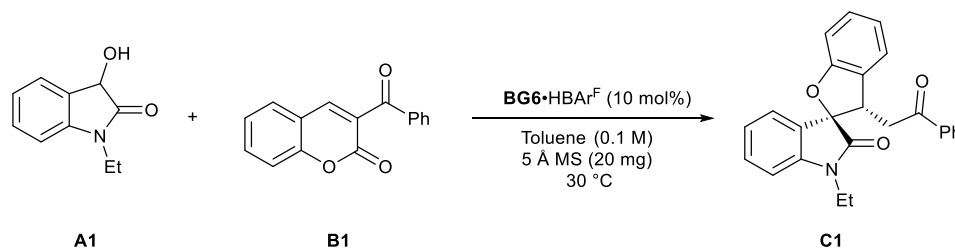

| Entry <sup>[a]</sup> | <b>A1/B1</b> | Yield (%) <sup>[b]</sup> | er <sup>[c]</sup> | dr <sup>[c]</sup> |
|----------------------|--------------|--------------------------|-------------------|-------------------|
| 1                    | 1.1/1        | 90                       | 87:13             | 94:6              |

|                   |       |    |       |       |
|-------------------|-------|----|-------|-------|
| 2                 | 1.2/1 | 91 | 87:13 | 19:1  |
| 3                 | 1.5/1 | 99 | 87:13 | >19:1 |
| 4                 | 1/1.1 | 88 | 88:12 | 94:6  |
| 5                 | 1/1.2 | 80 | 88:12 | 94:6  |
| 6                 | 1/1.3 | 75 | 88:12 | 19:1  |
| 7 <sup>[d]</sup>  | 1.5/1 | 59 | 96:4  | >19:1 |
| 8 <sup>[e]</sup>  | 1.5/1 | 94 | 95:5  | >19:1 |
| 9 <sup>[f]</sup>  | 1.5/1 | 57 | 93:7  | >19:1 |
| 10 <sup>[g]</sup> | 1.5/1 | 33 | 94:6  | >19:1 |

[a] Unless otherwise noted, the reactions were carried out with **A1**, **B1**, 20mg 5 Å MS and **BG6**•HBAr<sup>F</sup> (10 mol%) in toluene (0.1 M) at 30 °C for 48 h. [b] Yield of the isolated products. [c] Determined by chiral SFC. [d] 1.0 mL THF were used. [e] 1.0 mL isopropyl acetate were used. [f] 1.0 mL isopropyl acetate and 5 mol% **BG6**•HBAr<sup>F</sup> were used. [g] 1.0 mL isopropyl acetate and 2.5 mol% **BG6**•HBAr<sup>F</sup> were used.

## 4. Typical procedure for the catalytic asymmetric reaction.

### 4.1 General procedure for the catalytic asymmetric reaction.

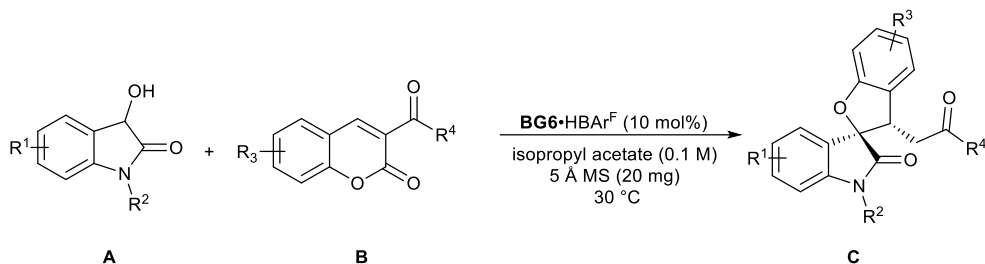

An oven-dried test tube was charged with **A** (0.15 mmol), **B** (0.10 mmol), **BG6**·**HBAr<sup>F</sup>** (10 mol%), 5 Å MS (20 mg), extract and replace nitrogen three times, and isopropyl acetate (1.0 mL) was added under nitrogen atmosphere, the reaction mixture was stirred at 30 °C and detected by TLC. After the reaction was completed, the residue was subjected to column chromatography (silica gel, eluent: petroleum ether/ethyl acetate = 5:1 to 3:1) to afford the desired products.

### 4.2 General procedure for the preparation of the racemic products.

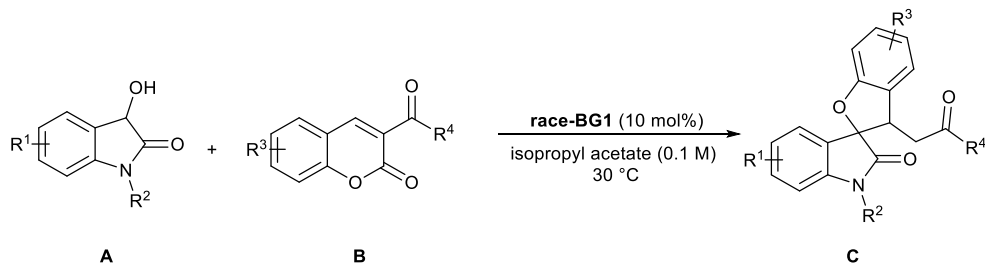

**Method 1:** An oven-dried test tube was charged with **A** (0.15 mmol), **B** (0.10 mmol), **race-BG1** (10 mol%), extract and replace nitrogen three times, and isopropyl acetate (1.0 mL) was added under nitrogen atmosphere, the reaction mixture was stirred at 30 °C and detected by TLC. After the reaction was completed, the residue was subjected to column chromatography (silica gel, eluent: petroleum ether/ethyl acetate = 5:1 to 3:1) to afford the desired products.

**Method 2:** An oven-dried test tube was charged with **A** (0.15 mmol), **B** (0.10 mmol), **DBN** (20 mol%), isopropyl acetate (1.0 mL) was added, the reaction mixture was stirred at 60 °C and detected by TLC. After the reaction was completed, the residue was subjected to column chromatography (silica gel, eluent: petroleum ether/ethyl acetate = 5:1 to 3:1) to afford the desired products (For racemic product **C1**, **C2**, **C5**, **C7**, **C8**, **C9**, **C10**, **C13**, **C14**, **C16**, **C17**, **C18**, **C19**, **C22**, **C26**, **C29**, **C30**, **C31**, **C33**, **C34**, **C35**, **C36**, **C37**, **C41**, **C44**).

Note: the diastereomers could be separated by silica gel column chromatography.

### 4.3 Experimental procedure for the gram-scale reaction.

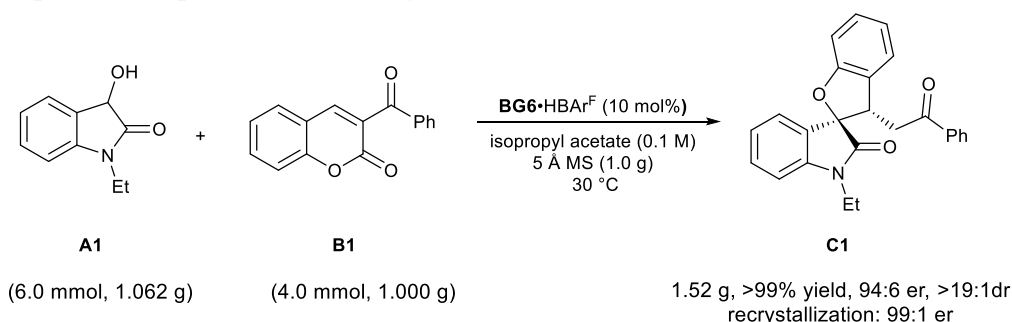

An oven-dried round-bottom flask was charged with **A1** (6.0 mmol), **B1** (4.0 mmol), **BG6**·HBAr<sup>F</sup> (0.4 mmol, 10 mol%), 5 Å MS (1.0 g), extract and replace nitrogen three times, and isopropyl acetate (40 mL) was added under nitrogen atmosphere, the reaction mixture was stirred at 30 °C and detected by TLC. After the reaction was completed, remove the solvent by the vacuum evaporator, the residue was subjected to column chromatography (silica gel, eluent: petroleum ether/ethyl acetate = 5:1 to 3:1) to afford the desired product.

#### 4.4 Experimental procedure for further transformation.

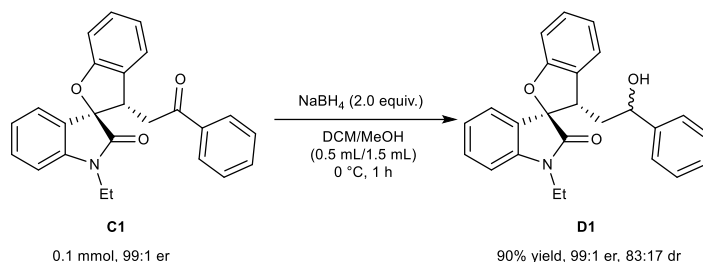

To an oven-dried reaction tube was added **C1** (38.3 mg, 0.10 mmol), DCM (0.5 mL) and MeOH (1.5 mL), then NaBH<sub>4</sub> (7.5 mg, 0.20 mmol) was added at 0 °C (ice bath), the mixture was stirred for 1 h at 0 °C. After finished, the reaction was quenched with NH<sub>4</sub>Cl (5 mL). The solution was extracted with CH<sub>2</sub>Cl<sub>2</sub> (3×5 mL). The combined extracts were washed with brine (8.0 mL), dried (Na<sub>2</sub>SO<sub>4</sub>), filtered and concentrated in vacuo. The crude product was purified by flash-column chromatography on silica gel (eluent: petroleum ether/ethyl acetate = 2:1) gave **D1** (34.8 mg, 90% yield, 99:1 er, 83:17 dr).

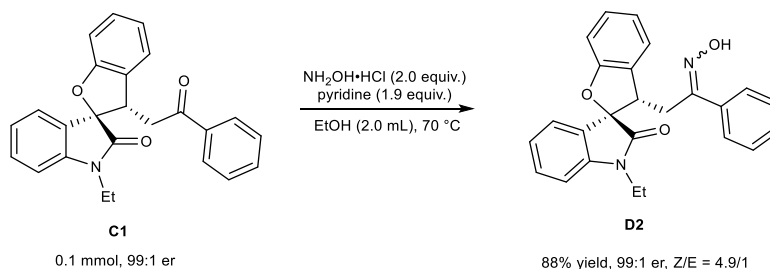

To an oven-dried reaction tube were added NH<sub>2</sub>OH·HCl (13.9 mg, 0.2 mmol), pyridine (16 μL, 0.19 mmol) and EtOH (1.5 mL), the mixture was stirred at 70 °C for 1 h, then **C1** (38.3 mg, 0.1 mmol) and EtOH (0.5 mL) was added, the mixture was stirred for another 8 h. Concentration of EtOH in vacuo and the residue was purified by flash column chromatography on silica gel (eluent: petroleum ether/ethyl acetate = 3/1) to afford product **D2**. (35.0 mg, 88% yield, 99:1 er, Z/E = 4.9/1).

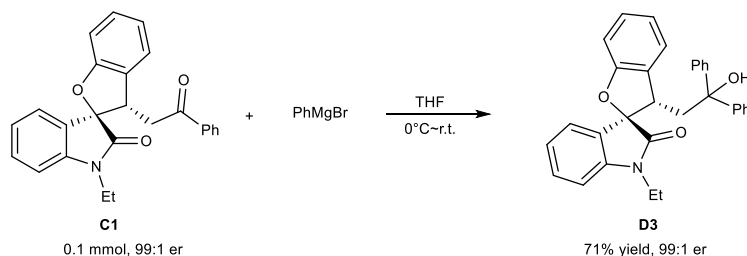

An oven-dried test tube was charged with **C1** (38.3 mg, 0.1 mmol) under N<sub>2</sub> atmosphere. After adding dry THF (1.0 mL), the system was stirred at 0 °C, followed by the injection of commercially available phenyl magnesium bromide (2.0 equiv., 1M in THF). The reaction was stirred at 0 °C for 30 min and then warmed up to room temperature for overnight. After finished, the reaction was

quenched with  $\text{NH}_4\text{Cl}$  (5 mL). The solution was extracted with ethyl acetate (3×5 mL). The combined extracts were washed with brine (8.0 mL), dried ( $\text{Na}_2\text{SO}_4$ ), filtered and concentrated in vacuo. The reaction mixture was subjected to column chromatography on silica gel and eluted with petroleum ether/ethyl acetate (v/v 3:1) to afford the corresponding product **D3** (32.7 mg, 71% yield, 99:1 er).

## 5. Unsuccessful substrates.

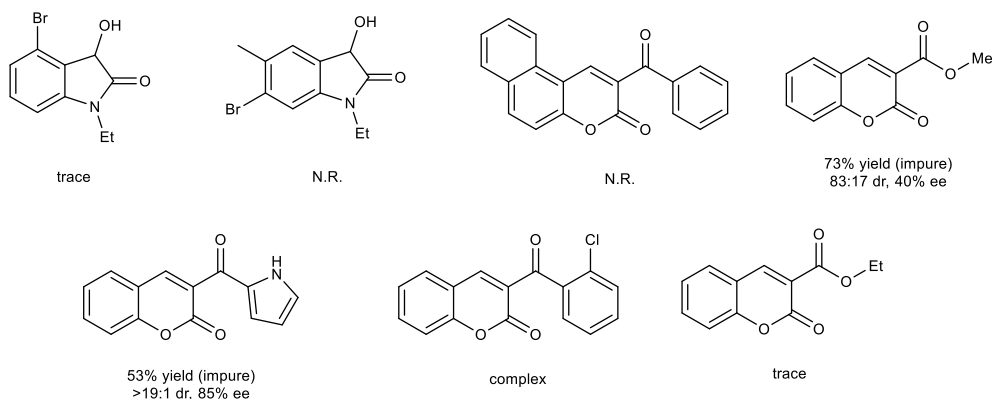

The above-mentioned substrates all reacted under standard conditions.

## 6. X-ray crystal data.

Crystals suitable for the X-ray crystal structure analysis were obtained from a solution of compound **C13** in  $\text{CH}_2\text{Cl}_2$  and petroleum ether at r.t. CCDC 2302490 contains the supplementary crystallographic data for this paper. These data are provided free of charge by The Cambridge Crystallographic Data Centre.

The colourless crystal in block-shape, with approximate dimensions of  $0.140 \times 0.214 \times 0.306 \text{ mm}^3$ , was selected and mounted for the single-crystal X-ray diffraction. The data set was collected by Bruker D8 Venture Photon II diffractometer at 173(2)K equipped with micro-focus Cu radiation source ( $K_\alpha = 1.54178\text{\AA}$ ). Applied with face-indexed numerical absorption correction, the structure solution was solved and refinement was processed by SHELXTL (version 6.14) and OLEX 2.3 program package<sup>a, b, c, d</sup>. The structure was analyzed by ADDSYM routine implemented in PLATON suite and no higher symmetry was suggested<sup>e</sup>.

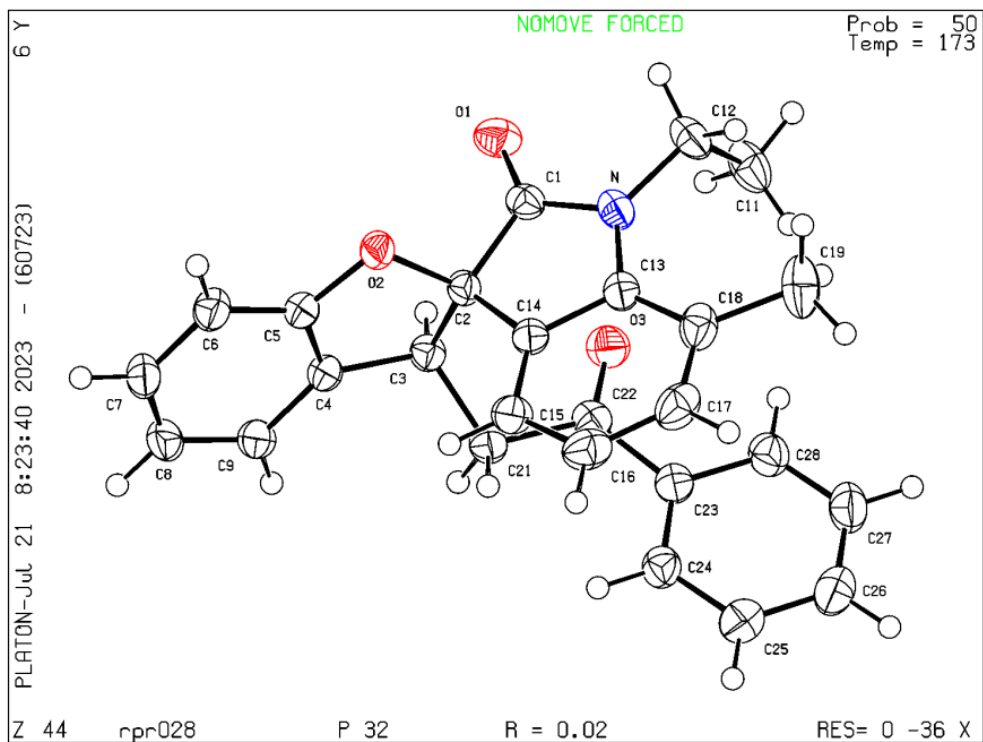

### Crystallographic Data for **C13**.

|                                             |                                   |
|---------------------------------------------|-----------------------------------|
| Formula                                     | $C_{26}H_{23}NO_3$ ( <b>C13</b> ) |
| Formula mass (amu)                          | 397.45                            |
| Space group                                 | $P3_2$                            |
| $a$ (Å)                                     | 11.2675(3)                        |
| $b$ (Å)                                     | 11.2675(3)                        |
| $c$ (Å)                                     | 13.8644(4)                        |
| $\alpha$ (deg)                              | 90                                |
| $\beta$ (deg)                               | 90                                |
| $\gamma$ (deg)                              | 120                               |
| $V$ (Å <sup>3</sup> )                       | 1524.36(9)                        |
| Z                                           | 3                                 |
| $\lambda$ (Å)                               | 1.54178                           |
| $T$ (K)                                     | 173 K                             |
| $\rho_{\text{calcd}}$ (g cm <sup>-3</sup> ) | 1.299                             |
| $\mu$ (mm <sup>-1</sup> )                   | 0.677                             |
| Transmission factors                        | 0.846-0.958                       |
| $\theta_{\text{max}}$ (deg)                 | 79.521                            |

|                                                   |        |
|---------------------------------------------------|--------|
| No. of unique data, including $F_o^2 < 0$         | 4246   |
| No. of unique data, with $F_o^2 > 2\sigma(F_o^2)$ | 4205   |
| No. of variables                                  | 274    |
| $R(F)$ for $F_o^2 > 2\sigma(F_o^2)$ <sup>a</sup>  | 0.0238 |
| $R_w(F_o^2)$ <sup>b</sup>                         | 0.0632 |
| Goodness of fit                                   | 1.047  |

---

<sup>a</sup>  $R(F) = \sum ||F_o| - |F_c|| / \sum |F_o|$ .

<sup>b</sup>  $R_w(F_o^2) = [\sum [w(F_o^2 - F_c^2)^2] / \sum wF_o^4]^{1/2}$ ;  $w^{-1} = [\sigma^2(F_o^2) + (Ap)^2 + Bp]$ , where  $p = [\max(F_o^2, 0) + 2F_c^2] / 3$ .

References:

<sup>a</sup> Sheldrick, G. M. *Acta Cryst.* 2008, **A64**, 112–122.

<sup>b</sup> Sheldrick, G. M. *Acta Cryst.* 2015, **A71**, 3–8.

<sup>c</sup> Sheldrick, G. M. *Acta Cryst.* 2015, **C71**, 3–8.

<sup>d</sup> Dolomanov, O.V., Bourhis, L.J., Gildea, R.J., Howard, J. A. K., Puschmann, H. *J. Appl. Cryst.* 2009, **42**, 339-341.

<sup>e</sup> Spek, A. L. *J. Appl. Cryst.* 2003, **36**, 7–13.



Crystals suitable for the X-ray crystal structure analysis were obtained from a solution of compound **Int2** in CH<sub>2</sub>Cl<sub>2</sub> at r.t. CCDC 2321099 contains the supplementary crystallographic data for this paper. These data are provided free of charge by The Cambridge Crystallographic Data Centre.

The orange crystal in block-shape, with approximate dimensions of 0.116 × 0.145 × 0.241 mm<sup>3</sup>, was selected and mounted for the single-crystal X-ray diffraction. The data set was collected by Bruker D8 Venture Photon II diffractometer at 173(2)K equipped with micro-focus Cu radiation source (K $\alpha$  = 1.54178Å). Applied with face-indexed numerical absorption correction, the structure solution was solved and refinement was processed by SHELXTL (version 6.14) and OLEX 2.3 program package<sup>a, b, c, d</sup>. The structure was analyzed by ADDSYM routine implemented in PLATON suite and no higher symmetry was suggested<sup>e</sup>.

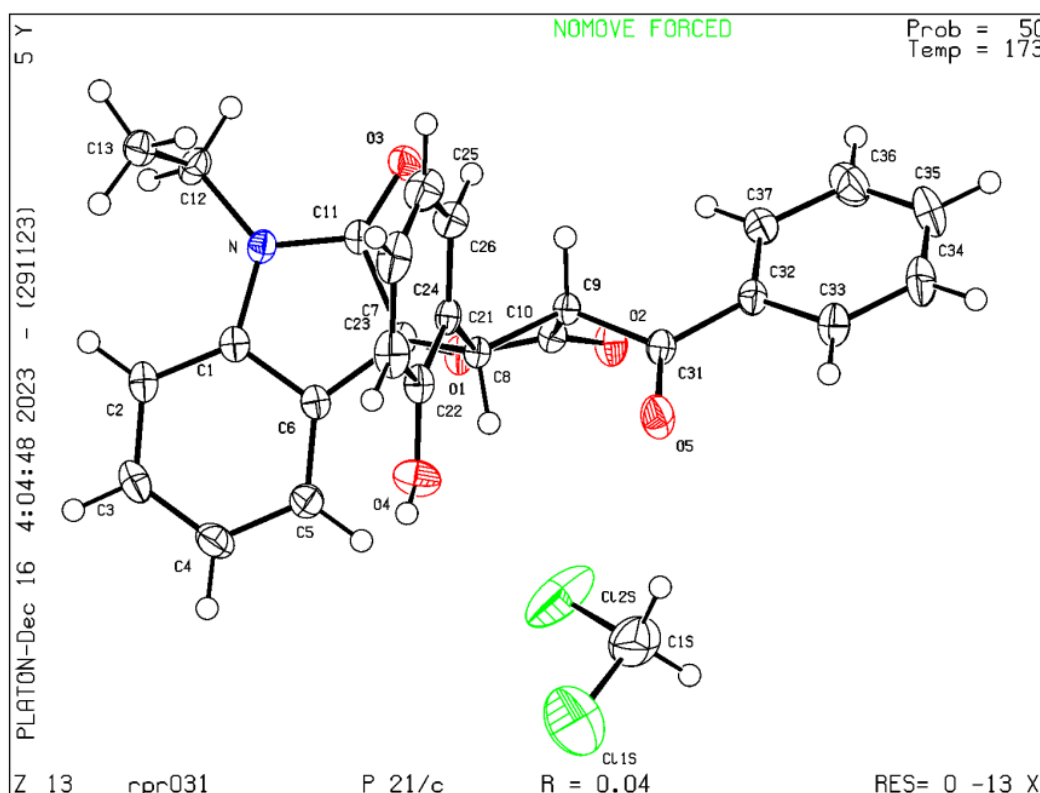

#### Crystallographic Data for **Int2**.

|                    |                                                                                                  |
|--------------------|--------------------------------------------------------------------------------------------------|
| Formula            | C <sub>26</sub> H <sub>21</sub> NO <sub>5</sub> ·CH <sub>2</sub> Cl <sub>2</sub> ( <b>Int2</b> ) |
| Formula mass (amu) | 512.36                                                                                           |
| Space group        | P2 <sub>1</sub> /c                                                                               |
| <i>a</i> (Å)       | 18.3464(4)                                                                                       |
| <i>b</i> (Å)       | 8.3122(2)                                                                                        |
| <i>c</i> (Å)       | 16.0948(3)                                                                                       |
| <i>α</i> (deg)     | 90                                                                                               |
| <i>β</i> (deg)     | 99.9900(10)                                                                                      |

|                                                   |             |
|---------------------------------------------------|-------------|
| $\gamma$ (deg)                                    | 90          |
| $V$ (Å <sup>3</sup> )                             | 2417.23(9)  |
| $Z$                                               | 4           |
| $\lambda$ (Å)                                     | 1.54178     |
| $T$ (K)                                           | 173 K       |
| $\rho_{\text{calcd}}$ (g cm <sup>-3</sup> )       | 1.408       |
| $\mu$ (mm <sup>-1</sup> )                         | 2.749       |
| Transmission factors                              | 0.793-0.997 |
| $\theta_{\text{max}}$ (deg)                       | 68.328      |
| No. of unique data, including $F_o^2 < 0$         | 4416        |
| No. of unique data, with $F_o^2 > 2\sigma(F_o^2)$ | 4021        |
| No. of variables                                  | 321         |
| $R(F)$ for $F_o^2 > 2\sigma(F_o^2)$ <sup>a</sup>  | 0.0404      |
| $R_w(F_o^2)$ <sup>b</sup>                         | 0.1017      |
| Goodness of fit                                   | 1.052       |

---

<sup>a</sup>  $R(F) = \sum ||F_o| - |F_c|| / \sum |F_o|$ .

<sup>b</sup>  $R_w(F_o^2) = [\sum [w(F_o^2 - F_c^2)^2] / \sum wF_o^4]^{1/2}$ ;  $w^{-1} = [\sigma^2(F_o^2) + (Ap)^2 + Bp]$ , where  $p = [\max(F_o^2, 0) + 2F_c^2] / 3$ .

References:

<sup>a</sup> Sheldrick, G. M. *Acta Cryst.* 2008, **A64**, 112–122.

<sup>b</sup> Sheldrick, G. M. *Acta Cryst.* 2015, **A71**, 3–8.

<sup>c</sup> Sheldrick, G. M. *Acta Cryst.* 2015, **C71**, 3–8.

<sup>d</sup> Dolomanov, O.V., Bourhis, L.J., Gildea, R.J., Howard, J. A. K., Puschmann, H. *J. Appl. Cryst.* 2009, **42**, 339-341.

<sup>e</sup> Spek, A. L. *J. Appl. Cryst.* 2003, **36**, 7–13.

## 7. Control experiments and mechanistic studies

The intermediate **Int2** could be isolated during the reaction process, we monitoring the reaction system in different reaction times discovery the yield of **Int2** increased firstly then decreased gradually, and just obtained the moderate ee value of **Int2** in the early stage of the reaction, and the ee value of **Int2** gradually decreased along with the reaction progresses. The dr value of **Int2** was >19:1 and maintain all the time. The yield of final product **C1** increased gradually and the ee value of **C1** had a slight decrease.

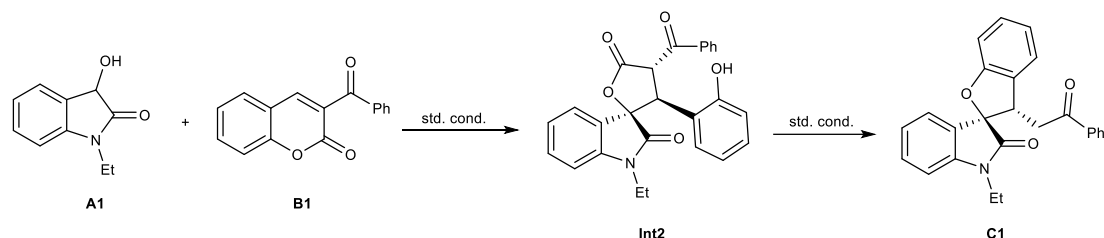

| Reaction time/h | Yield of <b>Int2</b> (%) | ee of <b>Int2</b> (%) | dr of <b>Int2</b> | Yield of <b>C1</b> (%) | ee of <b>C1</b> (%) | dr of <b>C1</b> |
|-----------------|--------------------------|-----------------------|-------------------|------------------------|---------------------|-----------------|
| 0               | 0                        | 0                     | 0                 | 0                      | 0                   | 0               |
| 1               | 44                       | 45                    | >19:1             | 4                      | 98                  | >19:1           |
| 3               | 72                       | 45                    | >19:1             | 11                     | 94                  | >19:1           |
| 6               | 78                       | 39                    | >19:1             | 21                     | 95                  | >19:1           |
| 12              | 60                       | 17                    | >19:1             | 39                     | 92                  | >19:1           |
| 24              | 29                       | -6                    | >19:1             | 70                     | 90                  | >19:1           |
| 36              | 11                       | -13                   | >19:1             | 88                     | 90                  | >19:1           |
| 48              | 4                        | -13                   | >19:1             | 94                     | 90                  | >19:1           |

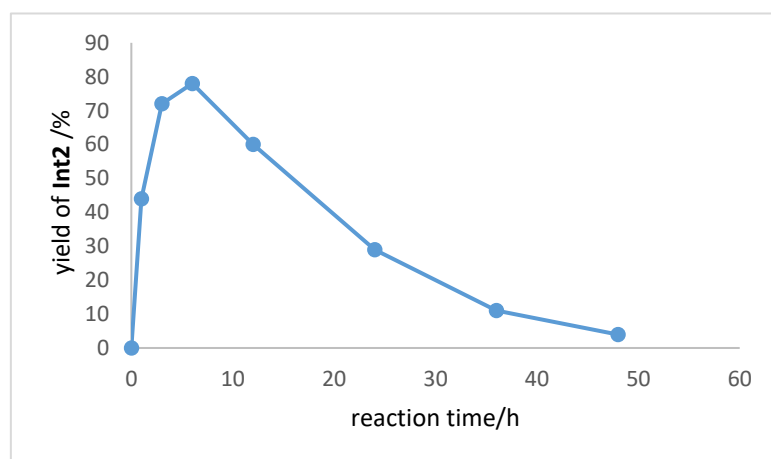

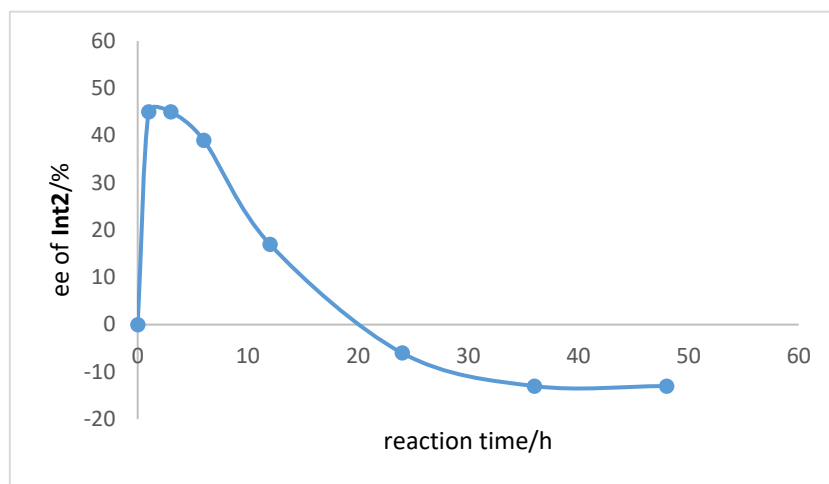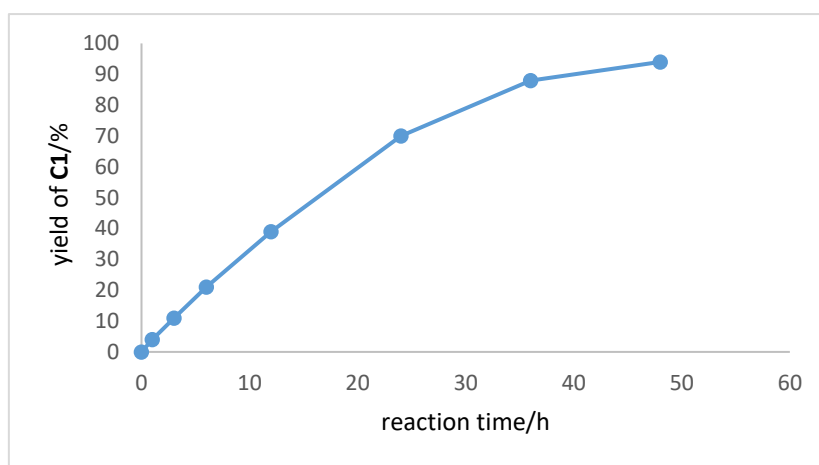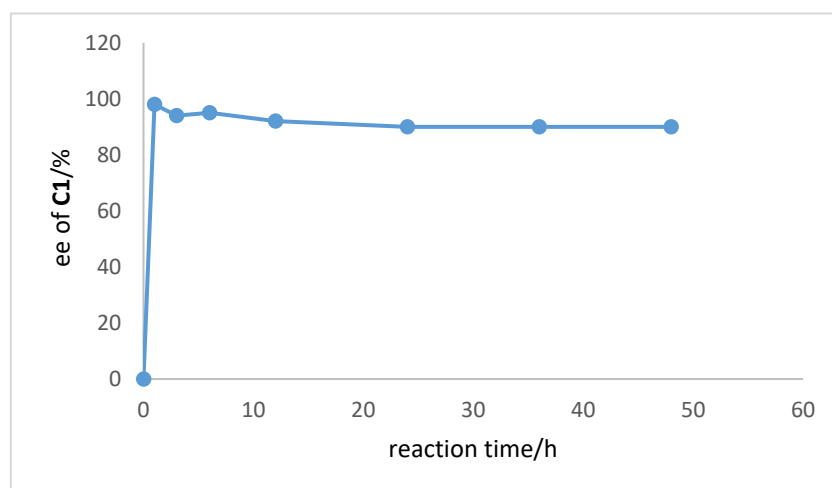

We choose racemic intermediate **Int2** as substrate, put intermediate **Int2** into standard conditions, by monitoring the ee and dr value of the product **C1**, it could be found that the racemic intermediate **Int2** could transform into product **C1** with high ee value. And intermediate **Int2** could be completely converted into product **C1**, the yield of product **C1** were increased as time goes on, the dr value of **C1** >19:1 all the time, only one type diastereoisomer could be detected in the reaction system. These control experiments demonstrate the process of releasing CO<sub>2</sub> involve the disappearance of chiral centers, the chiral guanidine not only control the first step of Michael

reaction, but also control the next cyclizing step, the ee and dr value of the product were determined in the last cyclizing step.

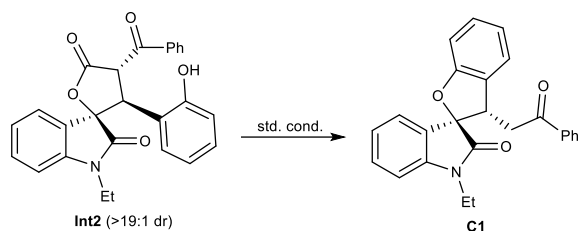

| reaction time | yield of <b>C1</b> (%) | ee of <b>C1</b> (%) | dr of <b>C1</b> |
|---------------|------------------------|---------------------|-----------------|
| 15 h          | 20                     | 96                  | >19:1           |
| 27 h          | 25                     | 94                  | >19:1           |
| 39 h          | 39                     | 93                  | >19:1           |
| 50 h          | 47                     | 92                  | >19:1           |
| 110 h         | 99                     | 91                  | >19:1           |

The ee and dr value of product **C37** were unchanging when once again putting it into standard condition (eq. 1). The process retro-Michael reaction then Michael reaction of final product could be ruled out. When using coumarin-3-carboxylate ester as substrate, using DBU as base, corresponding **Int2** could be isolated smoothly, no reaction occur in the standard condition, when increasing the reaction temperature to 60 °C, the corresponding final product could be isolated in 54% yield after 23 h (eq. 2). This can be inferred that last cyclizing step involve in Michael addition, due to the reaction activity of ester group weaker than carbonyl group, the reaction is difficult to occur for coumarin-3-carboxylate at standard condition.

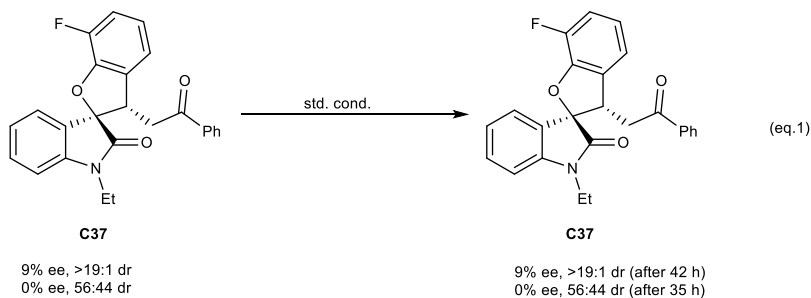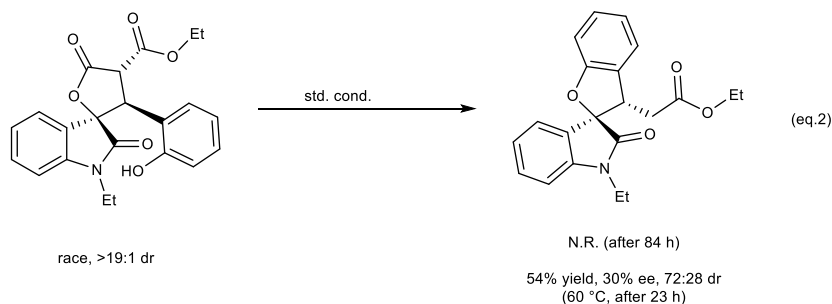

## 8. Spectral characterization data for the products

### (2*R*,3*S*)-1'-ethyl-3-(2-oxo-2-phenylethyl)-3*H*-spiro[benzofuran-2,3'-indolin]-2'-one (C1):

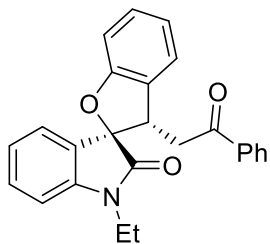

White solid, 94% yield, 95:5 er, >19:1 dr, m.p. 63-67 °C,  $[\alpha]_D^{25} = -57.3$  ( $c = 0.4$ , in  $\text{CH}_2\text{Cl}_2$ ). Reacted for 48 h.

**SFC** Daicel Chiralcel OJ-3,  $\text{CO}_2/\text{MeOH} = 85/15$ , 1.5 mL/min,  $\lambda = 240$  nm,  $t_1 = 2.81$  min,  $t_2 = 5.90$  min.

**$^1\text{H NMR}$**  (400 MHz, Chloroform- $d$ )  $\delta$  7.62 (d,  $J = 7.4$  Hz, 2H), 7.47 (t,  $J = 7.4$  Hz, 1H), 7.32 (t,  $J = 7.7$  Hz, 2H), 7.23 – 7.20 (m, 2H), 7.12 (t,  $J = 7.8$  Hz, 1H), 7.06 (d,  $J = 7.3$  Hz, 1H), 6.97 (t,  $J = 7.4$  Hz, 1H), 6.88 (d,  $J = 8.1$  Hz, 1H), 6.81 – 6.70 (m, 2H), 4.64 (t,  $J = 7.5$  Hz, 1H), 3.96 – 3.87 (m, 1H), 3.78 – 3.69 (m, 1H), 3.52 – 3.41 (m, 2H), 1.37 (t,  $J = 7.2$  Hz, 3H).

**$^{13}\text{C NMR}$**  (101 MHz, Chloroform- $d$ )  $\delta$  197.0, 175.1, 158.8, 143.6, 136.3, 130.6, 129.0, 128.8, 128.5, 127.7, 125.8, 124.9, 123.9, 122.1, 121.4, 110.2, 109.0, 89.0, 44.4, 40.4, 35.1, 12.4.

**HRMS** (ESI)  $m/z$ :  $[\text{M} + \text{Na}]^+$  Calculated for  $[\text{C}_{25}\text{H}_{21}\text{NO}_3\text{Na}]^+$ : 406.1414 found 406.1414.

**IR** (neat) 3058, 2928, 1726, 1682, 1607, 1471, 1366, 1286, 1230, 1103, 994, 751, 692  $\text{cm}^{-1}$ .

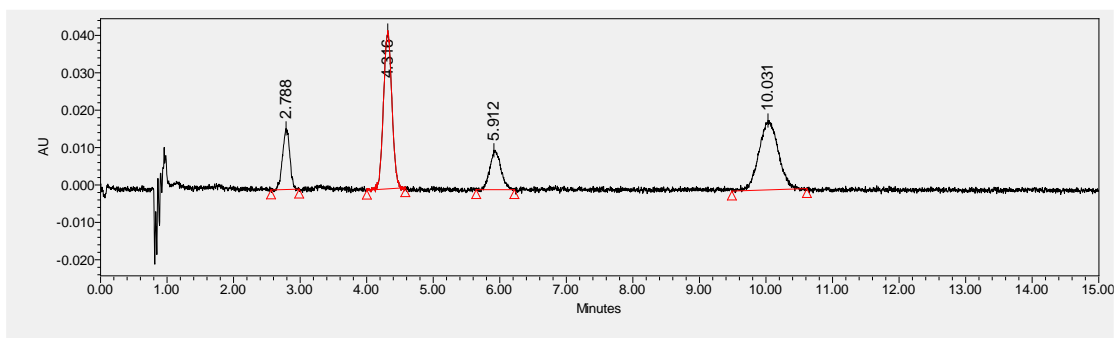

|   | Retention Time | Area   | % Area |
|---|----------------|--------|--------|
| 1 | 2.788          | 124179 | 12.47  |
| 2 | 4.316          | 372365 | 37.40  |
| 3 | 5.912          | 122133 | 12.27  |
| 4 | 10.031         | 377019 | 37.86  |

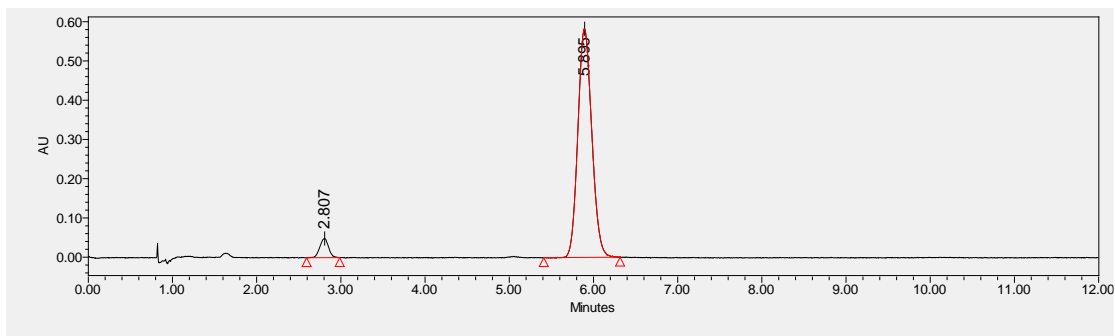

|   | Retention Time | Area    | % Area |
|---|----------------|---------|--------|
| 1 | 2.807          | 353321  | 5.02   |
| 2 | 5.895          | 6691459 | 94.98  |

**(2R,3S)-1'-ethyl-5'-methyl-3-(2-oxo-2-phenylethyl)-3H-spiro[benzofuran-2,3'-indolin]-2'-one (C2):**

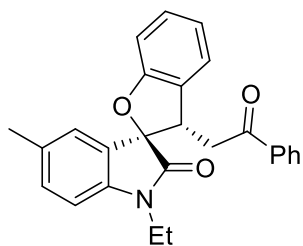

Yellow solid, 99% yield, 94:6 er, >19:1 dr, m.p. 66-70 °C,  $[\alpha]_D^{20} = -66.6$  (c = 0.86, in CH<sub>2</sub>Cl<sub>2</sub>). Reacted for 108 h.

**SFC** Daicel Chiralcel OD-3, CO<sub>2</sub>/MeOH = 85/15, 1.5 mL/min,  $\lambda = 240$  nm,  $t_1 = 4.98$  min,  $t_2 = 6.83$  min.

**<sup>1</sup>H NMR** (400 MHz, Chloroform-*d*)  $\delta$  7.61 (d,  $J = 7.5$  Hz, 2H), 7.47 (t,  $J = 7.4$  Hz, 1H), 7.33 (t,  $J = 7.7$  Hz, 2H), 7.24 – 7.20 (m, 2H), 6.98 (t,  $J = 7.4$  Hz, 1H), 6.94 – 6.83 (m, 3H), 6.60 (d,  $J = 8.5$  Hz, 1H), 4.65 (dd,  $J = 10.6, 4.5$  Hz, 1H), 3.93 – 3.84 (m, 1H), 3.75 – 3.66 (m, 1H), 3.51 (dd,  $J = 17.8, 10.7$  Hz, 1H), 3.38 (dd,  $J = 17.8, 4.6$  Hz, 1H), 2.04 (s, 3H), 1.35 (t,  $J = 7.2$  Hz, 3H).

**<sup>13</sup>C NMR** (101 MHz, Chloroform-*d*)  $\delta$  196.9, 175.0, 158.9, 141.2, 136.4, 133.1, 131.7, 130.8, 129.0, 128.9, 128.4, 127.6, 125.8, 123.9, 121.4, 110.2, 108.7, 89.1, 44.6, 40.5, 35.1, 20.8, 12.4

**HRMS** (ESI)  $m/z$ :  $[M + Na]^+$  Calculated for [C<sub>26</sub>H<sub>23</sub>NO<sub>3</sub>Na<sup>+</sup>]: 420.1570 found 420.1572.

**IR** (neat) 3058, 2979, 2934, 1724, 1682, 1486, 1369, 1217, 994, 750, 689 cm<sup>-1</sup>.

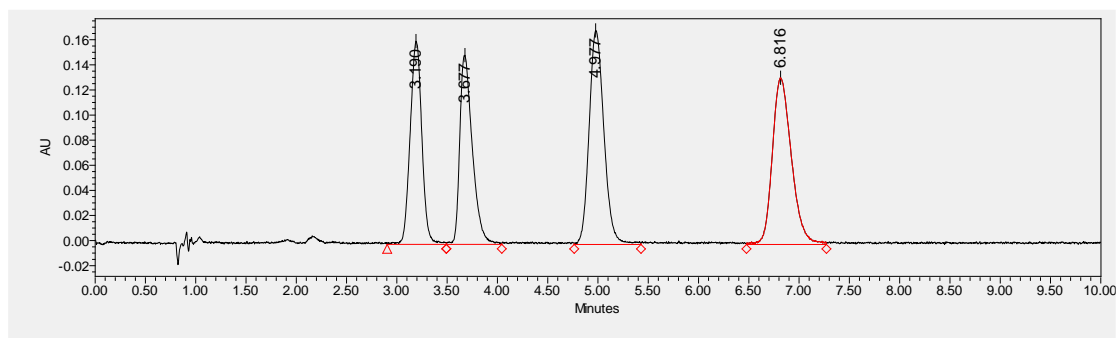

|   | Retention Time | Area    | % Area |
|---|----------------|---------|--------|
| 1 | 3.190          | 1312071 | 21.44  |
| 2 | 3.677          | 1310335 | 21.41  |
| 3 | 4.977          | 1745341 | 28.52  |
| 4 | 6.816          | 1751158 | 28.62  |

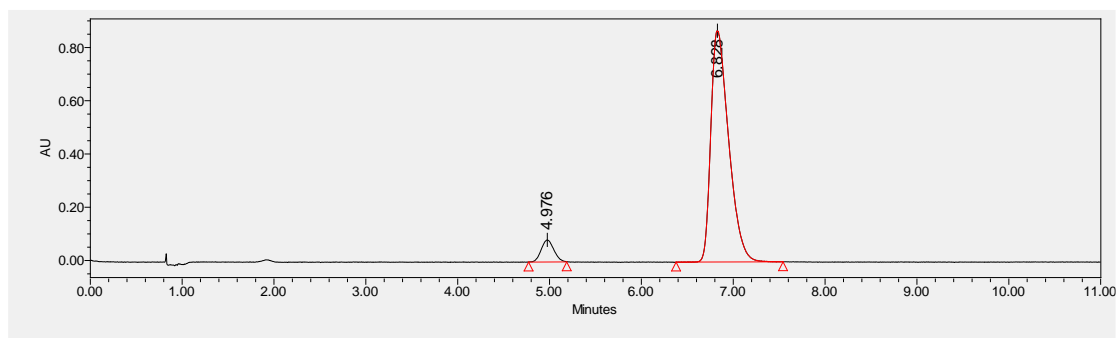

|   | Retention Time | Area     | % Area |
|---|----------------|----------|--------|
| 1 | 4.976          | 794727   | 6.36   |
| 2 | 6.828          | 11700483 | 93.64  |

**(2*R*,3*S*)-1'-ethyl-5'-fluoro-3-(2-oxo-2-phenylethyl)-3*H*-spiro[benzofuran-2,3'-indolin]-2'-one (C3):**

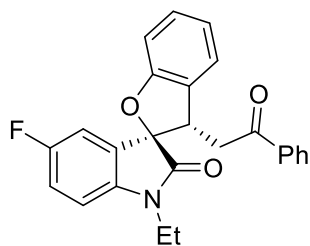

White solid, 99% yield, 93:7 er, >19:1 dr, m.p. 66-68 °C,  $[\alpha]_D^{20} = -55.8$  (c = 0.76, in CH<sub>2</sub>Cl<sub>2</sub>). Reacted for 108 h.

**SFC** Daicel Chiralcel OD-3, CO<sub>2</sub>/MeOH = 85/15, 1.5 mL/min,  $\lambda = 240$  nm,  $t_1 = 4.67$  min,  $t_2 = 6.43$  min.

**<sup>1</sup>H NMR** (400 MHz, Chloroform-*d*)  $\delta$  7.71 – 7.62 (m, 2H), 7.49 (t,  $J = 7.4$  Hz, 1H), 7.35 (t,  $J = 7.7$  Hz, 2H), 7.25 – 7.20 (m, 2H), 6.99 (t,  $J = 7.4$  Hz, 1H), 6.89 (m, 1H), 6.84 – 6.80 (t,  $J = 8.3$  Hz, 2H), 6.69 –

6.62 (m, 1H), 4.64 (dd,  $J = 10.4, 4.8$  Hz, 1H), 3.96 – 3.87 (m, 1H), 3.76 – 3.67 (m, 1H), 3.58 – 3.38 (m, 2H), 1.37 (t,  $J = 7.2$  Hz, 3H).

**<sup>13</sup>C NMR** (101 MHz, Chloroform-*d*)  $\delta$  196.8, 174.8, 158.6, 158.5 (d,  $J = 242.4$  Hz), 139.7, 136.0, 133.4, 129.2, 128.6, 128.4, 127.7, 127.1 (d,  $J = 7.6$  Hz), 123.9, 121.6, 116.8 (d,  $J = 23.4$  Hz), 112.9 (d,  $J = 24.7$  Hz), 110.3, 109.5 (d,  $J = 7.8$  Hz), 88.9, 44.6, 40.1, 35.2, 12.3.

**<sup>19</sup>F NMR** (376 MHz, Chloroform-*d*)  $\delta$  -120.85.

**HRMS** (ESI)  $m/z$ : [M + Na]<sup>+</sup> Calculated for [C<sub>25</sub>H<sub>20</sub>FNO<sub>3</sub>Na<sup>+</sup>]: 424.1319 found 424.1314.

**IR** (neat) 3059, 2981, 2936, 1727, 1682, 1485, 1454, 1240, 1206, 878, 817, 750, 688 cm<sup>-1</sup>.

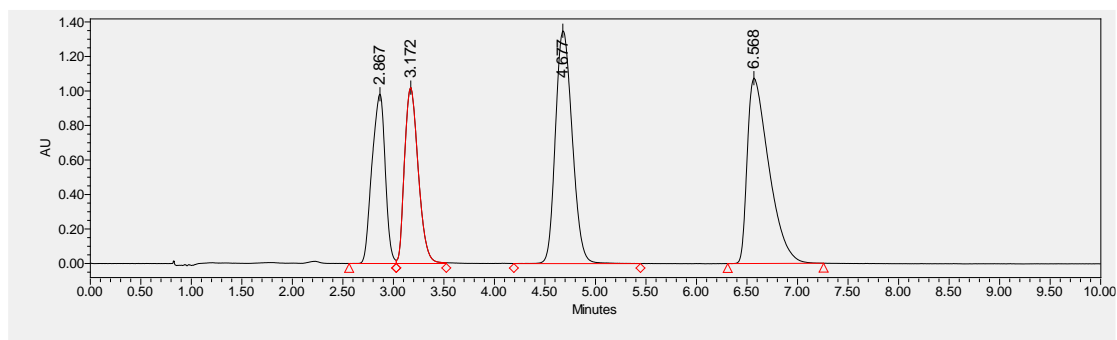

|   | Retention Time | Area     | % Area |
|---|----------------|----------|--------|
| 1 | 2.867          | 8903534  | 17.79  |
| 2 | 3.172          | 9602548  | 19.19  |
| 3 | 4.677          | 15582172 | 31.13  |
| 4 | 6.568          | 15960954 | 31.89  |

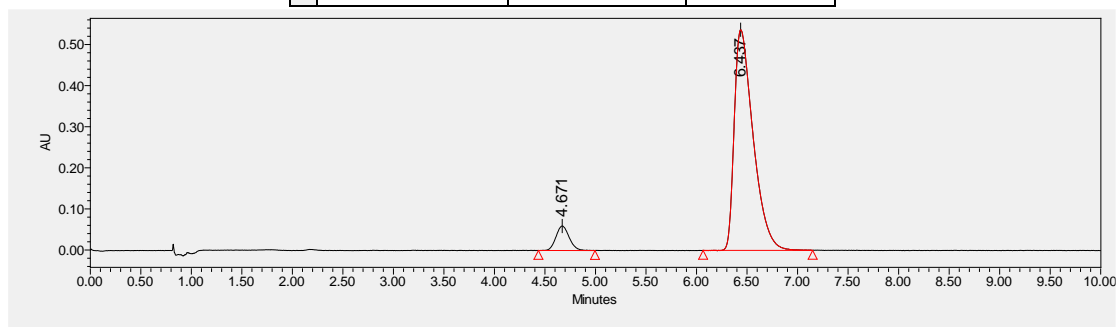

|   | Retention Time | Area    | % Area |
|---|----------------|---------|--------|
| 1 | 4.668          | 704328  | 7.05   |
| 2 | 6.434          | 9284544 | 92.95  |



**(2*R*,3*S*)-5'-chloro-1'-ethyl-3-(2-oxo-2-phenylethyl)-3*H*-spiro[benzofuran-2,3'-indolin]-2'-one (C4):**

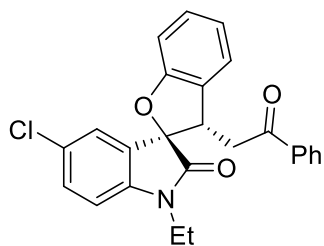

White solid, 99% yield, 93:7 er, >19:1 dr, m.p. 67-72 °C,  $[\alpha]_D^{20} = -115.1$  ( $c = 0.80$ , in  $\text{CH}_2\text{Cl}_2$ ). Reacted for 108 h.

**SFC** Daicel Chiralcel OD-3,  $\text{CO}_2/\text{MeOH} = 85/15$ , 1.5 mL/min,  $\lambda = 240$  nm,  $t_1 = 5.56$  min,  $t_2 = 8.63$  min.

**$^1\text{H NMR}$**  (400 MHz, Chloroform-*d*)  $\delta$  7.70 – 7.61 (m, 2H), 7.50 (t,  $J = 7.4$  Hz, 1H), 7.36 (t,  $J = 7.7$  Hz, 2H), 7.26 – 7.21 (m, 2H), 7.10 – 6.95 (m, 3H), 6.89 (d,  $J = 8.0$  Hz, 1H), 6.63 (d,  $J = 8.3$  Hz, 1H),

4.73 – 4.56 (m, 1H), 3.96 – 3.87 (m, 1H), 3.75 – 3.66 (m, 1H), 3.52 – 3.42 (m, 2H), 1.37 (t,  $J = 7.2$  Hz, 3H).

**$^{13}\text{C NMR}$**  (101 MHz, Chloroform-*d*)  $\delta$  196.9, 174.7, 158.5, 142.3, 136.0, 133.4, 130.4, 129.2, 128.6, 128.3, 127.7, 127.4, 127.4, 125.3, 123.9, 110.3, 109.9, 88.7, 44.7, 40.1, 35.2, 12.3.

**HRMS** (ESI)  $m/z$ :  $[\text{M} + \text{Na}]^+$  Calculated for  $[\text{C}_{25}\text{H}_{20}^{35}\text{ClNO}_3\text{Na}^+]$ : 440.1024 found 440.1023.

**HRMS** (ESI)  $m/z$ :  $[\text{M} + \text{Na}]^+$  Calculated for  $[\text{C}_{25}\text{H}_{20}^{37}\text{ClNO}_3\text{Na}^+]$ : 442.0994 found 442.0993.

**IR** (neat) 3061, 2981, 2936, 1731, 1682, 1604, 1481, 1366, 996, 867, 751, 689  $\text{cm}^{-1}$ .

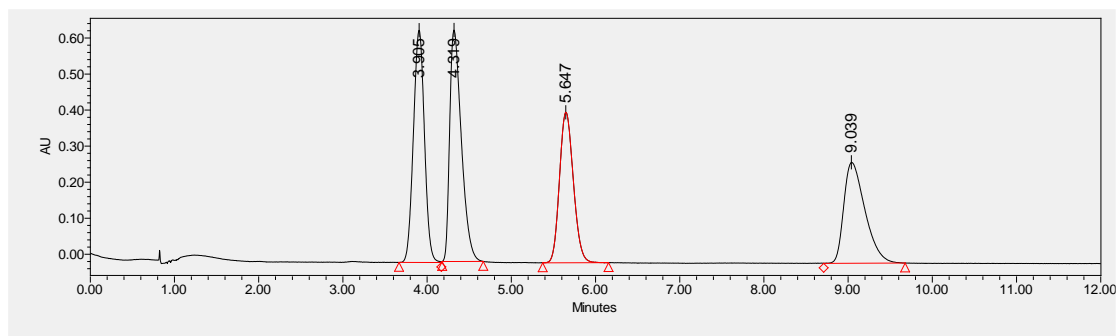

|   | Retention Time | Area    | % Area |
|---|----------------|---------|--------|
| 1 | 3.905          | 5861014 | 27.04  |
| 2 | 4.319          | 6156827 | 28.41  |
| 3 | 5.647          | 4777072 | 22.04  |
| 4 | 9.039          | 4878035 | 22.51  |

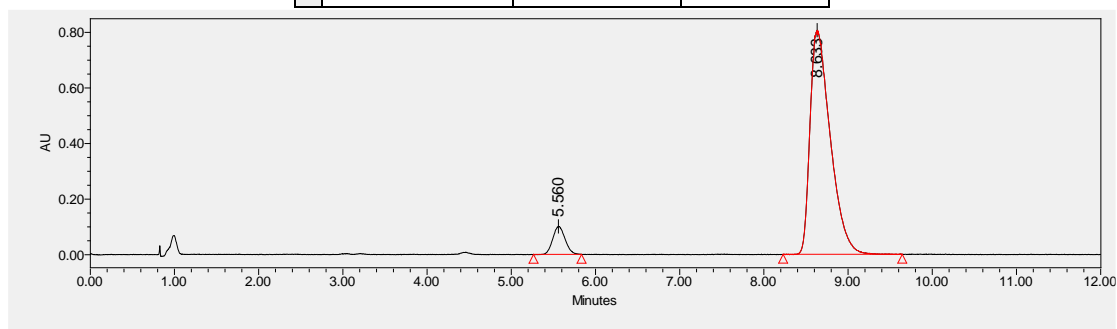

|   | Retention Time | Area     | % Area |
|---|----------------|----------|--------|
| 1 | 5.560          | 1027378  | 7.10   |
| 2 | 8.633          | 13447629 | 92.90  |

**(2R,3S)-5'-bromo-1'-ethyl-3-(2-oxo-2-phenylethyl)-3H-spiro[benzofuran-2,3'-indolin]-2'-one (C5):**

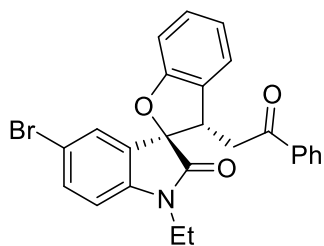

White solid, 99% yield, 93:7 er, >19:1 dr, m.p. 75-78 °C,  $[\alpha]_D^{20} = -36.9$  (c = 0.95, in CH<sub>2</sub>Cl<sub>2</sub>). Reacted for 108 h.

**SFC** Daicel Chiracel OJ-3, CO<sub>2</sub>/MeOH = 85/15, 1.5 mL/min,  $\lambda = 240$  nm,  $t_1 = 3.26$  min,  $t_2 = 9.47$  min.

**<sup>1</sup>H NMR** (400 MHz, Chloroform-*d*)  $\delta$  7.70 – 7.62 (m, 2H), 7.54 – 7.47 (m, 1H), 7.37 (t,  $J = 7.7$  Hz, 2H), 7.26 – 7.15 (m, 4H), 7.01 (t,  $J = 7.4$  Hz, 1H), 6.90 (d,  $J = 8.0$  Hz, 1H), 6.58 (d,  $J = 8.3$  Hz, 1H),

4.63 (t,  $J = 7.7$  Hz, 1H), 3.91 (dq,  $J = 14.5, 7.3$  Hz, 1H), 3.70 (dq,  $J = 14.3, 7.2$  Hz, 1H), 3.54 – 3.44 (m, 2H), 1.37 (t,  $J = 7.2$  Hz, 3H).

**<sup>13</sup>C NMR** (101 MHz, Chloroform-*d*)  $\delta$  196.9, 174.5, 158.5, 142.7, 135.9, 133.4, 133.2, 129.2, 128.5, 128.2, 127.9, 127.7, 127.6, 123.8, 121.6, 114.5, 110.3, 88.6, 77.1, 44.7, 40.1, 35.2, 12.2.

**HRMS** (ESI)  $m/z$ :  $[M + Na]^+$  Calculated for  $[C_{25}H_{20}^{79}BrNO_3Na]^+$ : 484.0519 found 484.0513.

**HRMS** (ESI)  $m/z$ :  $[M + Na]^+$  Calculated for  $[C_{25}H_{20}^{81}BrNO_3Na]^+$ : 486.0498 found 486.0495.

**IR** (neat) 3060, 2980, 2935, 1731, 1682, 1480, 1428, 1241, 1148, 1112, 995, 752 cm<sup>-1</sup>.

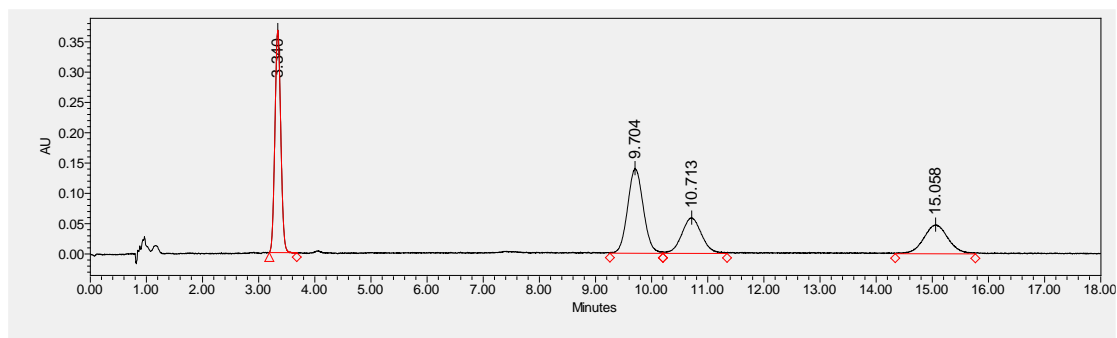

|   | Retention Time | Area    | % Area |
|---|----------------|---------|--------|
| 1 | 3.340          | 2654562 | 32.17  |
| 2 | 9.704          | 2706072 | 32.79  |
| 3 | 10.713         | 1441938 | 17.47  |
| 4 | 15.058         | 1449909 | 17.57  |

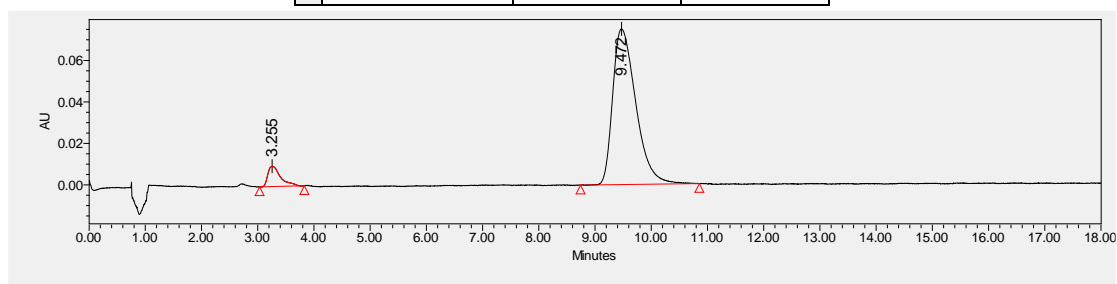

|   | Retention Time | Area    | % Area |
|---|----------------|---------|--------|
| 1 | 3.255          | 153552  | 6.69   |
| 2 | 9.472          | 2142875 | 93.31  |

**(2*R*,3*S*)-1'-ethyl-5'-iodo-3-(2-oxo-2-phenylethyl)-3*H*-spiro[benzofuran-2,3'-indolin]-2'-one (C6):**

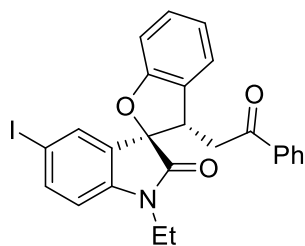

Yellow solid, 99% yield, 94:6 er, >19:1 dr, m.p. 77-82 °C,  $[\alpha]_D^{20} = -147.7$  ( $c = 0.92$ , in  $\text{CH}_2\text{Cl}_2$ ). Reacted for 120 h.

**SFC** Daicel Chiralcel OD-3,  $\text{CO}_2/\text{MeOH} = 85/15$ , 1.5 mL/min,  $\lambda = 240$  nm,  $t_1 = 7.25$  min,  $t_2 = 11.68$  min.

**$^1\text{H NMR}$**  (400 MHz, Chloroform-*d*)  $\delta$  7.64 (d,  $J = 7.3$  Hz, 2H), 7.50 (t,  $J = 7.4$  Hz, 1H), 7.41 – 7.31 (m, 4H), 7.26 – 7.18 (m, 2H), 7.00 (t,  $J = 7.4$  Hz, 1H), 6.89 (d,  $J = 8.0$  Hz, 1H), 6.48 (d,  $J = 8.2$  Hz, 1H),

4.63 (dd,  $J = 10.7, 4.7$  Hz, 1H), 3.89 (dq,  $J = 14.5, 7.3$  Hz, 1H), 3.69 (dq,  $J = 14.3, 7.2$  Hz, 1H), 3.56 – 3.38 (m, 2H), 1.36 (t,  $J = 7.2$  Hz, 3H).

**$^{13}\text{C NMR}$**  (101 MHz, Chloroform-*d*)  $\delta$  197.0, 174.4, 158.6, 143.5, 139.3, 136.0, 133.5, 133.4, 129.2, 128.6, 128.2, 127.7, 123.9, 121.7, 110.9, 110.3, 88.5, 84.2, 44.9, 40.3, 35.2, 12.3.

**HRMS** (ESI)  $m/z$ :  $[\text{M} + \text{Na}]^+$  Calculated for  $[\text{C}_{25}\text{H}_{20}\text{INO}_3\text{Na}^+]$ : 532.0380 found 532.0386.

**IR** (neat) 3058, 2980, 2934, 1727, 1680, 1600, 1477, 1348, 1227, 1111, 994, 814, 739, 691  $\text{cm}^{-1}$ .

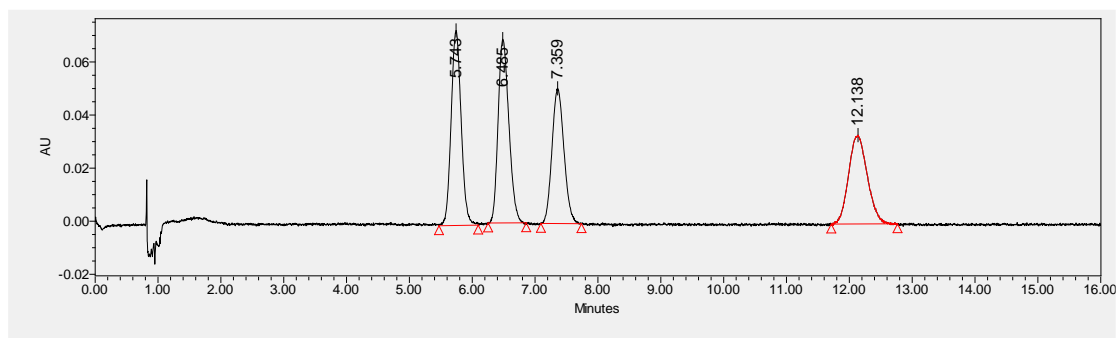

|   | Retention Time | Area   | % Area |
|---|----------------|--------|--------|
| 1 | 5.743          | 813760 | 27.10  |
| 2 | 6.485          | 824996 | 27.48  |
| 3 | 7.359          | 673625 | 22.44  |
| 4 | 12.138         | 689893 | 22.98  |

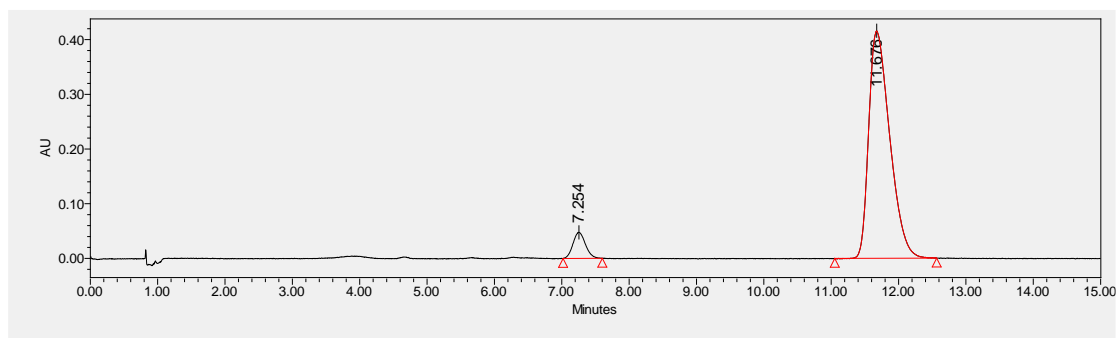

|   | Retention Time | Area    | % Area |
|---|----------------|---------|--------|
| 1 | 7.254          | 611658  | 6.36   |
| 2 | 11.676         | 9002916 | 93.64  |

**(2*R*,3*S*)-1'-ethyl-3-(2-oxo-2-phenylethyl)-5'-(trifluoromethoxy)-3*H*-spiro[benzofuran-2,3'-indolin]-2'-one (C7):**

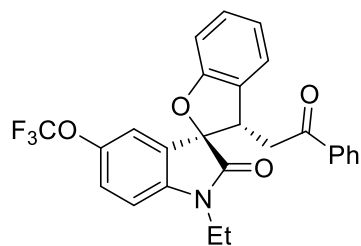

White solid, 89% yield, 96:4 er, >19:1 dr, m.p. 64-68 °C,  $[\alpha]_D^{20} = -51.3$  (c = 0.83, in CH<sub>2</sub>Cl<sub>2</sub>). Reacted for 72 h.

**SFC** Daicel Chiralcel OD-3, CO<sub>2</sub>/MeOH = 85/15, 1.5 mL/min,  $\lambda = 240$  nm,  $t_1 = 2.64$  min,  $t_2 = 3.80$  min.

**<sup>1</sup>H NMR** (400 MHz, Chloroform-*d*)  $\delta$  7.68 – 7.57 (m, 2H), 7.48 (t,  $J = 7.4$  Hz, 1H), 7.33 (t,  $J = 7.8$  Hz, 2H), 7.23 (dd,  $J = 7.5, 3.3$  Hz, 2H), 7.06 – 6.97 (m, 2H), 6.95 (s, 1H), 6.90 (d,  $J = 8.0$  Hz, 1H), 6.71 (d,  $J = 8.5$  Hz, 1H), 4.65 (dd,  $J = 9.7, 5.6$  Hz, 1H), 3.94 (dq,  $J = 14.5, 7.3$  Hz, 1H), 3.74 (dq,  $J = 14.4, 7.2$  Hz, 1H), 3.58 – 3.41 (m, 2H), 1.39 (t,  $J = 7.2$  Hz, 3H).

**<sup>13</sup>C NMR** (101 MHz, Chloroform-*d*)  $\delta$  196.9, 175.0, 158.6, 143.9, 142.6, 136.0, 133.5, 129.3, 128.6, 128.2, 127.6, 123.9, 123.8, 121.8, 119.2, 110.4, 109.3, 88.6, 44.6, 40.4, 35.4, 12.3.

**<sup>19</sup>F NMR** (376 MHz, Chloroform-*d*)  $\delta$  -58.70.

**HRMS** (ESI)  $m/z$ :  $[M + Na]^+$  Calculated for [C<sub>26</sub>H<sub>20</sub>F<sub>3</sub>NO<sub>4</sub>Na<sup>+</sup>]: 490.1237 found 490.1238.

**IR** (neat) 3061, 2981, 1731, 1682, 1484, 1453, 1246, 1210, 1163, 1112, 995, 750, 689 cm<sup>-1</sup>.

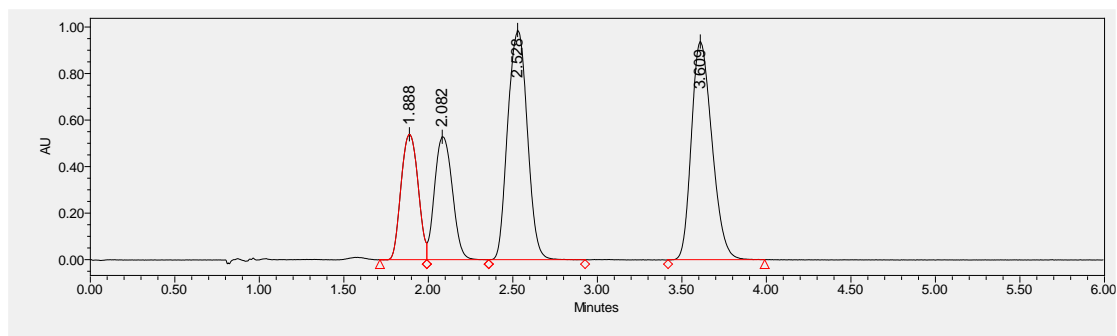

|   | Retention Time | Area    | % Area |
|---|----------------|---------|--------|
| 1 | 1.888          | 3763647 | 16.04  |
| 2 | 2.082          | 3860671 | 16.45  |
| 3 | 2.528          | 7924390 | 33.77  |
| 4 | 3.609          | 7917295 | 33.74  |

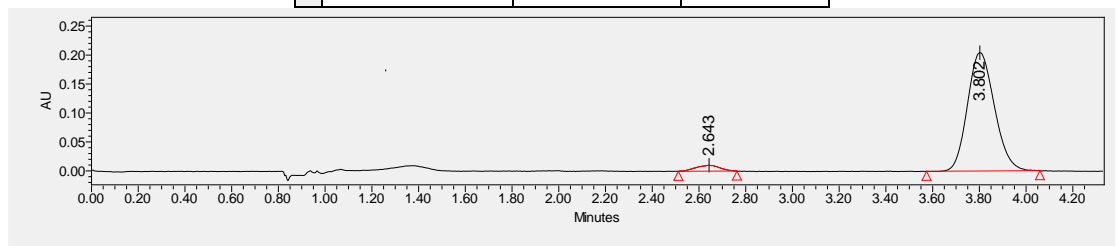

|   | Retention Time | Area    | % Area |
|---|----------------|---------|--------|
| 1 | 2.643          | 71287   | 4.16   |
| 2 | 3.802          | 1640611 | 95.84  |

**(2*R*,3*S*)-1'-ethyl-5',7'-dimethyl-3-(2-oxo-2-phenylethyl)-3*H*-spiro[benzofuran-2,3'-indolin]-2'-one (C8):**

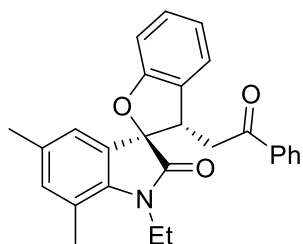

Yellow solid, 99% yield, 94:6 er, >19:1 dr, m.p. 59-62 °C,  $[\alpha]_D^{20} = -50.4$  ( $c = 0.50$ , in  $\text{CH}_2\text{Cl}_2$ ). Reacted for 120 h.

**SFC** Daicel Chiralcel OJ-3,  $\text{CO}_2/\text{MeOH} = 85/15$ , 1.5 mL/min,  $\lambda = 240$  nm,  $t_1 = 2.40$  min,  $t_2 = 6.86$  min.

**$^1\text{H NMR}$**  (400 MHz, Chloroform-*d*)  $\delta$  7.66 – 7.57 (m, 2H), 7.47 (t,  $J = 7.4$  Hz, 1H), 7.33 (t,  $J = 7.7$  Hz, 2H), 7.23 – 7.19 (m, 2H), 6.97 (t,  $J = 7.2$  Hz, 1H), 6.89 (d,  $J = 7.9$  Hz, 1H), 6.70 (s, 1H), 6.60 (s, 1H), 4.65 (dd,  $J = 10.5, 4.6$  Hz, 1H), 4.07 – 3.92 (m, 2H), 3.48 (dd,  $J = 17.6, 10.6$  Hz, 1H), 3.32 (dd,  $J = 17.6, 4.7$  Hz, 1H), 2.34 (s, 3H), 1.99 (s, 3H), 1.37 (t,  $J = 7.1$  Hz, 3H).

**$^{13}\text{C NMR}$**  (101 MHz, Chloroform-*d*)  $\delta$  196.9, 176.2, 159.0, 139.0, 136.4, 134.9, 133.1, 131.7, 128.9, 128.4, 127.6, 126.7, 123.9, 123.5, 121.3, 119.7, 110.2, 88.4, 44.9, 40.2, 36.9, 20.4, 18.7, 14.6.

**HRMS** (ESI)  $m/z$ :  $[\text{M} + \text{Na}]^+$  Calculated for  $[\text{C}_{27}\text{H}_{25}\text{NO}_3\text{Na}^+]$ : 434.1727 found 434.1732.

**IR** (neat) 2975, 2923, 1719, 1681, 1597, 1476, 1356, 1227, 1113, 996, 896, 744, 691  $\text{cm}^{-1}$ .

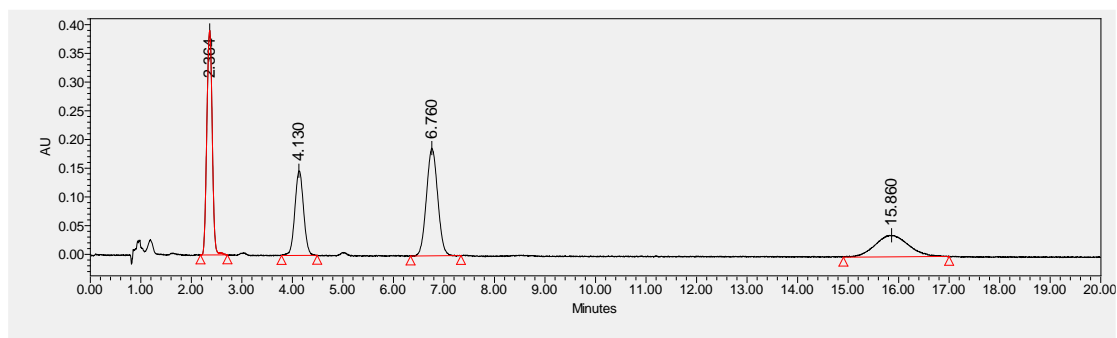

|   | Retention Time | Area    | % Area |
|---|----------------|---------|--------|
| 1 | 2.364          | 2896129 | 31.17  |
| 2 | 4.130          | 1761379 | 18.96  |
| 3 | 6.760          | 2904116 | 31.26  |
| 4 | 15.860         | 1728302 | 18.60  |

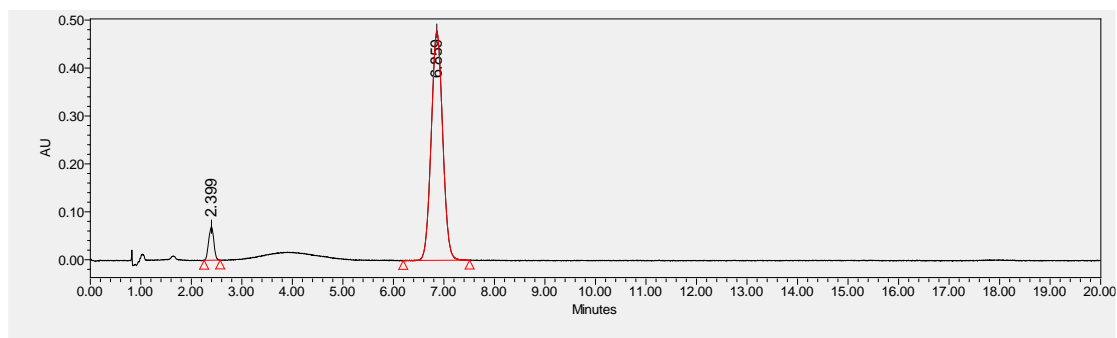

|   | Retention Time | Area    | % Area |
|---|----------------|---------|--------|
| 1 | 2.399          | 492890  | 6.15   |
| 2 | 6.859          | 7521287 | 93.85  |

**(2R,3S)-1'-ethyl-6'-methoxy-3-(2-oxo-2-phenylethyl)-3H-spiro[benzofuran-2,3'-indolin]-2'-one (C9):**

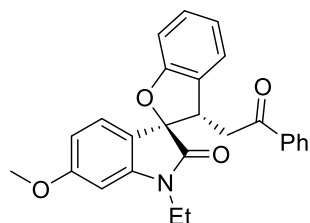

White solid, 69% yield, 94:6 er, 78:22 dr, m.p. 74-75 °C. Reacted for 96 h.

**SFC** Daicel Chiralcel OD-3, CO<sub>2</sub>/MeOH = 85/15, 1.5 mL/min, λ = 240 nm, t<sub>1</sub> = 3.90 min, t<sub>2</sub> = 4.25 min, t<sub>3</sub> = 6.23 min, t<sub>4</sub> = 7.98 min.

**minor product**

[α]<sub>D</sub><sup>20</sup> = -48.0 (c = 0.05, in CH<sub>2</sub>Cl<sub>2</sub>).

**<sup>1</sup>H NMR** (400 MHz, Chloroform-*d*) δ 7.98 – 7.81 (m, 2H), 7.54 (t, *J* = 7.4 Hz, 1H), 7.42 (t, *J* = 7.7 Hz, 2H), 7.24 – 7.17 (m, 3H), 6.96 (t, *J* = 7.3 Hz, 1H), 6.90 (d, *J* = 8.0 Hz, 1H), 6.52 (dd, *J* = 8.2, 2.2 Hz, 1H), 6.44 (d, *J* = 2.1 Hz, 1H), 4.42 (dd, *J* = 9.2, 4.9 Hz, 1H), 3.94 (dd, *J* = 18.4, 9.3 Hz, 1H), 3.83 (s, 3H), 3.70 (dq, *J* = 14.6, 7.3 Hz, 1H), 3.51 (dq, *J* = 14.3, 7.2 Hz, 1H), 3.39 (dd, *J* = 18.4, 5.0 Hz, 1H), 1.19 (t, *J* = 7.2 Hz, 3H).

**<sup>13</sup>C NMR** (101 MHz, Chloroform-*d*) δ 198.4, 173.3, 161.9, 158.9, 144.2, 136.6, 133.4, 129.4, 129.1, 128.7, 128.2, 124.5, 124.4, 122.7, 121.5, 110.4, 106.7, 96.9, 87.6, 55.7, 46.3, 41.2, 34.9, 12.6.

**HRMS** (ESI) *m/z*: [M + Na]<sup>+</sup> Calculated for [C<sub>26</sub>H<sub>23</sub>NO<sub>4</sub>Na<sup>+</sup>]: 436.1519 found 436.1517.

**IR** (neat) 2932, 1726, 1682, 1624, 1504, 1477, 1379, 1217, 1097, 994, 892, 747, 691 cm<sup>-1</sup>.

**major product**

[α]<sub>D</sub><sup>21</sup> = -41.6 (c = 0.31, in CH<sub>2</sub>Cl<sub>2</sub>).

**<sup>1</sup>H NMR** (400 MHz, Chloroform-*d*) δ 7.65 (d, *J* = 7.6 Hz, 2H), 7.48 (t, *J* = 7.4 Hz, 1H), 7.34 (t, *J* = 7.7 Hz, 2H), 7.23 – 7.21 (m, 2H), 7.02 – 6.93 (m, 2H), 6.87 (d, *J* = 8.2 Hz, 1H), 6.28 (d, *J* = 2.0 Hz, 1H), 6.22 (dd, *J* = 8.2, 2.1 Hz, 1H), 4.61 (t, *J* = 7.6 Hz, 1H), 3.88 (dq, *J* = 14.4, 7.2 Hz, 1H), 3.75 – 3.68 (m, 1H), 3.66 (s, 3H), 3.44 (d, *J* = 7.8 Hz, 2H), 1.37 (t, *J* = 7.2 Hz, 3H).

**<sup>13</sup>C NMR** (101 MHz, Chloroform-*d*) δ 197.1, 175.6, 162.0, 158.8, 145.3, 136.4, 133.2, 129.0, 128.9, 128.5, 127.8, 126.0, 123.9, 121.3, 117.9, 110.2, 105.7, 97.0, 89.0, 55.6, 44.5, 40.4, 35.1, 12.5.

**HRMS** (ESI) *m/z*: [M + Na]<sup>+</sup> Calculated for [C<sub>26</sub>H<sub>23</sub>NO<sub>4</sub>Na<sup>+</sup>]: 436.1519 found 436.1519.

**IR** (neat) 3059, 2933, 1726, 1620, 1455, 1378, 1216, 1098, 990, 884, 749, 693 cm<sup>-1</sup>.

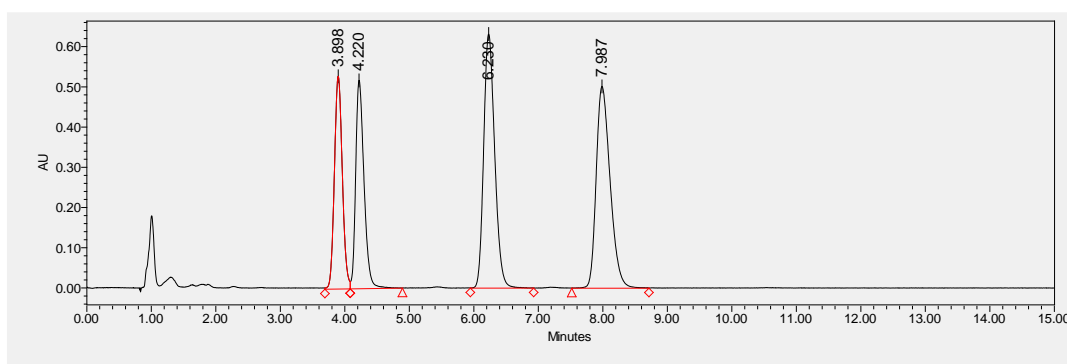

|   | Retention Time | Area    | % Area |
|---|----------------|---------|--------|
| 1 | 3.898          | 4525277 | 18.68  |
| 2 | 4.220          | 4661365 | 19.25  |
| 3 | 6.230          | 7505177 | 30.99  |
| 4 | 7.987          | 7527401 | 31.08  |

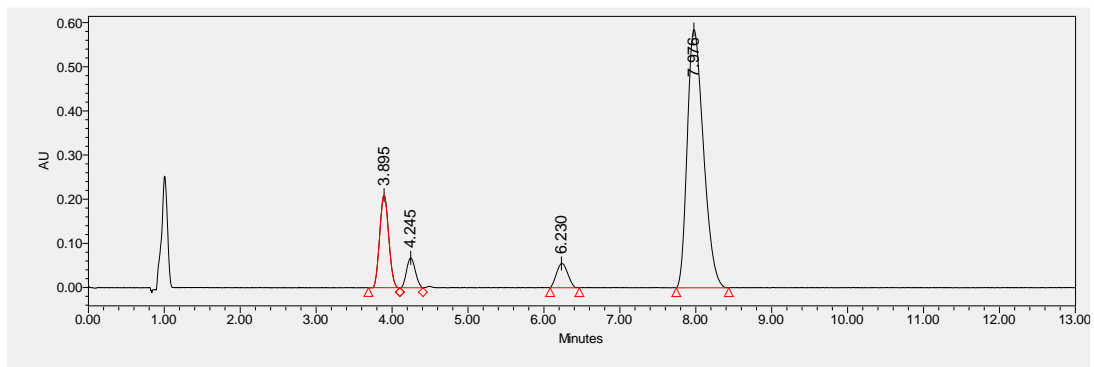

|   | Retention Time | Area    | % Area |
|---|----------------|---------|--------|
| 1 | 3.895          | 1726842 | 15.02  |
| 2 | 4.245          | 537958  | 4.68   |
| 3 | 6.230          | 565153  | 4.92   |
| 4 | 7.976          | 8664460 | 75.38  |

**(2*R*,3*S*)-1'-ethyl-6'-fluoro-3-(2-oxo-2-phenylethyl)-3*H*-spiro[benzofuran-2,3'-indolin]-2'-one (C10):**

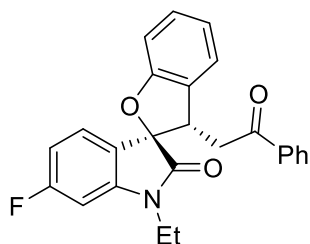

Yellow solid, 84% yield, 91:9 er, >19:1 dr, m.p. 59-61 °C,  $[\alpha]_D^{20} = -40.8$  (c = 0.66, in CH<sub>2</sub>Cl<sub>2</sub>). Reacted for 96 h.

**SFC** Daicel Chiralcel OD-3, CO<sub>2</sub>/MeOH = 85/15, 1.5 mL/min,  $\lambda = 240$  nm,  $t_1 = 5.75$  min,  $t_2 = 6.58$  min.

**<sup>1</sup>H NMR** (400 MHz, Chloroform-*d*)  $\delta$  7.65 (d,  $J = 7.4$  Hz, 2H), 7.50 (t,  $J = 7.4$  Hz, 1H), 7.35 (t,  $J = 7.7$  Hz, 2H), 7.24 – 7.20 (m, 2H), 7.02 – 6.96 (m, 2H), 6.88 (d,  $J = 8.0$  Hz, 1H), 6.51 – 6.37 (m, 2H), 4.61 (dd,  $J = 10.5, 4.6$  Hz, 1H), 3.95 – 3.86 (m, 1H), 3.77 – 3.66 (m, 1H), 3.56 – 3.37 (m, 2H), 1.38 (t,  $J = 7.2$  Hz, 3H).

**<sup>13</sup>C NMR** (101 MHz, Chloroform-*d*)  $\delta$  197.0, 175.41, 164.4 (d,  $J = 248.1$  Hz), 158.6, 145.7 (d,  $J = 11.9$  Hz), 136.1, 133.4, 129.1, 128.6, 128.5, 127.6, 126.2 (d,  $J = 10.1$  Hz), 123.9, 121.5, 121.4 (d,  $J = 3.1$  Hz), 110.3, 108.1 (d,  $J = 22.6$  Hz), 97.8 (d,  $J = 27.6$  Hz), 88.6, 44.5, 40.3, 35.3, 12.3.

**<sup>19</sup>F NMR** (376 MHz, Chloroform-*d*)  $\delta$  -108.44.

**HRMS** (ESI)  $m/z$ : [M + Na]<sup>+</sup> Calculated for [C<sub>25</sub>H<sub>20</sub>FNO<sub>3</sub>Na<sup>+</sup>]: 424.1319 found 424.1318.

**IR** (neat) 3062, 2982, 1732, 1681, 1612, 1453, 1379, 1354, 1200, 1088, 840, 749, 694 cm<sup>-1</sup>.

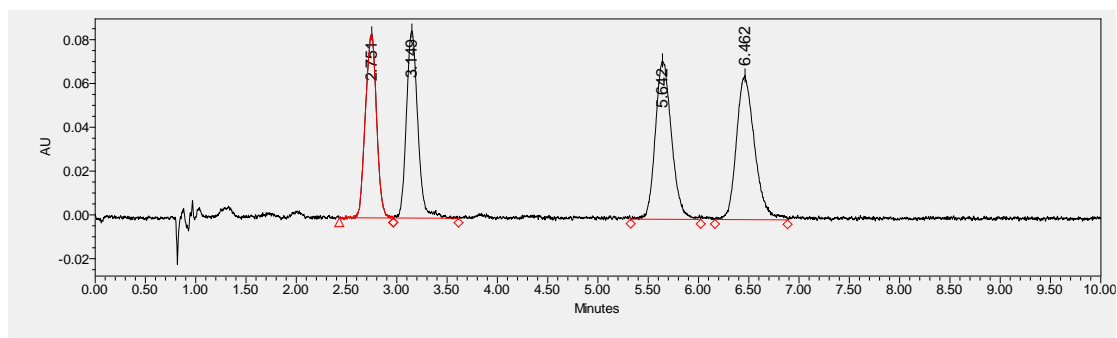

|   | Retention Time | Area   | % Area |
|---|----------------|--------|--------|
| 1 | 2.751          | 647713 | 21.93  |
| 2 | 3.149          | 672585 | 22.77  |
| 3 | 5.642          | 808263 | 27.36  |
| 4 | 6.462          | 825613 | 27.95  |

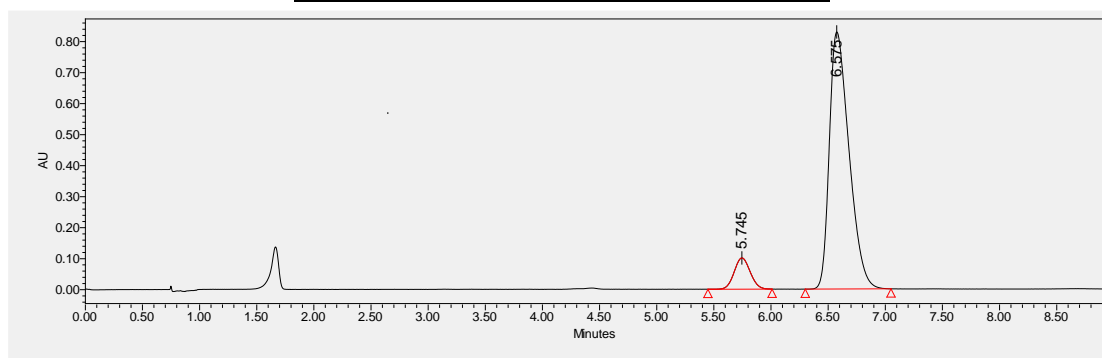

|   | Retention Time | Area    | % Area |
|---|----------------|---------|--------|
| 1 | 5.745          | 979613  | 8.98   |
| 2 | 6.575          | 9934344 | 91.02  |



**(2*R*,3*S*)-6'-chloro-1'-ethyl-3-(2-oxo-2-phenylethyl)-3*H*-spiro[benzofuran-2,3'-indolin]-2'-one (C11):**

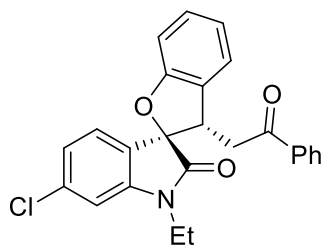

Yellow solid, 99% yield, 92:8 er, >19:1 dr, m.p. 68-70 °C,  $[\alpha]_D^{20} = -49.3$  ( $c = 0.82$ , in  $\text{CH}_2\text{Cl}_2$ ). Reacted for 108 h.

**SFC** Daicel Chiralcel OD-3,  $\text{CO}_2/\text{MeOH} = 85/15$ , 1.5 mL/min,  $\lambda = 240$  nm,  $t_1 = 7.24$  min,  $t_2 = 8.44$  min.

**$^1\text{H NMR}$**  (400 MHz, Chloroform-*d*)  $\delta$  7.64 (d,  $J = 7.3$  Hz, 2H), 7.50 (t,  $J = 7.4$  Hz, 1H), 7.36 (t,  $J = 7.7$  Hz, 2H), 7.24 – 7.20 (m, 2H), 7.00 – 6.95 (m, 2H), 6.87 (d,  $J = 8.0$  Hz, 1H), 6.72 – 6.70 (m, 2H), 4.61 (dd,  $J = 10.8, 4.4$  Hz, 1H), 3.95 – 3.86 (m, 1H), 3.75 – 3.66 (m, 1H), 3.57 – 3.35 (m, 2H), 1.38 (t,  $J = 7.2$  Hz, 3H).

**$^{13}\text{C NMR}$**  (101 MHz, Chloroform-*d*)  $\delta$  197.0, 175.1, 158.6, 145.0, 136.4, 136.1, 133.4, 129.2, 128.6, 128.4, 127.7, 125.8, 124.2, 123.9, 121.9, 121.6, 110.3, 109.6, 88.5, 44.6, 40.2, 35.3, 12.3.

**HRMS** (ESI)  $m/z$ :  $[\text{M} + \text{Na}]^+$  Calculated for  $[\text{C}_{25}\text{H}_{20}^{35}\text{ClNO}_3\text{Na}]^+$ : 440.1024 found 440.1029.

**HRMS** (ESI)  $m/z$ :  $[\text{M} + \text{Na}]^+$  Calculated for  $[\text{C}_{25}\text{H}_{20}^{37}\text{ClNO}_3\text{Na}]^+$ : 442.0994 found 442.1000.

**IR** (neat) 3062, 2981, 2936, 1733, 1682, 1605, 1483, 1369, 1230, 1011, 750, 693  $\text{cm}^{-1}$ .

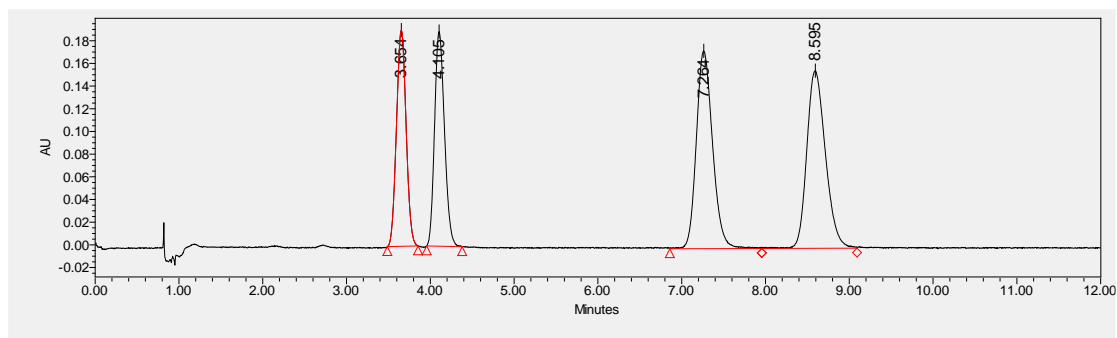

|   | Retention Time | Area    | % Area |
|---|----------------|---------|--------|
| 1 | 3.654          | 1523755 | 19.39  |
| 2 | 4.105          | 1554283 | 19.78  |
| 3 | 7.264          | 2354933 | 29.97  |
| 4 | 8.595          | 2425684 | 30.87  |

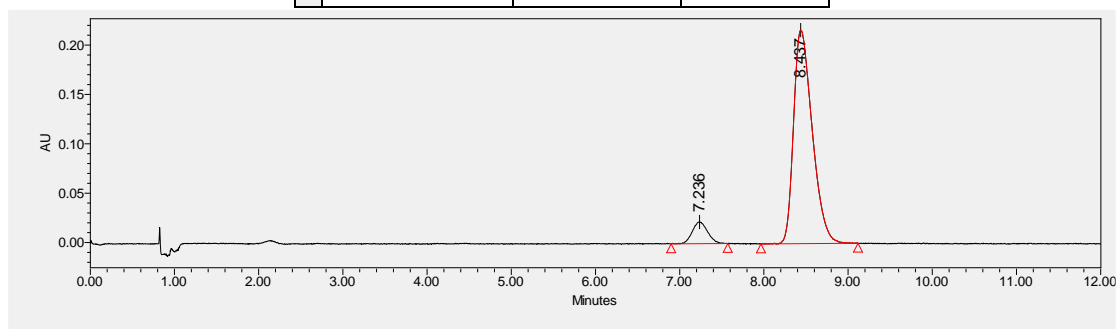

|   | Retention Time | Area    | % Area |
|---|----------------|---------|--------|
| 1 | 7.236          | 279292  | 7.74   |
| 2 | 8.437          | 3328450 | 92.26  |

**(2*R*,3*S*)-6'-bromo-1'-ethyl-3-(2-oxo-2-phenylethyl)-3*H*-spiro[benzofuran-2,3'-indolin]-2'-one (C12):**

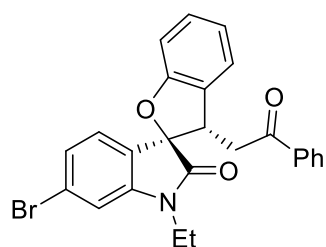

Yellow solid, 93% yield, 93:7 er, >19:1 dr, m.p. 70-73 °C,  $[\alpha]_D^{20} = -43.2$  ( $c = 0.94$ , in  $\text{CH}_2\text{Cl}_2$ ). Reacted for 108 h.

**SFC** Daicel Chiralcel OD-3,  $\text{CO}_2/\text{MeOH} = 85/15$ , 1.5 mL/min,  $\lambda = 240$  nm,  $t_1 = 8.23$  min,  $t_2 = 9.76$  min.

**$^1\text{H NMR}$**  (400 MHz, Chloroform-*d*)  $\delta$  7.68 – 7.61 (m, 2H), 7.51 (t,  $J = 7.4$  Hz, 1H), 7.36 (t,  $J = 7.7$  Hz, 2H), 7.24 – 7.20 (m, 2H), 6.98 (t,  $J = 7.4$  Hz, 1H), 6.93 – 6.83 (m, 4H), 4.61 (dd,  $J = 10.8, 4.4$  Hz, 1H), 3.95 – 3.86 (m, 1H), 3.69 (dt,  $J = 14.4, 7.2$  Hz, 1H), 3.56 – 3.36 (m, 2H), 1.38 (t,  $J = 7.2$  Hz, 3H).

**$^{13}\text{C NMR}$**  (101 MHz, Chloroform-*d*)  $\delta$  197.0, 174.9, 158.6, 145.1, 136.1, 133.4, 129.2, 128.6, 128.4, 127.7, 126.0, 124.8, 124.7, 124.4, 123.9, 121.6, 112.4, 110.3, 88.6, 44.6, 40.2, 35.3, 12.3.

**HRMS** (ESI)  $m/z$ :  $[\text{M} + \text{Na}]^+$  Calculated for  $[\text{C}_{25}\text{H}_{20}^{79}\text{BrNO}_3\text{Na}^+]$ : 484.0519 found 484.0524.

**HRMS** (ESI)  $m/z$ :  $[\text{M} + \text{Na}]^+$  Calculated for  $[\text{C}_{25}\text{H}_{20}^{81}\text{BrNO}_3\text{Na}^+]$ : 486.0498 found 486.0503.

**IR** (neat) 3061, 2981, 1733, 1682, 1601, 1482, 1429, 1230, 1000, 750, 693  $\text{cm}^{-1}$ .

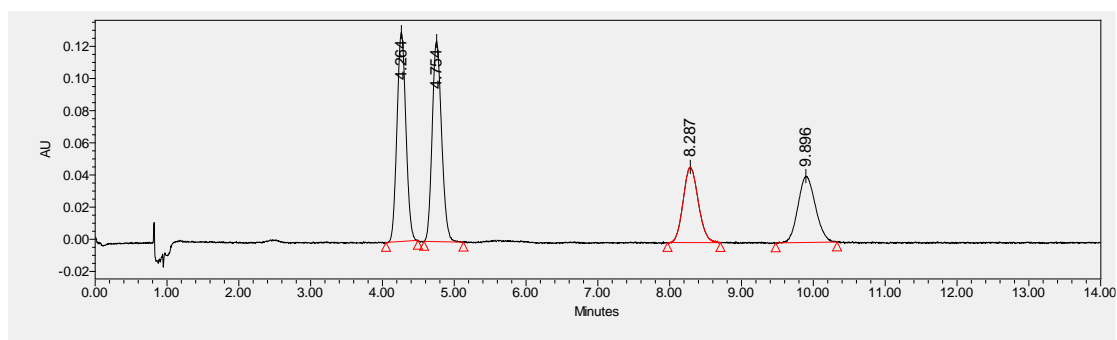

|   | Retention Time | Area    | % Area |
|---|----------------|---------|--------|
| 1 | 4.264          | 1118798 | 30.82  |
| 2 | 4.754          | 1133202 | 31.21  |
| 3 | 8.287          | 684341  | 18.85  |
| 4 | 9.896          | 694283  | 19.12  |

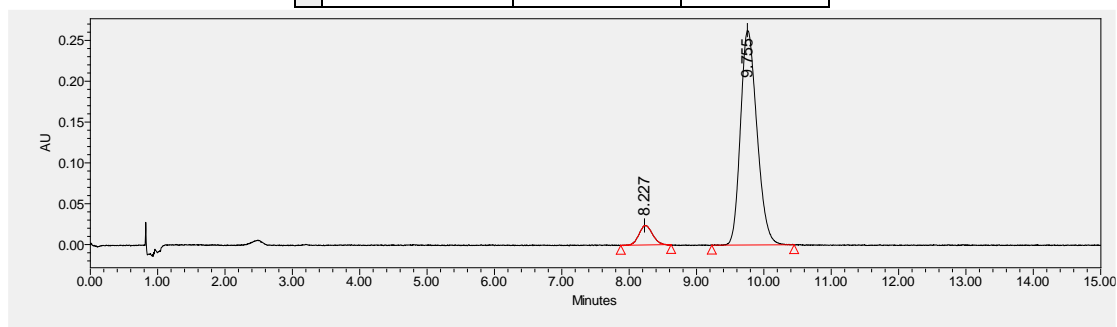

|   | Retention Time | Area    | % Area |
|---|----------------|---------|--------|
| 1 | 8.227          | 333171  | 6.95   |
| 2 | 9.755          | 4460394 | 93.05  |

**(2R,3S)-1'-ethyl-7'-methyl-3-(2-oxo-2-phenylethyl)-3H-spiro[benzofuran-2,3'-indolin]-2'-one (C13):**

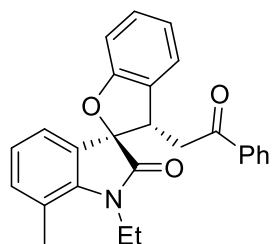

Yellow solid, 87% yield, 93:7 er, >19:1 dr, m.p. 148-152 °C,  $[\alpha]_D^{20} = -13.9$  ( $c = 0.77$ , in  $\text{CH}_2\text{Cl}_2$ ). Reacted for 108 h.

**SFC** Daicel Chiralcel OD-3,  $\text{CO}_2/\text{MeOH} = 85/15$ , 1.5 mL/min,  $\lambda = 240$  nm,  $t_1 = 6.18$  min,  $t_2 = 8.54$  min.

**$^1\text{H NMR}$**  (400 MHz, Chloroform- $d$ )  $\delta$  7.62 (d,  $J = 7.4$  Hz, 2H), 7.47 (t,  $J = 7.4$  Hz, 1H), 7.33 (t,  $J = 7.7$  Hz, 2H), 7.22 – 7.18 (m, 2H), 6.96 (t,  $J = 7.4$  Hz, 1H), 6.93 – 6.81 (m, 3H), 6.67 (t,  $J = 7.5$  Hz, 1H), 4.73 – 4.57 (m, 1H), 4.10 – 3.94 (m, 2H), 3.46 – 3.36 (m, 2H), 2.39 (s, 3H), 1.39 (t,  $J = 7.1$  Hz, 3H).

**$^{13}\text{C NMR}$**  (101 MHz, Chloroform- $d$ )  $\delta$  197.0, 176.2, 158.9, 141.4, 136.3, 134.5, 133.2, 129.0, 128.9, 128.5, 127.7, 126.6, 123.9, 122.7, 122.1, 121.3, 120.0, 110.2, 88.4, 44.8, 40.1, 37.0, 18.9, 14.7.

**HRMS** (ESI)  $m/z$ :  $[\text{M} + \text{Na}]^+$  Calculated for  $[\text{C}_{26}\text{H}_{23}\text{NO}_3\text{Na}^+]$ : 420.1570 found 420.1570.

**IR** (neat) 2924, 1725, 1683, 1599, 1455, 1361, 1227, 886, 751, 691  $\text{cm}^{-1}$ .

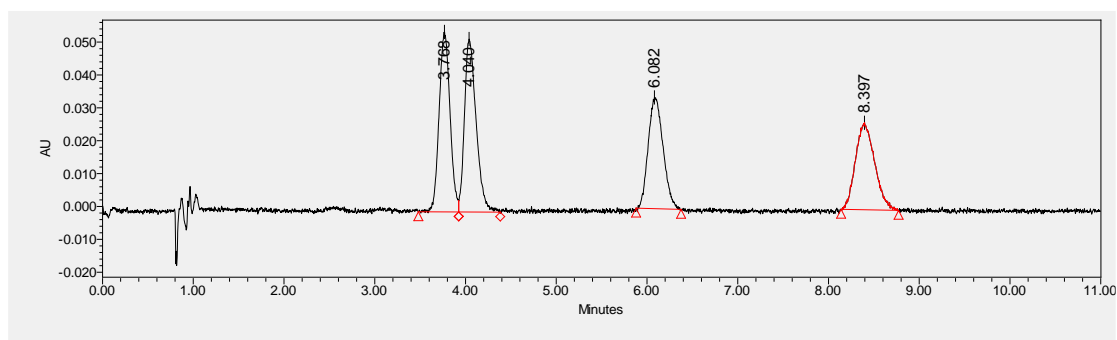

|   | Retention Time | Area   | % Area |
|---|----------------|--------|--------|
| 1 | 3.768          | 457802 | 26.88  |
| 2 | 4.040          | 471577 | 27.69  |
| 3 | 6.082          | 386722 | 22.70  |
| 4 | 8.397          | 387240 | 22.73  |

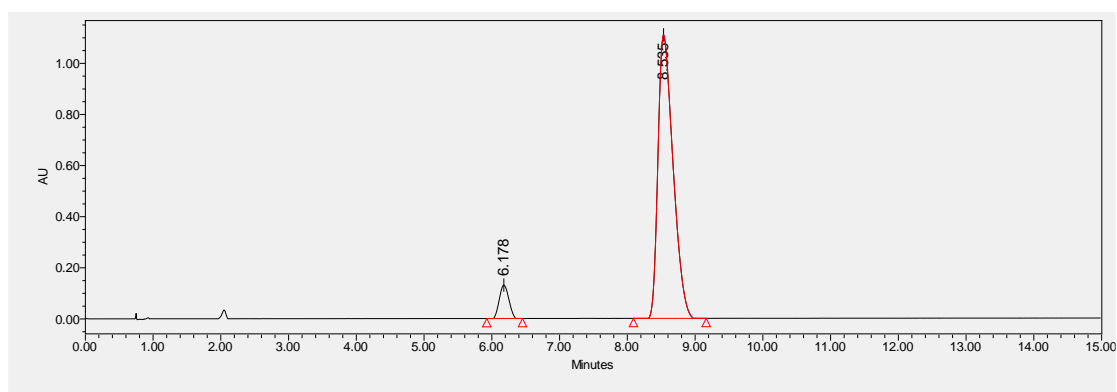

|   | Retention Time | Area     | % Area |
|---|----------------|----------|--------|
| 1 | 6.178          | 1266387  | 6.90   |
| 2 | 8.535          | 17082968 | 93.10  |

**(2*R*,3*S*)-7'-bromo-1'-ethyl-3-(2-oxo-2-phenylethyl)-3*H*-spiro[benzofuran-2,3'-indolin]-2'-one (C14):**

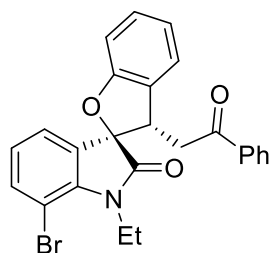

Yellow solid, 99% yield, 92.5:7.5 er, >19:1 dr, m.p. 63-67 °C,  $[\alpha]_D^{20}$  = 4.2 ( $c = 0.82$ , in  $\text{CH}_2\text{Cl}_2$ ). Reacted for 120 h .

**SFC** Daicel Chiralcel OD-3,  $\text{CO}_2/\text{MeOH} = 85/15$ , 1.5 mL/min,  $\lambda = 240$  nm,  $t_1 = 9.55$  min,  $t_2 = 10.51$  min.

**$^1\text{H NMR}$**  (400 MHz, Chloroform-*d*)  $\delta$  7.69 – 7.63 (m, 2H), 7.49 (t,  $J = 7.4$  Hz, 1H), 7.35 (t,  $J = 7.7$  Hz, 2H), 7.25 – 7.17 (m, 3H), 7.02 – 6.95 (m, 2H), 6.88 (d,  $J = 7.9$  Hz, 1H), 6.65 – 6.55 (m, 1H), 4.64 (dd,  $J = 10.4, 4.8$  Hz, 1H), 4.30 – 4.21 (m, 2H), 3.55 – 3.30 (m, 2H), 1.45 (t,  $J = 7.1$  Hz, 3H).

**$^{13}\text{C NMR}$**  (101 MHz, Chloroform-*d*)  $\delta$  196.6, 175.9, 158.6, 141.4, 136.4, 136.1, 133.4, 129.2, 129.1, 128.6, 128.4, 127.7, 123.9, 123.8, 123.2, 121.6, 110.3, 102.7, 88.0, 45.0, 40.1, 36.8, 14.8.

**HRMS** (ESI)  $m/z$ :  $[\text{M} + \text{Na}]^+$  Calculated for  $[\text{C}_{25}\text{H}_{20}^{79}\text{BrNO}_3\text{Na}^+]$ : 484.0519 found 484.0522.

**HRMS** (ESI)  $m/z$ :  $[\text{M} + \text{Na}]^+$  Calculated for  $[\text{C}_{25}\text{H}_{20}^{81}\text{BrNO}_3\text{Na}^+]$ : 486.0498 found 486.0502.

**IR** (neat) 3060, 2978, 1731, 1681, 1455, 1355, 1232, 1114, 859, 742, 693  $\text{cm}^{-1}$ .

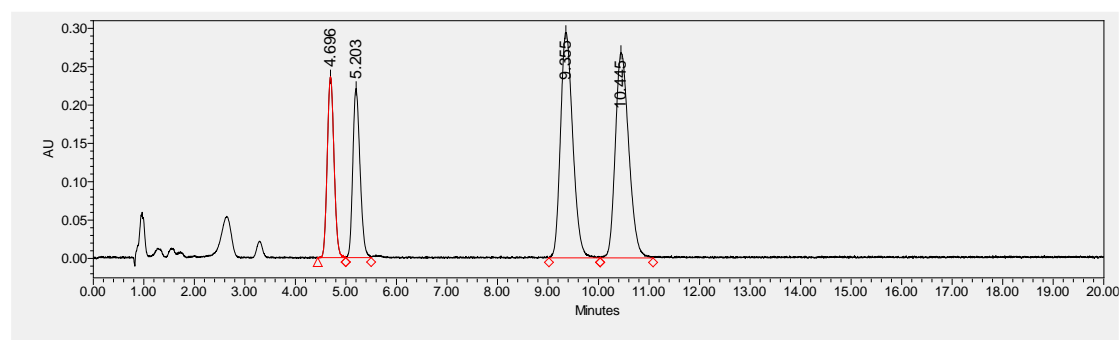

|   | Retention Time | Area    | % Area |
|---|----------------|---------|--------|
| 1 | 4.696          | 2202111 | 15.42  |
| 2 | 5.203          | 2186807 | 15.31  |
| 3 | 9.355          | 4937596 | 34.58  |
| 4 | 10.445         | 4952791 | 34.69  |

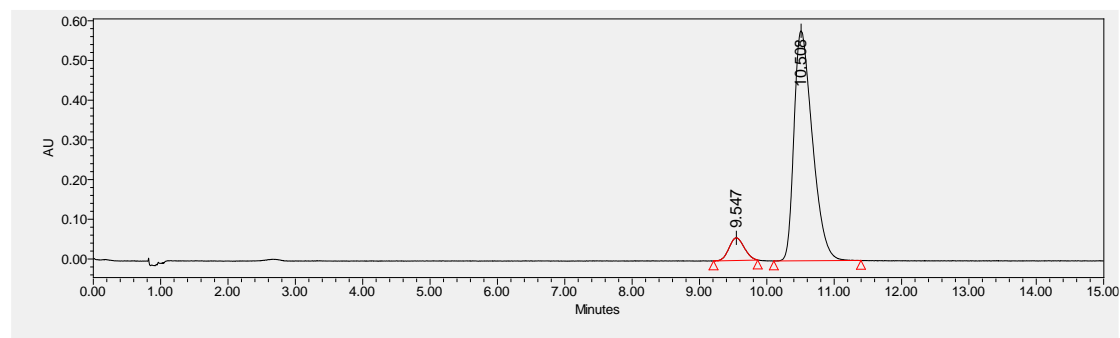

|   | Retention Time | Area     | % Area |
|---|----------------|----------|--------|
| 1 | 9.547          | 889187   | 7.51   |
| 2 | 10.508         | 10954733 | 92.49  |

**(2*R*,3*S*)-3-(2-oxo-2-phenylethyl)-3*H*-spiro[benzofuran-2,3'-indolin]-2'-one (C15):**

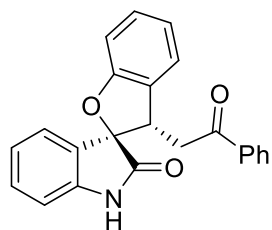

White solid, 99% yield, 80:20 er, 83:17 dr, m.p. 86-87 °C, Reacted for 120 h.

**SFC** Daicel Chiralpak AS-3, CO<sub>2</sub>/MeOH = 80/20, 1.5 mL/min, λ = 240 nm, t<sub>1</sub> = 3.15 min, t<sub>2</sub> = 5.19 min, t<sub>3</sub> = 14.73 min, t<sub>4</sub> = 18.65 min.

**minor product**

[α]<sub>D</sub><sup>20</sup> = -125.0 (c = 0.08, in CH<sub>2</sub>Cl<sub>2</sub>).

**<sup>1</sup>H NMR** (400 MHz, Chloroform-*d*) δ 7.91 (d, *J* = 8.2 Hz, 2H), 7.64 (d, *J* = 23.2 Hz, 1H), 7.53 (t, *J* = 7.4 Hz, 1H), 7.41 (t, *J* = 7.7 Hz, 2H), 7.31 – 7.27 (m, 1H), 7.26 – 7.19 (m, 3H), 7.04 (t, *J* = 7.6 Hz, 1H), 6.97 (t, *J* = 7.5 Hz, 1H), 6.92 (d, *J* = 8.0 Hz, 1H), 6.83 (d, *J* = 7.7 Hz, 1H), 4.48 (dd, *J* = 8.4, 5.6 Hz, 1H), 3.94 – 3.86 (m, 1H), 3.45 (dd, *J* = 18.4, 5.4 Hz, 1H).

**<sup>13</sup>C NMR** (101 MHz, Chloroform-*d*) δ 198.6, 174.9, 158.8, 140.4, 136.6, 133.5, 130.6, 130.6, 129.2, 129.2, 128.8, 128.2, 124.6, 124.0, 123.6, 121.8, 110.5, 110.4, 87.9, 46.4, 41.2.

**HRMS** (ESI) *m/z*: [M + Na]<sup>+</sup> Calculated for [C<sub>23</sub>H<sub>17</sub>NO<sub>3</sub>Na<sup>+</sup>]: 378.1101 found 378.1105.

**IR** (neat) 3254, 2923, 1723, 1682, 1620, 1473, 1398, 1234, 1184, 1109, 995, 745, 686, 623 cm<sup>-1</sup>.

**major product**

[α]<sub>D</sub><sup>20</sup> = -70.1 (c = 0.53, in CH<sub>2</sub>Cl<sub>2</sub>).

**<sup>1</sup>H NMR** (400 MHz, Chloroform-*d*) δ 8.55 (d, *J* = 43.5 Hz, 1H), 7.67 (d, *J* = 7.3 Hz, 2H), 7.48 (t, *J* = 7.4 Hz, 1H), 7.34 (t, *J* = 7.7 Hz, 2H), 7.25 – 7.19 (m, 2H), 7.08 (t, *J* = 7.9 Hz, 2H), 6.98 (t, *J* = 7.4 Hz, 1H), 6.91 (d, *J* = 8.1 Hz, 1H), 6.83 – 6.75 (m, 2H), 4.68 (t, *J* = 7.4 Hz, 1H), 3.52 – 3.49 (m, 2H).

**<sup>13</sup>C NMR** (101 MHz, Chloroform-*d*) δ 197.6, 177.5, 158.8, 141.7, 136.3, 133.4, 130.7, 129.1, 128.7, 128.6, 127.8, 126.0, 125.2, 124.1, 122.4, 121.5, 111.0, 110.3, 89.3, 44.3, 40.7.

**HRMS** (ESI) *m/z*: [M + Na]<sup>+</sup> Calculated for [C<sub>23</sub>H<sub>17</sub>NO<sub>3</sub>Na<sup>+</sup>]: 378.1101 found 378.1104.

**IR** (neat) 3263, 3059, 1728, 1679, 1618, 1471, 1333, 1235, 1189, 995, 741, 686, 621 cm<sup>-1</sup>.

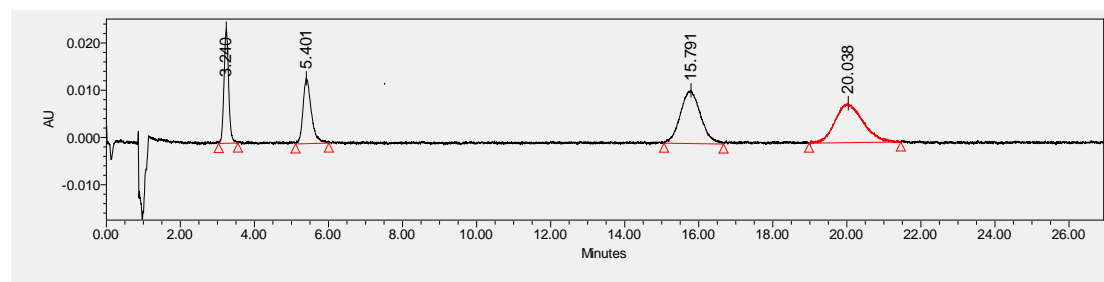

|   | Retention Time | Area   | % Area |
|---|----------------|--------|--------|
| 1 | 3.240          | 209840 | 16.39  |
| 2 | 5.401          | 216964 | 16.94  |
| 3 | 15.791         | 423866 | 33.10  |
| 4 | 20.038         | 429826 | 33.57  |

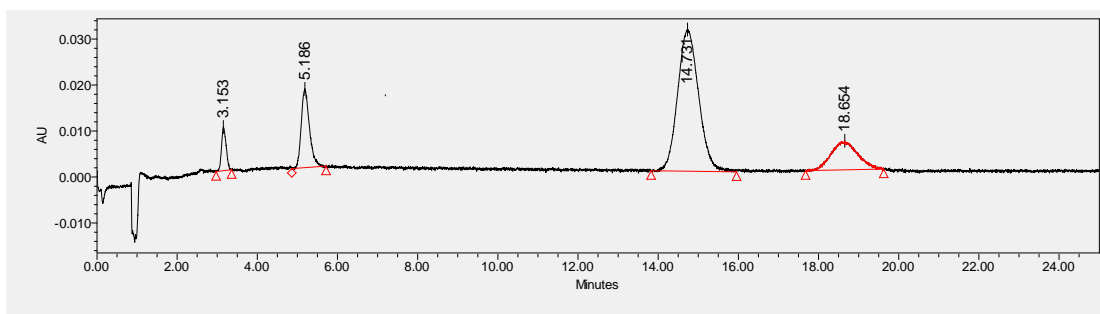

|   | Retention Time | Area    | % Area |
|---|----------------|---------|--------|
| 1 | 3.153          | 76251   | 4.42   |
| 2 | 5.186          | 244225  | 14.15  |
| 3 | 14.731         | 1121141 | 64.96  |
| 4 | 18.654         | 284238  | 16.47  |

**(2R,3S)-1'-methyl-3-(2-oxo-2-phenylethyl)-3H-spiro[benzofuran-2,3'-indolin]-2'-one (C16):**

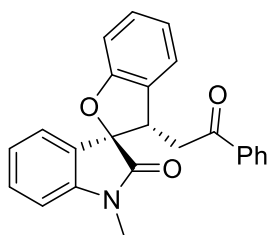

White solid, 98% yield, 89:11 er, >19:1 dr, m.p. 151-153 °C,  $[\alpha]^{20}_D = -36.7$  (c = 0.72, in CH<sub>2</sub>Cl<sub>2</sub>). Reacted for 108 h.

**SFC** Daicel Chiralcel OD-3, CO<sub>2</sub>/MeOH = 85/15, 1.5 mL/min,  $\lambda = 240$  nm,  $t_1 = 3.31$  min,  $t_2 = 8.19$  min.

**<sup>1</sup>H NMR** (400 MHz, Chloroform-*d*)  $\delta$  7.67 – 7.59 (m, 2H), 7.47 (t,  $J = 7.4$  Hz, 1H), 7.33 (t,  $J = 7.7$  Hz, 2H), 7.24 – 7.20 (m, 2H), 7.14 (td,  $J = 7.8, 1.1$  Hz, 1H), 7.07 (d,  $J = 7.3$  Hz, 1H), 6.98 (t,  $J = 7.4$  Hz, 1H), 6.89 (d,  $J = 7.8$  Hz, 1H), 6.79 (t,  $J = 7.5$  Hz, 1H), 6.72 (d,  $J = 7.8$  Hz, 1H), 4.62 (dd,  $J = 9.5, 5.5$  Hz, 1H), 3.54 – 3.40 (m, 2H), 3.29 (s, 3H).

**<sup>13</sup>C NMR** (101 MHz, Chloroform-*d*)  $\delta$  197.3, 175.6, 158.8, 144.5, 136.3, 133.2, 130.7, 129.1, 128.7, 128.5, 125.6, 124.7, 124.0, 122.3, 121.4, 110.2, 108.8, 89.0, 44.5, 40.6, 26.6.

**HRMS** (ESI)  $m/z$ :  $[M + Na]^+$  Calculated for [C<sub>24</sub>H<sub>19</sub>NO<sub>3</sub>Na<sup>+</sup>]: 392.1257 found 392.1257.

**IR** (neat) 3058, 2932, 1728, 1682, 1609, 1472, 1369, 1241, 991, 751, 692 cm<sup>-1</sup>.

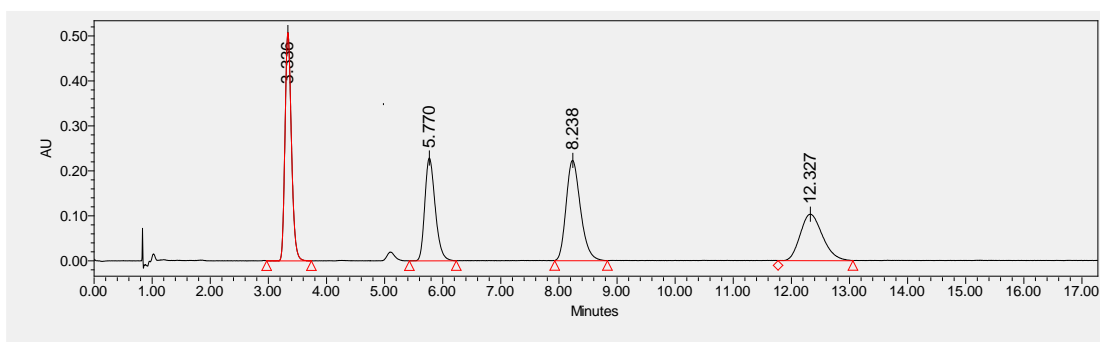

|   | Retention Time | Area    | % Area |
|---|----------------|---------|--------|
| 1 | 3.336          | 3896181 | 29.25  |
| 2 | 5.770          | 2839240 | 21.31  |
| 3 | 8.238          | 3828188 | 28.74  |
| 4 | 12.327         | 2756834 | 20.70  |

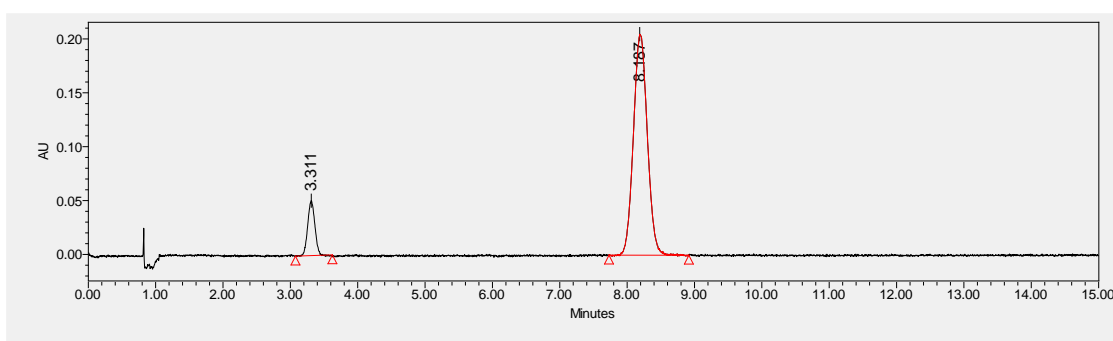

|   | Retention Time | Area    | % Area |
|---|----------------|---------|--------|
| 1 | 3.311          | 378948  | 11.41  |
| 2 | 8.187          | 2942201 | 88.59  |

**(2*R*,3*S*)-1'-isopropyl-3-(2-oxo-2-phenylethyl)-3*H*-spiro[benzofuran-2,3'-indolin]-2'-one (C17):**

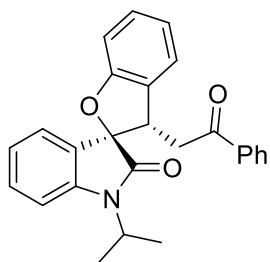

Yellow solid, 76% yield, 91.5:8.5 er, >19:1 dr, m.p. 65-67 °C,  $[\alpha]^{20}_D = -59.6$  (c = 0.44, in CH<sub>2</sub>Cl<sub>2</sub>). Reacted for 120 h.

**SFC** Daicel Chiralcel OD-3, CO<sub>2</sub>/MeOH = 85/15, 1.5 mL/min,  $\lambda = 240$  nm,  $t_1 = 2.51$  min,  $t_2 = 4.93$  min.

**<sup>1</sup>H NMR** (400 MHz, Chloroform-*d*)  $\delta$  7.62 (d,  $J = 7.4$  Hz, 2H), 7.47 (t,  $J = 7.4$  Hz, 1H), 7.32 (t,  $J = 7.7$  Hz, 2H), 7.22 (m, 2H), 7.11 – 7.04 (m, 2H), 6.98 (t,  $J = 7.4$  Hz, 1H), 6.87 (m, 2H), 6.75 (t,  $J = 7.5$  Hz, 1H), 4.79 –

4.60 (m, 2H), 3.45 (d,  $J = 7.9$  Hz, 2H), 1.56 (dd,  $J = 9.0, 7.1$  Hz, 6H).

**<sup>13</sup>C NMR** (101 MHz, Chloroform-*d*)  $\delta$  196.8, 175.0, 158.8, 143.1, 136.1, 133.1, 130.3, 128.9, 128.7, 128.4, 127.5, 125.9, 124.9, 123.7, 121.6, 121.2, 110.5, 110.1, 88.7, 44.5, 44.1, 40.2, 19.3, 19.0.

**HRMS** (ESI)  $m/z$ :  $[M + Na]^+$  Calculated for [C<sub>26</sub>H<sub>23</sub>NO<sub>3</sub>Na<sup>+</sup>]: 420.1570 found 420.1570.

**IR** (neat) 3059, 2979, 2935, 1725, 1682, 1605, 1474, 1359, 1241, 988, 752, 691 cm<sup>-1</sup>.

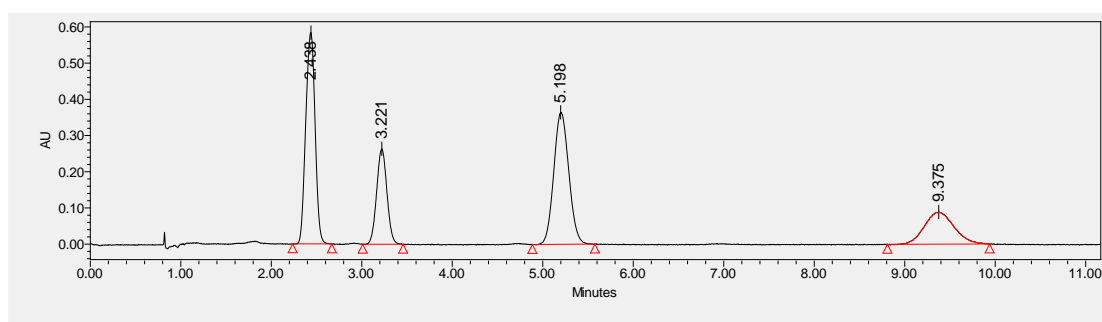

|   | Retention Time | Area    | % Area |
|---|----------------|---------|--------|
| 1 | 2.438          | 4187577 | 33.55  |
| 2 | 3.221          | 2075969 | 16.63  |
| 3 | 5.198          | 4208280 | 33.72  |
| 4 | 9.375          | 2009630 | 16.10  |

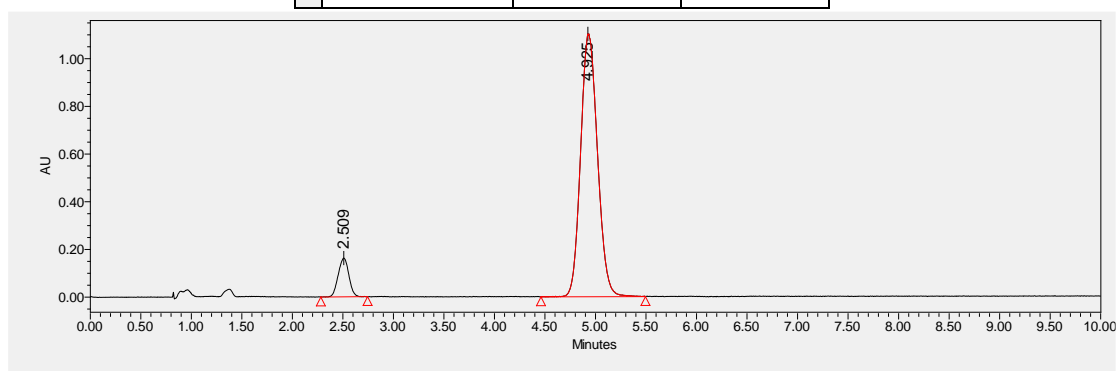

|   | Retention Time | Area     | % Area |
|---|----------------|----------|--------|
| 1 | 2.509          | 1190292  | 8.51   |
| 2 | 4.925          | 12800361 | 91.49  |



**(2*R*,3*S*)-1'-isobutyl-3-(2-oxo-2-phenylethyl)-3*H*-spiro[benzofuran-2,3'-indolin]-2'-one (C18):**

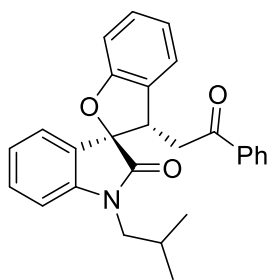

Yellow solid, 63% yield, 91:9 er, >19:1 dr, m.p. 57-58 °C,  $[\alpha]^{20}_D = -17.7$  ( $c = 0.35$ , in  $\text{CH}_2\text{Cl}_2$ ). Reacted for 120 h.

**SFC** Daicel Chiralcel OJ-3,  $\text{CO}_2/\text{MeOH} = 85/15$ , 1.5 mL/min,  $\lambda = 240$  nm,  $t_1 = 2.51$  min,  $t_2 = 4.93$  min.

**$^1\text{H}$  NMR** (400 MHz, Chloroform-*d*)  $\delta$  7.67 – 7.60 (m, 2H), 7.48 (t,  $J = 7.4$  Hz, 1H), 7.34 (t,  $J = 7.7$  Hz, 2H), 7.24 – 7.19 (m, 2H), 7.15 – 7.06 (m, 2H), 6.97 (t,  $J = 7.4$  Hz, 1H), 6.89 (d,  $J = 8.2$  Hz, 1H), 6.79 – 6.72 (m, 2H), 4.64 (t,  $J = 7.5$  Hz, 1H), 3.61 – 3.52 (m, 2H), 3.49 – 3.42 (m, 2H), 2.29 – 2.19 (m, 1H), 1.09 (d,  $J = 6.7$  Hz, 3H), 1.03 (d,  $J = 6.7$  Hz, 3H).

**$^{13}\text{C}$  NMR** (101 MHz, Chloroform-*d*)  $\delta$  197.0, 175.8, 158.9, 144.7, 136.4, 133.2, 130.5, 129.0, 128.9, 128.5, 127.7, 125.7, 124.9, 124.0, 122.0, 121.4, 110.3, 109.4, 88.9, 48.2, 44.3, 40.7, 27.5, 20.6.

**HRMS** (ESI)  $m/z$ :  $[\text{M} + \text{Na}]^+$  Calculated for  $[\text{C}_{27}\text{H}_{25}\text{NO}_3\text{Na}^+]$ : 434.1727 found 434.1729.

**IR** (neat) 3058, 2960, 1730, 1684, 1609, 1472, 1367, 1241, 993, 751, 694  $\text{cm}^{-1}$ .

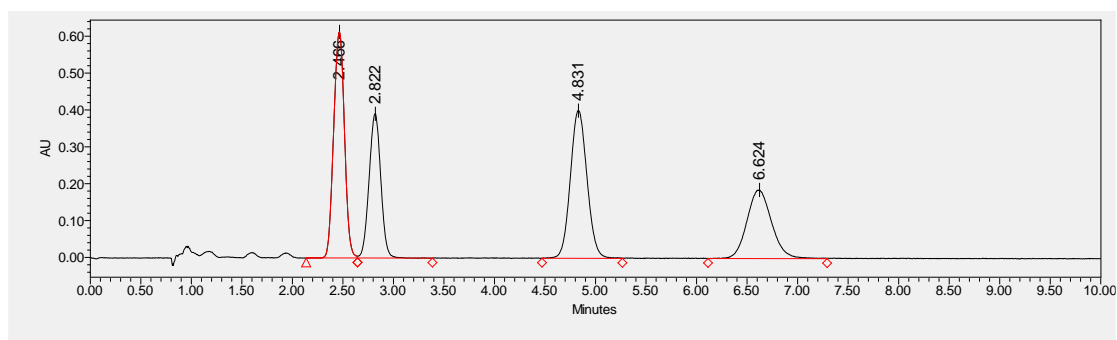

|   | Retention Time | Area    | % Area |
|---|----------------|---------|--------|
| 1 | 2.466          | 4550091 | 29.45  |
| 2 | 2.822          | 3148163 | 20.37  |
| 3 | 4.831          | 4594814 | 29.73  |
| 4 | 6.624          | 3159506 | 20.45  |

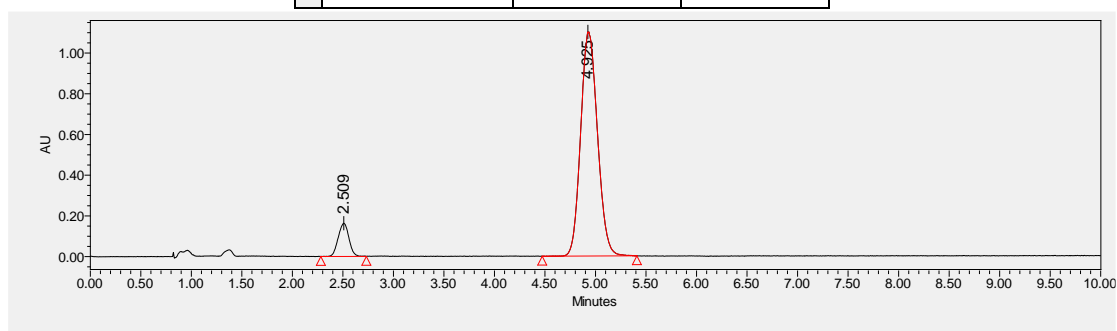

|   | Retention Time | Area     | % Area |
|---|----------------|----------|--------|
| 1 | 2.509          | 1206732  | 8.66   |
| 2 | 4.925          | 12733494 | 91.34  |

**(2*R*,3*S*)-1'-(cyclopropylmethyl)-3-(2-oxo-2-phenylethyl)-3*H*-spiro[benzofuran-2,3'-indolin]-2'-one (C19):**

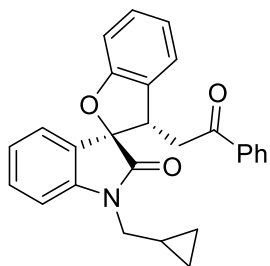

Yellow solid, 98% yield, 92:8 er, >19:1 dr, m.p. 58-61 °C,  $[\alpha]_D^{20} = -22.3$  ( $c = 0.90$ , in  $\text{CH}_2\text{Cl}_2$ ). Reacted for 120 h.

**SFC** Daicel Chiralcel OD-3,  $\text{CO}_2/\text{MeOH} = 85/15$ , 1.5 mL/min,  $\lambda = 240$  nm,  $t_1 = 3.48$  min,  $t_2 = 6.96$  min.

**$^1\text{H}$  NMR** (400 MHz, Chloroform-*d*)  $\delta$  7.66 – 7.59 (m, 2H), 7.51 – 7.44 (m, 1H), 7.33 (t,  $J = 7.7$  Hz, 2H), 7.22 (m, 2H), 7.14 (td,  $J = 7.8, 1.1$  Hz, 1H), 7.08 (d,  $J = 7.3$  Hz, 1H), 6.97 (t,  $J = 7.4$  Hz, 1H), 6.90 (d,  $J = 8.0$  Hz, 1H), 6.83 – 6.75 (m, 2H), 4.65 (t,  $J = 7.5$  Hz, 1H), 3.72 (dd,  $J = 14.5, 6.4$  Hz, 1H), 3.61 (dd,  $J = 14.5, 7.2$  Hz, 1H), 3.44 (d,  $J = 7.5$  Hz, 2H), 1.22-1.28 (m, 1H), 0.66 – 0.54 (m, 2H), 0.43-0.52 (d,  $J = 4.8$  Hz, 2H).

**$^{13}\text{C}$  NMR** (101 MHz, Chloroform-*d*)  $\delta$  197.0, 175.5, 158.9, 144.3, 136.4, 133.2, 130.6, 129.0, 128.9, 128.5, 127.7, 125.7, 124.9, 124.0, 122.1, 121.4, 110.3, 109.4, 89.0, 44.9, 44.5, 40.5, 9.5, 4.3, 4.1.

**HRMS** (ESI)  $m/z$ :  $[\text{M} + \text{Na}]^+$  Calculated for  $[\text{C}_{27}\text{H}_{23}\text{NO}_3\text{Na}]^+$ : 432.1570 found 432.1573.

**IR** (neat) 3060, 2919, 1729, 1683, 1608, 1476, 1364, 1239, 990, 752, 694  $\text{cm}^{-1}$ .

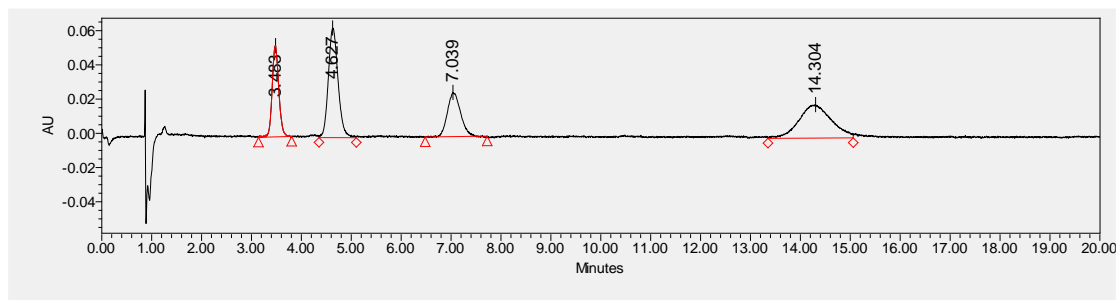

|   | Retention Time | Area   | % Area |
|---|----------------|--------|--------|
| 1 | 3.483          | 490536 | 18.06  |
| 2 | 4.627          | 868245 | 31.96  |
| 3 | 7.039          | 476084 | 17.53  |
| 4 | 14.304         | 881378 | 32.45  |

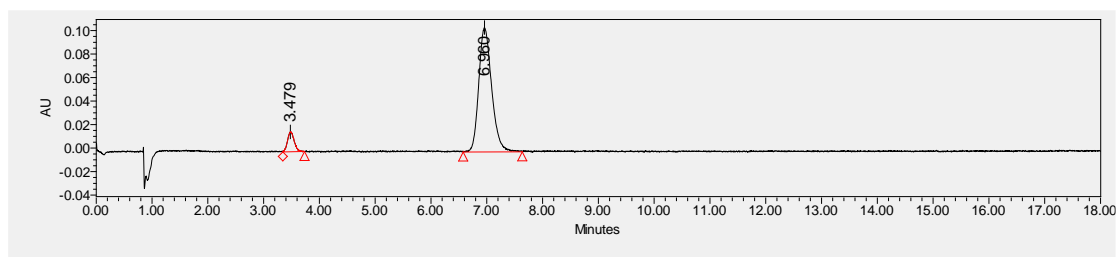

|   | Retention Time | Area    | % Area |
|---|----------------|---------|--------|
| 1 | 3.479          | 140454  | 7.63   |
| 2 | 6.960          | 1700488 | 92.37  |

**(2R,3S)-1'-allyl-3-(2-oxo-2-phenylethyl)-3H-spiro[benzofuran-2,3'-indolin]-2'-one (C20):**

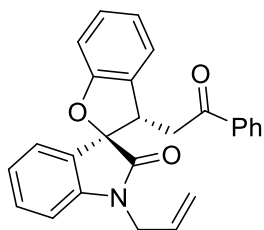

Yellow solid, 93% yield, 94:6 er, >19:1 dr, m.p. 138-140 °C,  $[\alpha]^{20}_D = -49.0$  (c = 0.70, in  $\text{CH}_2\text{Cl}_2$ ). Reacted for 120 h.

**SFC** Daicel Chiralcel OJ-3,  $\text{CO}_2/\text{MeOH} = 85/15$ , 1.5 mL/min,  $\lambda = 240$  nm,  $t_1 = 3.05$  min,  $t_2 = 7.24$  min.

**$^1\text{H}$  NMR** (400 MHz, Chloroform-*d*)  $\delta$  7.66 – 7.60 (m, 2H), 7.48 (t,  $J = 7.4$  Hz, 1H), 7.33 (t,  $J = 7.7$  Hz, 2H), 7.25 – 7.19 (m, 2H), 7.13 – 7.05 (m, 2H), 6.98 (t,  $J = 7.4$  Hz, 1H), 6.89 (d,  $J = 8.1$  Hz, 1H), 6.80 – 6.69 (m, 2H), 6.03 – 5.93 (m, 1H), 5.46 – 5.37 (m, 1H), 5.32 – 5.25 (m, 1H), 4.65 (t,  $J = 7.6$  Hz, 1H), 4.55 – 4.48 (m, 1H), 4.37 – 4.31 (m, 1H), 3.52 – 3.44 (m, 2H).

**$^{13}\text{C}$  NMR** (101 MHz, Chloroform-*d*)  $\delta$  197.1, 175.3, 158.8, 143.8, 136.3, 133.3, 131.7, 130.5, 129.1, 128.7, 128.5, 127.7, 125.6, 124.8, 123.9, 122.3, 121.4, 118.0, 110.3, 109.9, 89.0, 44.4, 43.0, 40.6.

**HRMS** (ESI)  $m/z$ :  $[\text{M} + \text{Na}]^+$  Calculated for  $[\text{C}_{26}\text{H}_{21}\text{NO}_3\text{Na}^+]$ : 418.1414 found 418.1415.

**IR** (neat) 3058, 2915, 1729, 1682, 1608, 1472, 1363, 1239, 1186, 989, 750, 695  $\text{cm}^{-1}$ .

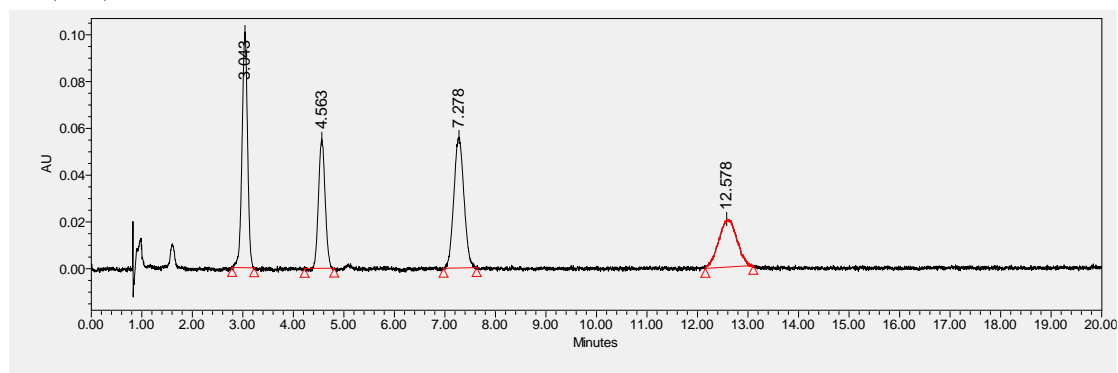

|   | Retention Time | Area   | % Area |
|---|----------------|--------|--------|
| 1 | 3.043          | 759784 | 29.74  |
| 2 | 4.563          | 509395 | 19.94  |
| 3 | 7.278          | 776389 | 30.39  |
| 4 | 12.578         | 509376 | 19.94  |

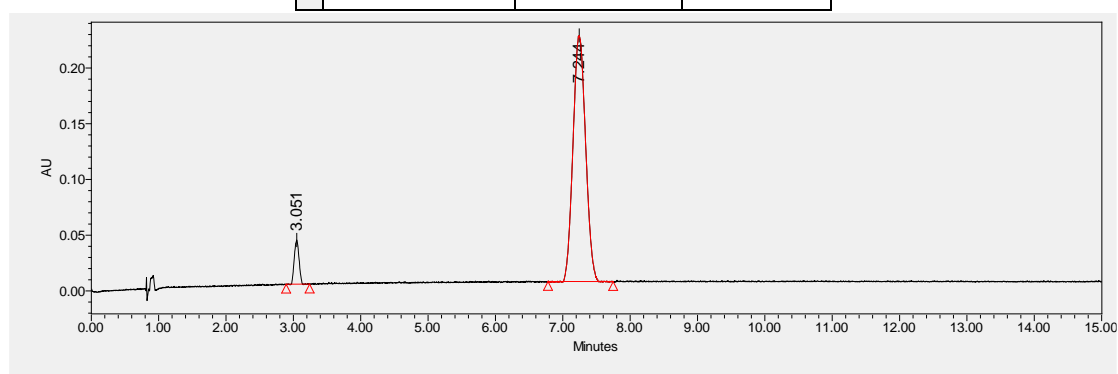

|   | Retention Time | Area    | % Area |
|---|----------------|---------|--------|
| 1 | 3.051          | 195818  | 6.38   |
| 2 | 7.244          | 2873283 | 93.62  |

**(2R,3S)-1'-benzyl-3-(2-oxo-2-phenylethyl)-3H-spiro[benzofuran-2,3'-indolin]-2'-one (C21):**

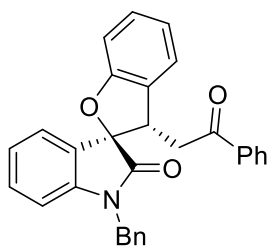

White solid, 78% yield, 90:10 er, >19:1 dr, m.p. 68-72 °C,  $[\alpha]^{20}_D = -17.1$  (c = 0.49, in CH<sub>2</sub>Cl<sub>2</sub>). Reacted for 120 h.

**SFC** Daicel Chiralcel OJ-3, CO<sub>2</sub>/MeOH = 85/15, 1.5 mL/min,  $\lambda = 240$  nm,  $t_1 = 7.06$  min,  $t_2 = 18.02$  min.

**<sup>1</sup>H NMR** (400 MHz, Chloroform-*d*)  $\delta$  7.66 – 7.60 (m, 2H), 7.49 – 7.45 (m, 3H), 7.38 – 7.27 (m, 5H), 7.25 – 7.20 (m, 2H), 7.07 (d,  $J = 7.3$  Hz, 1H), 7.03 – 6.96 (m, 2H), 6.91 (d,  $J = 8.1$  Hz, 1H), 6.74 (t,  $J = 7.5$  Hz,

1H), 6.55 (d,  $J = 7.9$  Hz, 1H), 5.05 – 4.93 (m, 2H), 4.72 (t,  $J = 7.5$  Hz, 1H), 3.51 (d,  $J = 7.3$  Hz, 2H).

**<sup>13</sup>C NMR** (101 MHz, Chloroform-*d*)  $\delta$  197.2, 175.8, 158.8, 143.8, 136.3, 135.6, 133.3, 130.6, 129.1, 128.9, 128.8, 128.6, 127.7, 127.7, 127.6, 125.6, 124.8, 124.0, 122.4, 121.5, 110.3, 110.1, 89.1, 44.5, 44.4, 40.6.

**HRMS** (ESI)  $m/z$ :  $[M + Na]^+$  Calculated for  $[C_{30}H_{23}NO_3Na]^+$ : 468.1570 found 468.1572.

**IR** (neat) 3059, 2918, 1730, 1682, 1608, 1476, 1360, 1239, 1180, 989, 750, 695 cm<sup>-1</sup>.

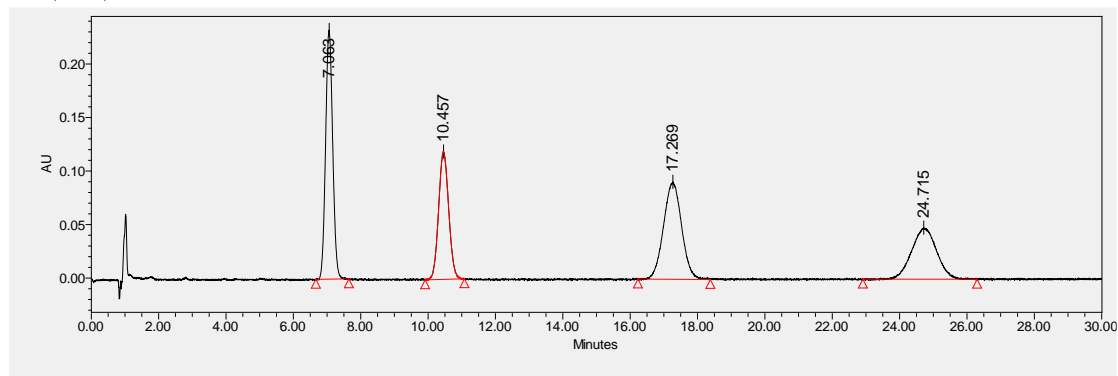

|   | Retention Time | Area    | % Area |
|---|----------------|---------|--------|
| 1 | 7.063          | 3388794 | 28.89  |
| 2 | 10.457         | 2481450 | 21.16  |
| 3 | 17.269         | 3383474 | 28.85  |
| 4 | 24.715         | 2475470 | 21.11  |

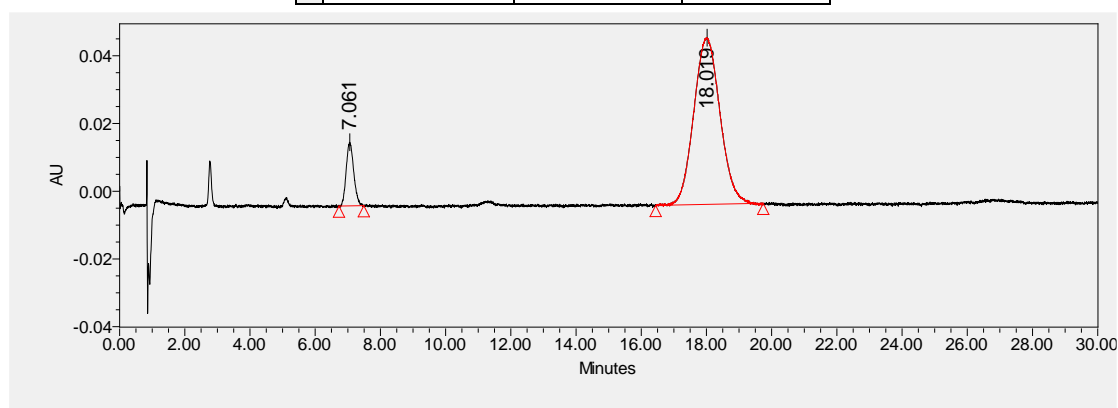

|   | Retention Time | Area    | % Area |
|---|----------------|---------|--------|
| 1 | 7.061          | 301690  | 9.88   |
| 2 | 18.019         | 2750687 | 90.12  |

**(2*R*,3*S*)-1'-ethyl-4-fluoro-3-(2-oxo-2-phenylethyl)-3*H*-spiro[benzofuran-2,3'-indolin]-2'-one**

**(C22):**

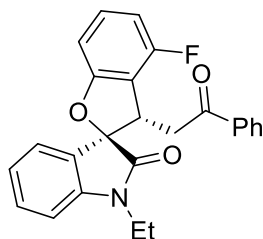

White solid, 96% yield, 91:9 er, 89:11 dr, m.p. 57-61 °C, Reacted for 144 h.

**SFC** Daicel Chiralpak IA-3, CO<sub>2</sub>/MeOH = 85/15, 1.5 mL/min, λ = 240 nm, t<sub>1</sub> = 2.64 min, t<sub>2</sub> = 3.11 min, t<sub>3</sub> = 4.14 min, t<sub>4</sub> = 7.70 min.

**minor product**

[α]<sub>D</sub><sup>20</sup> = -58.8 (c = 0.06, in CH<sub>2</sub>Cl<sub>2</sub>).

**<sup>1</sup>H NMR** (400 MHz, Chloroform-*d*) δ 7.89 (d, *J* = 7.6 Hz, 2H), 7.54 (t, *J* = 7.4 Hz, 1H), 7.42 (t, *J* = 7.7 Hz, 2H), 7.37 (t, *J* = 8.1 Hz, 1H), 7.26 – 7.16 (m, 2H), 7.05 (t, *J* = 7.4 Hz, 1H), 6.90 (d, *J* = 7.9 Hz, 1H), 6.70 (t, *J* = 8.5 Hz, 2H), 4.56 (dd, *J* = 11.2, 2.7 Hz, 1H), 4.19 (dd, *J* = 18.5, 11.2 Hz, 1H), 3.77 – 3.68 (m, 1H), 3.60 – 3.41 (m, 2H), 1.17 (t, *J* = 7.2 Hz, 3H).

**<sup>13</sup>C NMR** (101 MHz, Chloroform-*d*) δ 198.4, 172.2, 160.7 (d, *J* = 8.6 Hz), 159.5 (d, *J* = 264.4 Hz), 142.5, 136.5, 133.4, 130.6 (d, *J* = 19.8 Hz), 130.6, 130.5, 128.7, 128.2, 123.4, 123.2, 115.5 (d, *J* = 19.5 Hz), 108.8, 108.6 (d, *J* = 20.3 Hz), 106.6 (d, *J* = 3.3 Hz), 87.9, 44.4, 39.3, 34.9, 12.4.

**<sup>19</sup>F NMR** (376 MHz, Chloroform-*d*) δ -118.60.

**HRMS** (ESI) *m/z*: [M + Na]<sup>+</sup> Calculated for [C<sub>25</sub>H<sub>20</sub>FNO<sub>3</sub>Na<sup>+</sup>]: 424.1319 found 424.1323.

**IR** (neat) 2933, 1722, 1683, 1610, 1488, 1464, 1371, 1324, 1235, 1118, 991, 756, 690 cm<sup>-1</sup>.

**major product**

[α]<sub>D</sub><sup>20</sup> = -73.2 (c = 0.61, in CH<sub>2</sub>Cl<sub>2</sub>).

**<sup>1</sup>H NMR** (400 MHz, Chloroform-*d*) δ 7.62 – 7.55 (m, 2H), 7.46 (t, *J* = 7.4 Hz, 1H), 7.31 (t, *J* = 7.7 Hz, 2H), 7.22 – 7.13 (m, 1H), 7.11 – 7.07 (m, 2H), 6.77 – 6.64 (m, 4H), 4.77 (dd, *J* = 11.8, 3.2 Hz, 1H), 3.98 – 3.89 (m, 1H), 3.82 – 3.69 (m, 2H), 3.57 (dd, *J* = 18.3, 11.8 Hz, 1H), 1.40 (t, *J* = 7.2 Hz, 3H).

**<sup>13</sup>C NMR** (101 MHz, Chloroform-*d*) δ 196.9, 174.7, 160.8 (d, *J* = 8.8 Hz), 159.8 (d, *J* = 247.0 Hz), 143.9, 136.2, 133.2, 130.8, 130.4 (d, *J* = 8.9 Hz), 128.5, 127.6, 125.3, 125.1, 122.1, 114.9 (d, *J* = 18.7 Hz), 109.0, 108.6 (d, *J* = 20.7 Hz), 106.3 (d, *J* = 3.3 Hz), 89.4, 43.2, 39.2, 35.2, 12.4.

**<sup>19</sup>F NMR** (376 MHz, Chloroform-*d*) δ -119.06.

**HRMS** (ESI) *m/z*: [M + Na]<sup>+</sup> Calculated for [C<sub>25</sub>H<sub>20</sub>FNO<sub>3</sub>Na<sup>+</sup>]: 424.1319 found 424.1320.

**IR** (neat) 3061, 2981, 1728, 1610, 1461, 1369, 1262, 1211, 994, 755, 693 cm<sup>-1</sup>.

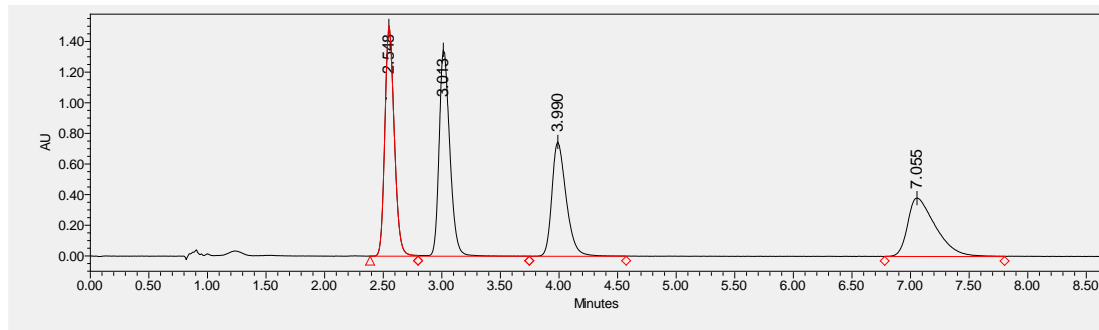

|   | Retention Time | Area    | % Area |
|---|----------------|---------|--------|
| 1 | 2.548          | 8389931 | 28.38  |
| 2 | 3.013          | 8537785 | 28.88  |

|   |       |         |       |
|---|-------|---------|-------|
| 3 | 3.990 | 6340555 | 21.45 |
| 4 | 7.055 | 6294888 | 21.29 |

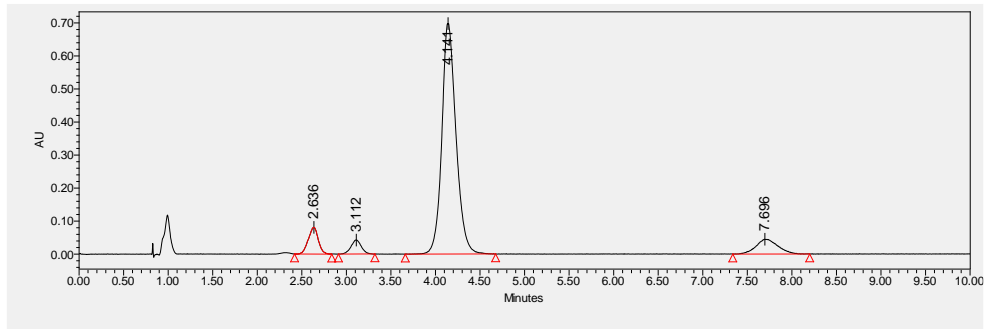

|   | Retention Time | Area    | % Area |
|---|----------------|---------|--------|
| 1 | 2.636          | 630421  | 6.67   |
| 2 | 3.112          | 339798  | 3.60   |
| 3 | 4.141          | 7711168 | 81.62  |
| 4 | 7.696          | 766017  | 8.11   |

**(2*R*,3*S*)-1'-ethyl-4,6-dimethoxy-3-(2-oxo-2-phenylethyl)-3*H*-spiro[benzofuran-2,3'-indolin]-2'-one (C23):**

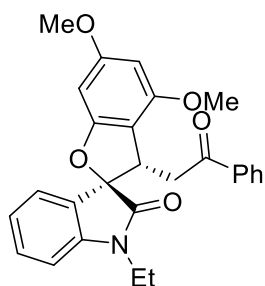

Yellow solid, 93% yield, 94:6 er, >19:1 dr, m.p. 72-76 °C,  $[\alpha]_D^{20} = -44.6$  (c = 0.77, in CH<sub>2</sub>Cl<sub>2</sub>). Reacted for 144 h.

**SFC** Daicel Chiralpak IB-3, CO<sub>2</sub>/MeOH = 90/10, 1.5 mL/min,  $\lambda = 240$  nm,  $t_1 = 9.22$  min,  $t_2 = 13.94$  min.

**<sup>1</sup>H NMR** (400 MHz, Chloroform-*d*)  $\delta$  7.57 (d,  $J = 7.4$  Hz, 2H), 7.44 (t,  $J = 7.4$  Hz, 1H), 7.31 – 7.28 (m, 2H), 7.13 (d,  $J = 7.3$  Hz, 1H), 7.06 (t,  $J = 7.8$  Hz, 1H), 6.70 (dd,  $J = 7.5, 5.0$  Hz, 2H), 6.11 (dd,  $J = 15.3, 1.8$  Hz, 2H), 4.60 (dd,  $J = 11.6, 3.5$  Hz, 1H), 3.93 – 3.83 (m, 2H), 3.77 (d,  $J = 2.9$  Hz, 6H), 3.73 (m, 1H), 3.42 (dd,  $J = 18.3, 11.6$  Hz, 1H), 1.37 (t,  $J = 7.2$  Hz, 3H).

**<sup>13</sup>C NMR** (101 MHz, Chloroform-*d*)  $\delta$  197.8, 175.2, 162.2, 160.8, 157.2, 143.8, 136.6, 132.8, 130.4, 128.3, 127.5, 126.0, 125.2, 121.9, 108.7, 107.0, 92.1, 89.5, 88.8, 55.7, 55.4, 43.4, 39.4, 35.0, 12.4.

**HRMS** (ESI)  $m/z$ :  $[M + Na]^+$  Calculated for [C<sub>27</sub>H<sub>25</sub>NO<sub>5</sub>Na<sup>+</sup>]: 446.1625 found 446.1628.

**IR** (neat) 3058, 2937, 1725, 1680, 1605, 1459, 1365, 1207, 1142, 1118, 997, 753 cm<sup>-1</sup>.

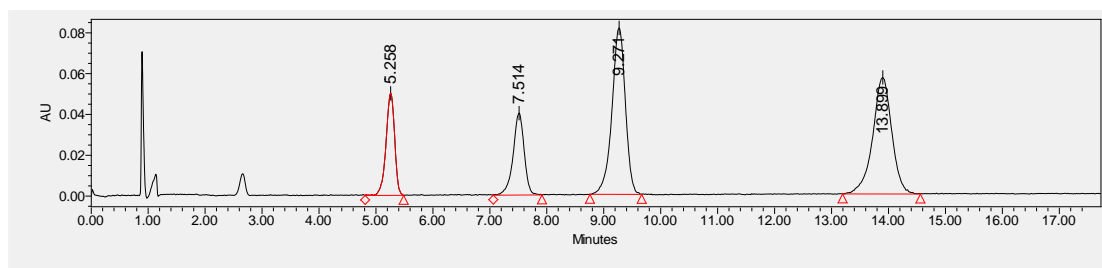

|   | Retention Time | Area    | % Area |
|---|----------------|---------|--------|
| 1 | 5.258          | 526904  | 14.12  |
| 2 | 7.514          | 541423  | 14.51  |
| 3 | 9.271          | 1334436 | 35.77  |
| 4 | 13.899         | 1327738 | 35.59  |

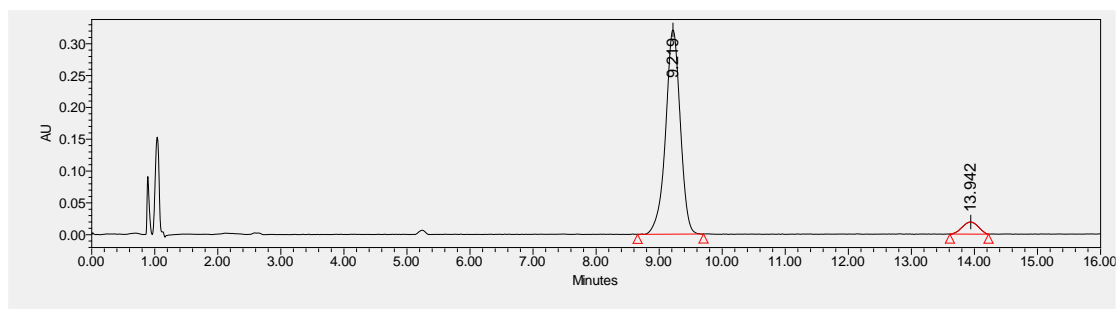

|   | Retention Time | Area    | % Area |
|---|----------------|---------|--------|
| 1 | 9.219          | 5181698 | 93.89  |
| 2 | 13.942         | 337156  | 6.11   |

**(2*R*,3*S*)-1'-ethyl-5-fluoro-3-(2-oxo-2-phenylethyl)-3*H*-spiro[benzofuran-2,3'-indolin]-2'-one (C24):**

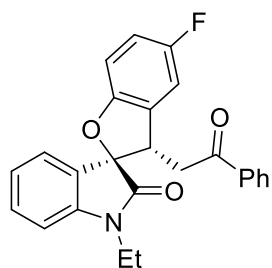

White solid, 88% yield, 94:6 er, >19:1 dr, m.p. 172-173 °C,  $[\alpha]_D^{21} = -31.0$  ( $c = 0.46$ , in  $\text{CH}_2\text{Cl}_2$ ). Reacted for 108 h.

**SFC** Daicel Chiralcel OD-3,  $\text{CO}_2/\text{MeOH} = 85/15$ , 1.5 mL/min,  $\lambda = 240$  nm,  $t_1 = 4.93$  min,  $t_2 = 5.99$  min.

**$^1\text{H}$  NMR** (400 MHz, Chloroform-*d*)  $\delta$  7.62 (d,  $J = 7.4$  Hz, 2H), 7.48 (t,  $J = 7.4$  Hz, 1H), 7.33 (t,  $J = 7.7$  Hz, 2H), 7.14 (t,  $J = 7.8$  Hz, 1H), 7.08 (d,  $J = 7.4$  Hz, 1H), 6.97 – 6.85 (m, 2H), 6.84 – 6.71 (m, 3H), 4.63 (dd,  $J = 8.9, 6.0$  Hz, 1H), 3.95 – 3.86 (m, 1H), 3.77 – 3.68 (m, 1H), 3.50 – 3.35 (m, 2H), 1.37 (t,  $J = 7.2$  Hz, 3H).

**$^{13}\text{C}$  NMR** (101 MHz, Chloroform-*d*)  $\delta$  196.6, 174.7, 158.2 (d,  $J = 238.3$  Hz) 154.7, 143.6, 136.1, 133.3, 130.8, 130.3 (d,  $J = 8.5$  Hz), 128.6, 127.7, 125.5, 124.9, 122.2, 115.2 (d,  $J = 24.1$  Hz), 111.3 (d,  $J = 25.2$  Hz), 110.4 (d,  $J = 8.5$  Hz), 109.1, 89.7, 44.5, 40.2, 35.1, 12.4.

**$^{19}\text{F}$  NMR** (376 MHz, Chloroform-*d*)  $\delta$  -123.29.

**HRMS** (ESI)  $m/z$ :  $[\text{M} + \text{Na}]^+$  Calculated for  $[\text{C}_{25}\text{H}_{20}\text{FNO}_3\text{Na}]^+$ : 424.1319 found 424.1319.

**IR** (neat) 3061, 2981, 2935, 1725, 1683, 1476, 1368, 1208, 996, 754, 693  $\text{cm}^{-1}$ .

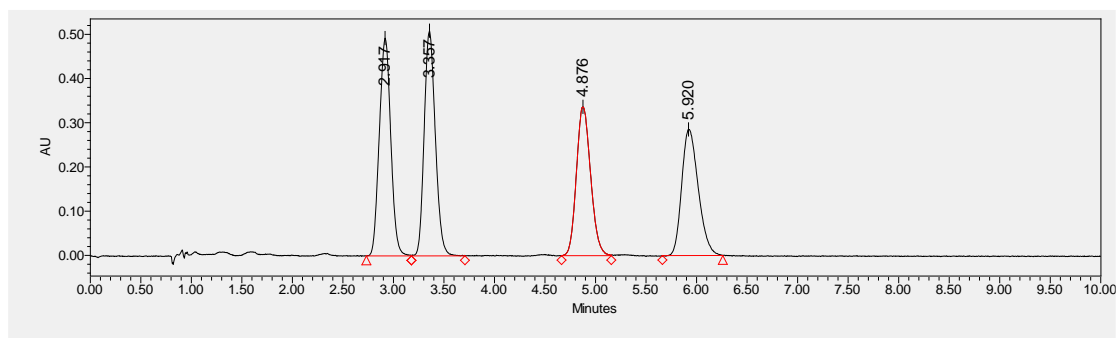

|   | Retention Time | Area    | % Area |
|---|----------------|---------|--------|
| 1 | 2.917          | 3876511 | 27.10  |
| 2 | 3.357          | 3891224 | 27.20  |
| 3 | 4.876          | 3289032 | 22.99  |
| 4 | 5.920          | 3247272 | 22.70  |

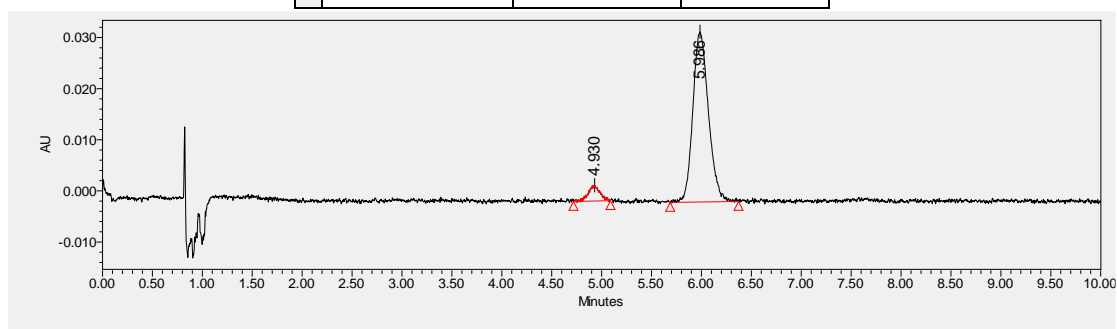

|   | Retention Time | Area   | % Area |
|---|----------------|--------|--------|
| 1 | 4.930          | 24838  | 6.42   |
| 2 | 5.986          | 362269 | 93.58  |



**(2*R*,3*S*)-5-chloro-1'-ethyl-3-(2-oxo-2-phenylethyl)-3*H*-spiro[benzofuran-2,3'-indolin]-2'-one (C25):**

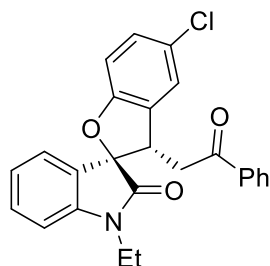

White solid, 91% yield, 90:10 er, 85:15 dr, m.p. 70-73 °C, Reacted for 120 h.

**SFC** Daicel Chiralcel OD-3, CO<sub>2</sub>/MeOH = 85/15, 1.5 mL/min, λ = 240 nm, t<sub>1</sub> = 3.86 min, t<sub>2</sub> = 4.60 min, t<sub>3</sub> = 6.50 min, t<sub>4</sub> = 7.06 min.

**minor product**

[α]<sub>D</sub><sup>21</sup> = -38.1 (c = 0.08, in CH<sub>2</sub>Cl<sub>2</sub>).

**<sup>1</sup>H NMR** (400 MHz, Chloroform-*d*) δ 7.92 – 7.86 (m, 2H), 7.56 (t, *J* = 7.4 Hz, 1H), 7.43 (t, *J* = 7.7 Hz, 2H), 7.37 (t, *J* = 8.2 Hz, 1H), 7.39 – 7.35 (m, 1H), 7.20 – 7.18 (m, 2H), 7.06 (t, *J* = 7.5 Hz, 1H), 6.88 (d, *J* = 7.8 Hz, 1H), 6.85 – 6.81 (m, 1H), 4.44 (dd, *J* = 9.0, 5.1 Hz, 1H), 3.95 (dd, *J* = 18.4, 9.1 Hz, 1H), 3.78 – 3.69 (m, 1H), 3.59 – 3.50 (m, 1H), 3.38 (dd, *J* = 18.4, 5.1 Hz, 1H), 1.20 (t, *J* = 7.2 Hz, 3H).

**<sup>13</sup>C NMR** (101 MHz, Chloroform-*d*) δ 197.9, 172.4, 157.6, 142.6, 136.4, 133.6, 131.3, 130.7, 130.1, 129.1, 128.8, 128.2, 126.4, 124.7, 123.6, 123.5, 111.3, 108.9, 88.3, 46.2, 41.0, 34.9, 12.5.

**HRMS** (ESI) *m/z*: [M + Na]<sup>+</sup> Calculated for [C<sub>25</sub>H<sub>20</sub><sup>35</sup>ClNO<sub>3</sub>Na<sup>+</sup>]: 440.1024 found 440.1028.

**HRMS** (ESI) *m/z*: [M + Na]<sup>+</sup> Calculated for [C<sub>25</sub>H<sub>20</sub><sup>37</sup>ClNO<sub>3</sub>Na<sup>+</sup>]: 442.0994 found 442.0999.

**IR** (neat) 2924, 2853, 1721, 1683, 1613, 1470, 1371, 1240, 1096, 995, 754, 500 cm<sup>-1</sup>.

**major product**

[α]<sub>D</sub><sup>20</sup> = -74.9 (c = 0.44, in CH<sub>2</sub>Cl<sub>2</sub>).

**<sup>1</sup>H NMR** (400 MHz, Chloroform-*d*) δ 7.62 (d, *J* = 7.5 Hz, 2H), 7.48 (t, *J* = 7.4 Hz, 1H), 7.35 – 7.32 (m, 2H), 7.20 – 7.11 (m, 3H), 7.06 (d, *J* = 7.3 Hz, 1H), 6.79 (t, *J* = 8.0 Hz, 2H), 6.74 (d, *J* = 7.9 Hz, 1H), 4.62 (t, *J* = 7.5 Hz, 1H), 3.96 – 3.87 (m, 1H), 3.78 – 3.69 (m, 1H), 3.47 – 3.39 (m, 2H), 1.37 (t, *J* = 7.2 Hz, 3H).

**<sup>13</sup>C NMR** (101 MHz, Chloroform-*d*) δ 196.6, 174.6, 157.6, 143.7, 136.1, 133.4, 130.9, 130.9, 129.0, 128.6, 127.7, 126.3, 125.4, 124.9, 124.2, 122.2, 111.2, 109.1, 89.7, 44.3, 40.2, 35.2, 12.4.

**HRMS** (ESI) *m/z*: [M + Na]<sup>+</sup> Calculated for [C<sub>25</sub>H<sub>20</sub><sup>35</sup>ClNO<sub>3</sub>Na<sup>+</sup>]: 440.1024 found 440.1026.

**HRMS** (ESI) *m/z*: [M + Na]<sup>+</sup> Calculated for [C<sub>25</sub>H<sub>20</sub><sup>37</sup>ClNO<sub>3</sub>Na<sup>+</sup>]: 442.0994 found 442.0997.

**IR** (neat) 3060, 2980, 2934, 1727, 1683, 1610, 1469, 1369, 1243, 1097, 995, 754, 502 cm<sup>-1</sup>.

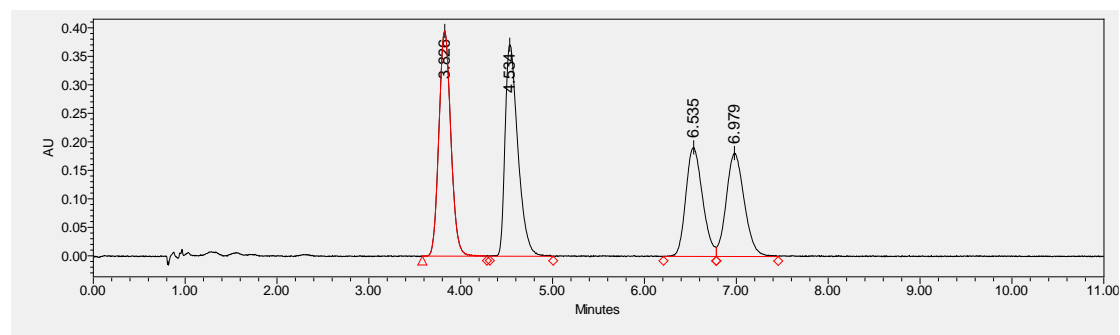

|   | Retention Time | Area    | % Area |
|---|----------------|---------|--------|
| 1 | 3.826          | 3554443 | 29.59  |
| 2 | 4.534          | 3572735 | 29.74  |

|   |       |         |       |
|---|-------|---------|-------|
| 3 | 6.535 | 2411735 | 20.08 |
| 4 | 6.979 | 2473544 | 20.59 |

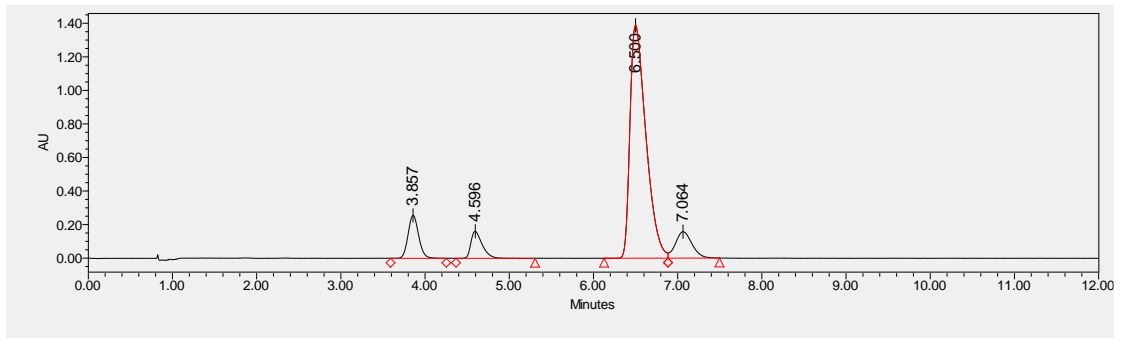

|   | Retention Time | Area     | % Area |
|---|----------------|----------|--------|
| 1 | 3.857          | 2249792  | 9.32   |
| 2 | 4.596          | 1526777  | 6.33   |
| 3 | 6.500          | 18205648 | 75.44  |
| 4 | 7.064          | 2150898  | 8.91   |

**(2R,3S)-5-bromo-1'-ethyl-3-(2-oxo-2-phenylethyl)-3H-spiro[benzofuran-2,3'-indolin]-2'-one (C26):**

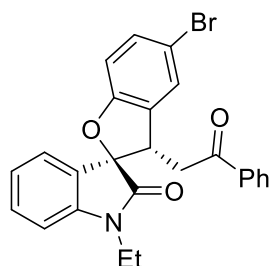

White solid, 81% yield, 93:7 er, 85:15 dr, m.p. 72-76 °C, Reacted for 144 h.

**SFC** Daicel Chiralcel OD-3, CO<sub>2</sub>/MeOH = 85/15, 1.5 mL/min, λ = 240 nm, t<sub>1</sub> = 4.61 min, t<sub>2</sub> = 5.80 min, t<sub>3</sub> = 7.42 min, t<sub>4</sub> = 8.78 min.

**minor product**

[α]<sub>D</sub><sup>21</sup> = -46.3 (c = 0.05, in CH<sub>2</sub>Cl<sub>2</sub>).

**<sup>1</sup>H NMR** (400 MHz, Chloroform-*d*) δ 7.94 – 7.83 (m, 2H), 7.59 – 7.52 (m, 1H), 7.43 (t, *J* = 7.7 Hz, 2H), 7.37 – 7.31 (m, 3H), 7.28 (d, *J* = 1.2 Hz, 1H), 7.08 – 7.05 (m, 1H), 6.88 (d, *J* = 7.8 Hz, 1H), 6.82 – 6.76 (m, 1H), 4.44 (dd, *J* = 9.1, 5.0 Hz, 1H), 3.96 (dd, *J* = 18.4, 9.2 Hz, 1H), 4.00 – 3.93 (m, 1H), 3.78 – 3.69 (m, 1H), 3.37 (dd, *J* = 18.4, 5.0 Hz, 1H), 1.20 (t, *J* = 7.2 Hz, 3H).

**<sup>13</sup>C NMR** (101 MHz, Chloroform-*d*) δ 197.9, 172.4, 158.2, 142.6, 136.4, 133.6, 132.0, 131.9, 130.8, 130.1, 128.8, 128.2, 127.6, 123.6, 123.5, 113.5, 112.0, 108.9, 88.3, 46.1, 41.1, 34.9, 12.5.

**HRMS** (ESI) *m/z*: [M + Na]<sup>+</sup> Calculated for [C<sub>25</sub>H<sub>20</sub><sup>79</sup>BrNO<sub>3</sub>Na<sup>+</sup>]: 484.0519 found 484.0513.

**HRMS** (ESI) *m/z*: [M + Na]<sup>+</sup> Calculated for [C<sub>25</sub>H<sub>20</sub><sup>81</sup>BrNO<sub>3</sub>Na<sup>+</sup>]: 486.0498 found 486.0492.

**IR** (neat) 2926, 2854, 1721, 1614, 1469, 1371, 1240, 1097, 996, 860, 753, 645, 499 cm<sup>-1</sup>.

**major product**

[α]<sub>D</sub><sup>20</sup> = -78.7 (c = 0.31, in CH<sub>2</sub>Cl<sub>2</sub>).

**<sup>1</sup>H NMR** (400 MHz, Chloroform-*d*) δ 7.68 – 7.56 (m, 2H), 7.48 (t, *J* = 7.4 Hz, 1H), 7.38 – 7.27 (m, 4H), 7.14 (td, *J* = 7.8, 1.1 Hz, 1H), 7.06 (d, *J* = 7.3 Hz, 1H), 6.84 – 6.69 (m, 3H), 4.78 – 4.54 (m, 1H), 3.96 – 3.87 (m, 1H), 3.78 – 3.69 (m, 1H), 3.45 (d, *J* = 2.6 Hz, 1H), 3.43 (s, 1H), 1.37 (t, *J* = 7.2 Hz, 3H).

**<sup>13</sup>C NMR** (101 MHz, Chloroform-*d*) δ 196.5, 174.6, 158.1, 143.7, 136.1, 133.4, 131.9, 131.4, 130.9, 128.6, 127.7, 127.1, 125.3, 124.9, 122.2, 113.3, 111.8, 109.1, 89.7, 44.3, 40.3, 35.2, 12.4.

**HRMS** (ESI) *m/z*: [M + Na]<sup>+</sup> Calculated for [C<sub>25</sub>H<sub>20</sub><sup>79</sup>BrNO<sub>3</sub>Na<sup>+</sup>]: 484.0519 found 484.0524.

**HRMS** (ESI) *m/z*: [M + Na]<sup>+</sup> Calculated for [C<sub>25</sub>H<sub>20</sub><sup>81</sup>BrNO<sub>3</sub>Na<sup>+</sup>]: 486.0498 found 486.0502.

**IR** (neat) 3060, 2933, 1728, 1610, 1468, 1368, 1241, 1136, 995, 864, 754, 633, 501 cm<sup>-1</sup>.

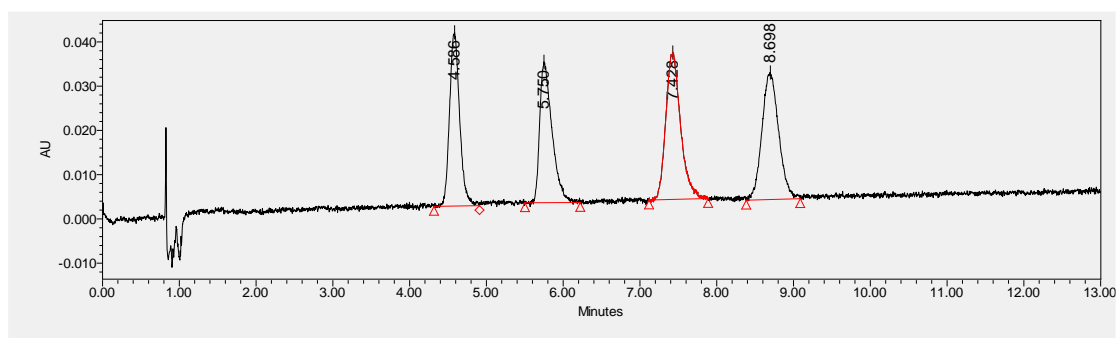

|   | Retention Time | Area   | % Area |
|---|----------------|--------|--------|
| 1 | 4.586          | 359617 | 22.55  |
| 2 | 5.750          | 356261 | 22.34  |
| 3 | 7.428          | 443558 | 27.82  |

|   |       |        |       |
|---|-------|--------|-------|
| 4 | 8.698 | 435199 | 27.29 |
|---|-------|--------|-------|

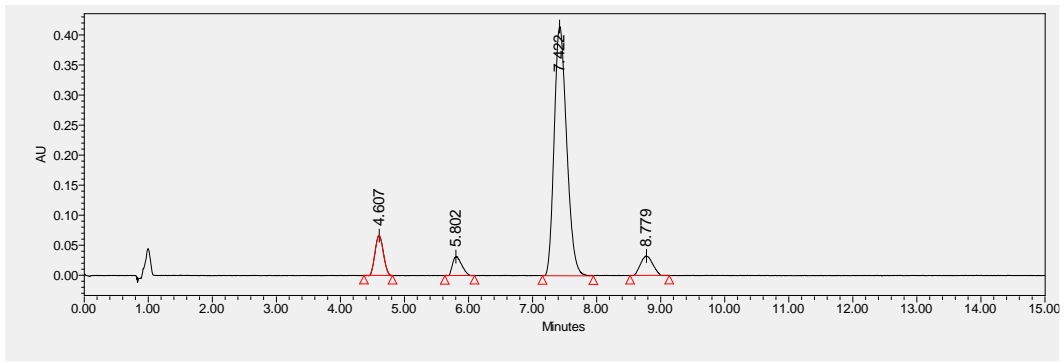

|   | Retention Time | Area    | % Area |
|---|----------------|---------|--------|
| 1 | 4.607          | 600908  | 8.64   |
| 2 | 5.802          | 313504  | 4.51   |
| 3 | 7.422          | 5612052 | 80.69  |
| 4 | 8.779          | 428272  | 6.16   |

**(2R,3S)-1'-ethyl-5-iodo-3-(2-oxo-2-phenylethyl)-3H-spiro[benzofuran-2,3'-indolin]-2'-one**  
(C27):

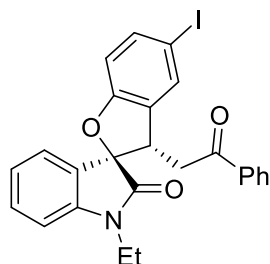

White solid, 96% yield, 92:8 er, 80:20 dr, m.p. 82-84 °C, Reacted for 108 h.

**SFC** Daicel Chiralcel OD-3, CO<sub>2</sub>/MeOH = 85/15, 1.5 mL/min, λ = 240 nm, t<sub>1</sub> = 5.89 min, t<sub>2</sub> = 7.45 min, t<sub>3</sub> = 8.77 min, t<sub>4</sub> = 11.31 min.

**minor product**

[α]<sub>D</sub><sup>20</sup> = -25.6 (c = 0.09, in CH<sub>2</sub>Cl<sub>2</sub>).

**<sup>1</sup>H NMR** (400 MHz, Chloroform-*d*) δ 7.89 (d, *J* = 7.5 Hz, 2H), 7.59 – 7.48 (m, 3H), 7.43 (t, *J* = 7.7 Hz, 2H), 7.37 (t, *J* = 7.8 Hz, 1H), 7.27 – 7.26 (m, 1H), 7.06 (t, *J* = 7.5 Hz, 1H), 6.88 (d, *J* = 7.9 Hz, 1H), 6.70 (d, *J* = 8.3 Hz, 1H), 4.43 (dd, *J* = 9.2, 4.8 Hz, 1H), 3.97 (dd, *J* = 18.4, 9.3 Hz, 1H), 4.01 – 3.94 (m, 1H), 3.78 – 3.69 (m, 1H), 3.36 (dd, *J* = 18.4, 4.9 Hz, 1H), 1.19 (t, *J* = 7.2 Hz, 3H).

**<sup>13</sup>C NMR** (101 MHz, Chloroform-*d*) δ 197.9, 172.3, 159.0, 142.6, 138.0, 136.4, 133.6, 133.4, 132.4, 130.7, 130.1, 128.8, 128.2, 123.6, 123.5, 112.7, 108.9, 88.1, 83.1, 46.0, 41.2, 34.9, 29.8, 12.5.

**HRMS** (ESI) *m/z*: [M + Na]<sup>+</sup> Calculated for [C<sub>25</sub>H<sub>20</sub>NO<sub>3</sub>Na<sup>+</sup>]: 532.0380 found 532.0385.

**IR** (neat) 2924, 2853, 1720, 1682, 1467, 1370, 1239, 995, 859, 753, 638, 553 cm<sup>-1</sup>.

**major product**

[α]<sub>D</sub><sup>20</sup> = -92.2 (c = 0.49, in CH<sub>2</sub>Cl<sub>2</sub>).

**<sup>1</sup>H NMR** (400 MHz, Chloroform-*d*) δ 7.62 (d, *J* = 7.3 Hz, 2H), 7.52 – 7.44 (m, 3H), 7.33 (t, *J* = 7.7 Hz, 2H), 7.16 – 7.10 (m, 1H), 7.05 (d, *J* = 7.3 Hz, 1H), 6.78 (t, *J* = 7.5 Hz, 1H), 6.73 (d, *J* = 7.9 Hz, 1H), 6.67 (d, *J* = 8.8 Hz, 1H), 4.67 – 4.57 (m, 1H), 3.96 – 3.87 (m, 1H), 3.78 – 3.69 (m, 1H), 3.49 – 3.39 (m, 2H), 1.37 (t, *J* = 7.2 Hz, 3H).

**<sup>13</sup>C NMR** (101 MHz, Chloroform-*d*) δ 196.6, 174.6, 158.9, 143.7, 137.9, 136.1, 133.4, 132.8, 132.0, 130.9, 128.6, 127.7, 125.3, 124.9, 122.2, 112.5, 109.1, 89.5, 82.8, 44.1, 40.3, 35.2, 12.4.

**HRMS** (ESI) *m/z*: [M + Na]<sup>+</sup> Calculated for [C<sub>25</sub>H<sub>20</sub>NO<sub>3</sub>Na<sup>+</sup>]: 532.0380 found 532.0388.

**IR** (neat) 3058, 2979, 2932, 1724, 1609, 1465, 1367, 1237, 1134, 994, 812, 752, 630, 500 cm<sup>-1</sup>.

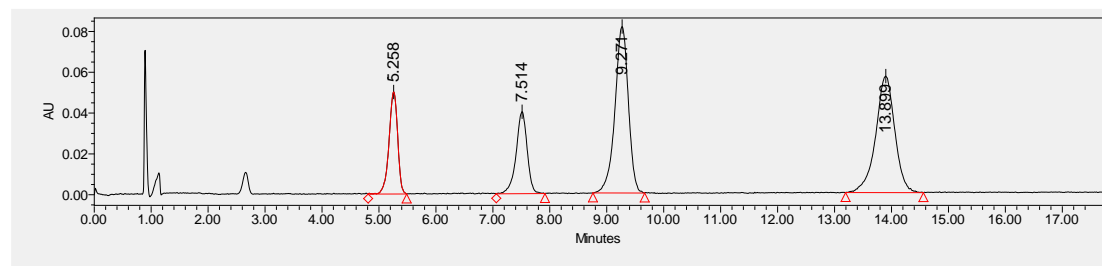

|   | Retention Time | Area    | % Area |
|---|----------------|---------|--------|
| 1 | 5.258          | 526904  | 14.12  |
| 2 | 7.514          | 541423  | 14.51  |
| 3 | 9.271          | 1334436 | 35.77  |
| 4 | 13.899         | 1327738 | 35.59  |

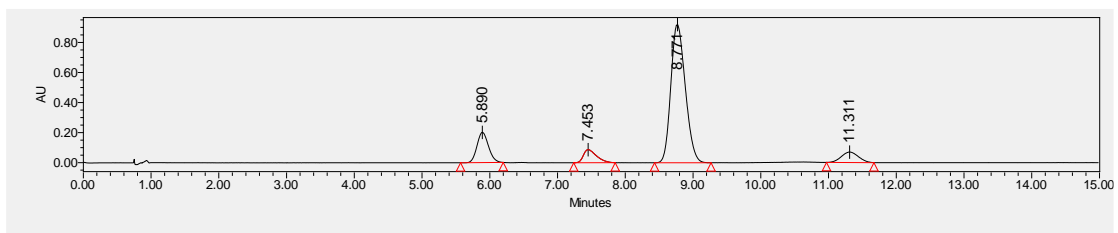

|   | Retention Time | Area     | % Area |
|---|----------------|----------|--------|
| 1 | 5.890          | 2366605  | 12.85  |
| 2 | 7.453          | 1166716  | 6.34   |
| 3 | 8.771          | 13657723 | 74.17  |
| 4 | 11.311         | 1223419  | 6.64   |

**(2*R*,3*S*)-1'-ethyl-5-nitro-3-(2-oxo-2-phenylethyl)-3*H*-spiro[benzofuran-2,3'-indolin]-2'-one (C28):**

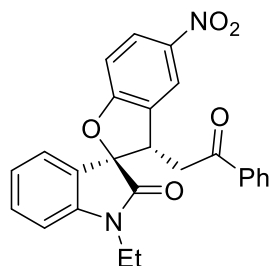

Yellow solid, 99% yield, 75:25 er, 64:36 dr, m.p. 87-89 °C, Reacted for 120 h.

**SFC** Daicel Chiralcel OD-3, CO<sub>2</sub>/MeOH = 85/15, 1.5 mL/min, λ = 240 nm, t<sub>1</sub> = 5.84 min, t<sub>2</sub> = 7.48 min, t<sub>3</sub> = 10.37 min, t<sub>4</sub> = 12.54 min.

**minor product**

[α]<sub>D</sub><sup>20</sup> = -92.0 (c = 0.05, in CH<sub>2</sub>Cl<sub>2</sub>).

**<sup>1</sup>H NMR** (400 MHz, Chloroform-*d*) δ 8.22 (dd, *J* = 8.8, 2.4 Hz, 1H), 8.17 – 8.16 (m, 1H), 7.67 – 7.61 (m, 2H), 7.54 – 7.46 (m, 1H), 7.35 (t, *J* = 7.7 Hz, 2H), 7.18 (td, *J* = 7.8, 1.2 Hz, 1H), 7.04 (dd, *J* = 7.5, 1.2 Hz, 1H), 6.95 (d, *J* = 8.8 Hz, 1H), 6.85 – 6.75 (m, 2H), 4.66 (dd, *J* = 10.1, 5.1 Hz, 1H), 3.95 (dq, *J* = 14.4, 7.2 Hz, 1H), 3.76 (dq, *J* = 14.3, 7.2 Hz, 1H), 3.61 – 3.46 (m, 2H), 1.41 (t, *J* = 7.2 Hz, 3H).

**<sup>13</sup>C NMR** (101 MHz, Chloroform-*d*) δ 196.1, 173.8, 163.9, 143.7, 142.7, 135.7, 133.5, 131.2, 130.6, 128.5, 127.6, 126.5, 124.9, 124.3, 122.2, 120.4, 110.0, 109.2, 90.9, 43.4, 40.1, 35.2, 12.3.

**HRMS** (ESI) *m/z*: [M + Na]<sup>+</sup> Calculated for [C<sub>25</sub>H<sub>20</sub>N<sub>2</sub>O<sub>5</sub>Na<sup>+</sup>]: 451.1264 found 451.1267.

**IR** (neat) 3061, 2981, 2936, 1721, 1682, 1606, 1516, 1470, 1371, 1260, 992, 749, 688 cm<sup>-1</sup>.

**major product**

[α]<sub>D</sub><sup>20</sup> = -40.0 (c = 0.28, in CH<sub>2</sub>Cl<sub>2</sub>).

**<sup>1</sup>H NMR** (400 MHz, Chloroform-*d*) δ 8.22 (dd, *J* = 8.8, 2.3 Hz, 1H), 8.14 (s, 1H), 7.89 (d, *J* = 7.3 Hz, 2H), 7.57 (t, *J* = 7.4 Hz, 1H), 7.50 – 7.38 (m, 3H), 7.31 (d, *J* = 7.2 Hz, 1H), 7.11 (t, *J* = 7.5 Hz, 1H), 6.96 (d, *J* = 8.9 Hz, 1H), 6.91 (d, *J* = 7.9 Hz, 1H), 4.53 (dd, *J* = 8.9, 5.2 Hz, 1H), 3.96 (dd, *J* = 18.4, 9.1 Hz, 1H), 3.74 (dq, *J* = 14.4, 7.2 Hz, 1H), 3.62 – 3.45 (m, 2H), 1.20 (t, *J* = 7.2 Hz, 3H).

**<sup>13</sup>C NMR** (101 MHz, Chloroform-*d*) δ 197.5, 171.6, 164.2, 143.0, 142.9, 136.1, 133.8, 131.2, 131.1, 129.1, 128.9, 128.2, 126.6, 123.8, 123.7, 121.0, 110.2, 109.1, 89.9, 45.3, 40.8, 35.0, 12.5.

**HRMS** (ESI) *m/z*: [M + Na]<sup>+</sup> Calculated for [C<sub>25</sub>H<sub>20</sub>N<sub>2</sub>O<sub>5</sub>Na<sup>+</sup>]: 451.1264 found 451.1271.

**IR** (neat) 2926, 1720, 1683, 1614, 1518, 1471, 1372, 1337, 1263, 1122, 994, 752, 650 cm<sup>-1</sup>.

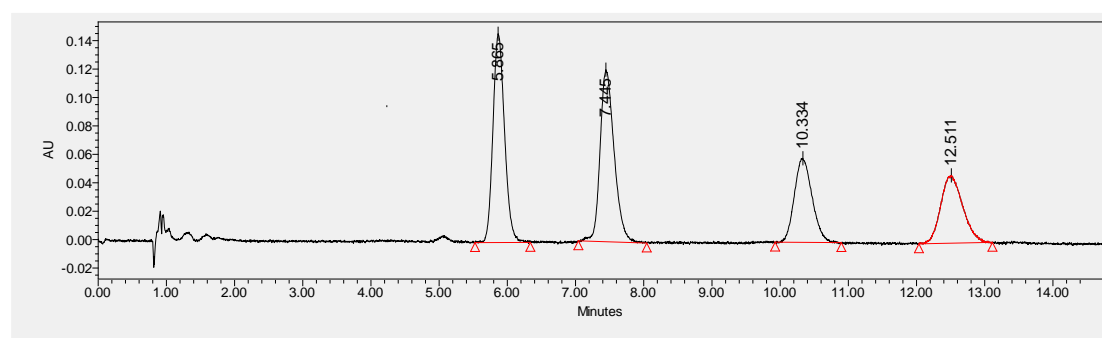

|   | Retention Time | Area    | % Area |
|---|----------------|---------|--------|
| 1 | 5.865          | 1735266 | 30.95  |
| 2 | 7.445          | 1733398 | 30.92  |
| 3 | 10.334         | 1071366 | 19.11  |
| 4 | 12.511         | 1066821 | 19.03  |

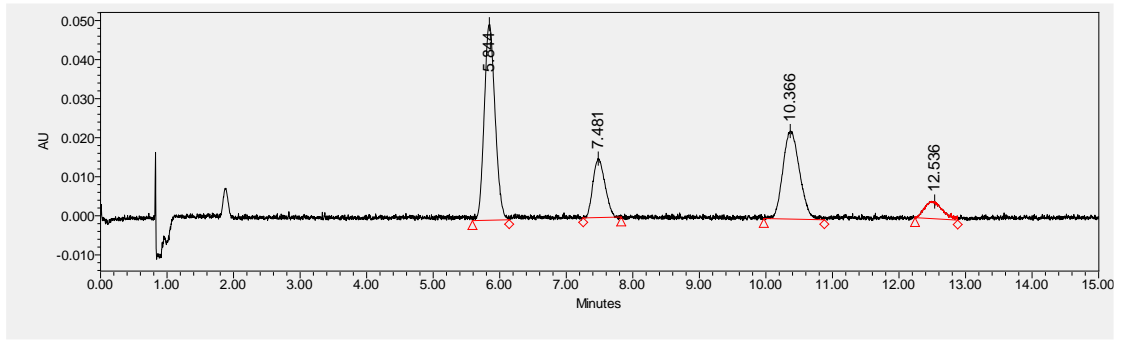

|   | Retention Time | Area   | % Area |
|---|----------------|--------|--------|
| 1 | 5.844          | 568281 | 45.93  |
| 2 | 7.481          | 190188 | 15.37  |
| 3 | 10.366         | 396530 | 32.05  |
| 4 | 12.536         | 82225  | 6.65   |



**(2*R*,3*S*)-5-(tert-butyl)-1'-ethyl-3-(2-oxo-2-phenylethyl)-3*H*-spiro[benzofuran-2,3'-indolin]-2'-one (C29):**

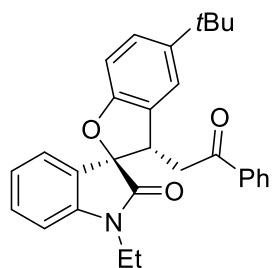

White solid, 77% yield, 93:7 er, >19:1 dr, m.p. 80-84 °C,  $[\alpha]_D^{19} = -66.0$  ( $c = 0.56$ , in  $\text{CH}_2\text{Cl}_2$ ). Reacted for 108 h.

**SFC** Daicel Chiralcel OX-3,  $\text{CO}_2/\text{MeOH} = 80/20$ , 1.5 mL/min,  $\lambda = 240$  nm,  $t_1 = 6.17$  min,  $t_2 = 7.65$  min.

**$^1\text{H NMR}$**  (400 MHz, Chloroform-*d*)  $\delta$  7.63 (d,  $J = 7.4$  Hz, 2H), 7.47 (t,  $J = 7.3$  Hz, 1H), 7.33 (t,  $J = 7.7$  Hz, 2H), 7.25 – 7.18 (m, 2H), 7.10 (t,  $J = 6.6$  Hz, 2H), 6.80 (d,  $J = 8.4$  Hz, 1H), 6.78 – 6.69 (m, 2H), 4.62 (dd,  $J = 9.0, 6.1$  Hz, 1H), 3.95 – 3.86 (m, 1H), 3.78 – 3.69 (m, 1H), 3.52 – 3.42 (m, 2H), 1.37 (t,  $J = 7.2$  Hz, 1H). 1.33 (s, 9H).

**$^{13}\text{C NMR}$**  (101 MHz, Chloroform-*d*)  $\delta$  197.1, 175.2, 156.5, 144.4, 143.6, 136.3, 133.0, 130.4, 128.4, 128.1, 127.6, 125.9, 125.8, 125.0, 121.9, 120.6, 109.3, 108.8, 89.0, 44.6, 40.5, 34.9, 34.5, 31.8, 12.3.

**HRMS** (ESI)  $m/z$ :  $[\text{M} + \text{Na}]^+$  Calculated for  $[\text{C}_{29}\text{H}_{29}\text{NO}_3\text{Na}^+]$ : 462.2040 found 462.2040.

**IR** (neat) 3059, 2960, 1729, 1610, 1489, 1366, 1249, 1214, 997, 754, 691  $\text{cm}^{-1}$ .

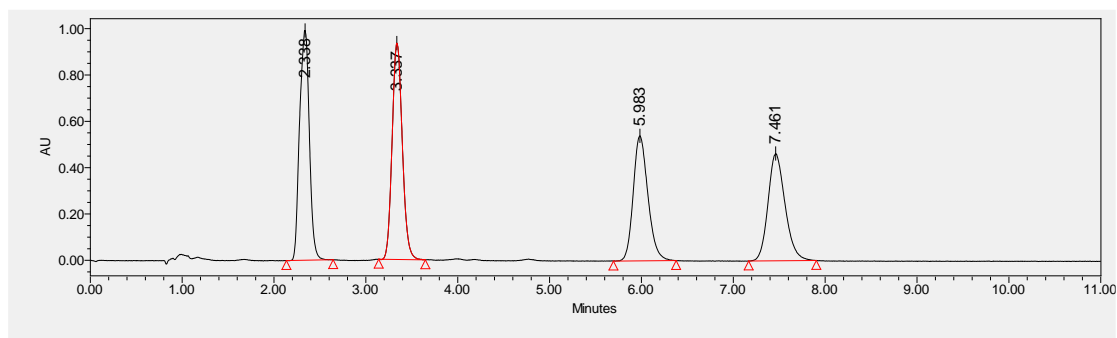

|   | Retention Time | Area    | % Area |
|---|----------------|---------|--------|
| 1 | 2.338          | 7296016 | 27.60  |
| 2 | 3.337          | 7197221 | 27.23  |
| 3 | 5.983          | 5990449 | 22.66  |
| 4 | 7.461          | 5947920 | 22.50  |

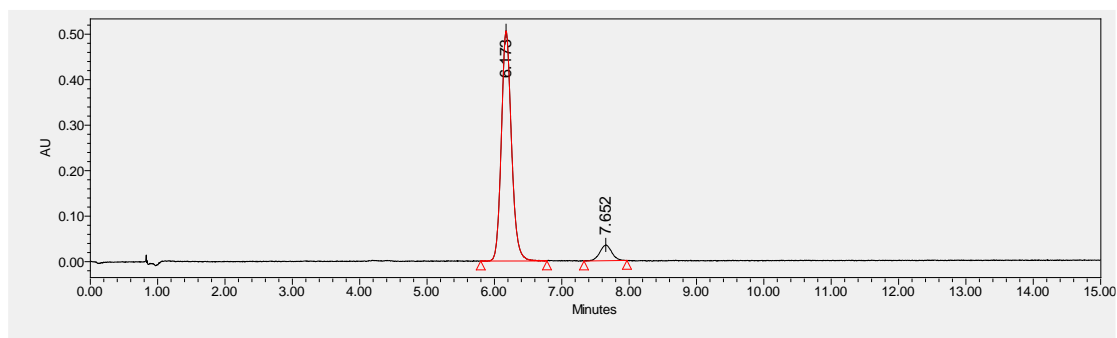

|   | Retention Time | Area    | % Area |
|---|----------------|---------|--------|
| 1 | 6.173          | 5280856 | 92.57  |
| 2 | 7.652          | 423884  | 7.43   |

**(2*R*,3*S*)-1'-ethyl-5-methyl-3-(2-oxo-2-phenylethyl)-3*H*-spiro[benzofuran-2,3'-indolin]-2'-one (C30):**

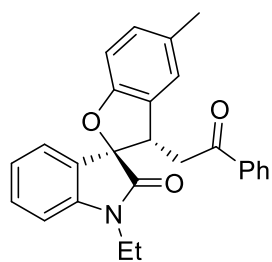

White solid, 87% yield, 96:4 er, >19:1 dr, m.p. 70-72 °C,  $[\alpha]_D^{19} = -81.3$  ( $c = 0.58$ , in  $\text{CH}_2\text{Cl}_2$ ). Reacted for 144 h.

**SFC** Daicel Chiralcel OD-3,  $\text{CO}_2/\text{MeOH} = 85/15$ , 1.5 mL/min,  $\lambda = 240$  nm,  $t_1 = 5.82$  min,  $t_2 = 6.96$  min.

**$^1\text{H NMR}$**  (400 MHz, Chloroform-*d*)  $\delta$  7.67 – 7.58 (m, 2H), 7.47 (t,  $J = 7.4$  Hz, 1H), 7.32 (t,  $J = 7.7$  Hz, 2H), 7.14 – 7.05 (m, 2H), 7.01 – 7.00 (m, 2H), 6.78 – 6.71 (m, 3H), 4.61 (t,  $J = 7.5$  Hz, 1H), 3.95 – 3.86 (m, 1H), 3.78 – 3.69 (m, 1H), 3.48 – 3.38 (m, 2H), 2.33 (s, 3H), 1.36 (t,  $J = 7.2$  Hz, 3H).

**$^{13}\text{C NMR}$**  (101 MHz, Chloroform-*d*)  $\delta$  197.0, 175.1, 156.8, 143.6, 136.3, 133.2, 130.7, 129.4, 128.8, 128.5, 127.7, 125.9, 124.9, 124.5, 122.1, 109.8, 108.9, 89.1, 44.5, 40.4, 35.1, 21.0, 12.4.

**HRMS** (ESI)  $m/z$ :  $[\text{M} + \text{Na}]^+$  Calculated for  $[\text{C}_{26}\text{H}_{23}\text{NO}_3\text{Na}^+]$ : 420.1570 found 420.1570.

**IR** (neat) 3057, 2979, 1725, 1682, 1609, 1486, 1365, 1248, 1215, 1102, 996, 809, 753, 693  $\text{cm}^{-1}$ .

Racemate: 1:1 dr determined by UPCC. The racemate isolation by UPCC of each diastereomer as below:

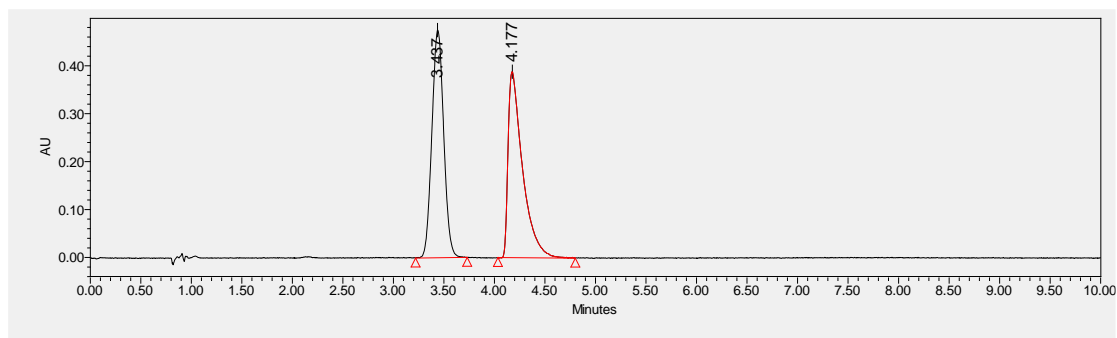

|   | Retention Time | Area    | % Area |
|---|----------------|---------|--------|
| 1 | 3.437          | 3862700 | 50.10  |
| 2 | 4.177          | 3846551 | 49.90  |

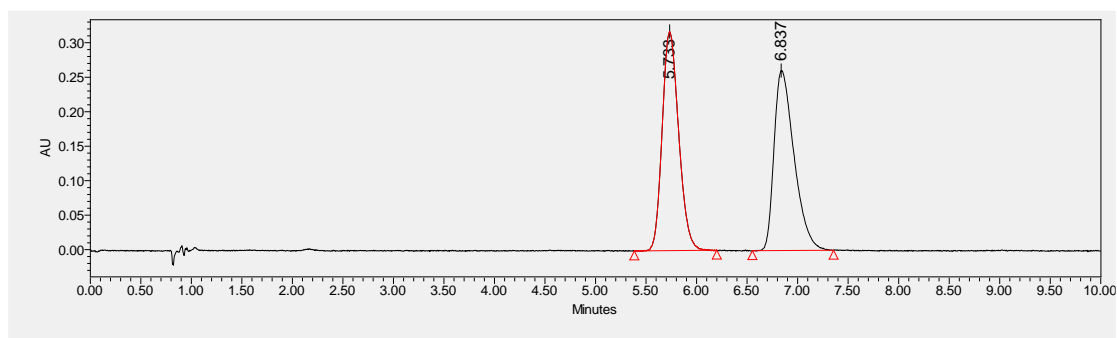

|   | Retention Time | Area    | % Area |
|---|----------------|---------|--------|
| 1 | 5.733          | 3594714 | 50.00  |
| 2 | 6.837          | 3594993 | 50.00  |

The UPCC spectra of asymmetric catalytic product as below:

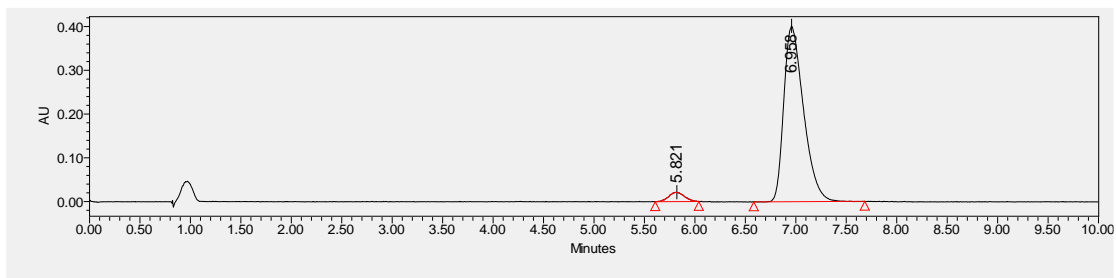

|   | Retention Time | Area    | % Area |
|---|----------------|---------|--------|
| 1 | 5.821          | 230540  | 4.06   |
| 2 | 6.958          | 5441700 | 95.94  |

**(2*R*,3*S*)-5,7-dichloro-1'-ethyl-3-(2-oxo-2-phenylethyl)-3*H*-spiro[benzofuran-2,3'-indolin]-2'-one (C31):**

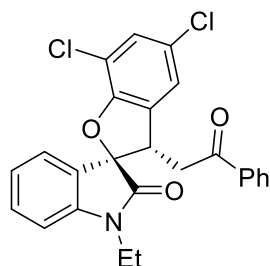

White solid, 99% yield, 73:27 er, 65:35 dr, m.p. 85-88 °C, Reacted for 120 h.

**SFC** Daicel Chiralcel OJ-3, CO<sub>2</sub>/MeOH = 85/15, 1.5 mL/min, λ = 240 nm, t<sub>1</sub> = 4.21 min, t<sub>2</sub> = 4.67 min, t<sub>3</sub> = 9.72 min, t<sub>4</sub> = 11.04 min.

**minor product**

[α]<sub>D</sub><sup>20</sup> = -24.1 (c = 0.22, in CH<sub>2</sub>Cl<sub>2</sub>).

**<sup>1</sup>H NMR** (400 MHz, Chloroform-*d*) δ 7.66 – 7.59 (m, 2H), 7.49 (t, *J* = 7.4 Hz, 1H), 7.34 (t, *J* = 7.7 Hz, 2H), 7.25 – 7.22 (m, 1H), 7.19 – 7.13 (m, 1H), 7.12 – 7.05 (m, 2H), 6.81 (t, *J* = 7.5 Hz, 1H), 6.75 (d, *J* = 7.9 Hz, 1H), 4.69 – 4.65 (d, *J* = 5.3 Hz, 1H), 3.93 (dq, *J* = 14.5, 7.2 Hz, 1H), 3.71 (dq, *J* = 14.3, 7.2 Hz, 1H), 3.52 – 3.36 (m, 2H), 1.38 (t, *J* = 7.2 Hz, 3H).

**<sup>13</sup>C NMR** (101 MHz, Chloroform-*d*) δ 196.2, 174.0, 153.9, 143.8, 136.0, 133.5, 132.1, 131.1, 129.1, 128.6, 127.7, 126.6, 125.1, 124.8, 122.7, 122.3, 116.2, 109.2, 90.1, 44.9, 40.3, 35.3, 12.4.

**HRMS** (ESI) *m/z*: [M + Na]<sup>+</sup> Calculated for [C<sub>25</sub>H<sub>19</sub><sup>35</sup>Cl<sub>2</sub>NO<sub>3</sub>Na<sup>+</sup>]: 474.0634 found 474.0640.

**HRMS** (ESI) *m/z*: [M + Na]<sup>+</sup> Calculated for [C<sub>25</sub>H<sub>19</sub><sup>37</sup>Cl<sub>2</sub>NO<sub>3</sub>Na<sup>+</sup>]: 476.0605 found 476.0609.

**IR** (neat) 3061, 2980, 1721, 1682, 1610, 1456, 1369, 1209, 998, 751, 692, 552 cm<sup>-1</sup>.

**major product**

[α]<sub>D</sub><sup>20</sup> = -33.1 (c = 0.52, in CH<sub>2</sub>Cl<sub>2</sub>).

**<sup>1</sup>H NMR** (400 MHz, Chloroform-*d*) δ 7.88 (d, *J* = 8.1 Hz, 2H), 7.56 (t, *J* = 7.4 Hz, 1H), 7.43 (t, *J* = 7.7 Hz, 2H), 7.38 (t, *J* = 7.8 Hz, 1H), 7.31 (d, *J* = 7.4 Hz, 1H), 7.26 – 7.22 (m, 1H), 7.12 – 7.05 (m, 2H), 6.87 (d, *J* = 7.9 Hz, 1H), 4.51 (dd, *J* = 8.5, 5.6 Hz, 1H), 3.90 (dd, *J* = 18.4, 8.7 Hz, 1H), 3.75 (dq, *J* = 14.4, 7.2 Hz, 1H), 3.53 (dq, *J* = 14.3, 7.1 Hz, 1H), 3.40 (dd, *J* = 18.4, 5.4 Hz, 1H), 1.20 (t, *J* = 7.2 Hz, 3H).

**<sup>13</sup>C NMR** (101 MHz, Chloroform-*d*) δ 197.5, 171.7, 154.0, 142.9, 136.2, 133.7, 132.5, 131.0, 129.2, 129.1, 128.8, 128.2, 126.7, 123.9, 123.6, 123.2, 116.2, 108.9, 88.8, 46.7, 40.7, 34.9, 12.5.

**HRMS** (ESI) *m/z*: [M + Na]<sup>+</sup> Calculated for [C<sub>25</sub>H<sub>19</sub><sup>35</sup>Cl<sub>2</sub>NO<sub>3</sub>Na<sup>+</sup>]: 474.0634 found 474.0639.

**HRMS** (ESI) *m/z*: [M + Na]<sup>+</sup> Calculated for [C<sub>25</sub>H<sub>19</sub><sup>37</sup>Cl<sub>2</sub>NO<sub>3</sub>Na<sup>+</sup>]: 476.0605 found 476.0611.

**IR** (neat) 3060, 2929, 1719, 1682, 1613, 1489, 1453, 1370, 1209, 1096, 998, 751, 690, 556 cm<sup>-1</sup>.

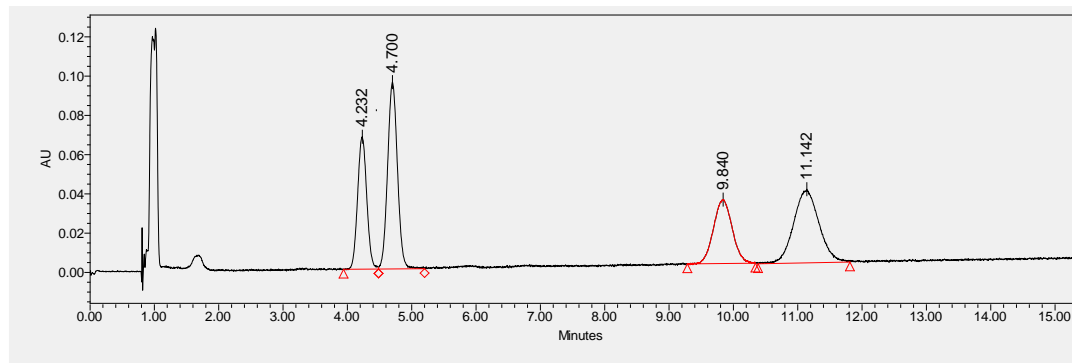

|   | Retention Time | Area    | % Area |
|---|----------------|---------|--------|
| 1 | 4.232          | 668569  | 19.90  |
| 2 | 4.700          | 1014183 | 30.18  |
| 3 | 9.840          | 656980  | 19.55  |

|   |        |         |       |
|---|--------|---------|-------|
| 4 | 11.142 | 1020450 | 30.37 |
|---|--------|---------|-------|

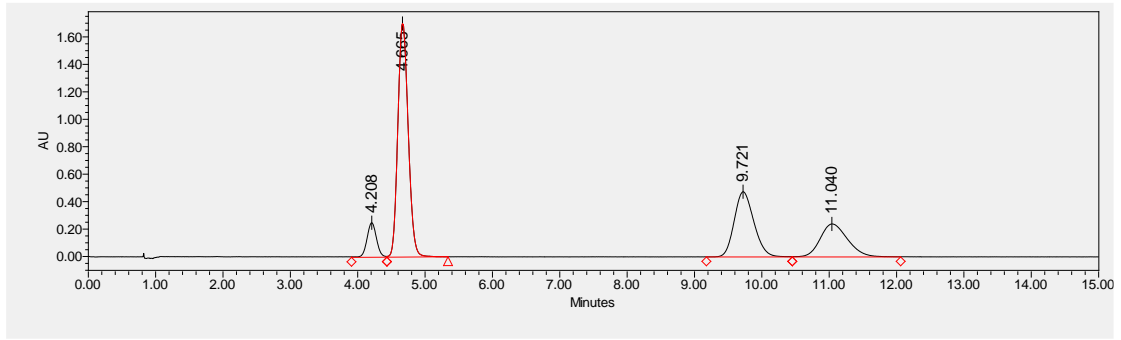

|   | Retention Time | Area     | % Area |
|---|----------------|----------|--------|
| 1 | 4.208          | 2474234  | 6.66   |
| 2 | 4.665          | 18250995 | 49.13  |
| 3 | 9.721          | 9626994  | 25.91  |
| 4 | 11.040         | 6796807  | 18.30  |

**(2*R*,3*S*)-6-(diethylamino)-1'-ethyl-3-(2-oxo-2-phenylethyl)-3*H*-spiro[benzofuran-2,3'-indolin]-2'-one (C32):**

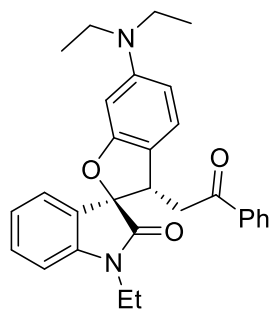

Yellow solid, 99% yield, 92:8 er, >19:1 dr, m.p. 64-68 °C,  $[\alpha]_D^{19} = 13.5$  ( $c = 0.84$ , in  $\text{CH}_2\text{Cl}_2$ ). Reacted for 120 h.

**SFC** Daicel Chiralcel OJ-3,  $\text{CO}_2/\text{MeOH} = 85/15$ , 1.5 mL/min,  $\lambda = 240$  nm,  $t_1 = 3.46$  min,  $t_2 = 8.48$  min.

**$^1\text{H}$  NMR** (400 MHz, Chloroform-*d*)  $\delta$  7.68 – 7.57 (m, 2H), 7.49 – 7.43 (m, 1H), 7.32 (t,  $J = 7.7$  Hz, 2H), 7.13 – 7.08 (m, 2H), 7.00 (d,  $J = 8.2$  Hz, 1H), 6.82 – 6.67 (m, 2H), 6.36 – 6.22 (m, 2H), 4.63 – 4.42 (m, 1H), 3.94 – 3.85 (dq,  $J = 14.4, 7.2$  Hz, 1H), 3.80 – 3.70 (dq,  $J = 14.3, 7.1$  Hz, 1H), 3.40 – 3.30 (m, 6H), 1.36 (t,  $J = 7.2$  Hz, 3H), 1.16 (t,  $J = 7.0$  Hz, 6H).

**$^{13}\text{C}$  NMR** (101 MHz, Chloroform-*d*)  $\delta$  197.4, 175.3, 160.5, 149.5, 143.6, 136.5, 133.0, 130.4, 128.5, 127.7, 126.3, 125.0, 124.0, 122.0, 115.0, 108.8, 105.0, 94.3, 89.3, 44.9, 44.0, 40.8, 35.0, 12.7, 12.5.

**HRMS** (ESI)  $m/z$ :  $[\text{M} + \text{Na}]^+$  Calculated for  $[\text{C}_{29}\text{H}_{30}\text{N}_2\text{O}_3\text{Na}^+]$ : 477.2149 found 477.2150.

**IR** (neat) 3058, 2971, 1726, 1617, 1507, 1359, 1213, 1119, 996, 750, 693  $\text{cm}^{-1}$ .

Racemate: 65:35 dr determined by  $^1\text{H}$  NMR. The racemate isolation by UPCC of the major diastereomer as below:

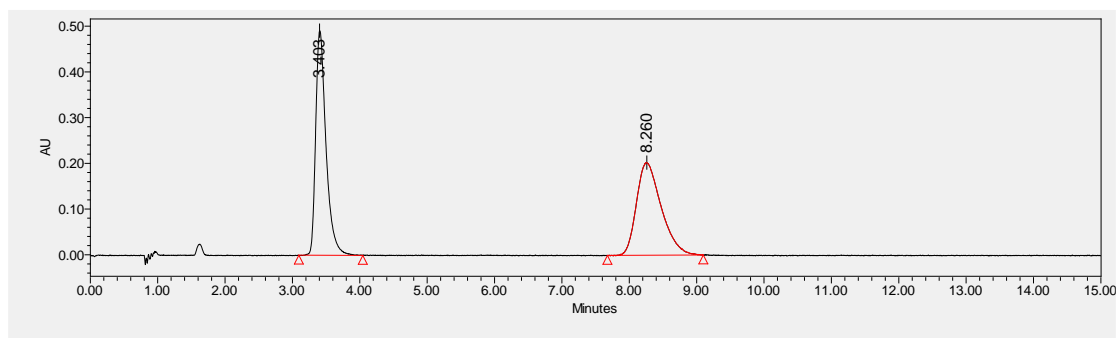

|   | Retention Time | Area    | % Area |
|---|----------------|---------|--------|
| 1 | 3.403          | 5230144 | 50.38  |
| 2 | 8.260          | 5150283 | 49.62  |

The UPCC spectra of the asymmetric catalytic product:

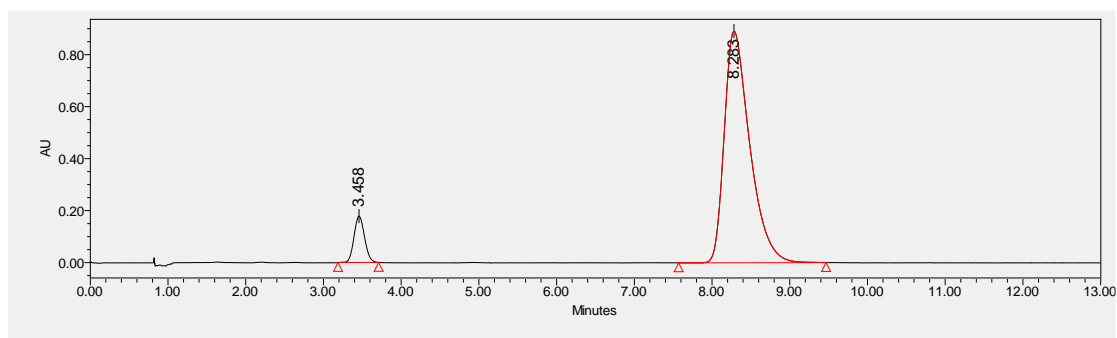

|   | Retention Time | Area     | % Area |
|---|----------------|----------|--------|
| 1 | 3.458          | 1681511  | 7.66   |
| 2 | 8.283          | 20257513 | 92.34  |

The racemate isolation by UPCC of the minor diastereomer as below :

SFC Daicel Chiralcel OD-3, CO<sub>2</sub>/MeOH = 85/15, 1.5 mL/min,  $\lambda$  = 240 nm, t<sub>1</sub> = 4.58 min, t<sub>2</sub> = 6.95 min.

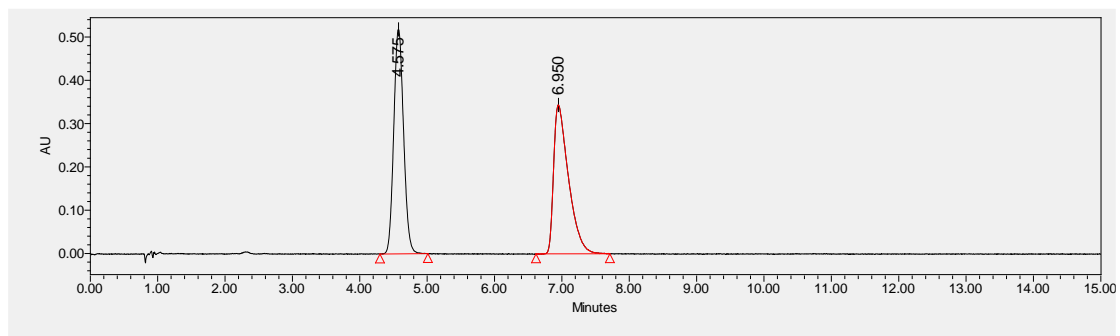

|   | Retention Time | Area    | % Area |
|---|----------------|---------|--------|
| 1 | 4.575          | 5260489 | 50.01  |
| 2 | 6.950          | 5257464 | 49.99  |

**(2*R*,3*S*)-1'-ethyl-6-methyl-3-(2-oxo-2-phenylethyl)-3*H*-spiro[benzofuran-2,3'-indolin]-2'-one (C33):**

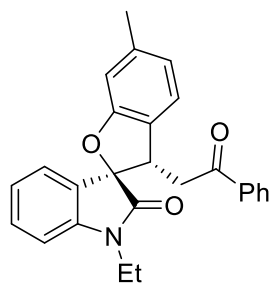

White solid, 97% yield, 93:7 er, >19:1 dr, m.p. 64-67 °C,  $[\alpha]_D^{21} = -23.4$  ( $c = 0.74$ , in  $\text{CH}_2\text{Cl}_2$ ). Reacted for 120 h.

**SFC** Daicel Chiralcel OD-3,  $\text{CO}_2/\text{MeOH} = 85/15$ , 1.5 mL/min,  $\lambda = 240$  nm,  $t_1 = 6.25$  min,  $t_2 = 7.45$  min.

**$^1\text{H NMR}$**  (400 MHz, Chloroform-*d*)  $\delta$  7.61 (d,  $J = 7.3$  Hz, 2H), 7.46 (t,  $J = 7.4$  Hz, 1H), 7.32 (t,  $J = 7.7$  Hz, 2H), 7.14 – 7.03 (m, 3H), 6.82 – 6.67 (m, 4H), 4.58 (t,  $J = 7.5$  Hz, 1H), 3.95 – 3.86 (m, 1H), 3.77 – 3.68 (m, 1H), 3.47 – 3.38 (m, 2H), 2.34 (s, 3H), 1.36 (t,  $J = 7.2$  Hz, 3H).

**$^{13}\text{C NMR}$**  (101 MHz, Chloroform-*d*)  $\delta$  197.1, 175.1, 159.1, 143.6, 139.3, 136.3, 133.1, 130.5, 128.5, 127.6, 125.9, 125.8, 124.9, 123.5, 122.1, 122.0, 110.9, 108.9, 44.2, 40.5, 35.0, 21.6, 12.4.

**HRMS** (ESI)  $m/z$ :  $[\text{M} + \text{Na}]^+$  Calculated for  $[\text{C}_{26}\text{H}_{23}\text{NO}_3\text{Na}^+]$ : 420.1570 found 420.1569.

**IR** (neat) 3056, 2979, 1725, 1681, 1609, 1492, 1364, 1259, 996, 750, 692, 499  $\text{cm}^{-1}$ .

Racemate: 1:1 dr determined by UPCC analysis of the mixture. The racemate isolation by UPCC of each diastereomer as below:

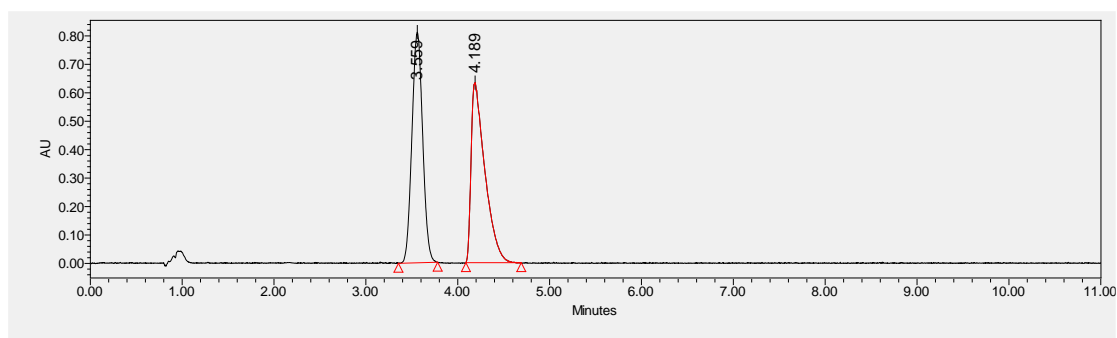

|   | Retention Time | Area    | % Area |
|---|----------------|---------|--------|
| 1 | 3.559          | 6581475 | 50.00  |
| 2 | 4.189          | 6580240 | 50.00  |

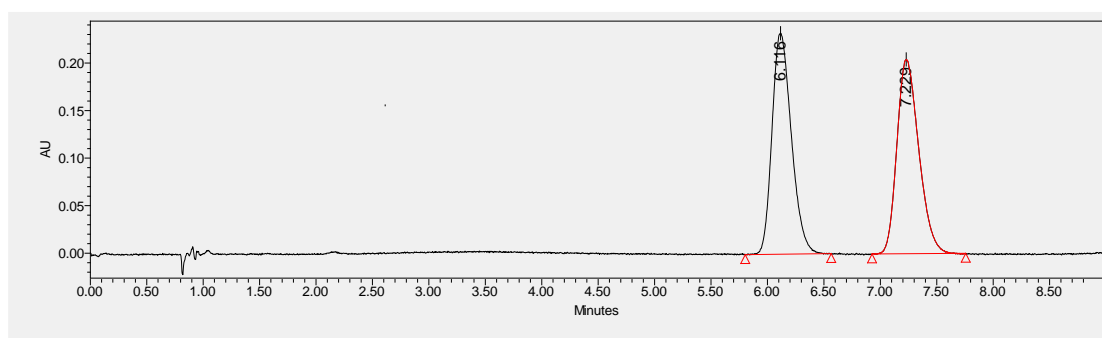

|   | Retention Time | Area    | % Area |
|---|----------------|---------|--------|
| 1 | 6.116          | 2770803 | 50.19  |
| 2 | 7.229          | 2749420 | 49.81  |



The UPCC of asymmetric catalytic product as below:

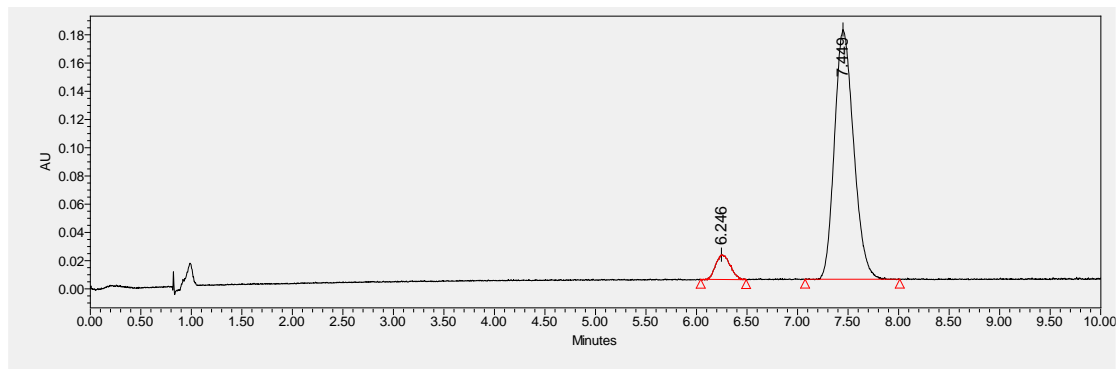

|   | Retention Time | Area    | % Area |
|---|----------------|---------|--------|
| 1 | 6.246          | 174823  | 6.98   |
| 2 | 7.449          | 2328448 | 93.02  |

**(2*R*,3*S*)-1'-ethyl-6-methoxy-3-(2-oxo-2-phenylethyl)-3*H*-spiro[benzofuran-2,3'-indolin]-2'-one (C34):**

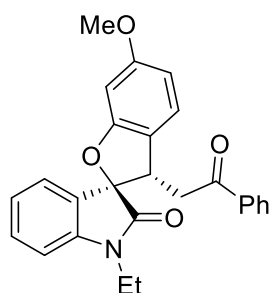

Yellow solid, 90% yield, 91:9 er, >19:1 dr, m.p. 63-66 °C,  $[\alpha]_D^{20} = -16.4$  ( $c = 0.78$ , in  $\text{CH}_2\text{Cl}_2$ ). Reacted for 120 h.

**SFC** Daicel Chiralcel OD-3,  $\text{CO}_2/\text{MeOH} = 85/15$ , 1.5 mL/min,  $\lambda = 240$  nm,  $t_1 = 7.76$  min,  $t_2 = 9.72$  min.

**$^1\text{H}$  NMR** (400 MHz, Chloroform-*d*)  $\delta$  7.66 – 7.55 (m, 2H), 7.50 – 7.42 (m, 1H), 7.32 (t,  $J = 7.7$  Hz, 2H), 7.15 – 7.05 (m, 3H), 6.84 – 6.68 (m, 2H), 6.56 – 6.43 (m, 2H), 4.64 – 4.51 (m, 1H), 3.93 – 3.86 (m, 1H), 3.81 – 3.66 (m, 4H), 3.46 – 3.37 (m, 2H), 1.37 (t,  $J = 7.2$  Hz, 3H).

**$^{13}\text{C}$  NMR** (101 MHz, Chloroform-*d*)  $\delta$  197.1, 174.9, 161.1, 160.1, 143.6, 136.3, 133.2, 130.6, 128.5, 127.6, 125.8, 124.9, 124.0, 122.1, 120.7, 108.9, 107.1, 96.8, 89.7, 55.7, 43.8, 40.6, 35.1, 12.4.

**HRMS** (ESI)  $m/z$ :  $[\text{M} + \text{Na}]^+$  Calculated for  $[\text{C}_{26}\text{H}_{23}\text{NO}_4\text{Na}^+]$ : 436.1519 found 436.1521.

**IR** (neat) 3059, 2936, 1726, 1612, 1494, 1366, 1285, 1149, 1026, 754, 693  $\text{cm}^{-1}$ .

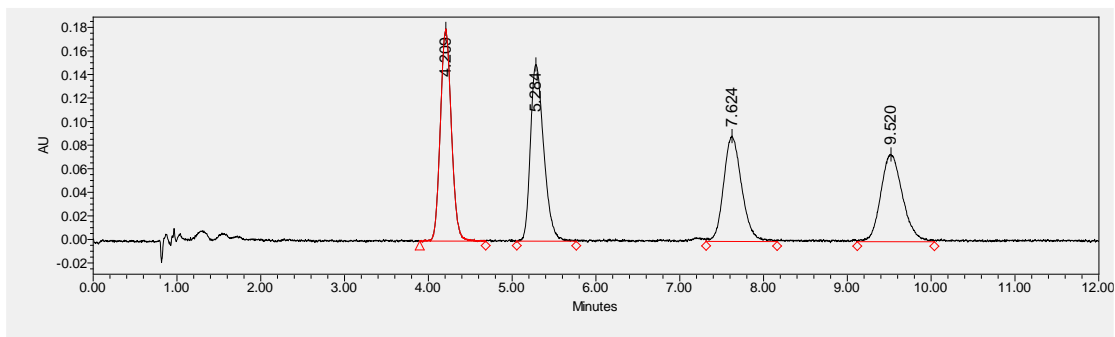

|   | Retention Time | Area    | % Area |
|---|----------------|---------|--------|
| 1 | 4.209          | 1645190 | 27.50  |
| 2 | 5.284          | 1653211 | 27.63  |
| 3 | 7.624          | 1342241 | 22.44  |
| 4 | 9.520          | 1341766 | 22.43  |

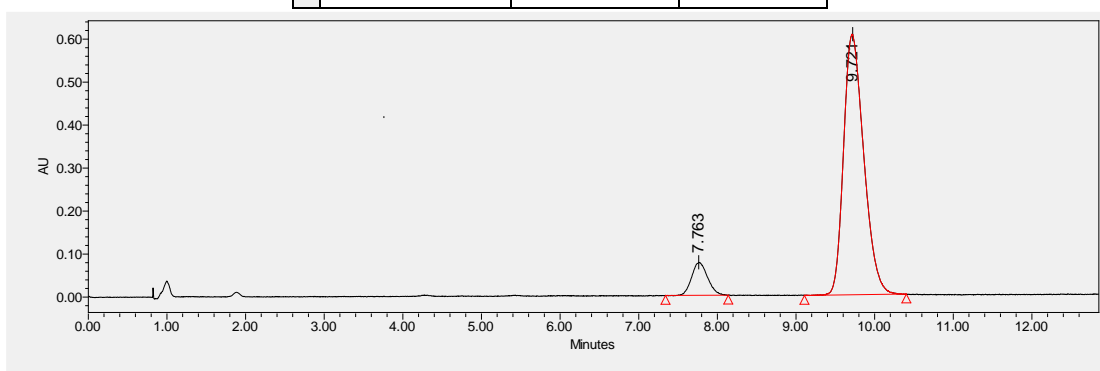

|   | Retention Time | Area     | % Area |
|---|----------------|----------|--------|
| 1 | 7.763          | 1081854  | 9.10   |
| 2 | 9.721          | 10801319 | 90.90  |

**(2*R*,3*S*)-1'-ethyl-6-fluoro-3-(2-oxo-2-phenylethyl)-3*H*-spiro[benzofuran-2,3'-indolin]-2'-one (C35):**

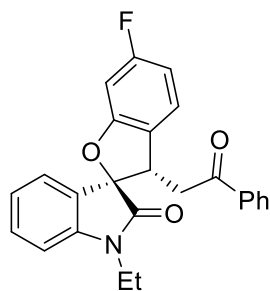

Yellow solid, 74% yield, 92:8 er, 83:17 dr, m.p. 139-142 °C. Reacted for 144 h.

**SFC** Daicel Chiralcel OJ-3, CO<sub>2</sub>/MeOH = 85/15, 1.5 mL/min, λ = 240 nm, t<sub>1</sub> = 2.44 min, t<sub>2</sub> = 3.53 min, t<sub>3</sub> = 4.76 min, t<sub>4</sub> = 7.02 min.

**minor product**

[α]<sub>D</sub><sup>20</sup> = -29.5 (c = 0.09, in CH<sub>2</sub>Cl<sub>2</sub>).

**<sup>1</sup>H NMR** (400 MHz, Chloroform-*d*) δ 7.93 – 7.83 (m, 2H), 7.55 (t, *J* = 7.4 Hz, 1H), 7.43 (t, *J* = 7.7 Hz, 2H), 7.37 (td, *J* = 7.8, 1.2 Hz, 1H), 7.28 (d, *J* = 7.4 Hz, 1H), 7.12 (dd, *J* = 8.1, 6.2 Hz, 1H), 7.09 – 7.04 (m, 1H), 6.88 (d, *J* = 7.8 Hz, 1H), 6.72 – 6.58 (m, 2H), 4.40 (dd, *J* = 9.0, 5.1 Hz, 1H), 3.93 (dd, *J* = 18.4, 9.1 Hz, 1H), 3.74 (dq, *J* = 14.5, 7.3 Hz, 1H), 3.55 (dq, *J* = 14.3, 7.2 Hz, 1H), 3.38 (dd, *J* = 18.4, 5.1 Hz, 1H), 1.20 (t, *J* = 7.2 Hz, 3H).

**<sup>13</sup>C NMR** (101 MHz, Chloroform-*d*) δ 198.2, 172.4, 163.8 (d, *J* = 244.9 Hz), 160.0 (d, *J* = 13.0 Hz), 142.6, 136.5, 133.5, 130.7, 130.2, 128.8, 128.2, 124.9 (d, *J* = 2.6 Hz), 124.8, 124.7, 123.5 (d, *J* = 10.8 Hz), 108.8, 108.3 (d, *J* = 22.9 Hz), 99.0 (d, *J* = 26.9 Hz), 88.9, 45.6, 41.3, 34.9, 12.5.

**<sup>19</sup>F NMR** (376 MHz, Chloroform-*d*) δ -112.91.

**HRMS** (ESI) *m/z*: [M + Na]<sup>+</sup> Calculated for [C<sub>25</sub>H<sub>20</sub>FNO<sub>3</sub>Na<sup>+</sup>]: 424.1319 found 424.1320.

**IR** (neat) 3061, 2929, 1719, 1682, 1612, 1490, 1369, 1270, 1134, 994, 840, 752, 616 cm<sup>-1</sup>.

**major product**

[α]<sub>D</sub><sup>20</sup> = -40.0 (c = 0.54, in CH<sub>2</sub>Cl<sub>2</sub>).

**<sup>1</sup>H NMR** (400 MHz, Chloroform-*d*) δ 7.67 – 7.58 (m, 2H), 7.48 (t, *J* = 7.4 Hz, 1H), 7.33 (t, *J* = 7.7 Hz, 2H), 7.18 – 7.05 (m, 3H), 6.79 (t, *J* = 7.4 Hz, 1H), 6.74 (d, *J* = 7.9 Hz, 1H), 6.67 (td, *J* = 9.1, 2.3 Hz, 1H), 6.61 (dd, *J* = 9.2, 2.2 Hz, 1H), 4.57 (t, *J* = 7.5 Hz, 1H), 3.91 (dq, *J* = 14.5, 7.2 Hz, 1H), 3.73 (dq, *J* = 14.3, 7.2 Hz, 1H), 3.42 (d, *J* = 7.6 Hz, 2H), 1.37 (t, *J* = 7.2 Hz, 3H).

**<sup>13</sup>C NMR** (101 MHz, Chloroform-*d*) δ 196.8, 174.6, 163.7 (d, *J* = 244.6 Hz), 159.9 (d, *J* = 13.1 Hz), 143.7, 136.2, 133.3, 130.8, 128.6, 127.7, 125.4, 125.0, 124.5 (d, *J* = 2.6 Hz), 124.2 (d, *J* = 10.4 Hz), 122.2, 109.1, 108.0 (d, *J* = 23.0 Hz), 98.8 (d, *J* = 26.9 Hz), 90.1, 43.7, 40.5, 35.2, 12.4.

**<sup>19</sup>F NMR** (376 MHz, Chloroform-*d*) δ -113.01.

**HRMS** (ESI) *m/z*: [M + Na]<sup>+</sup> Calculated for [C<sub>25</sub>H<sub>20</sub>FNO<sub>3</sub>Na<sup>+</sup>]: 424.1319 found 424.1322.

**IR** (neat) 3062, 2932, 1727, 1683, 1611, 1491, 1369, 1271, 1134, 996, 840, 754, 616 cm<sup>-1</sup>.

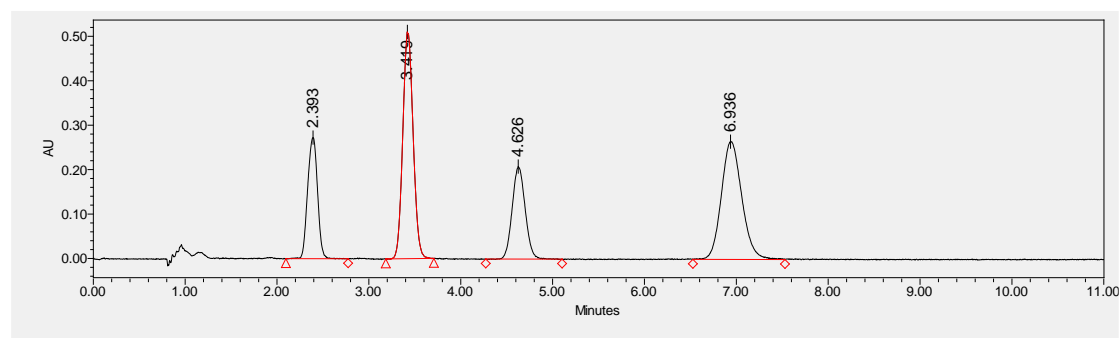

|   | Retention Time | Area    | % Area |
|---|----------------|---------|--------|
| 1 | 2.393          | 2036265 | 16.72  |
| 2 | 3.419          | 3994741 | 32.80  |
| 3 | 4.626          | 2040781 | 16.76  |
| 4 | 6.936          | 4107807 | 33.73  |

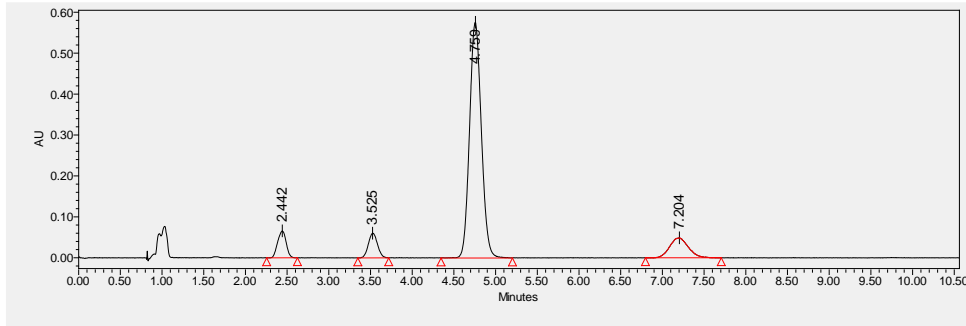

|   | Retention Time | Area    | % Area |
|---|----------------|---------|--------|
| 1 | 2.442          | 467259  | 6.36   |
| 2 | 3.525          | 458841  | 6.25   |
| 3 | 4.759          | 5664066 | 77.11  |
| 4 | 7.204          | 754880  | 10.28  |

**(2*R*,3*S*)-6-bromo-1'-ethyl-3-(2-oxo-2-phenylethyl)-3*H*-spiro[benzofuran-2,3'-indolin]-2'-one (C36):**

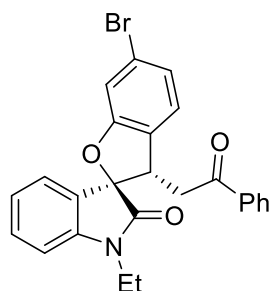

White solid, 98% yield, 90:10 er, 65:35 dr, m.p. 68-71 °C, Reacted for 120 h.

**SFC** Daicel Chiralpak AS-3, CO<sub>2</sub>/MeOH = 85/15, 1.5 mL/min, λ = 240 nm, t<sub>1</sub> = 2.57 min, t<sub>2</sub> = 2.90 min, t<sub>3</sub> = 4.59 min, t<sub>4</sub> = 10.75 min

**minor product**

[α]<sub>D</sub><sup>20</sup> = -22.1 (c = 0.47, in CH<sub>2</sub>Cl<sub>2</sub>).

**<sup>1</sup>H NMR** (400 MHz, Chloroform-*d*) δ 7.88 (d, *J* = 7.6 Hz, 2H), 7.55 (t, *J* = 7.4 Hz, 1H), 7.43 (t, *J* = 7.7 Hz, 2H), 7.37 (t, *J* = 7.4 Hz, 1H), 7.28 – 7.26 (m, 1H), 7.13 – 7.02 (m, 4H), 6.88 (d, *J* = 7.8 Hz, 1H), 4.40 (dd, *J* = 8.9, 5.2 Hz, 1H), 3.92 (dd, *J* = 18.4, 9.0 Hz, 1H), 3.73 (dq, *J* = 14.4, 7.3 Hz, 1H), 3.54 (dq, *J* = 14.3, 7.2 Hz, 1H), 3.37 (dd, *J* = 18.4, 5.2 Hz, 1H), 1.20 (t, *J* = 7.2 Hz, 3H).

**<sup>13</sup>C NMR** (101 MHz, Chloroform-*d*) δ 198.0, 172.3, 159.9, 142.7, 136.4, 133.6, 130.8, 130.0, 128.8, 128.7, 128.2, 125.5, 124.7, 123.6, 123.5, 122.2, 114.0, 108.9, 88.5, 45.8, 41.0, 34.9, 12.5.

**HRMS** (ESI) *m/z*: [M + Na]<sup>+</sup> Calculated for [C<sub>25</sub>H<sub>20</sub><sup>79</sup>BrNO<sub>3</sub>Na<sup>+</sup>]: 484.0519 found 484.0515.

**HRMS** (ESI) *m/z*: [M + Na]<sup>+</sup> Calculated for [C<sub>25</sub>H<sub>20</sub><sup>81</sup>BrNO<sub>3</sub>Na<sup>+</sup>]: 486.0498 found 486.0500.

**IR** (neat) 3060, 2925, 2854, 1718, 1612, 1470, 1369, 1318, 1213, 1097, 993, 750, 689 cm<sup>-1</sup>.

**major product**

[α]<sub>D</sub><sup>20</sup> = -11.2 (c = 0.53, in CH<sub>2</sub>Cl<sub>2</sub>).

**<sup>1</sup>H NMR** (400 MHz, Chloroform-*d*) δ 7.67 – 7.58 (m, 2H), 7.48 (t, *J* = 7.4 Hz, 1H), 7.33 (t, *J* = 7.7 Hz, 2H), 7.18 – 7.01 (m, 5H), 6.79 (t, *J* = 7.5 Hz, 1H), 6.74 (d, *J* = 7.9 Hz, 1H), 4.56 (t, *J* = 7.5 Hz, 1H), 3.91 (dq, *J* = 14.4, 7.2 Hz, 1H), 3.73 (dq, *J* = 14.3, 7.2 Hz, 1H), 3.42 (d, *J* = 7.6 Hz, 2H), 1.37 (t, *J* = 7.2 Hz, 3H).

**<sup>13</sup>C NMR** (101 MHz, Chloroform-*d*) δ 196.7, 174.6, 159.8, 143.7, 136.2, 133.3, 130.9, 128.6, 128.3, 127.7, 125.3, 125.0, 124.5, 122.2, 122.0, 113.8, 109.1, 89.8, 44.0, 40.3, 35.2, 12.4.

**HRMS** (ESI) *m/z*: [M + Na]<sup>+</sup> Calculated for [C<sub>25</sub>H<sub>20</sub><sup>79</sup>BrNO<sub>3</sub>Na<sup>+</sup>]: 484.0519 found 484.0523.

**HRMS** (ESI) *m/z*: [M + Na]<sup>+</sup> Calculated for [C<sub>25</sub>H<sub>20</sub><sup>81</sup>BrNO<sub>3</sub>Na<sup>+</sup>]: 486.0498 found 486.0504.

**IR** (neat) 3060, 2979, 1724, 1683, 1608, 1471, 1368, 1223, 1102, 934, 753, 689 cm<sup>-1</sup>.

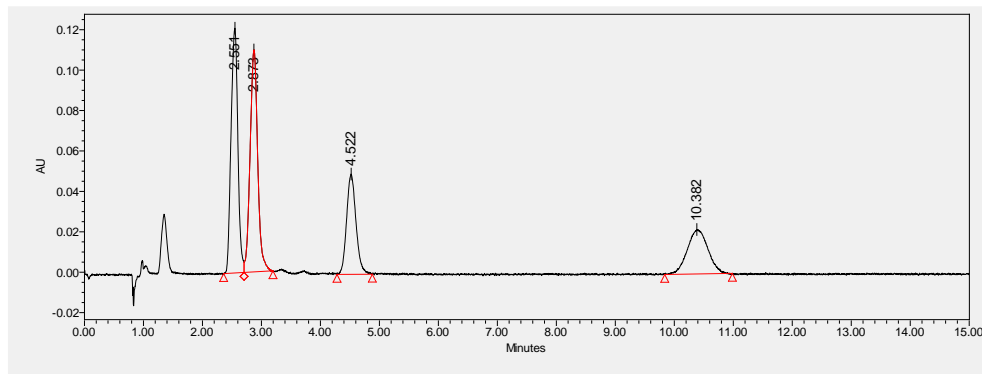

|   | Retention Time | Area   | % Area |
|---|----------------|--------|--------|
| 1 | 2.551          | 970093 | 31.99  |
| 2 | 2.873          | 981502 | 32.36  |

|   |        |        |       |
|---|--------|--------|-------|
| 3 | 4.522  | 547300 | 18.05 |
| 4 | 10.382 | 533793 | 17.60 |

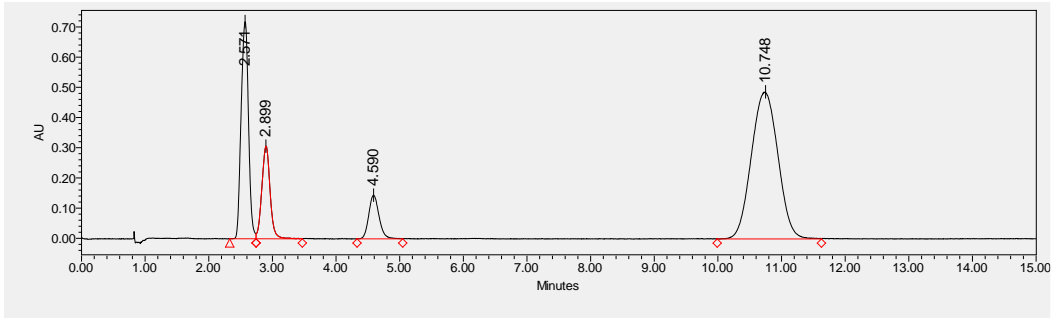

|   | Retention Time | Area     | % Area |
|---|----------------|----------|--------|
| 1 | 2.571          | 5777650  | 23.77  |
| 2 | 2.899          | 2771862  | 11.40  |
| 3 | 4.590          | 1620147  | 6.67   |
| 4 | 10.748         | 14134426 | 58.16  |

**(2*R*,3*S*)-1'-ethyl-7-fluoro-3-(2-oxo-2-phenylethyl)-3*H*-spiro[benzofuran-2,3'-indolin]-2'-one (C37):**

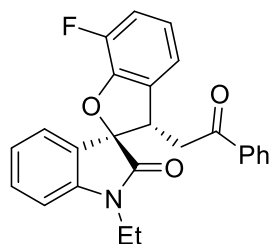

Yellow solid, 91% yield, 89:11 er, 61:39 dr, m.p. 62-66 °C, Reacted for 108 h.

**SFC** Daicel Chiralcel OD-3, CO<sub>2</sub>/MeOH = 85/15, 1.5 mL/min, λ = 240 nm, t<sub>1</sub> = 3.40 min, t<sub>2</sub> = 3.84 min, t<sub>3</sub> = 5.63 min, t<sub>4</sub> = 7.07 min.

**minor product**

[α]<sub>D</sub><sup>20</sup> = -67.6 (c = 0.12, in CH<sub>2</sub>Cl<sub>2</sub>).

**<sup>1</sup>H NMR** (400 MHz, Chloroform-*d*) δ 7.89 (d, *J* = 7.7 Hz, 2H), 7.55 (t, *J* = 7.4 Hz, 1H), 7.43 (t, *J* = 7.7 Hz, 2H), 7.37 (t, *J* = 7.8 Hz, 1H), 7.29 (d, *J* = 7.4 Hz, 1H), 7.09 – 6.96 (m, 3H), 6.91 (dt, *J* = 8.0, 4.0 Hz, 1H), 6.88 (d, *J* = 7.7 Hz, 1H), 4.51 (dd, *J* = 9.2, 5.0 Hz, 1H), 3.99 (dd, *J* = 18.4, 9.3 Hz, 1H), 3.73 (dq, *J* = 14.4, 7.2 Hz, 1H), 3.54 (dq, *J* = 14.3, 7.2 Hz, 1H), 3.41 (dd, *J* = 18.4, 5.0 Hz, 1H), 1.20 (t, *J* = 7.2 Hz, 3H).

**<sup>13</sup>C NMR** (101 MHz, Chloroform-*d*) δ 198.0, 172.1, 147.7 (d, *J* = 247.1 Hz), 145.6 (d, *J* = 10.8 Hz), 142.7, 136.5, 133.5, 132.9 (d, *J* = 2.8 Hz), 130.8, 130.0, 128.8, 128.2, 123.7, 123.5, 122.2 (d, *J* = 5.6 Hz), 119.8 (d, *J* = 3.4 Hz), 116.4 (d, *J* = 16.9 Hz), 108.8, 88.9, 46.5, 41.1, 34.9, 12.5.

**<sup>19</sup>F NMR** (376 MHz, Chloroform-*d*) δ -137.50.

**HRMS** (ESI) *m/z*: [M + Na]<sup>+</sup> Calculated for [C<sub>25</sub>H<sub>30</sub>FNO<sub>3</sub>Na<sup>+</sup>]: 424.1319 found 424.1322.

**IR** (neat) 2925, 2854, 1722, 1683, 1614, 1487, 1371, 1262, 1212, 1022, 754, 689 cm<sup>-1</sup>.

**major product**

[α]<sub>D</sub><sup>20</sup> = -47.1 (c = 0.07, in CH<sub>2</sub>Cl<sub>2</sub>).

**<sup>1</sup>H NMR** (400 MHz, Chloroform-*d*) δ 7.62 (d, *J* = 7.4 Hz, 2H), 7.48 (t, *J* = 7.4 Hz, 1H), 7.33 (t, *J* = 7.7 Hz, 2H), 7.14 (td, *J* = 7.8, 1.3 Hz, 1H), 7.09 (d, *J* = 7.4 Hz, 1H), 7.05 – 6.96 (m, 2H), 6.94 – 6.90 (m, 1H), 6.78 (t, *J* = 7.5 Hz, 1H), 6.73 (d, *J* = 7.9 Hz, 1H), 4.68 (t, *J* = 7.6 Hz, 1H), 3.92 (dq, *J* = 14.5, 7.2 Hz, 1H), 3.74 (dq, *J* = 14.3, 7.2 Hz, 1H), 3.53 – 3.44 (m, 2H), 1.38 (t, *J* = 7.2 Hz, 3H).

**<sup>13</sup>C NMR** (101 MHz, Chloroform-*d*) δ 196.7, 174.4, 147.6 (d, *J* = 246.9 Hz) 145.5 (d, *J* = 10.8 Hz), 143.8, 136.2, 133.3, 132.5 (d, *J* = 2.8 Hz), 130.9, 128.6, 127.7, 125.2, 125.1, 122.2, 122.1 (d, *J* = 5.4 Hz), 119.3 (d, *J* = 3.5 Hz), 116.4 (d, *J* = 17.0 Hz), 109.1, 90.2, 44.6, 40.4, 35.2, 12.4.

**<sup>19</sup>F NMR** (376 MHz, Chloroform-*d*) δ -137.75.

**HRMS** (ESI) *m/z*: [M + Na]<sup>+</sup> Calculated for [C<sub>25</sub>H<sub>30</sub>FNO<sub>3</sub>Na<sup>+</sup>]: 424.1319 found 424.1329.

**IR** (neat) 3059, 2980, 1724, 1683, 1610, 1477, 1369, 1262, 1212, 1024, 755, 693 cm<sup>-1</sup>.

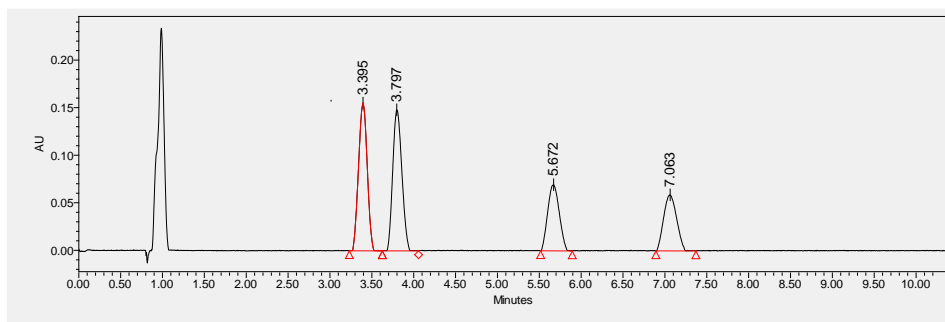

|   | Retention Time | Area    | % Area |
|---|----------------|---------|--------|
| 1 | 3.395          | 1118560 | 31.62  |

|   |       |         |       |
|---|-------|---------|-------|
| 2 | 3.797 | 1121310 | 31.70 |
| 3 | 5.672 | 666627  | 18.84 |
| 4 | 7.063 | 631174  | 17.84 |

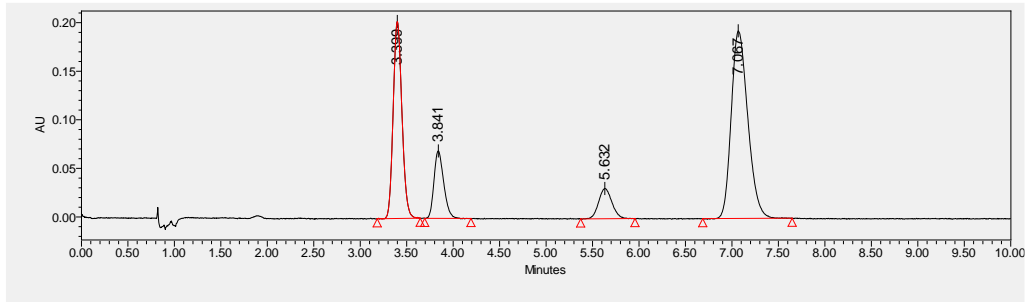

|   | Retention Time | Area    | % Area |
|---|----------------|---------|--------|
| 1 | 3.399          | 1329279 | 29.34  |
| 2 | 3.841          | 504561  | 11.14  |
| 3 | 5.632          | 310082  | 6.84   |
| 4 | 7.067          | 2386550 | 52.68  |



**(2*R*,3*S*)-1'-ethyl-7-methyl-3-(2-oxo-2-phenylethyl)-3*H*-spiro[benzofuran-2,3'-indolin]-2'-one (C38):**

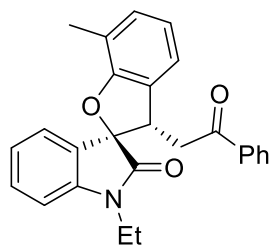

White solid, 98% yield, 91:9 er, >19:1 dr, m.p. 74-75 °C,  $[\alpha]_D^{20} = -15.4$  ( $c = 0.76$ , in  $\text{CH}_2\text{Cl}_2$ ). Reacted for 144 h.

**SFC** Daicel Chiralcel OD-3,  $\text{CO}_2/\text{MeOH} = 85/15$ , 1.5 mL/min,  $\lambda = 240$  nm,  $t_1 = 3.33$  min,  $t_2 = 3.61$  min,  $t_3 = 5.74$  min,  $t_4 = 7.43$  min.

**$^1\text{H NMR}$**  (400 MHz, Chloroform-*d*)  $\delta$  7.64 – 7.57 (m, 2H), 7.46 (t,  $J = 7.4$  Hz, 1H), 7.31 (t,  $J = 7.7$  Hz, 2H), 7.11 (td,  $J = 7.8, 1.1$  Hz, 1H), 7.06 – 7.02 (m, 3H), 6.88 (t,  $J = 7.5$  Hz, 1H), 6.80 – 6.70 (m, 2H), 4.64 (t,  $J = 7.6$  Hz, 1H), 3.99 – 3.90 (m, 1H), 3.75 – 3.66 (m, 1H), 3.43 (d,  $J = 7.6$  Hz, 2H), 2.20 (s, 3H), 1.38 (t,  $J = 7.2$  Hz, 3H).

**$^{13}\text{C NMR}$**  (101 MHz, Chloroform-*d*)  $\delta$  197.0, 175.3, 157.4, 143.6, 136.3, 133.1, 130.5, 130.3, 128.5, 128.0, 127.6, 126.2, 124.9, 122.0, 121.2, 121.1, 120.4, 108.9, 88.8, 44.8, 40.4, 35.1, 15.3, 12.4.

**HRMS** (ESI)  $m/z$ :  $[\text{M} + \text{Na}]^+$  Calculated for  $[\text{C}_{26}\text{H}_{23}\text{NO}_3\text{Na}]^+$ : 420.1570 found 420.1570.

**IR** (neat) 3057, 2980, 1727, 1683, 1609, 1462, 1367, 1321, 1208, 861, 756, 691  $\text{cm}^{-1}$ .

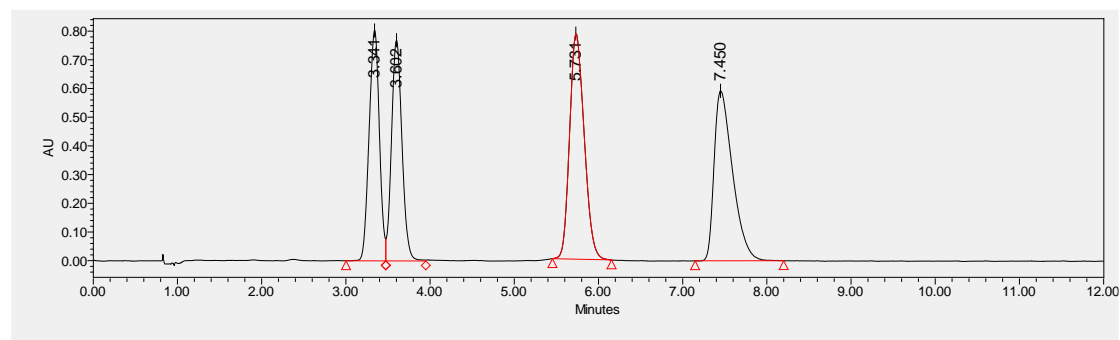

|   | Retention Time | Area    | % Area |
|---|----------------|---------|--------|
| 1 | 3.341          | 6818954 | 21.34  |
| 2 | 3.602          | 6660961 | 20.85  |
| 3 | 5.731          | 9462807 | 29.62  |
| 4 | 7.450          | 9007550 | 28.19  |

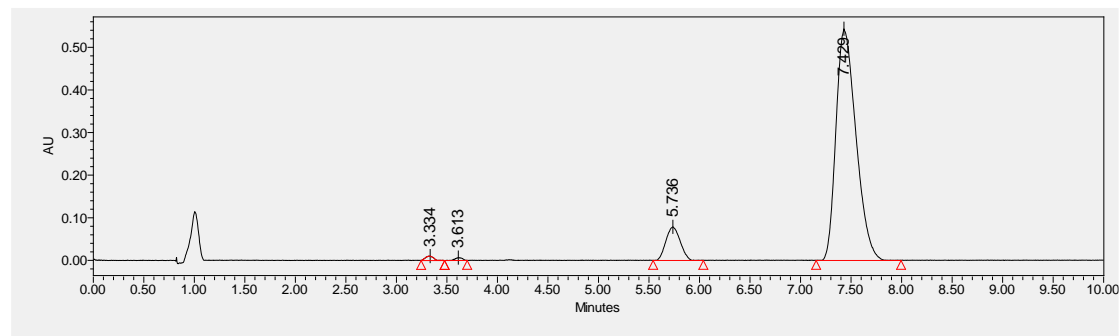

|   | Retention Time | Area    | % Area |
|---|----------------|---------|--------|
| 1 | 3.334          | 58768   | 0.71   |
| 2 | 3.613          | 35154   | 0.42   |
| 3 | 5.736          | 772112  | 9.27   |
| 4 | 7.429          | 7463133 | 89.60  |

**(3*R*,7'*S*)-1-ethyl-7'-(2-oxo-2-phenylethyl)-7'*H*-spiro[indoline-3,6'-[1,3]dioxolo[4,5-*f*]benzofuran]-2-one (C39):**

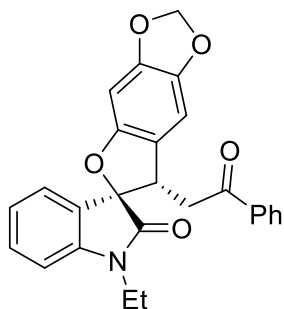

Yellow solid, 99% yield, 93:7 er, >19:1 dr, m.p. 77-81 °C,  $[\alpha]_D^{20} = -50.0$  ( $c = 0.80$ , in  $\text{CH}_2\text{Cl}_2$ ). Reacted for 108 h.

**SFC** Daicel Chiralpak IA-3,  $\text{CO}_2/\text{MeOH} = 85/15$ , 1.5 mL/min,  $\lambda = 240$  nm,  $t_1 = 12.26$  min,  $t_2 = 14.85$  min.

**$^1\text{H NMR}$**  (400 MHz, Chloroform-*d*)  $\delta$  7.61 (d,  $J = 7.4$  Hz, 2H), 7.47 (t,  $J = 7.4$  Hz, 1H), 7.32 (t,  $J = 7.7$  Hz, 2H), 7.17 – 7.10 (m, 2H), 6.79 (t,  $J = 7.5$  Hz, 1H), 6.72 (d,  $J = 8.1$  Hz, 1H), 6.67 (s, 1H), 6.45 (s, 1H), 5.93 (d,  $J = 10.5$  Hz, 2H), 4.54 (dd,  $J = 9.2, 5.8$  Hz, 1H), 3.94 – 3.85 (m, 1H), 3.73 (dt,  $J = 14.2, 7.2$  Hz, 1H), 3.47 – 3.29 (m, 2H), 1.35 (t,  $J = 7.2$  Hz, 3H).

**$^{13}\text{C NMR}$**  (101 MHz, Chloroform-*d*)  $\delta$  196.6, 174.9, 153.3, 148.1, 143.5, 142.4, 136.3, 133.2, 130.6, 128.5, 127.6, 125.8, 124.9, 122.1, 119.6, 109.0, 104.1, 101.5, 93.7, 89.7, 44.4, 40.6, 35.0, 12.4.

**HRMS** (ESI)  $m/z$ :  $[\text{M} + \text{Na}]^+$  Calculated for  $[\text{C}_{26}\text{H}_{21}\text{NO}_5\text{Na}^+]$ : 450.1312 found 450.1314.

**IR** (neat) 3060, 2980, 2886, 1726, 1611, 1465, 1367, 1259, 1215, 1150, 936, 753, 692  $\text{cm}^{-1}$ .

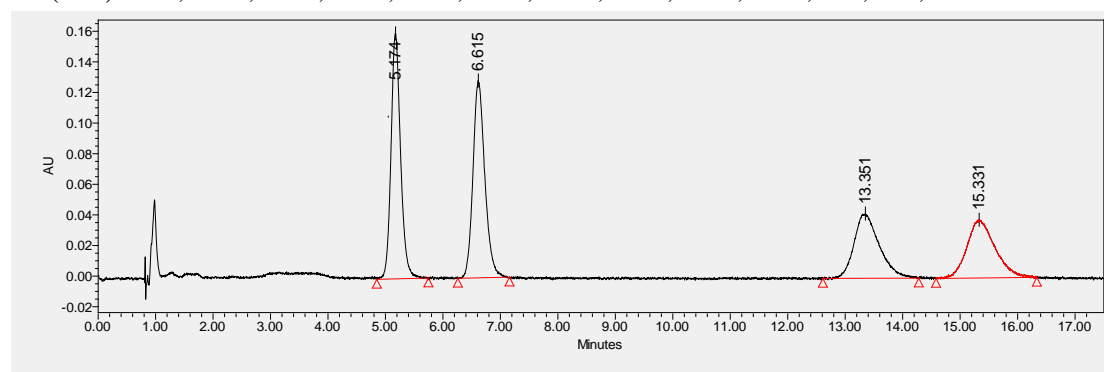

|   | Retention Time | Area    | % Area |
|---|----------------|---------|--------|
| 1 | 5.174          | 1853709 | 29.58  |
| 2 | 6.615          | 1846917 | 29.47  |
| 3 | 13.351         | 1282511 | 20.47  |
| 4 | 15.331         | 1283116 | 20.48  |

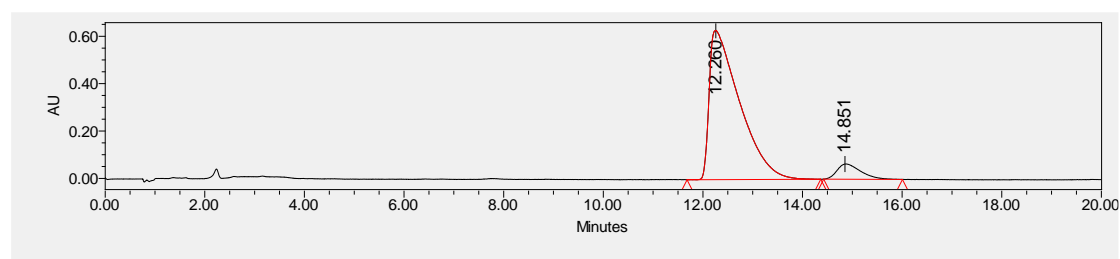

|   | Retention Time | Area     | % Area |
|---|----------------|----------|--------|
| 1 | 12.260         | 26581167 | 92.55  |
| 2 | 14.851         | 2138727  | 7.45   |

**(3*R*,3'*S*)-1-ethyl-3'-(2-oxo-2-phenylethyl)-3'*H*-spiro[indoline-3,2'-naphtho[1,2-*b*]furan]-2-one (C40):**

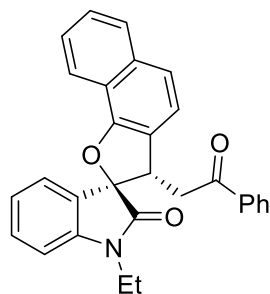

White solid, 99% yield, 86:14 er, 90:10 dr, m.p. 86-90 °C, Reacted for 108 h.

**SFC** Daicel Chiralcel OD-3, CO<sub>2</sub>/MeOH = 85/15, 1.5 mL/min, λ = 240 nm, t<sub>1</sub> = 8.77 min, t<sub>2</sub> = 12.96 min, t<sub>3</sub> = 17.62 min, t<sub>4</sub> = 22.53 min.

**minor product**

[α]<sub>D</sub><sup>21</sup> = -42.8 (c = 0.08, in CH<sub>2</sub>Cl<sub>2</sub>).

**<sup>1</sup>H NMR** (400 MHz, Chloroform-*d*) δ 7.96 (d, *J* = 7.5 Hz, 1H), 7.91 (d, *J* = 7.3 Hz, 2H), 7.87 – 7.82 (m, 1H), 7.58 – 7.49 (m, 2H), 7.49 – 7.40 (m, 4H), 7.39 – 7.33 (m, 2H), 7.24 (d, *J* = 7.4 Hz, 1H), 7.01 (t, *J* = 7.3 Hz, 1H), 6.92 (d, *J* = 7.9 Hz, 1H), 4.60 (dd, *J* = 10.0, 4.2 Hz, 1H), 4.14 (dd, *J* = 18.5, 10.0 Hz, 1H), 3.81 (dq, *J* = 14.4, 7.2 Hz, 1H), 3.56 (dq, *J* = 14.3, 7.2 Hz, 1H), 3.45 (dd, *J* = 18.5, 4.3 Hz, 1H), 1.23 (t, *J* = 7.2 Hz, 3H).

**<sup>13</sup>C NMR** (101 MHz, Chloroform-*d*) δ 198.6, 172.8, 154.5, 142.6, 136.7, 134.6, 133.4, 131.4, 130.5, 128.8, 128.2, 128.0, 126.4, 125.8, 123.4, 123.4, 122.1, 122.1, 121.8, 121.6, 120.9, 108.7, 88.2, 47.4, 41.6, 34.9, 29.9, 12.6.

**HRMS** (ESI) *m/z*: [M + Na]<sup>+</sup> Calculated for [C<sub>29</sub>H<sub>23</sub>NO<sub>3</sub>Na<sup>+</sup>]: 456.1570 found 456.1576.

**IR** (neat) 3058, 2923, 1721, 1681, 1613, 1370, 1275, 1095, 806, 752, 689 cm<sup>-1</sup>.

**major product**

[α]<sub>D</sub><sup>20</sup> = 60.9 (c = 0.28, in CH<sub>2</sub>Cl<sub>2</sub>).

**<sup>1</sup>H NMR** (400 MHz, Chloroform-*d*) δ 7.94 (d, *J* = 7.6 Hz, 1H), 7.84 (d, *J* = 7.5 Hz, 1H), 7.63 (d, *J* = 7.4 Hz, 2H), 7.51 – 7.40 (m, 4H), 7.40 – 7.31 (m, 3H), 7.12 (t, *J* = 7.8 Hz, 1H), 7.07 (d, *J* = 7.3 Hz, 1H), 6.77 – 6.71 (m, 2H), 4.84 (t, *J* = 7.6 Hz, 1H), 3.98 (dq, *J* = 14.4, 7.2 Hz, 1H), 3.76 (dq, *J* = 14.3, 7.2 Hz, 1H), 3.54 (d, *J* = 7.6 Hz, 2H), 1.42 (t, *J* = 7.2 Hz, 3H).

**<sup>13</sup>C NMR** (101 MHz, Chloroform-*d*) δ 197.1, 175.3, 154.5, 143.8, 136.4, 134.6, 133.2, 130.6, 128.5, 127.9, 127.7, 126.3, 126.1, 125.7, 125.2, 122.1, 122.1, 121.6, 121.4, 121.4, 120.7, 109.0, 89.7, 45.5, 40.7, 35.2, 12.5.

**HRMS** (ESI) *m/z*: [M + K]<sup>+</sup> Calculated for [C<sub>29</sub>H<sub>23</sub>NO<sub>3</sub>K<sup>+</sup>]: 472.1310 found 472.1317.

**IR** (neat) 3057, 2979, 1724, 1681, 1607, 1367, 1313, 1214, 1006, 806, 749, 694 cm<sup>-1</sup>.

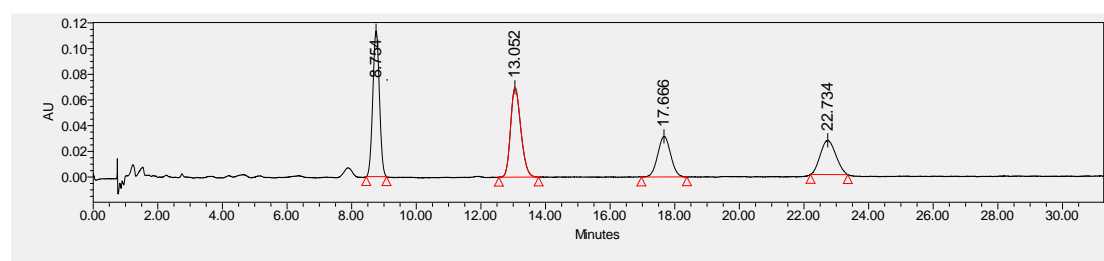

|   | Retention Time | Area   | % Area |
|---|----------------|--------|--------|
| 1 | 8.754          | 416446 | 32.33  |
| 2 | 13.052         | 401733 | 31.19  |
| 3 | 17.666         | 233184 | 18.10  |

|   |        |        |       |
|---|--------|--------|-------|
| 4 | 22.734 | 236683 | 18.38 |
|---|--------|--------|-------|

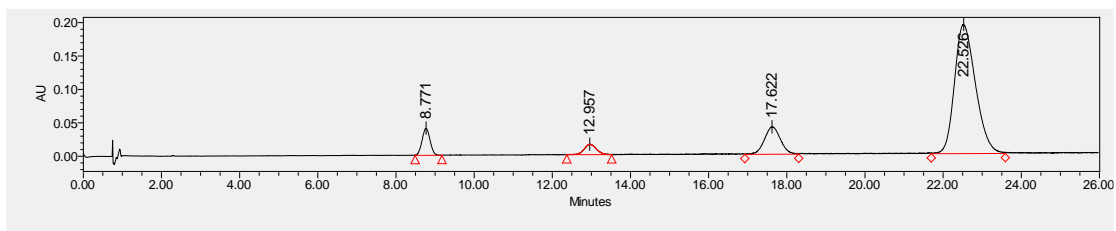

|   | Retention Time | Area    | % Area |
|---|----------------|---------|--------|
| 1 | 8.771          | 573763  | 6.18   |
| 2 | 12.957         | 334718  | 3.61   |
| 3 | 17.622         | 1168887 | 12.60  |
| 4 | 22.526         | 7200928 | 77.61  |

**(2*R*,3*S*)-1'-ethyl-3-(2-(4-fluorophenyl)-2-oxoethyl)-3*H*-spiro[benzofuran-2,3'-indolin]-2'-one (C41):**

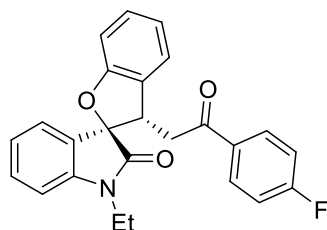

White solid, 91% yield, 96:4 er, >19:1 dr, m.p. 68-72 °C,  $[\alpha]_D^{20} = -42.9$  ( $c = 0.71$ , in  $\text{CH}_2\text{Cl}_2$ ). Reacted for 144 h.

**SFC** Daicel Chiralpak IB-3,  $\text{CO}_2/\text{MeOH} = 85/15$ , 1.5 mL/min,  $\lambda = 240$  nm,  $t_1 = 5.37$  min,  $t_2 = 5.77$  min.

**$^1\text{H NMR}$**  (400 MHz, Chloroform-*d*)  $\delta$  7.66 – 7.62 (m, 2H), 7.25 – 7.18 (m, 2H), 7.12 (td,  $J = 7.8, 1.0$  Hz, 1H), 7.05 (d,  $J = 7.3$  Hz, 1H), 7.02 – 6.94 (m, 3H), 6.88 (d,  $J = 8.0$  Hz, 1H), 6.80 – 6.68 (m, 2H),

4.64 (t,  $J = 7.6$  Hz, 1H), 3.95 – 3.87 (m, 1H), 3.77 – 3.68 (m, 1H), 3.49 – 3.38 (m, 2H), 1.36 (t,  $J = 7.2$  Hz, 3H).

**$^{13}\text{C NMR}$**  (101 MHz, Chloroform-*d*)  $\delta$  195.4, 175.0, 165.8 (d,  $J = 254.8$  Hz), 158.8, 143.6, 132.7 (d,  $J = 3.1$  Hz), 130.6, 130.3 (d,  $J = 9.3$  Hz), 129.1, 128.6, 125.7, 124.9, 123.9, 122.1, 121.4, 115.6 (d,  $J = 21.9$  Hz), 110.3, 109.0, 88.9, 44.5, 40.3, 35.1, 12.4.

**$^{19}\text{F NMR}$**  (376 MHz, Chloroform-*d*)  $\delta$  -105.10.

**HRMS** (ESI)  $m/z$ :  $[\text{M} + \text{Na}]^+$  Calculated for  $[\text{C}_{25}\text{H}_{20}\text{FNO}_3\text{Na}]^+$ : 424.1319 found 424.1320.

**IR** (neat) 3060, 2982, 1725, 1682, 1601, 1470, 1366, 1229, 996, 838, 750, 557  $\text{cm}^{-1}$ .

Racemate: 1:1.2 dr determined by UPCC analysis of the mixture. The racemate isolation by UPCC of each diastereomer as below:

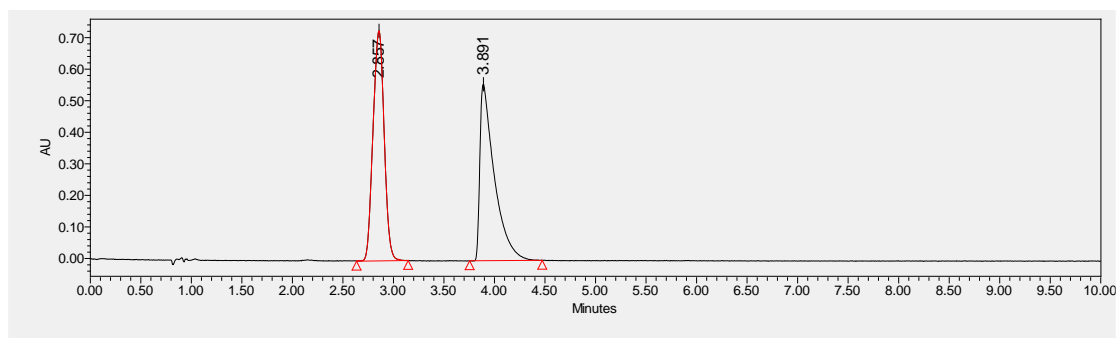

|   | Retention Time | Area    | % Area |
|---|----------------|---------|--------|
| 1 | 2.857          | 5576900 | 50.14  |
| 2 | 3.891          | 5546357 | 49.86  |

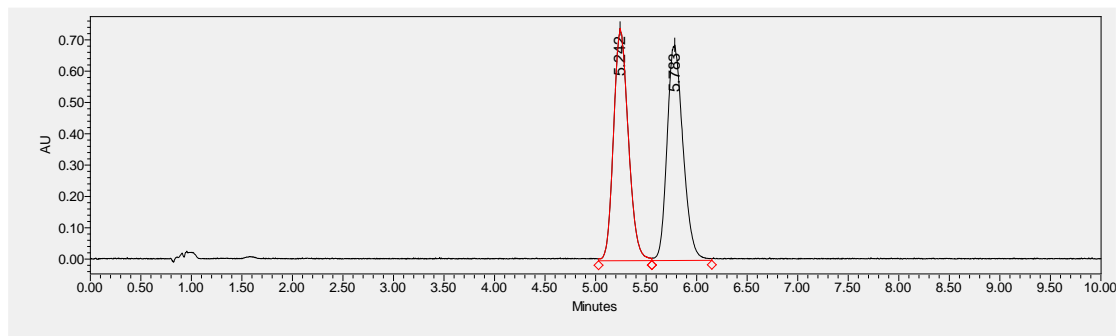

|   | Retention Time | Area    | % Area |
|---|----------------|---------|--------|
| 1 | 5.242          | 7520705 | 49.90  |
| 2 | 5.783          | 7549442 | 50.10  |

The UPCC spectra of asymmetric catalytic product as below:

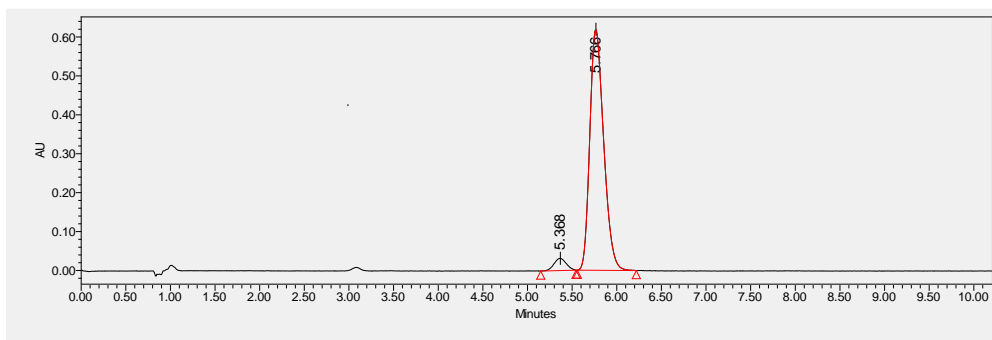

|   | Retention Time | Area    | % Area |
|---|----------------|---------|--------|
| 1 | 5.368          | 300951  | 4.31   |
| 2 | 5.766          | 6679790 | 95.69  |

**(2*R*,3*S*)-1'-ethyl-3-(2-(furan-2-yl)-2-oxoethyl)-3*H*-spiro[benzofuran-2,3'-indolin]-2'-one (C42):**

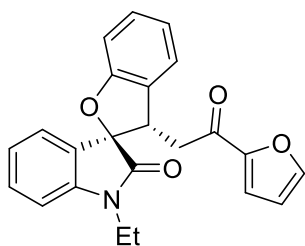

White solid, 51% yield, 95:5 er, >19:1 dr, m.p. 66-69 °C,  $[\alpha]^{20}_{\text{D}} = -8.1$  ( $c = 0.38$ , in  $\text{CH}_2\text{Cl}_2$ ). Reacted for 120 h.

**SFC** Daicel Chiralcel OD-3,  $\text{CO}_2/\text{MeOH} = 85/15$ , 1.5 mL/min,  $\lambda = 240$  nm,  $t_1 = 4.51$  min,  $t_2 = 5.38$  min.

**$^1\text{H}$  NMR** (400 MHz, Chloroform-*d*)  $\delta$  7.47 – 7.41 (m, 1H), 7.24 – 7.14 (m, 3H), 7.10 (d,  $J = 7.4$  Hz, 1H), 7.00 – 6.93 (m, 1H), 6.92 – 6.86 (m, 2H), 6.85 – 6.80 (m, 1H), 6.74 (d,  $J = 7.9$  Hz, 1H), 6.40 (dd,  $J = 3.6, 1.7$  Hz, 1H), 4.61 (dd,  $J = 10.2, 6.2$  Hz, 1H), 3.85 (dd,  $J = 14.2, 7.2$  Hz, 1H), 3.79 – 3.72 (m, 1H), 3.38 – 3.18 (m, 2H), 1.33 (t,  $J = 7.2$  Hz, 3H).

**$^{13}\text{C}$  NMR** (101 MHz, Chloroform-*d*)  $\delta$  185.9, 174.9, 158.8, 152.1, 146.3, 143.6, 130.7, 129.0, 128.7, 125.7, 125.1, 124.0, 122.1, 121.4, 116.8, 112.2, 110.2, 109.0, 88.9, 44.1, 40.0, 35.1, 12.4.

**HRMS** (ESI)  $m/z$ :  $[\text{M} + \text{Na}]^+$  Calculated for  $[\text{C}_{23}\text{H}_{19}\text{NO}_4\text{Na}^+]$ : 396.1206 found 396.1202.

**IR** (neat) 2980, 1728, 1673, 1611, 1469, 1369, 1236, 1020, 754, 692  $\text{cm}^{-1}$ .

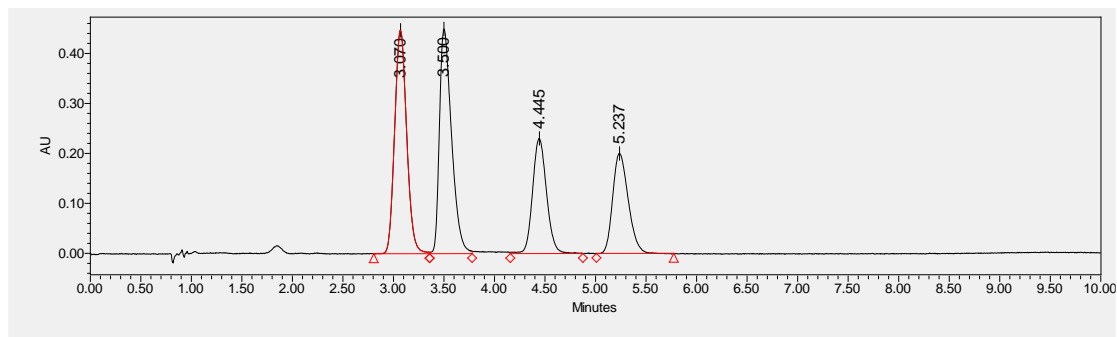

|   | Retention Time | Area    | % Area |
|---|----------------|---------|--------|
| 1 | 3.070          | 3705971 | 31.41  |
| 2 | 3.500          | 3748374 | 31.77  |
| 3 | 4.445          | 2211019 | 18.74  |
| 4 | 5.237          | 2133650 | 18.08  |

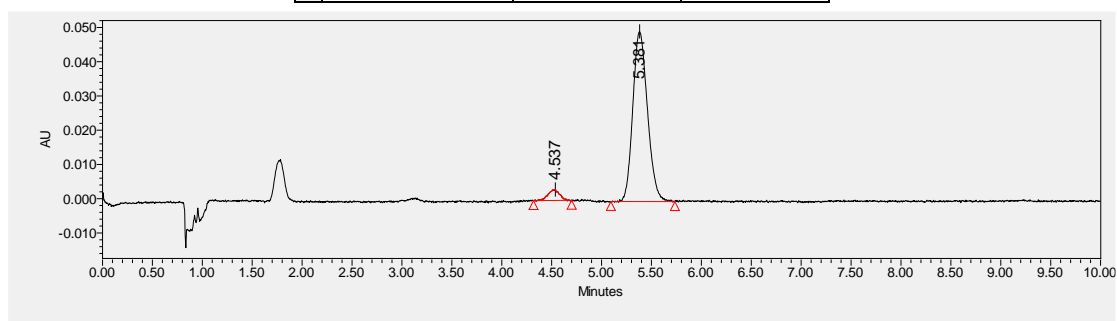

|   | Retention Time | Area   | % Area |
|---|----------------|--------|--------|
| 1 | 4.508          | 29520  | 4.95   |
| 2 | 5.382          | 566392 | 95.05  |

**(2R,3S)-1'-ethyl-3-(2-oxobutyl)-3H-spiro[benzofuran-2,3'-indolin]-2'-one (C43):**

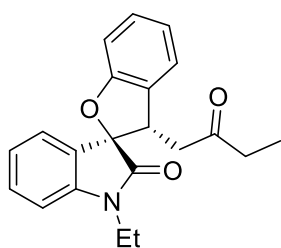

White solid, 84% yield, 88:12 er, >19:1 dr, m.p. 149-153 °C,  $[\alpha]^{20}_D = -54.5$  (c = 1.07, in CH<sub>2</sub>Cl<sub>2</sub>). Reacted for 120 h.

**SFC** Daicel Chiralcel OX-3, CO<sub>2</sub>/MeOH = 85/15, 1.5 mL/min,  $\lambda = 240$  nm,  $t_1 = 9.39$  min,  $t_2 = 13.17$  min.

**<sup>1</sup>H NMR** (400 MHz, Chloroform-*d*)  $\delta$  7.30 (td,  $J = 7.8, 1.1$  Hz, 1H), 7.19 (t,  $J = 7.7$  Hz, 1H), 7.12 – 7.06 (m, 2H), 6.94 (t,  $J = 7.5$  Hz, 2H), 6.83 (dd,  $J = 15.1, 7.9$  Hz, 2H), 4.47 (dd,  $J = 10.8, 4.8$  Hz, 1H), 3.87 (dq,

$J = 14.5, 7.3$  Hz, 1H), 3.73 (dq,  $J = 14.3, 7.2$  Hz, 1H), 3.03 – 2.76 (m, 2H), 2.19 – 2.01 (m, 1H), 1.76 – 1.66 (m, 1H), 1.35 (t,  $J = 7.2$  Hz, 3H), 0.69 (t,  $J = 7.3$  Hz, 3H).

**<sup>13</sup>C NMR** (101 MHz, Chloroform-*d*)  $\delta$  208.1, 175.0, 158.8, 143.8, 130.7, 128.9, 128.6, 125.8, 125.1, 123.7, 122.0, 121.3, 110.1, 108.9, 88.8, 44.0, 43.8, 35.5, 35.1, 12.4, 7.6.

**HRMS** (ESI)  $m/z$ : [M + Na]<sup>+</sup> Calculated for [C<sub>21</sub>H<sub>21</sub>NO<sub>3</sub>Na<sup>+</sup>]: 358.1414 found 358.1412.

**IR** (neat) 3050, 2976, 2936, 1721, 1607, 1468, 1367, 1237, 1107, 890, 749 cm<sup>-1</sup>.

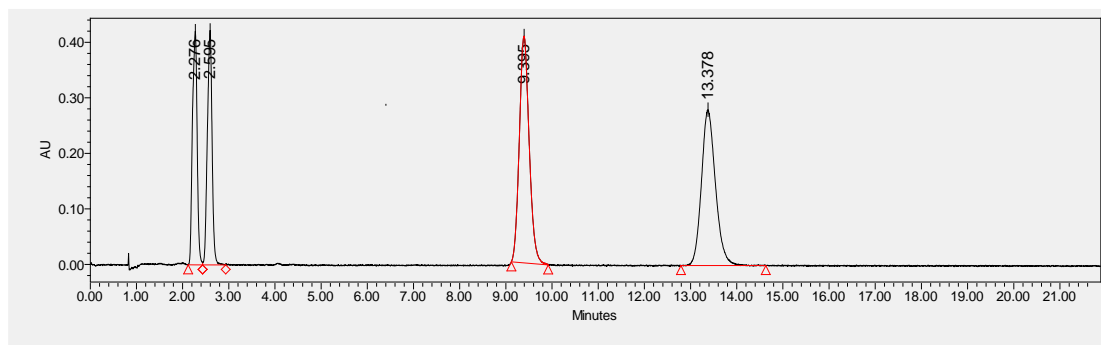

|   | Retention Time | Area    | % Area |
|---|----------------|---------|--------|
| 1 | 2.276          | 2961291 | 16.55  |
| 2 | 2.595          | 2986704 | 16.69  |
| 3 | 9.395          | 6041025 | 33.76  |
| 4 | 13.378         | 5906778 | 33.01  |

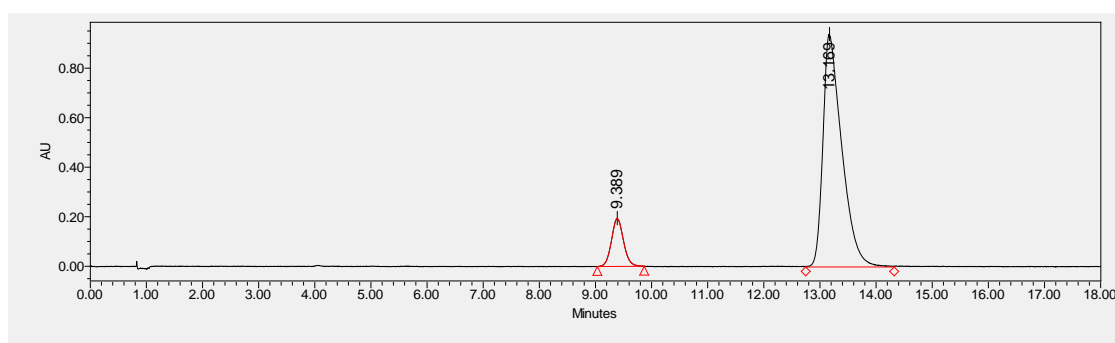

|   | Retention Time | Area     | % Area |
|---|----------------|----------|--------|
| 1 | 9.389          | 2882077  | 11.62  |
| 2 | 13.169         | 21930840 | 88.38  |



**(2*R*,3*S*)-3-(2-(3,4-dimethoxyphenyl)-2-oxoethyl)-1'-ethyl-3*H*-spiro[benzofuran-2,3'-indolin]-2'-one (C44):**

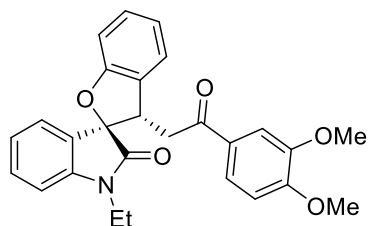

White solid, 99% yield, 93:7 er, >19:1 dr, m.p. 76-77 °C,  $[\alpha]_D^{21} = -26.0$  (c = 0.78, in CH<sub>2</sub>Cl<sub>2</sub>). Reacted for 120 h.

**SFC** Daicel Chiralcel OJ-3, CO<sub>2</sub>/MeOH = 85/15, 1.5 mL/min,  $\lambda = 240$  nm,  $t_1 = 4.19$  min,  $t_2 = 6.26$  min.

**<sup>1</sup>H NMR** (400 MHz, Chloroform-*d*)  $\delta$  7.26 (dd,  $J = 8.4, 1.9$  Hz, 1H), 7.24 – 7.18 (m, 3H), 7.14 (td,  $J = 7.8, 1.1$  Hz, 1H), 7.07 (d,  $J = 7.3$  Hz, 1H), 6.97 (t,  $J = 7.4$  Hz, 1H), 6.89 (d,  $J = 8.0$  Hz, 1H), 6.79 (t,  $J = 7.5$  Hz, 1H), 6.77 – 6.70 (m, 2H), 4.64 (t,  $J = 7.5$  Hz, 1H), 3.95 – 3.86 (m, 4H), 3.84 (s, 3H), 3.79 – 3.70 (m, 1H), 3.40 (d,  $J = 7.6$  Hz, 2H), 1.36 (t,  $J = 7.2$  Hz, 3H).

**<sup>13</sup>C NMR** (101 MHz, Chloroform-*d*)  $\delta$  195.5, 175.0, 158.8, 153.3, 148.8, 143.6, 130.6, 129.6, 129.0, 128.9, 125.8, 124.9, 122.3, 122.1, 121.4, 110.2, 109.9, 109.8, 108.9, 89.1, 56.1, 56.0, 44.5, 39.8, 35.0, 12.4.

**HRMS** (ESI)  $m/z$ :  $[M + Na]^+$  Calculated for [C<sub>27</sub>H<sub>25</sub>NO<sub>5</sub>Na<sup>+</sup>]: 466.1625 found 466.1620.

**IR** (neat) 2936, 1725, 1670, 1590, 1513, 1459, 1366, 1260, 1153, 1018, 905, 746 cm<sup>-1</sup>.

Racemate: 1:1 dr determined by UPCC analysis of the mixture. The racemate isolation by UPCC of each diastereomer as below:

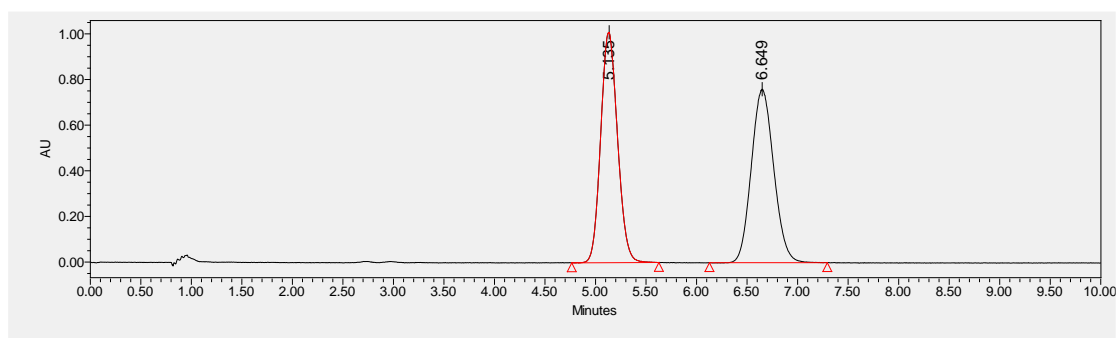

|   | Retention Time | Area     | % Area |
|---|----------------|----------|--------|
| 1 | 5.135          | 11675241 | 49.92  |
| 2 | 6.649          | 11710399 | 50.08  |

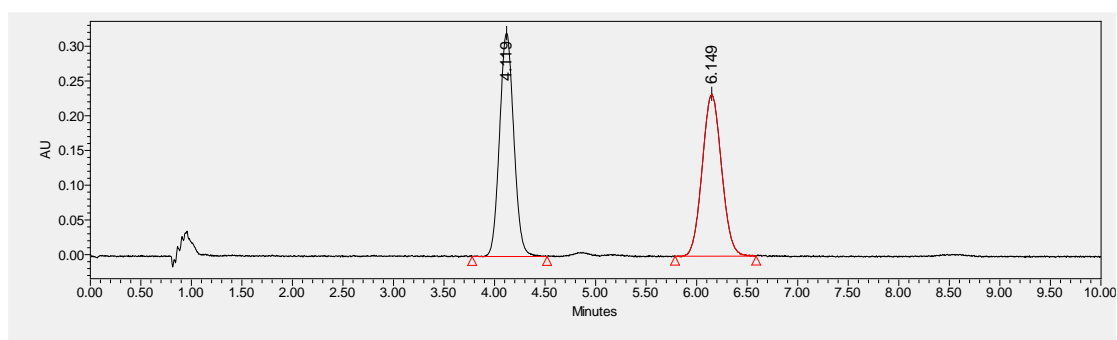

|   | Retention Time | Area    | % Area |
|---|----------------|---------|--------|
| 1 | 4.119          | 3144655 | 50.37  |
| 2 | 6.149          | 3098731 | 49.63  |

The UPCC spectra of asymmetric catalytic product as below:

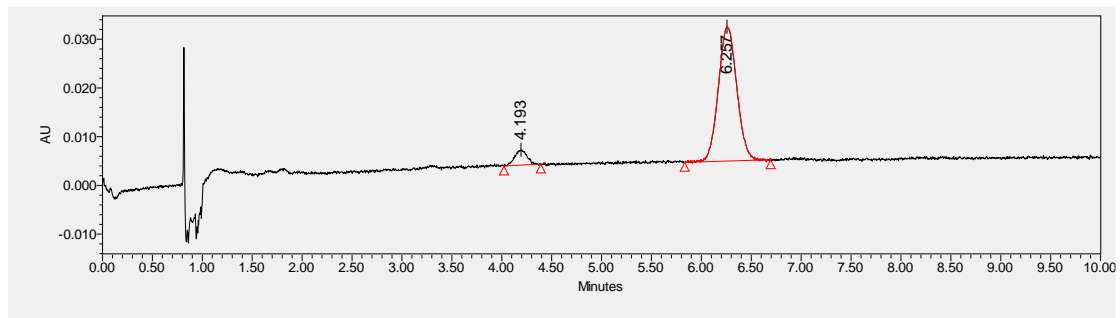

|   | Retention Time | Area   | % Area |
|---|----------------|--------|--------|
| 1 | 4.193          | 26988  | 7.08   |
| 2 | 6.257          | 354387 | 92.92  |

**(2*R*,3*S*)-1'-ethyl-3-(2-oxo-2-(thiophen-2-yl)ethyl)-3*H*-spiro[benzofuran-2,3'-indolin]-2'-one (C45):**

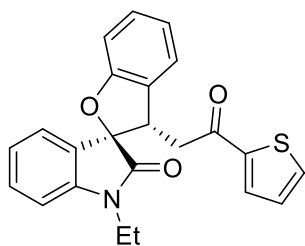

Yellow solid, 84% yield, 95:5 er, >19:1 dr, m.p. 68-72 °C,  $[\alpha]_D^{20} = -11.8$  (c = 0.64, in CH<sub>2</sub>Cl<sub>2</sub>). Reacted for 108 h.

**SFC** Daicel Chiralcel OJ-3, CO<sub>2</sub>/MeOH = 85/15, 1.5 mL/min,  $\lambda = 240$  nm,  $t_1 = 3.21$  min,  $t_2 = 8.23$  min.

**<sup>1</sup>H NMR** (400 MHz, Chloroform-*d*)  $\delta$  7.51 (d,  $J = 4.9$  Hz, 1H), 7.36 (d,  $J = 3.7$  Hz, 1H), 7.25 – 7.17 (m, 2H), 7.16 – 7.06 (m, 2H), 7.01 – 6.94 (m, 2H), 6.89 (d,  $J = 8.0$  Hz, 1H), 6.81 (t,  $J = 7.5$  Hz, 1H), 6.70 (d,  $J = 7.9$  Hz, 1H), 4.65 (dd,  $J = 9.2, 6.2$  Hz, 1H), 3.92 – 3.83 (m, 1H), 3.75 – 3.66 (m, 1H), 3.41 – 3.28 (m, 2H), 1.34 (t,  $J = 7.2$  Hz, 3H).

**<sup>13</sup>C NMR** (101 MHz, Chloroform-*d*)  $\delta$  189.5, 174.9, 158.9, 143.6, 143.3, 133.7, 131.7, 130.7, 129.1, 128.5, 127.9, 125.6, 125.0, 123.9, 122.1, 121.4, 110.3, 109.0, 88.9, 44.6, 40.7, 35.1, 12.4.

**HRMS** (ESI)  $m/z$ :  $[M + Na]^+$  Calculated for [C<sub>23</sub>H<sub>19</sub>NO<sub>3</sub>SNa<sup>+</sup>]: 412.0978 found 412.0981.

**IR** (neat) 3059, 2980, 2935, 1726, 1659, 1610, 1471, 1369, 1233, 857, 751 cm<sup>-1</sup>.

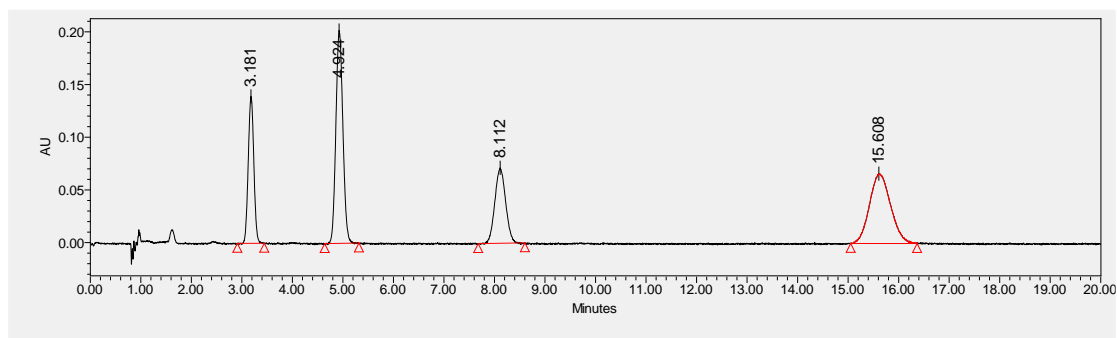

|   | Retention Time | Area    | % Area |
|---|----------------|---------|--------|
| 1 | 3.181          | 1072886 | 17.88  |
| 2 | 4.924          | 1943868 | 32.40  |
| 3 | 8.112          | 1061643 | 17.70  |
| 4 | 15.608         | 1920964 | 32.02  |

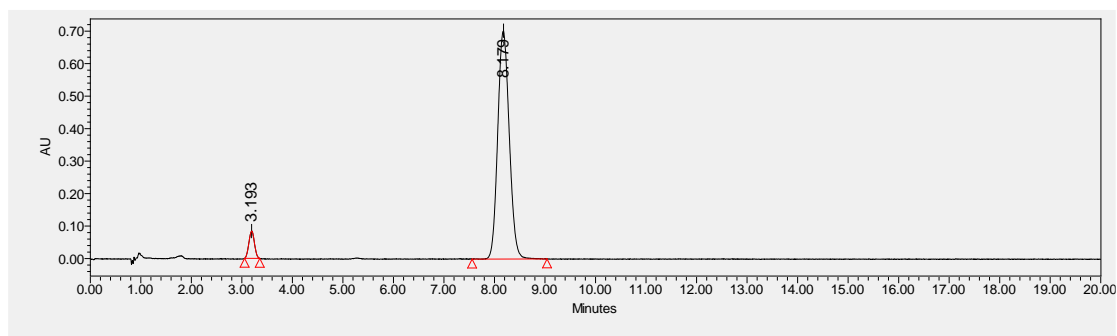

|   | Retention Time | Area     | % Area |
|---|----------------|----------|--------|
| 1 | 3.193          | 640472   | 5.44   |
| 2 | 8.179          | 11124298 | 94.56  |

**(2*R*,3*S*)-1'-ethyl-2'-oxo-3-(2-oxo-2-phenylethyl)-3*H*-spiro[benzofuran-2,3'-indolin]-5-yl 2-(1-(4-chlorobenzoyl)-5-methoxy-2-methyl-1*H*-indol-3-yl)acetate (C46):**

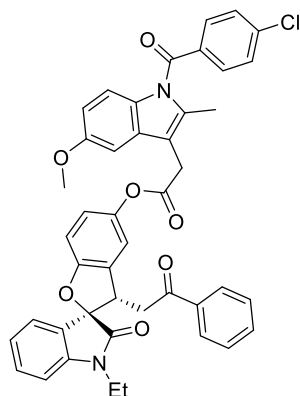

White solid, 75% yield, 90:10 er, 86:14 dr, m.p. 98-101 °C. Reacted for 120 h .

**SFC** Daicel Chiralcel OJ-3, CO<sub>2</sub>/EtOH = 80/20, 1.5 mL/min, λ = 240 nm, t<sub>1</sub> = 19.73 min, t<sub>2</sub> = 21.42 min, t<sub>3</sub> = 37.41 min, t<sub>4</sub> = 52.60 min.

**minor product**

[α]<sub>D</sub><sup>21</sup> = -29.4 (c = 0.12, in CH<sub>2</sub>Cl<sub>2</sub>).

**<sup>1</sup>H NMR** (400 MHz, Chloroform-*d*) δ 7.86 (d, *J* = 7.4 Hz, 2H), 7.68 (d, *J* = 8.5 Hz, 2H), 7.54 (t, *J* = 7.4 Hz, 1H), 7.47 (d, *J* = 8.5 Hz, 2H), 7.41 (t, *J* = 7.7 Hz, 2H), 7.38 – 7.33 (m, 1H), 7.28 – 7.26 (m, 1H), 7.08 – 7.02 (m, 2H), 6.96 – 6.83 (m, 5H), 6.69 (dd, *J* = 9.0, 2.5 Hz, 1H), 4.42 (dd, *J* = 9.3, 4.8 Hz, 1H), 3.99 (dd, *J* = 18.4, 9.4 Hz, 1H), 3.89 (s, 2H), 3.84 (s, 3H), 3.75 – 3.68 (m, 1H), 3.53 (dq, *J* = 14.3, 7.1 Hz, 1H), 3.34 (dd, *J* = 18.5, 4.8 Hz, 1H), 2.46 (s, 3H), 1.18 (t, *J* = 7.2 Hz, 3H).

**<sup>13</sup>C NMR** (101 MHz, Chloroform-*d*) δ 198.0, 172.5, 169.9, 168.5, 156.6, 156.3, 145.2, 142.6, 139.5, 136.4, 136.0, 134.0, 133.5, 131.4, 131.0, 130.7, 130.6, 130.4, 130.3, 129.3, 128.8, 128.2, 123.6, 123.5, 121.9, 117.9, 115.2, 112.2, 112.0, 110.5, 108.8, 101.4, 88.4, 55.9, 46.3, 41.1, 34.9, 30.7, 13.6, 12.5.

**HRMS** (ESI) *m/z*: [M + Na]<sup>+</sup> Calculated for [C<sub>44</sub>H<sub>35</sub><sup>35</sup>ClN<sub>2</sub>O<sub>7</sub>Na<sup>+</sup>]: 761.2025 found 761.2027.

**HRMS** (ESI) *m/z*: [M + Na]<sup>+</sup> Calculated for [C<sub>44</sub>H<sub>35</sub><sup>37</sup>ClN<sub>2</sub>O<sub>7</sub>Na<sup>+</sup>]: 763.1996 found 763.2020.

**IR** (neat) 2924, 2853, 1754, 1682, 1612, 1477, 1368, 1319, 1217, 1136, 1091, 995, 752, 690 cm<sup>-1</sup>.

**major product**

[α]<sub>D</sub><sup>21</sup> = -36.2 (c = 1.10, in CH<sub>2</sub>Cl<sub>2</sub>).

**<sup>1</sup>H NMR** (400 MHz, Chloroform-*d*) δ 7.68 (d, *J* = 8.4 Hz, 2H), 7.59 (d, *J* = 7.7 Hz, 2H), 7.48 – 7.44 (m, 3H), 7.31 (t, *J* = 7.7 Hz, 2H), 7.12 (t, *J* = 7.8 Hz, 1H), 7.08 – 7.03 (m, 2H), 6.95 – 6.86 (m, 3H), 6.82 (d, *J* = 8.6 Hz, 1H), 6.76 (t, *J* = 7.5 Hz, 1H), 6.74 – 6.67 (m, 2H), 4.61 (dd, *J* = 10.0, 4.8 Hz, 1H), 3.95 – 3.84 (m, 3H), 3.84 (s, 3H), 3.77 – 3.68 (m, 1H), 3.49 – 3.32 (m, 2H), 2.46 (s, 3H), 1.36 (t, *J* = 7.2 Hz, 3H).

**<sup>13</sup>C NMR** (101 MHz, Chloroform-*d*) δ 196.7, 174.7, 169.9, 168.5, 156.5, 156.3, 145.1, 143.6, 139.5, 136.4, 136.1, 134.0, 133.3, 131.3, 131.0, 130.8, 130.7, 129.9, 129.3, 128.5, 127.7, 125.4, 125.0, 122.2, 121.7, 117.4, 115.2, 112.2, 111.9, 110.2, 109.0, 101.5, 89.7, 76.8, 55.9, 44.4, 40.3, 35.1, 30.6, 13.6, 12.4.

**HRMS** (ESI) *m/z*: [M + Na]<sup>+</sup> Calculated for [C<sub>44</sub>H<sub>35</sub><sup>35</sup>ClN<sub>2</sub>O<sub>7</sub>Na<sup>+</sup>]: 761.2025 found 761.2018.

**HRMS** (ESI) *m/z*: [M + Na]<sup>+</sup> Calculated for [C<sub>44</sub>H<sub>35</sub><sup>37</sup>ClN<sub>2</sub>O<sub>7</sub>Na<sup>+</sup>]: 763.1996 found 763.2005.

**IR** (neat) 3061, 2934, 1728, 1682, 1609, 1477, 1363, 1319, 1212, 1140, 997, 754, 692 cm<sup>-1</sup>.

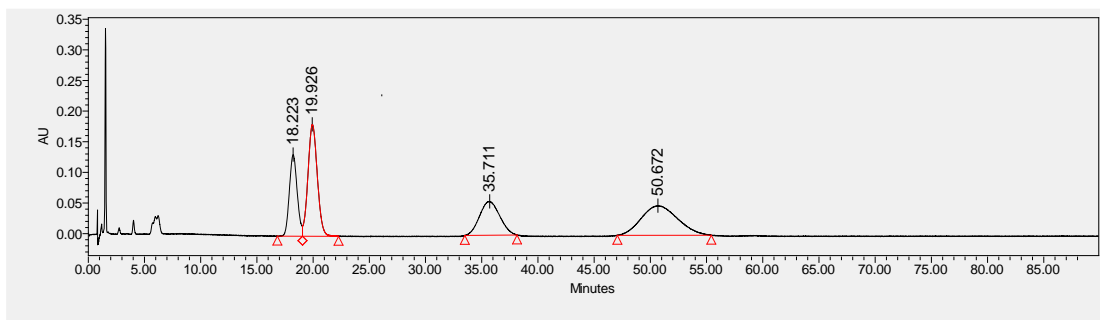

|   | Retention Time | Area     | % Area |
|---|----------------|----------|--------|
| 1 | 18.223         | 6426650  | 18.55  |
| 2 | 19.926         | 10528078 | 30.39  |
| 3 | 35.711         | 6860691  | 19.80  |
| 4 | 50.672         | 10828536 | 31.26  |

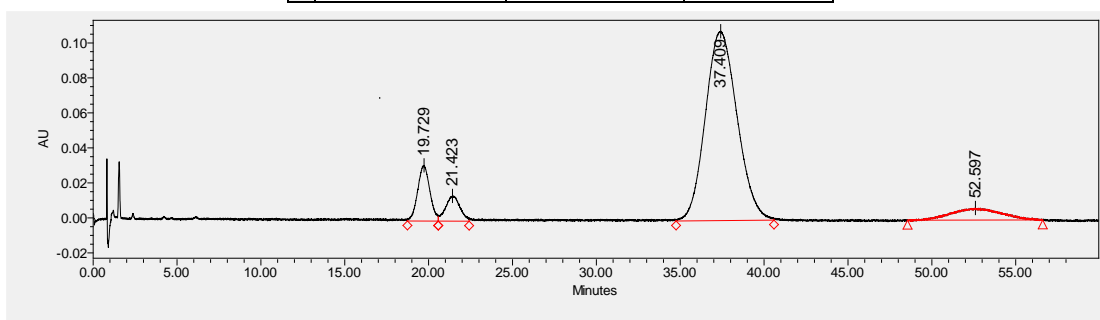

|   | Retention Time | Area     | % Area |
|---|----------------|----------|--------|
| 1 | 19.729         | 1595096  | 8.83   |
| 2 | 21.423         | 850001   | 4.70   |
| 3 | 37.409         | 14242023 | 78.83  |
| 4 | 52.597         | 1378853  | 7.63   |

**(2R,3S)-1'-ethyl-2'-oxo-3-(2-oxo-2-phenylethyl)-3H-spiro[benzofuran-2,3'-indolin]-5-yl 2-(4-(4-chlorobenzoyl)phenoxy)-2-methylpropanoate (C47):**

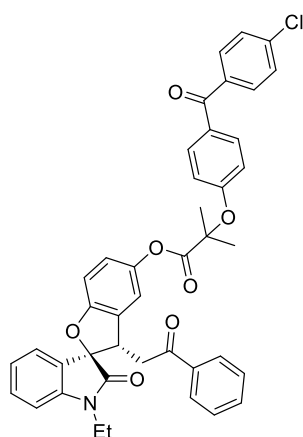

White solid, 89% yield, 92:8 er, 77:23 dr, m.p. 83-85 °C, Reacted for 120 h .

**SFC** Daicel Chiralcel OD-3, CO<sub>2</sub>/EtOH = 80/20, 1.5 mL/min, λ = 240 nm, t<sub>1</sub> = 7.25 min, t<sub>2</sub> = 7.88 min, t<sub>3</sub> = 12.22 min, t<sub>4</sub> = 13.41 min.

**minor product**

[α]<sub>D</sub><sup>21</sup> = -30.5 (c = 0.09, in CH<sub>2</sub>Cl<sub>2</sub>).

**<sup>1</sup>H NMR** (400 MHz, Chloroform-*d*) δ 7.85 (d, *J* = 7.3 Hz, 2H), 7.81 – 7.75 (m, 2H), 7.73 – 7.67 (m, 2H), 7.53 (t, *J* = 7.4 Hz, 1H), 7.46 – 7.34 (m, 5H), 7.28 – 7.26 (m, 1H), 7.05 (t, *J* = 7.5 Hz, 1H), 6.99 (dd, *J* = 9.2, 2.2 Hz, 2H), 6.88 – 6.81 (m, 4H), 4.43 (dd, *J* = 9.0, 5.0 Hz, 1H), 3.97 (dd, *J* = 18.4, 9.2 Hz, 1H), 3.75 – 3.68 (m, 1H), 3.54 (dq, *J* = 14.3, 7.2 Hz, 1H), 3.34 (dd, *J* = 18.4, 5.0 Hz, 1H), 1.82 (s, 6H), 1.19 (t, *J* = 7.2 Hz, 3H).

**<sup>13</sup>C NMR** (101 MHz, Chloroform-*d*) δ 197.9, 194.3, 172.9, 172.4, 159.7, 156.8, 144.9, 142.6, 138.6, 136.5, 136.4, 133.5, 132.3, 131.3, 130.9, 130.7, 130.6, 130.2, 128.8, 128.7, 128.2, 123.6, 123.5, 121.6, 117.7, 117.5, 110.6, 108.8, 88.4, 79.6, 46.4, 41.1, 34.9, 29.8, 25.6, 12.5.

**HRMS** (ESI) *m/z*: [M + Na]<sup>+</sup> Calculated for [C<sub>42</sub>H<sub>34</sub><sup>35</sup>CINO<sub>7</sub>Na<sup>+</sup>]: 722.1916 found 722.1917.

**HRMS** (ESI) *m/z*: [M + Na]<sup>+</sup> Calculated for [C<sub>42</sub>H<sub>34</sub><sup>37</sup>CINO<sub>7</sub>Na<sup>+</sup>]: 724.1887 found 724.1907.

**IR** (neat) 2929, 2854, 1753, 1720, 1596, 1479, 1370, 1307, 1203, 1134, 996, 757, 689 cm<sup>-1</sup>.

**major product**

[α]<sub>D</sub><sup>21</sup> = -36.2 (c = 1.10, in CH<sub>2</sub>Cl<sub>2</sub>).

**<sup>1</sup>H NMR** (400 MHz, Chloroform-*d*) δ 7.85 – 7.75 (m, 2H), 7.73 – 7.64 (m, 2H), 7.62 – 7.53 (m, 2H), 7.50 – 7.38 (m, 3H), 7.32 (t, *J* = 7.8 Hz, 2H), 7.13 (td, *J* = 7.8, 1.3 Hz, 1H), 7.07 (dd, *J* = 7.4, 1.3 Hz, 1H), 7.04 – 6.96 (m, 2H), 6.89 – 6.69 (m, 5H), 4.62 (dd, *J* = 10.0, 4.9 Hz, 1H), 3.90 (dq, *J* = 14.4, 7.2 Hz, 1H), 3.73 (dq, *J* = 14.3, 7.2 Hz, 1H), 3.52 – 3.32 (m, 2H), 1.84 (s, 6H), 1.36 (t, *J* = 7.2 Hz, 3H).

**<sup>13</sup>C NMR** (101 MHz, Chloroform-*d*) δ 196.6, 194.3, 174.7, 172.9, 159.7, 156.7, 144.8, 143.6, 138.6, 136.4, 136.1, 133.3, 132.3, 131.3, 130.9, 130.8, 130.2, 128.7, 128.6, 127.7, 125.4, 125.0, 122.2, 121.4, 117.5, 117.1, 110.4, 109.1, 89.8, 79.6, 44.4, 40.3, 35.1, 25.7, 25.6, 12.4.

**HRMS** (ESI) *m/z*: [M + Na]<sup>+</sup> Calculated for [C<sub>42</sub>H<sub>34</sub><sup>35</sup>CINO<sub>7</sub>Na<sup>+</sup>]: 722.1916 found 722.1902.

**HRMS** (ESI) *m/z*: [M + Na]<sup>+</sup> Calculated for [C<sub>42</sub>H<sub>34</sub><sup>37</sup>CINO<sub>7</sub>Na<sup>+</sup>]: 724.1887 found 724.1890.

**IR** (neat) 3061, 2934, 1728, 1682, 1609, 1477, 1363, 1319, 1212, 1140, 997, 754, 692 cm<sup>-1</sup>.

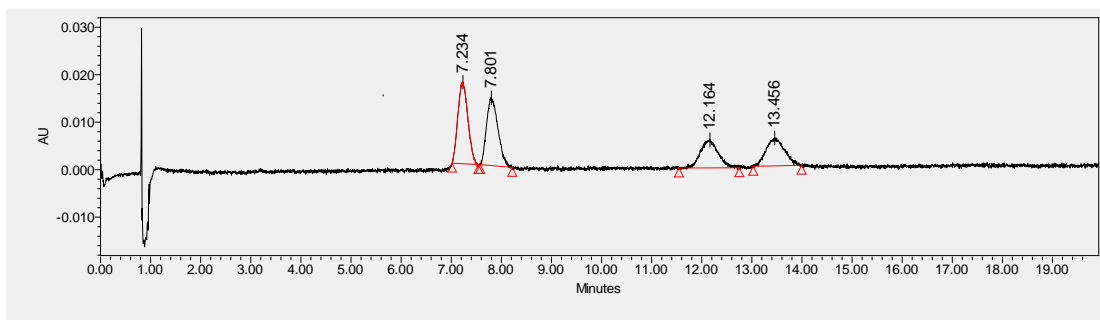

|   | Retention Time | Area   | % Area |
|---|----------------|--------|--------|
| 1 | 7.234          | 238228 | 31.45  |
| 2 | 7.801          | 224544 | 29.64  |
| 3 | 12.164         | 145336 | 19.19  |
| 4 | 13.456         | 149414 | 19.72  |

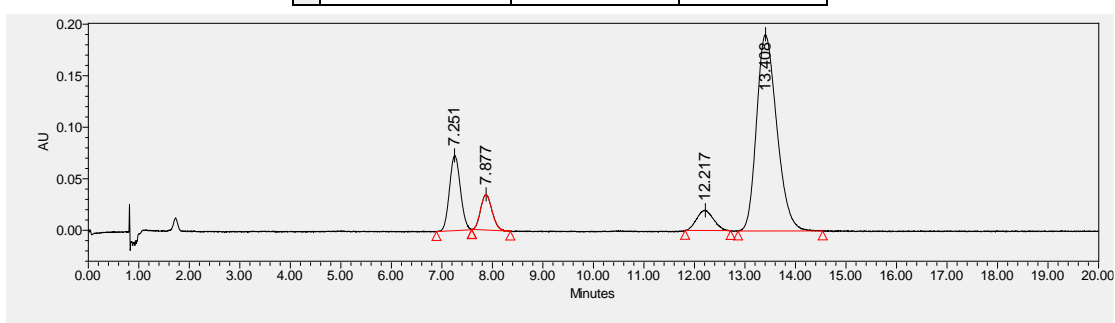

|   | Retention Time | Area    | % Area |
|---|----------------|---------|--------|
| 1 | 7.251          | 1092811 | 14.79  |
| 2 | 7.877          | 543774  | 7.36   |
| 3 | 12.217         | 450120  | 6.09   |
| 4 | 13.408         | 5301092 | 71.75  |

**(2R,3S)-1'-ethyl-2'-oxo-3-(2-oxo-2-phenylethyl)-3H-spiro[benzofuran-2,3'-indolin]-5-yl 2-((2,3-dimethylphenyl)amino)benzoate (C48):**

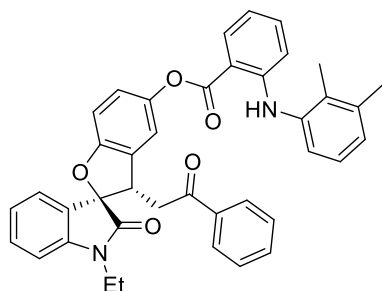

White solid, 64% yield, 91:9 er, 89:11 dr, m.p. 100-104 °C.  
Reacted for 120 h.

**SFC** Daicel Chiralcel OJ-3, CO<sub>2</sub>/EtOH = 80/20, 1.5 mL/min, λ = 240 nm, t<sub>1</sub> = 9.84 min, t<sub>2</sub> = 15.37 min, t<sub>3</sub> = 19.43 min, t<sub>4</sub> = 27.55 min.

**minor product**

[α]<sub>D</sub><sup>21</sup> = -45.7 (c = 0.07, in CH<sub>2</sub>Cl<sub>2</sub>).

**<sup>1</sup>H NMR** (400 MHz, Chloroform-*d*) δ 9.19 (s, 1H), 8.24 – 8.14 (m, 1H), 7.89 (d, *J* = 7.5 Hz, 2H), 7.53 (t, *J* = 7.4 Hz, 1H), 7.45 – 7.28 (m, 5H), 7.19 – 7.02 (m, 6H), 6.94 (d, *J* = 8.5 Hz, 1H), 6.88 (d, *J* = 7.8 Hz, 1H), 6.78 (d, *J* = 8.5 Hz, 1H), 6.73 (t, *J* = 7.5 Hz, 1H), 4.50 (dd, *J* = 9.2, 4.8 Hz, 1H), 4.04 (dd, *J* = 18.4, 9.4 Hz, 1H), 3.74 (dq, *J* = 14.4, 7.2 Hz, 1H), 3.55 (dq, *J* = 14.3, 7.1 Hz, 1H), 3.42 (dd, *J* = 18.4, 4.8 Hz, 1H), 2.33 (s, 3H), 2.18 (s, 3H), 1.20 (t, *J* = 7.2 Hz, 3H).

**<sup>13</sup>C NMR** (101 MHz, Chloroform-*d*) δ 198.1, 172.5, 167.9, 156.6, 150.4, 145.2, 142.6, 138.5, 138.4, 136.5, 135.1, 133.5, 132.8, 132.0, 130.6, 130.5, 130.5, 128.8, 128.2, 127.2, 126.1, 123.7, 123.5, 122.5, 118.4, 116.3, 114.0, 110.6, 109.8, 108.8, 88.4, 46.4, 41.2, 34.9, 20.7, 14.2, 12.5.

**HRMS** (ESI) *m/z*: [M + Na]<sup>+</sup> Calculated for [C<sub>40</sub>H<sub>34</sub>N<sub>2</sub>O<sub>5</sub>Na<sup>+</sup>]: 645.2360 found 645.2369.

**IR** (neat) 3333, 2927, 1723, 1688, 1609, 1578, 1475, 1369, 1196, 1140, 1043, 746, 692 cm<sup>-1</sup>.

**major product**

[α]<sub>D</sub><sup>21</sup> = -55.9 (c = 0.94, in CH<sub>2</sub>Cl<sub>2</sub>).

**<sup>1</sup>H NMR** (400 MHz, Chloroform-*d*) δ 9.18 (s, 1H), 8.19 (dd, *J* = 8.1, 1.4 Hz, 1H), 7.62 (d, *J* = 7.4 Hz, 2H), 7.46 (t, *J* = 7.3 Hz, 1H), 7.32 (t, *J* = 7.7 Hz, 3H), 7.18 – 7.09 (m, 5H), 7.08 – 7.03 (m, 2H), 6.92 (d, *J* = 8.5 Hz, 1H), 6.79 (t, *J* = 8.6 Hz, 2H), 6.74 (t, *J* = 7.2 Hz, 2H), 4.69 (dd, *J* = 9.7, 5.2 Hz, 1H), 3.93 (dq, *J* = 14.4, 7.2 Hz, 1H), 3.75 (dq, *J* = 14.3, 7.2 Hz, 1H), 3.59 – 3.40 (m, 2H), 2.33 (s, 3H), 2.18 (s, 3H), 1.38 (t, *J* = 7.2 Hz, 3H).

**<sup>13</sup>C NMR** (101 MHz, Chloroform-*d*) δ 196.7, 174.8, 167.9, 156.5, 150.4, 145.2, 143.7, 138.6, 138.4, 136.2, 135.1, 133.3, 132.8, 132.1, 130.8, 130.1, 128.6, 127.7, 127.2, 126.1, 125.6, 125.1, 123.5, 122.4, 122.2, 118.0, 116.4, 110.4, 109.9, 109.0, 89.8, 44.5, 40.3, 35.2, 20.8, 14.2, 12.4.

**HRMS** (ESI) *m/z*: [M + Na]<sup>+</sup> Calculated for [C<sub>40</sub>H<sub>34</sub>N<sub>2</sub>O<sub>5</sub>Na<sup>+</sup>]: 645.2360 found 645.2360.

**IR** (neat) 3333, 3061, 2933, 1728, 1688, 1608, 1578, 1477, 1368, 1198, 1141, 1043, 747, 694 cm<sup>-1</sup>.

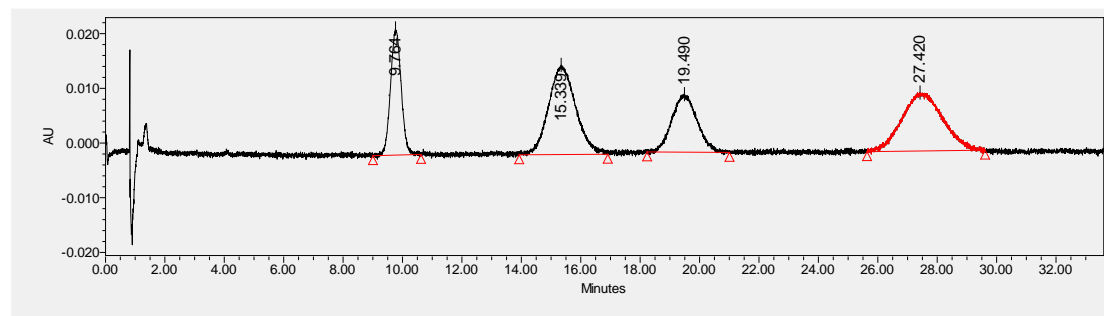

|   | Retention Time | Area   | % Area |
|---|----------------|--------|--------|
| 1 | 9.764          | 577991 | 17.81  |



|   |        |         |       |
|---|--------|---------|-------|
| 2 | 15.339 | 1031704 | 31.80 |
| 3 | 19.490 | 621559  | 19.16 |
| 4 | 27.420 | 1013310 | 31.23 |

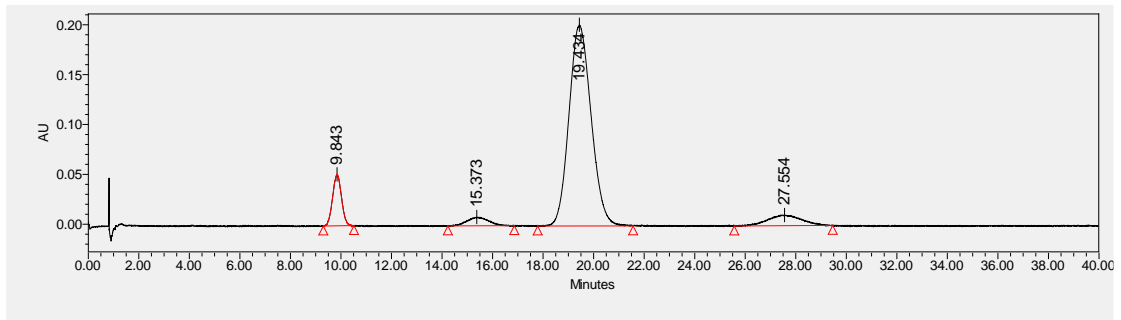

|   | Retention Time | Area     | % Area |
|---|----------------|----------|--------|
| 1 | 9.843          | 1253345  | 8.34   |
| 2 | 15.373         | 514301   | 3.42   |
| 3 | 19.434         | 12264987 | 81.62  |
| 4 | 27.554         | 994967   | 6.62   |

**(2*R*,3*S*)-1'-ethyl-2'-oxo-3-(2-oxo-2-phenylethyl)-3*H*-spiro[benzofuran-2,3'-indolin]-5-yl (S)-2-(6-methoxynaphthalen-2-yl)propanoate (C49):**

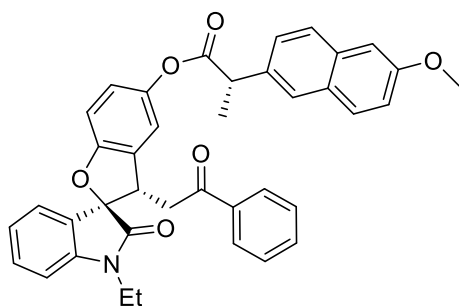

White solid, 85% yield, >19:1 dr, m.p. 148-151 °C,  $[\alpha]_D^{20} = 6.1$  ( $c = 0.58$ , in  $\text{CH}_2\text{Cl}_2$ ). Reacted for 84 h.

**$^1\text{H NMR}$**  (400 MHz, Chloroform-*d*)  $\delta$  7.81 – 7.72 (m, 3H), 7.61 – 7.55 (m, 2H), 7.51 (dd,  $J = 8.5, 1.8$  Hz, 1H), 7.45 (t,  $J = 7.4$  Hz, 1H), 7.30 (t,  $J = 7.7$  Hz, 2H), 7.19 – 7.08 (m, 3H), 7.04 (d,  $J = 7.4$  Hz, 1H), 6.90 – 6.67 (m, 5H), 4.60 (dd,  $J = 10.2, 4.7$  Hz, 1H), 4.10 (q,  $J = 7.1$  Hz, 1H), 3.95 – 3.88 (m, 4H), 3.77 – 3.67 (m, 1H), 3.49 –

3.28 (m, 2H), 1.70 (d,  $J = 7.1$  Hz, 3H), 1.36 (t,  $J = 7.2$  Hz, 3H).

**$^{13}\text{C NMR}$**  (101 MHz, Chloroform-*d*)  $\delta$  196.7, 174.7, 173.8, 157.9, 156.3, 145.3, 143.6, 136.1, 135.3, 134.0, 133.2, 130.7, 129.8, 129.5, 129.1, 128.5, 127.7, 127.5, 126.3, 126.3, 125.5, 124.9, 122.1, 121.7, 119.3, 117.4, 110.2, 109.0, 105.7, 89.7, 55.5, 45.7, 44.4, 40.2, 35.1, 18.7, 12.4.

**HRMS** (ESI)  $m/z$ :  $[\text{M} + \text{Na}]^+$  Calculated for  $[\text{C}_{39}\text{H}_{33}\text{NO}_6\text{Na}]^+$ : 634.2200 found 634.2194.

**IR** (neat) 3058, 2978, 2935, 1727, 1683, 1607, 1477, 1369, 1207, 1143, 996, 898, 751, 693  $\text{cm}^{-1}$ .

**4-benzoyl-1'-ethyl-3-(2-hydroxyphenyl)-3,4-dihydro-5*H*-spiro[furan-2,3'-indoline]-2',5-dione (Int2)**

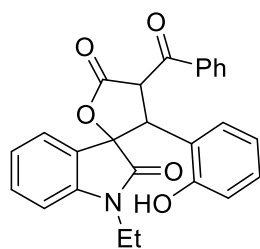

White solid.

**SFC** Daicel Chiralcel OJH,  $\text{CO}_2/\text{MeOH} = 80/20$ , 1.0 mL/min,  $\lambda = 240$  nm,  $t_1 = 6.48$  min,  $t_2 = 8.04$  min.

**$^1\text{H NMR}$**  (400 MHz, Acetone-*d*<sub>6</sub>)  $\delta$  8.25 (s, 1H), 8.04 – 7.98 (m, 2H), 7.65 – 7.61 (m, 1H), 7.60 – 7.54 (m, 1H), 7.46 (t,  $J = 7.7$  Hz, 2H), 7.29 – 7.23 (m, 2H), 7.08 – 7.01 (m, 1H), 6.84 (td,  $J = 8.1, 1.6$  Hz, 1H), 6.78 (d,  $J = 7.9$  Hz, 1H), 6.61 – 6.54 (m, 1H), 6.48 (dd,  $J = 8.1, 0.9$  Hz, 1H), 5.97 (d,

$J = 12.8$  Hz, 1H), 5.37 (d,  $J = 12.8$  Hz, 1H), 3.54 (dq,  $J = 14.5, 7.3$  Hz, 1H), 3.29 (dq,  $J = 14.2, 7.1$  Hz, 1H), 0.68 (t,  $J = 7.2$  Hz, 3H).

**$^{13}\text{C NMR}$**  (101 MHz, Acetone-*d*<sub>6</sub>)  $\delta$  193.9, 173.6, 172.2, 156.8, 144.4, 137.3, 135.0, 132.0, 130.2, 129.9, 129.8, 129.2, 126.7, 125.3, 123.8, 120.2, 118.7, 116.2, 109.6, 86.1, 52.0, 46.3, 35.0, 12.4.

**HRMS** (ESI)  $m/z$ :  $[\text{M} + \text{Na}]^+$  Calculated for  $[\text{C}_{26}\text{H}_{21}\text{NO}_5\text{Na}]^+$ : 450.1312 found 450.1317.

**IR** (neat) 3369, 2976, 1785, 1709, 1613, 1461, 1377, 1267, 1164, 1024, 753, 681  $\text{cm}^{-1}$ .

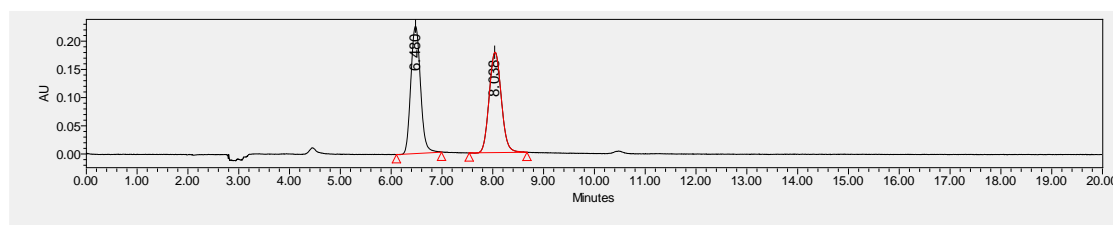

|   | Retention Time | Area    | % Area |
|---|----------------|---------|--------|
| 1 | 6.480          | 2991023 | 50.40  |
| 2 | 8.038          | 2943872 | 49.60  |

**(2*R*,3*S*)-1'-ethyl-3-((*R*)-2-hydroxy-2-phenylethyl)-3*H*-spiro[benzofuran-2,3'-indolin]-2'-one**

**(D1):**

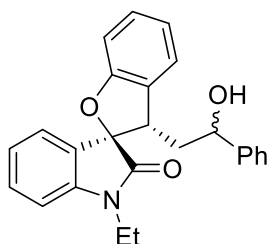

White solid, 90% yield, 99:1 er, 83:17 dr, m.p. 66-70 °C,  $[\alpha]_D^{20} = 7.0$  ( $c = 0.60$ , in  $\text{CH}_2\text{Cl}_2$ ).

**SFC** Daicel Chiralcel OJH,  $\text{CO}_2/\text{EtOH} = 90/10$ , 1.0 mL/min,  $\lambda = 240$  nm,  $t_1 = 22.13$  min,  $t_2 = 25.16$  min,  $t_3 = 29.59$  min.

**$^1\text{H}$  NMR** (400 MHz, Chloroform-*d*)  $\delta$  7.43 – 7.27 (m, 2H), 7.26 – 6.81 (m, 11H), 4.58 – 4.39 (m, 1H), 4.14 – 4.02 (m, 1H), 3.91 – 3.70 (m, 2H), 2.24 – 2.16 (m, 1H), 2.06 – 1.86 (m, 2H), 1.30 (t,  $J = 7.2$  Hz, 3H).

**$^{13}\text{C}$  NMR** (101 MHz, Chloroform-*d*)  $\delta$  175.0, 158.5, 144.1, 143.3, 130.6, 130.1, 128.7, 128.7, 128.0, 125.9, 125.3, 124.2, 122.6, 121.3, 110.1, 109.0, 90.0, 73.1, 45.8, 39.7, 35.1, 12.7.

**HRMS** (ESI)  $m/z$ :  $[\text{M} + \text{Na}]^+$  Calculated for  $[\text{C}_{25}\text{H}_{23}\text{NO}_3\text{Na}]^+$ : 408.1570 found 408.1564.

**IR** (neat) 3435, 3056, 2934, 1713, 1608, 1465, 1370, 1229, 1015, 861, 745, 698  $\text{cm}^{-1}$ .

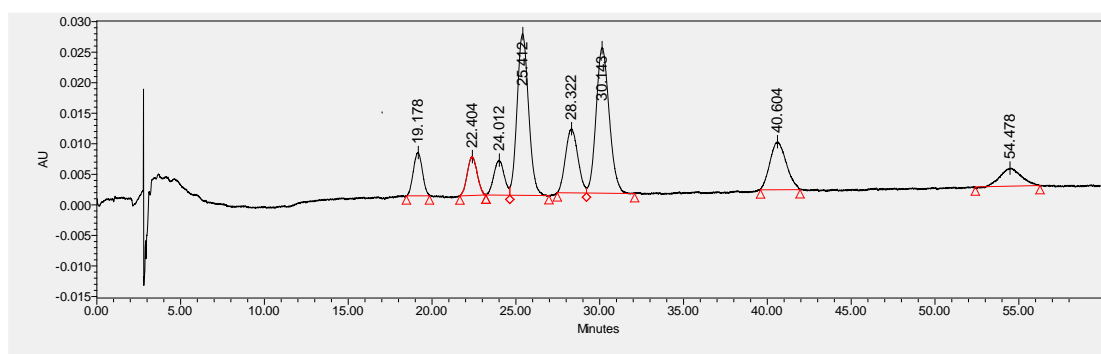

|   | Retention Time | Area    | % Area |
|---|----------------|---------|--------|
| 1 | 19.178         | 264495  | 5.69   |
| 2 | 22.404         | 260658  | 5.61   |
| 3 | 24.012         | 246708  | 5.31   |
| 4 | 25.412         | 1252172 | 26.95  |
| 5 | 28.322         | 534925  | 11.51  |
| 6 | 30.143         | 1296259 | 27.90  |
| 7 | 40.604         | 529350  | 11.39  |
| 8 | 54.478         | 261909  | 5.64   |

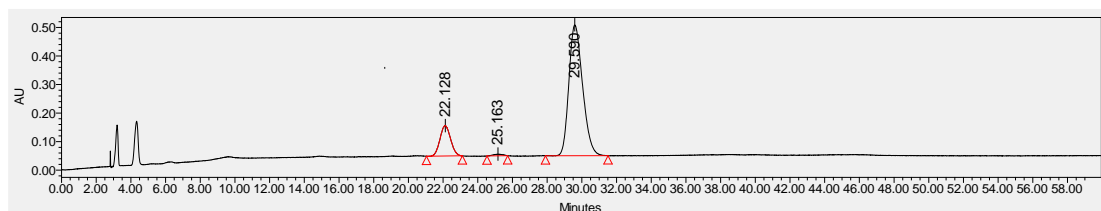

|   | Retention Time | Area     | % Area |
|---|----------------|----------|--------|
| 1 | 22.128         | 4525301  | 15.15  |
| 2 | 25.163         | 207892   | 0.70   |
| 3 | 29.590         | 25136544 | 84.15  |

**(2R,3S)-5-chloro-1'-ethyl-3-((Z)-2-(hydroxyimino)-2-phenylethyl)-3H-spiro[benzofuran-2,3'-indolin]-2'-one (D2):**

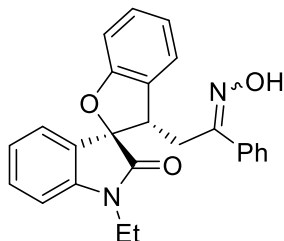

White solid, 88% yield, 99:1 er, Z/E = 4.9:1, m.p. 82-85 °C,  $[\alpha]_D^{20} = 8.9$  (c = 0.71, in CH<sub>2</sub>Cl<sub>2</sub>).

**SFC** Daicel Chiralcel OJH, CO<sub>2</sub>/MeOH = 90/10, 1.5 mL/min,  $\lambda = 240$  nm,  $t_1 = 20.83$  min,  $t_2 = 24.35$  min,  $t_3 = 36.63$  min.

**<sup>1</sup>H NMR** (400 MHz, Chloroform-*d*)  $\delta$  8.94 (s, 1H), 7.34–7.26 (m, 1H), 7.25–6.60 (m, 12H), 4.61–4.56 (t,  $J = 7.4$  Hz, 1H), 3.68 (dq,  $J = 14.4$ , 7.2, 6.8 Hz, 1H), 3.51 (dq,  $J = 14.3$ , 7.2 Hz, 1H), 3.26 (m, 1H), 2.87 –

2.66 (m, 1H), 1.34 – 1.17 (m, 3H).

**<sup>13</sup>C NMR** (101 MHz, Chloroform-*d*)  $\delta$  174.5, 158.6, 156.9, 143.0, 135.1, 130.8, 129.5, 129.2, 128.8, 128.5, 126.3, 125.2, 124.4, 122.7, 121.6, 110.1, 109.1, 89.4, 45.8, 35.1, 27.2, 12.6.

**HRMS** (ESI)  $m/z$ : [M + Na]<sup>+</sup> Calculated for [C<sub>25</sub>H<sub>22</sub>N<sub>2</sub>O<sub>3</sub>Na<sup>+</sup>]: 421.1523 found 421.1528.

**IR** (neat) 3317, 3055, 2933, 1712, 1608, 1467, 1371, 1228, 1105, 1107, 965, 937, 740, 695 cm<sup>-1</sup>.

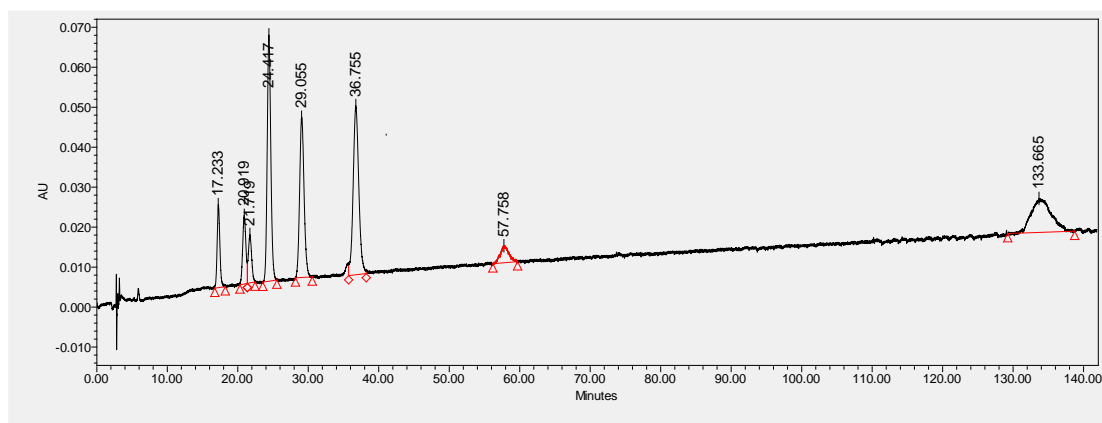

|   | Retention Time | Area    | % Area |
|---|----------------|---------|--------|
| 1 | 17.233         | 559778  | 5.72   |
| 2 | 20.919         | 547086  | 5.59   |
| 3 | 21.719         | 390734  | 3.99   |
| 4 | 24.417         | 2181019 | 22.28  |
| 5 | 29.055         | 1757932 | 17.96  |
| 6 | 36.755         | 2350539 | 24.02  |
| 7 | 57.758         | 354053  | 3.62   |
| 8 | 133.665        | 1645830 | 16.82  |

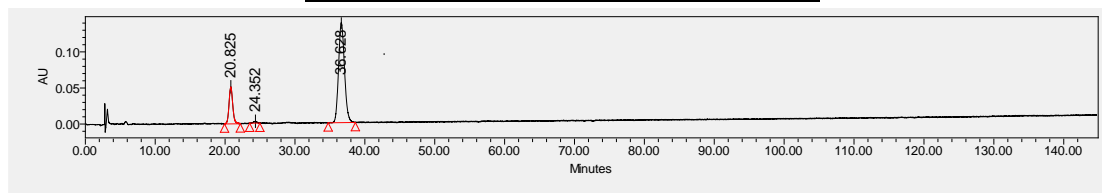

|   | Retention Time | Area    | % Area |
|---|----------------|---------|--------|
| 1 | 20.825         | 1893411 | 18.56  |
| 2 | 24.352         | 81663   | 0.80   |
| 3 | 36.628         | 8225112 | 80.64  |

**(2R,3S)-1'-ethyl-3-(2-hydroxy-2,2-diphenylethyl)-3H-spiro[benzofuran-2,3'-indolin]-2'-one**

**(D3):**

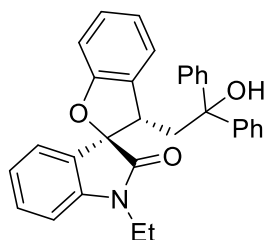

Light green solid, 71% yield, 99:1 er, >19:1 dr, m.p. 79-84 °C,  $[\alpha]_D^{21} = -79$  (c = 0.55, in CH<sub>2</sub>Cl<sub>2</sub>).

**SFC** Daicel Chiralcel OX-3, CO<sub>2</sub>/MeOH = 85/15, 1.5 mL/min,  $\lambda = 240$  nm,  $t_1 = 5.95$  min,  $t_2 = 6.47$  min,  $t_3 = 7.60$  min,  $t_4 = 21.88$  min.

**<sup>1</sup>H NMR** (400 MHz, Chloroform-*d*)  $\delta$  7.39 – 7.29 (m, 5H), 7.23 – 7.16 (m, 4H), 7.16 – 7.08 (m, 5H), 6.97 – 6.90 (m, 2H), 6.86 (d,  $J = 7.8$  Hz, 1H), 6.78 (d,  $J = 7.8$  Hz, 1H), 4.02 (d,  $J = 8.5$  Hz, 1H), 3.89 – 3.80 (m, 1H), 3.75 – 3.66 (m, 1H), 2.93 (dd,  $J = 14.8$ , 2.3 Hz, 1H), 2.72 (dd,  $J = 14.8$ , 8.7 Hz, 1H), 1.33 (t,  $J = 7.2$  Hz, 3H).

**<sup>13</sup>C NMR** (101 MHz, Chloroform-*d*)  $\delta$  174.4, 158.2, 147.4, 145.2, 143.6, 130.7, 130.6, 128.6, 128.5, 127.5, 127.2, 127.1, 126.2, 126.1, 125.1, 123.9, 122.5, 121.2, 109.9, 108.9, 90.7, 78.1, 43.8, 42.1, 35.1, 12.7.

**HRMS** (ESI)  $m/z$ :  $[M + Na]^+$  Calculated for  $[C_{31}H_{27}NO_3Na]^+$ : 484.1883 found 484.1883.

**IR** (neat) 3464, 3056, 2933, 1722, 1608, 1469, 1371, 1233, 1102, 748, 700 cm<sup>-1</sup>.

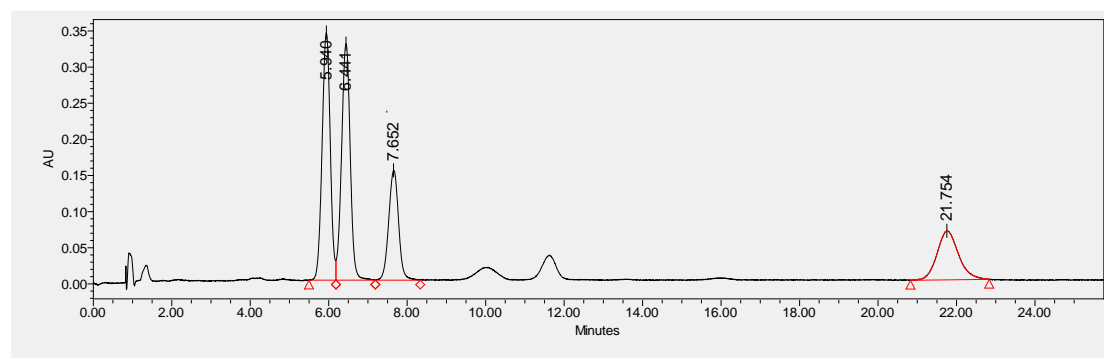

|   | Retention Time | Area    | % Area |
|---|----------------|---------|--------|
| 1 | 5.940          | 4933895 | 32.49  |
| 2 | 6.441          | 5018744 | 33.05  |
| 3 | 7.652          | 2657007 | 17.50  |
| 4 | 21.754         | 2576231 | 16.96  |

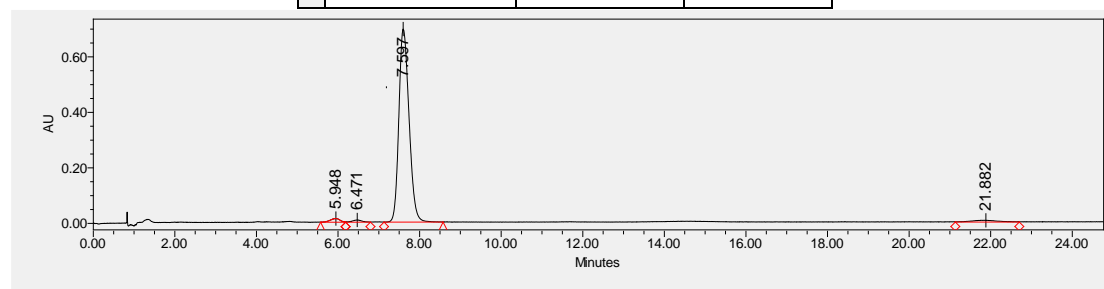

|   | Retention Time | Area     | % Area |
|---|----------------|----------|--------|
| 1 | 5.948          | 222463   | 1.75   |
| 2 | 6.471          | 130380   | 1.03   |
| 3 | 7.597          | 12039730 | 94.97  |
| 4 | 21.882         | 284328   | 2.24   |

## 9. Copies of $^1\text{H}$ , $^{13}\text{C}$ and $^{19}\text{F}$ NMR spectra of the products

### B26

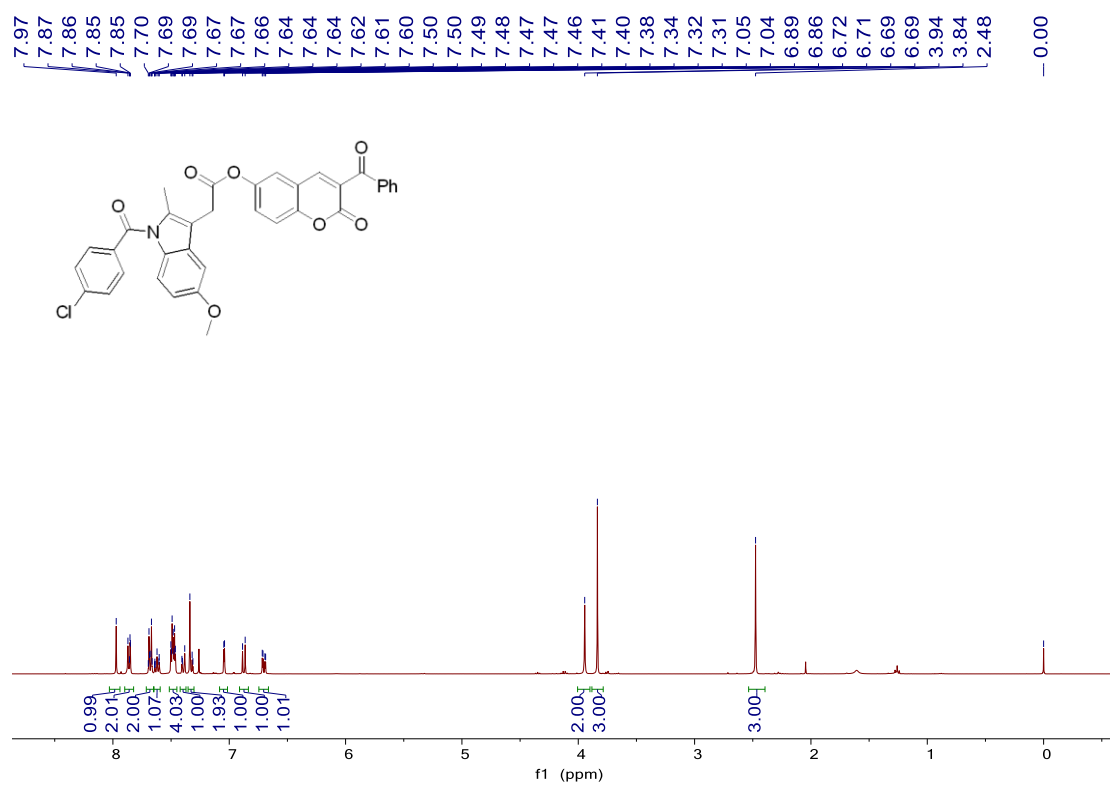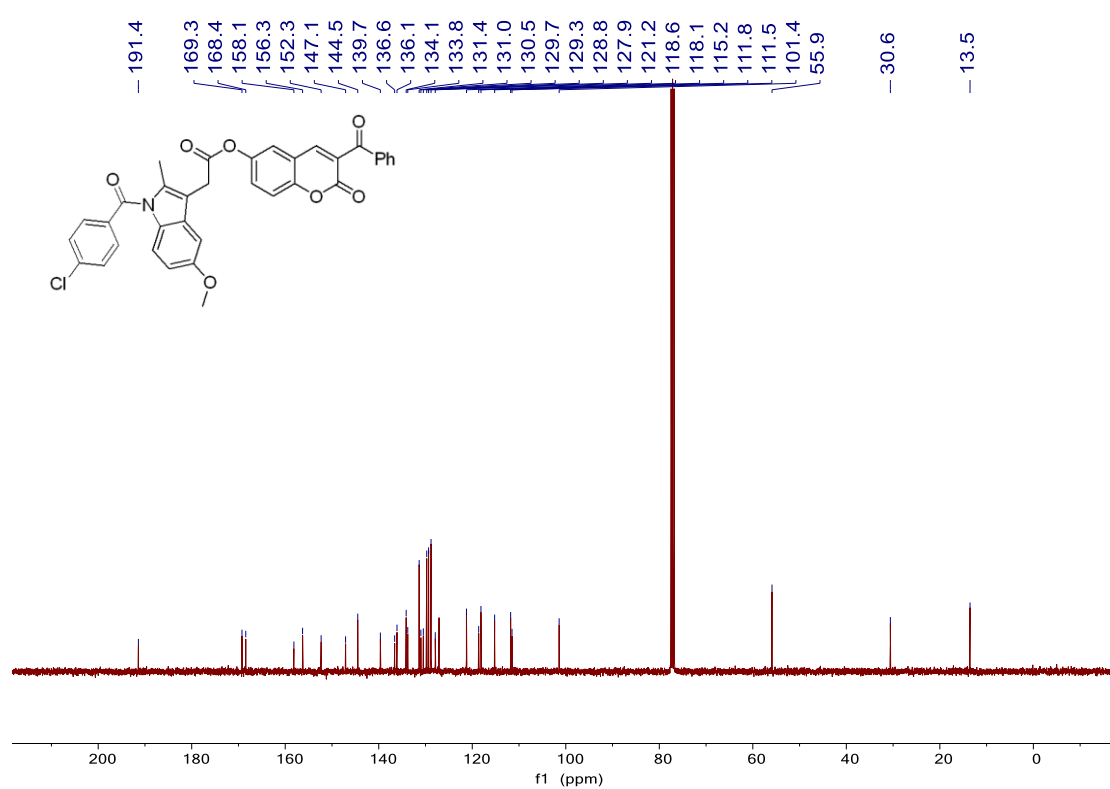

**B27**

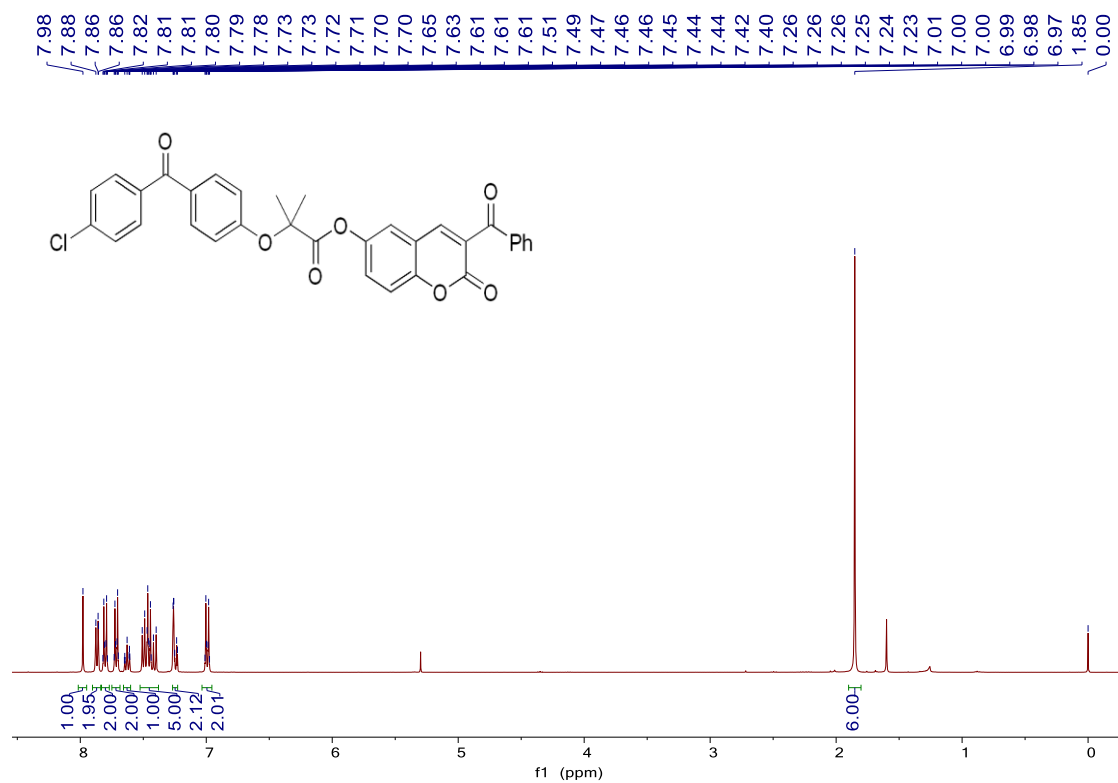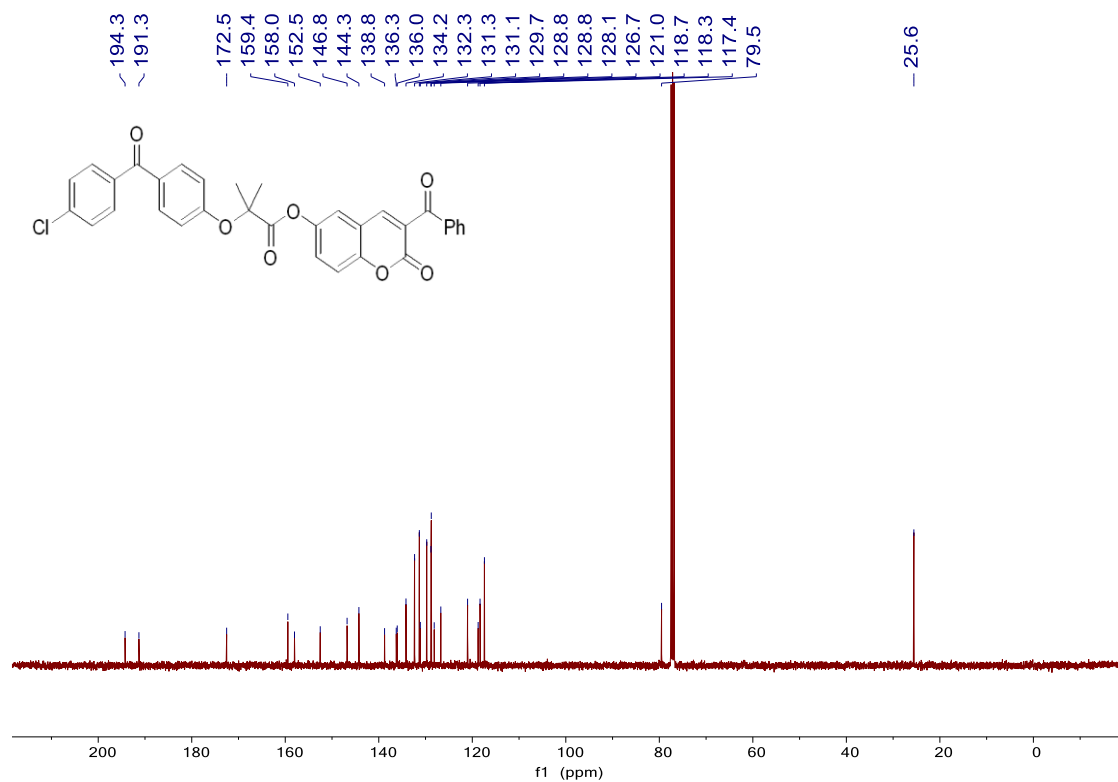

**B28**

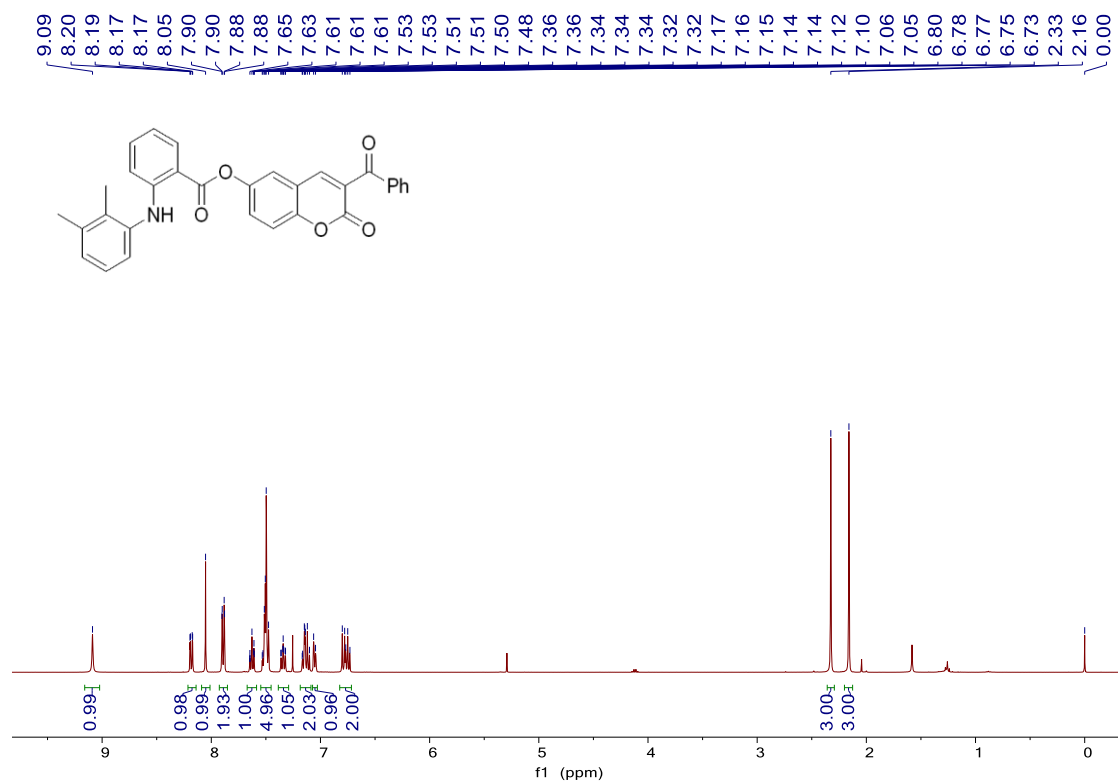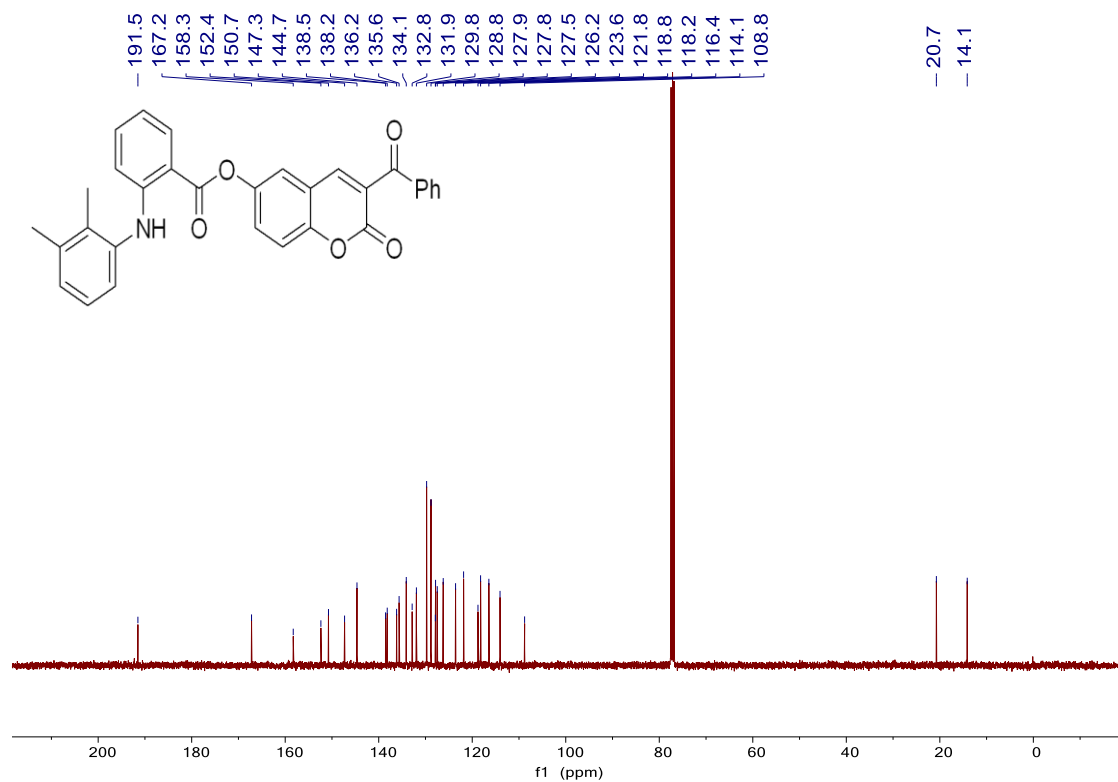



**B29**

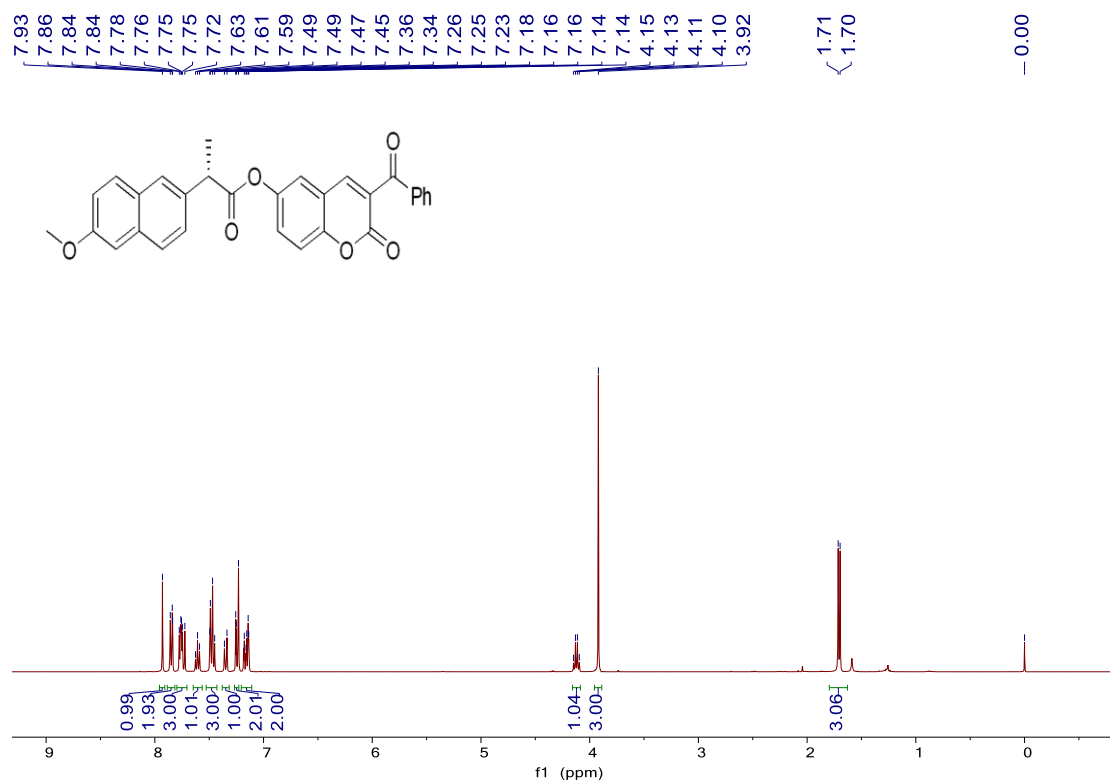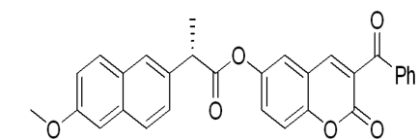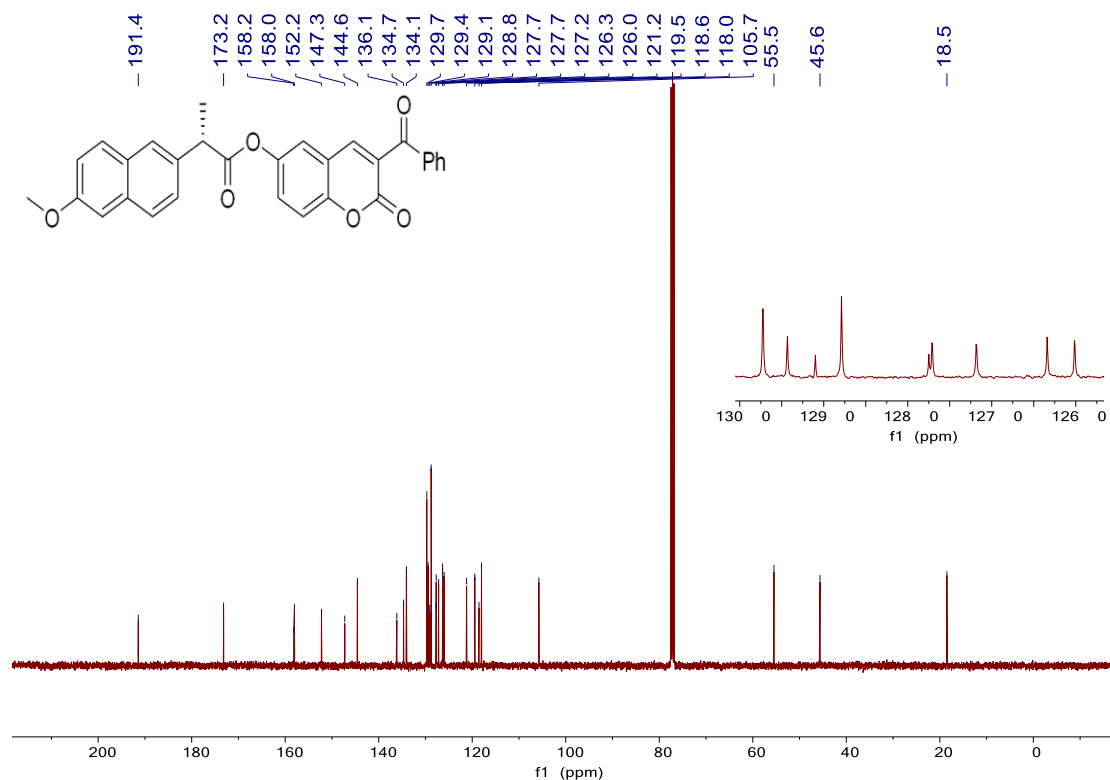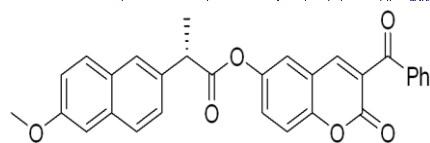

# Int2

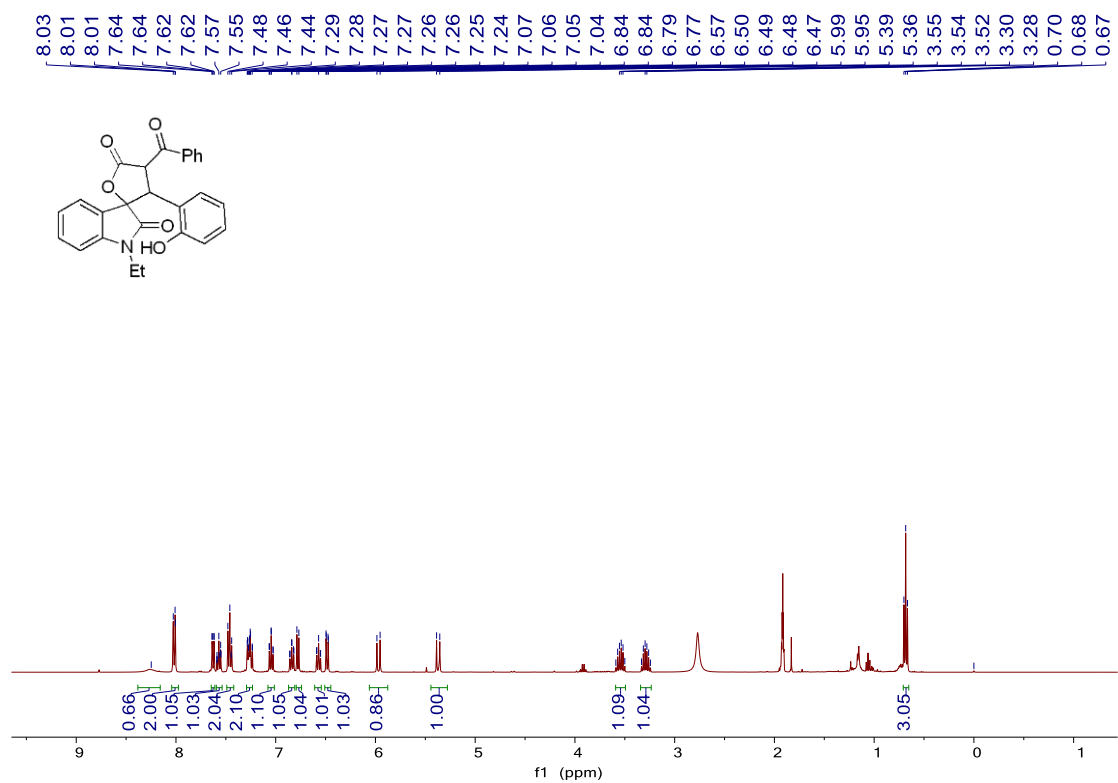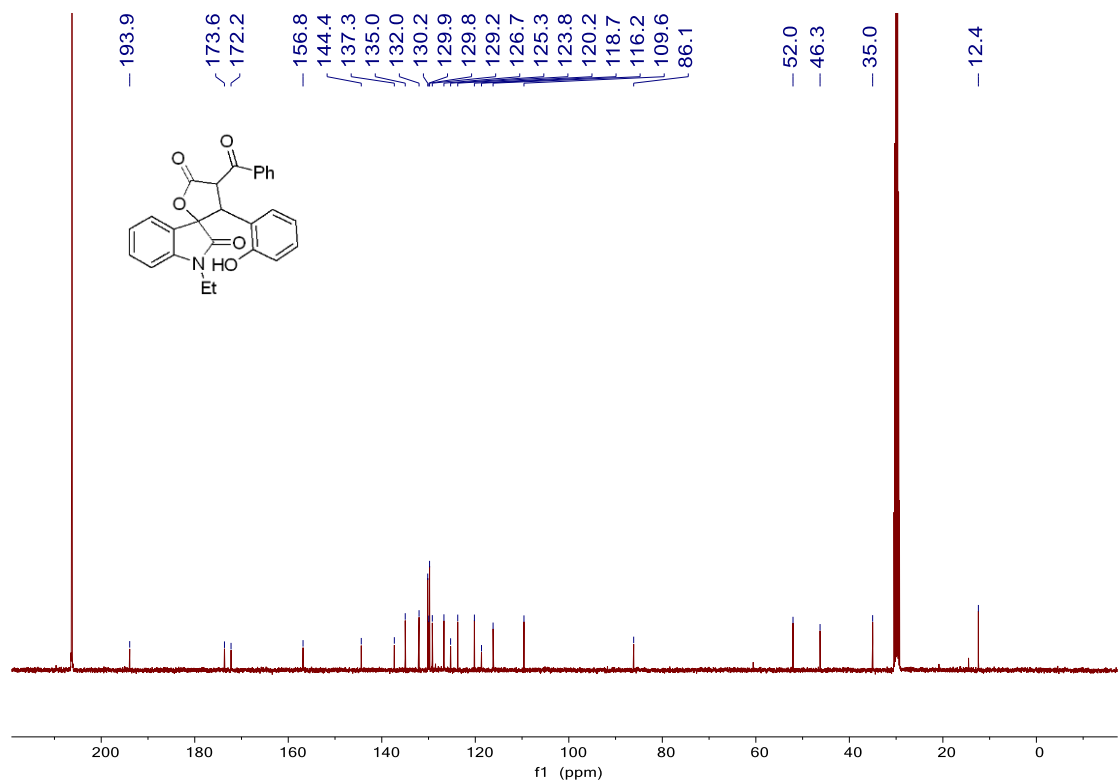

C1

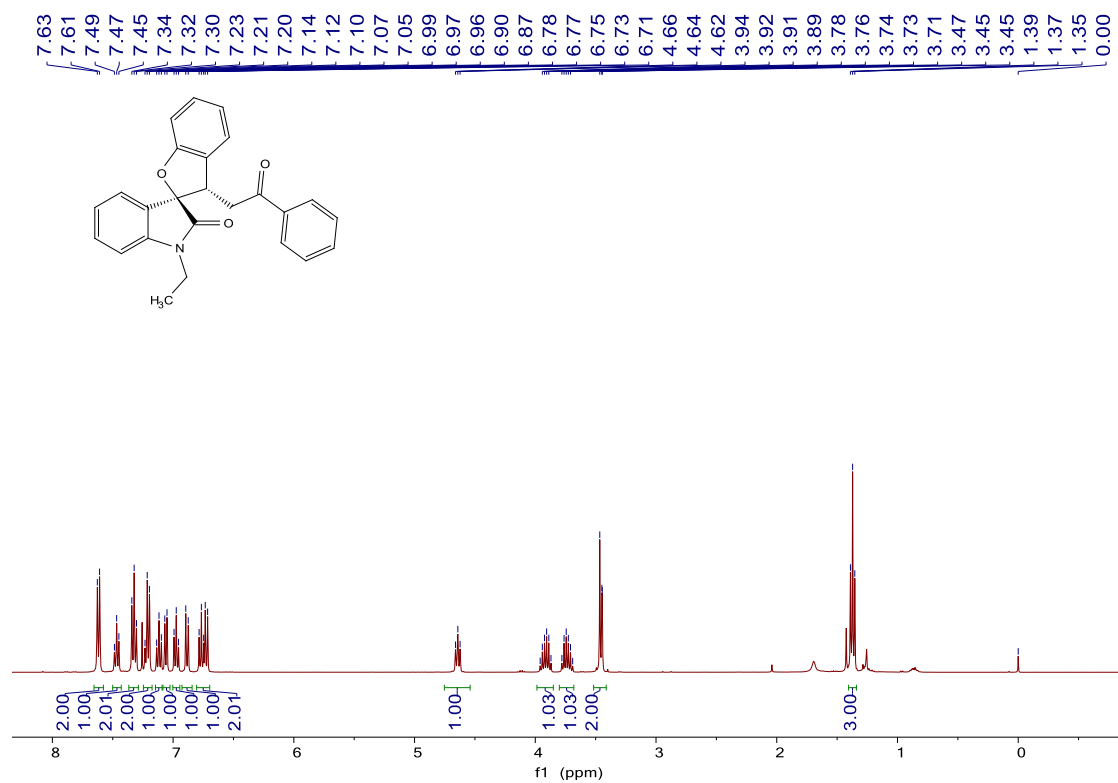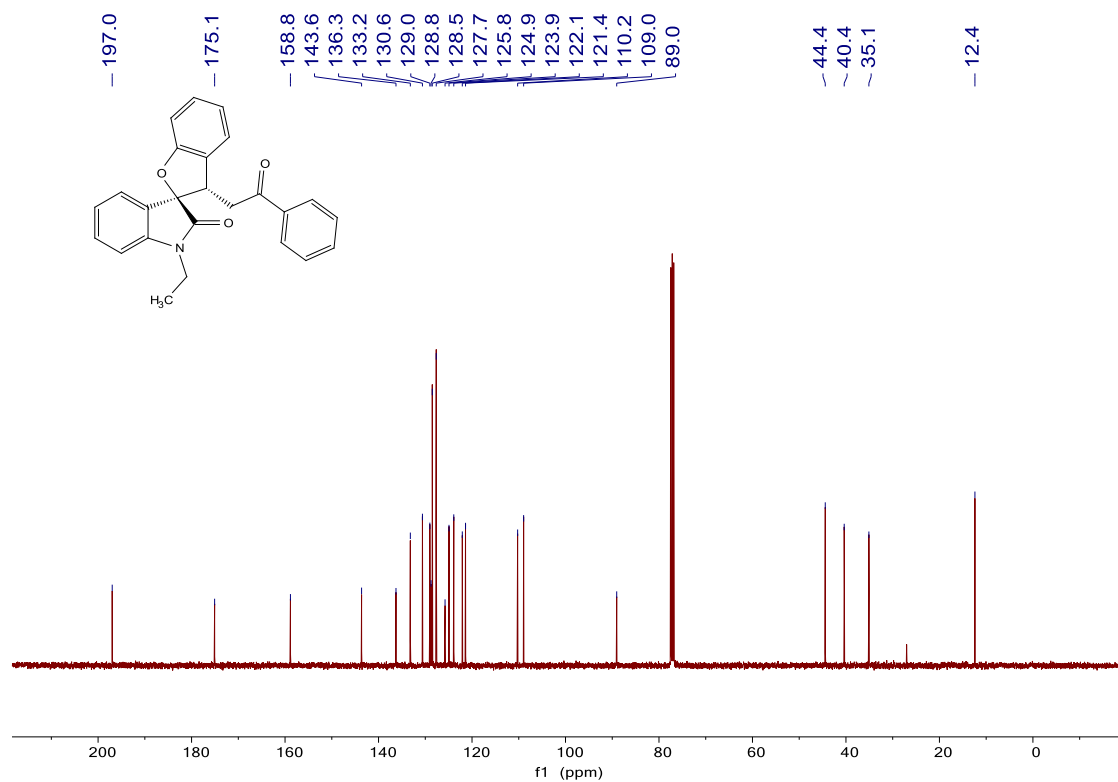

C2

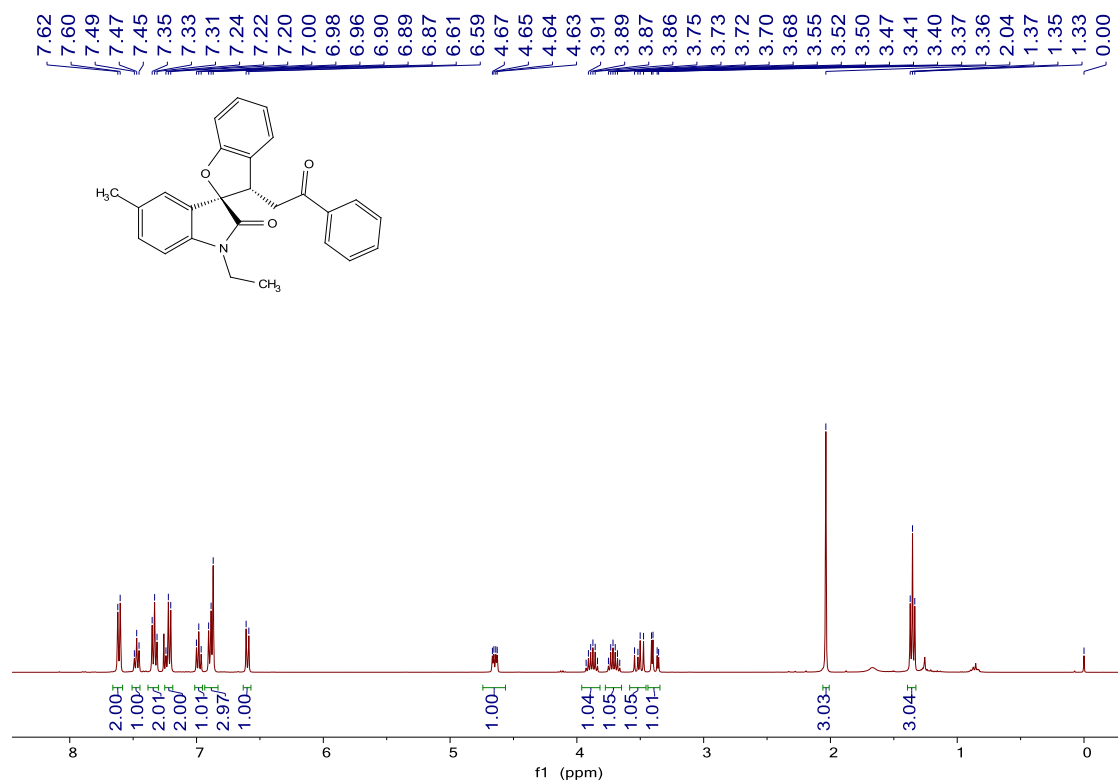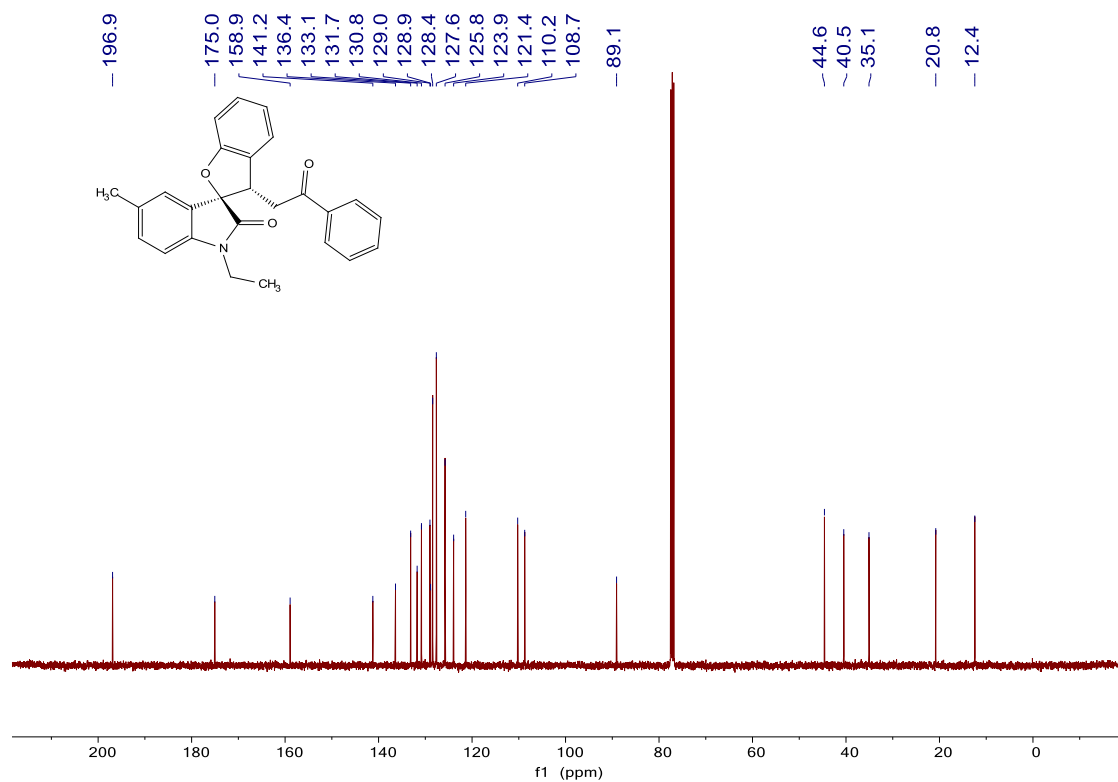

C3

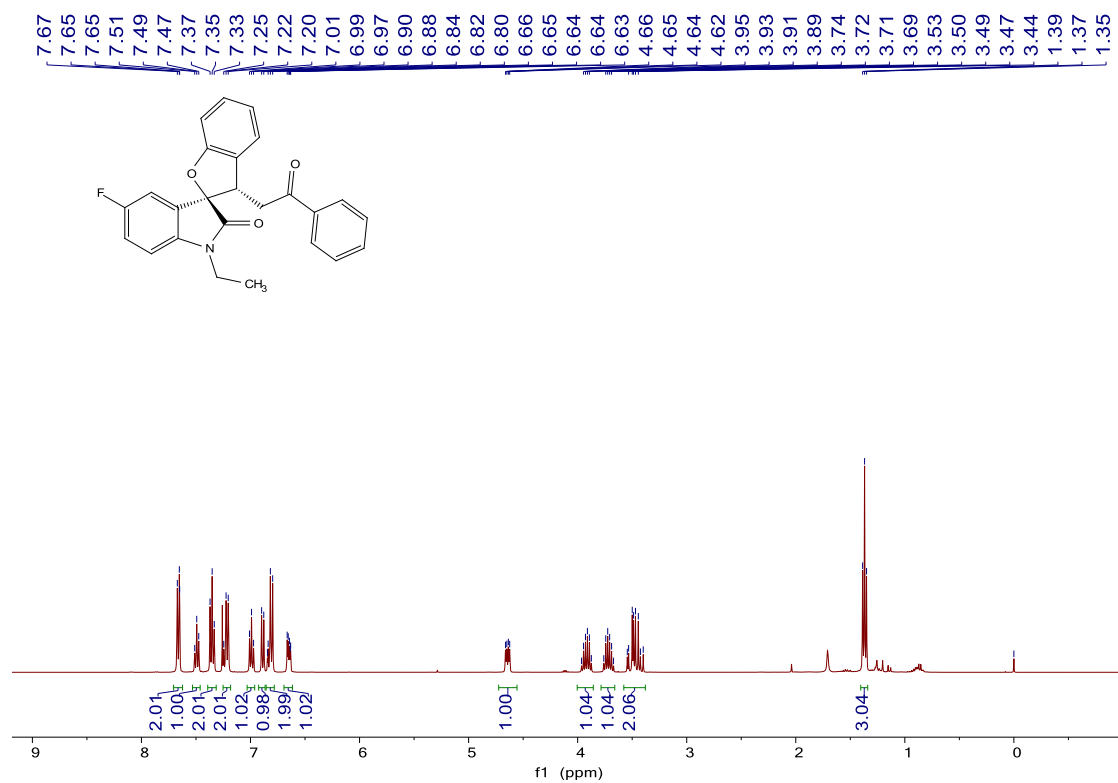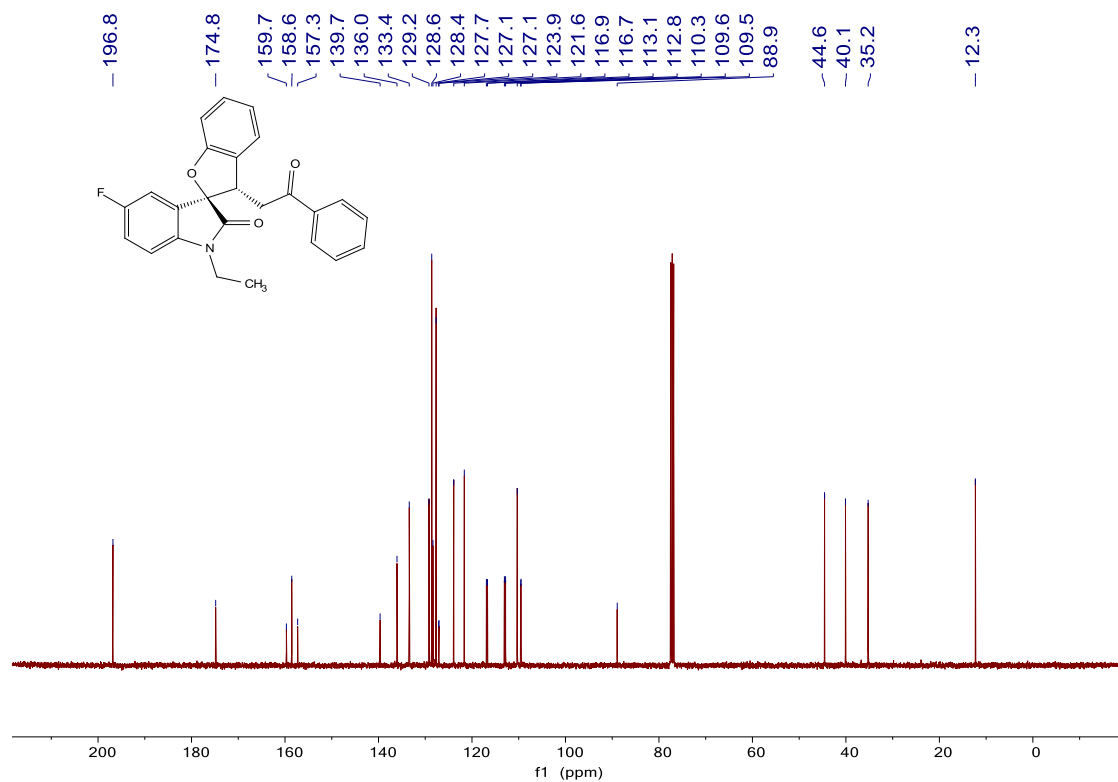

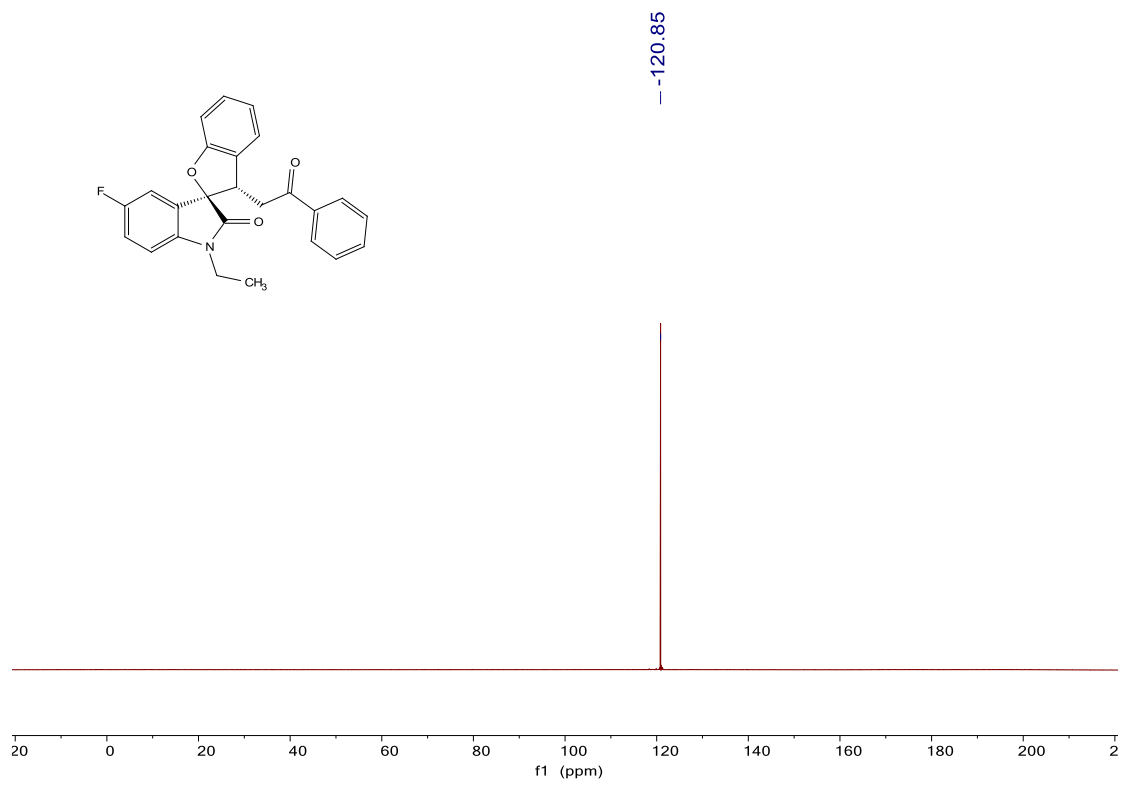

C4

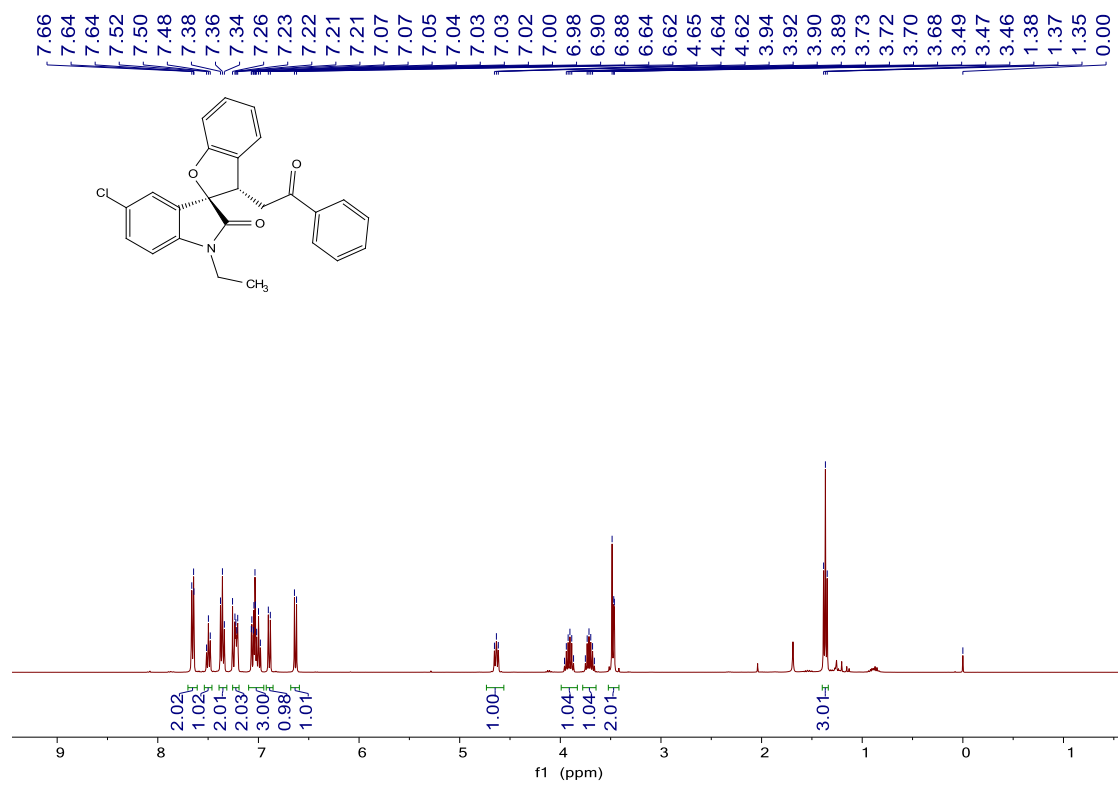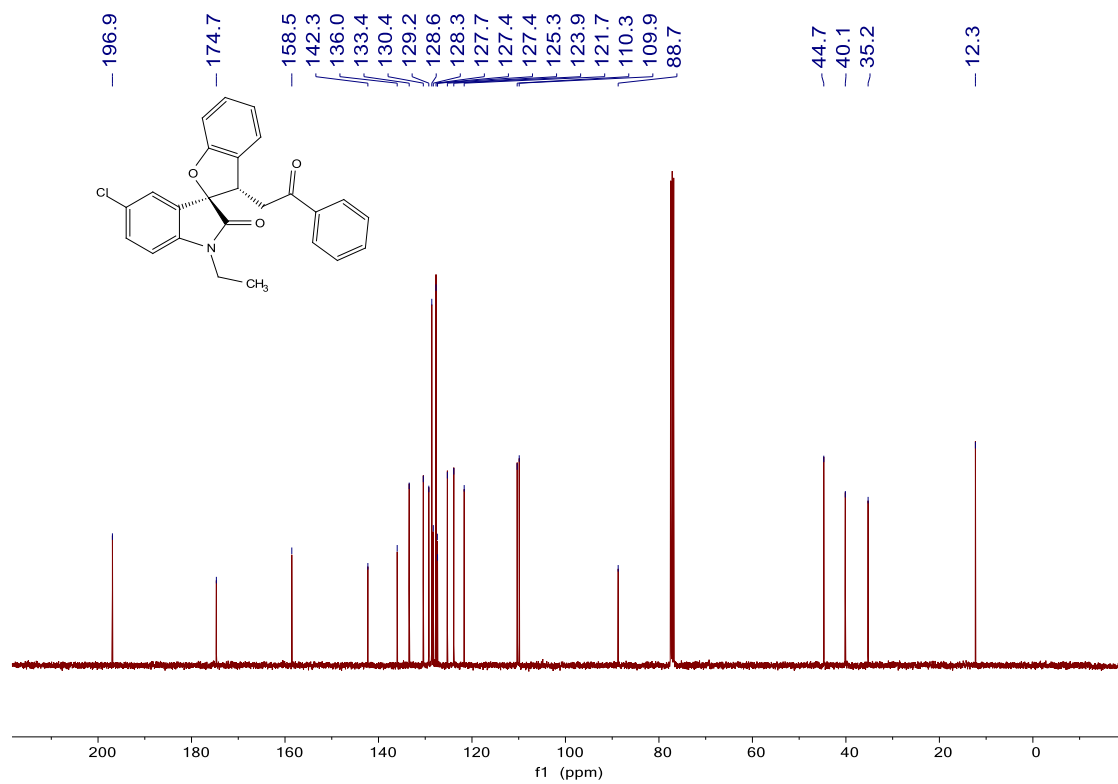

C5

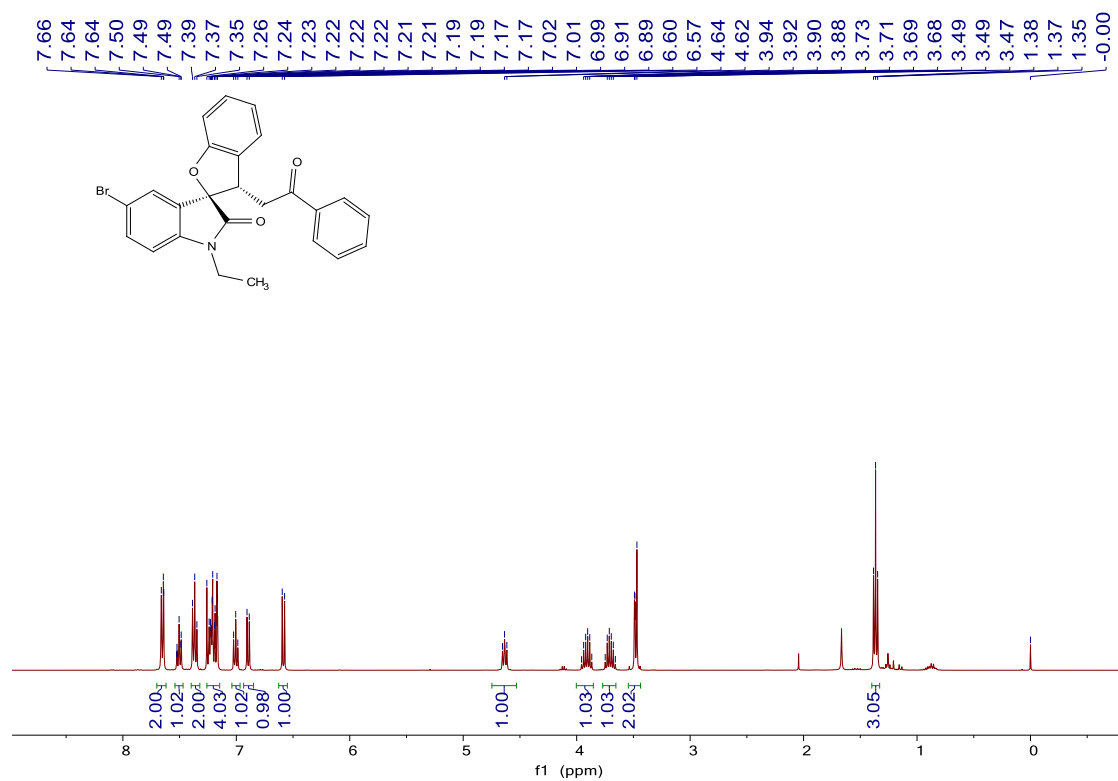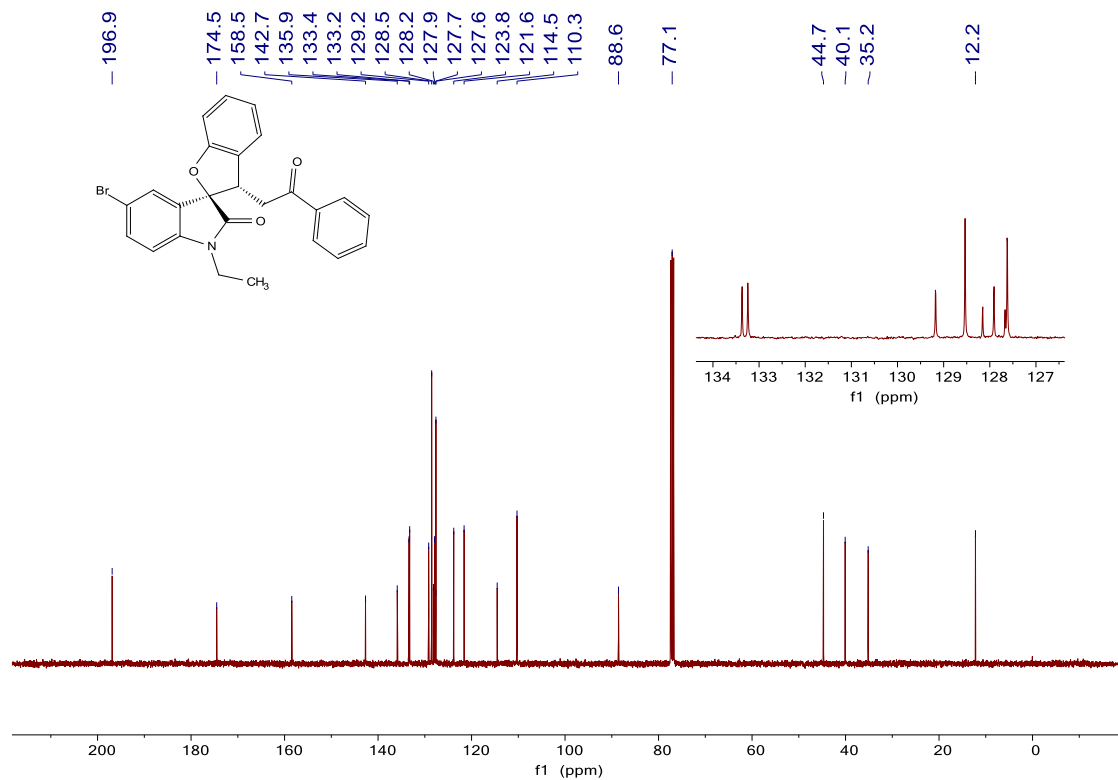



C6

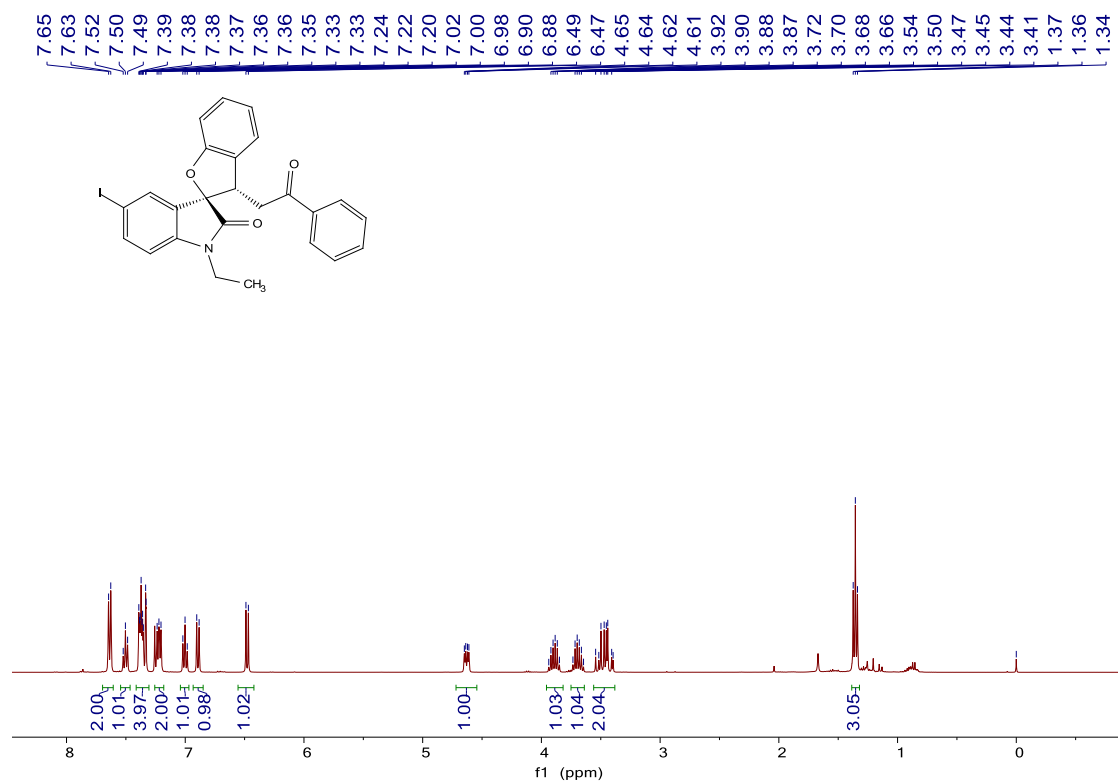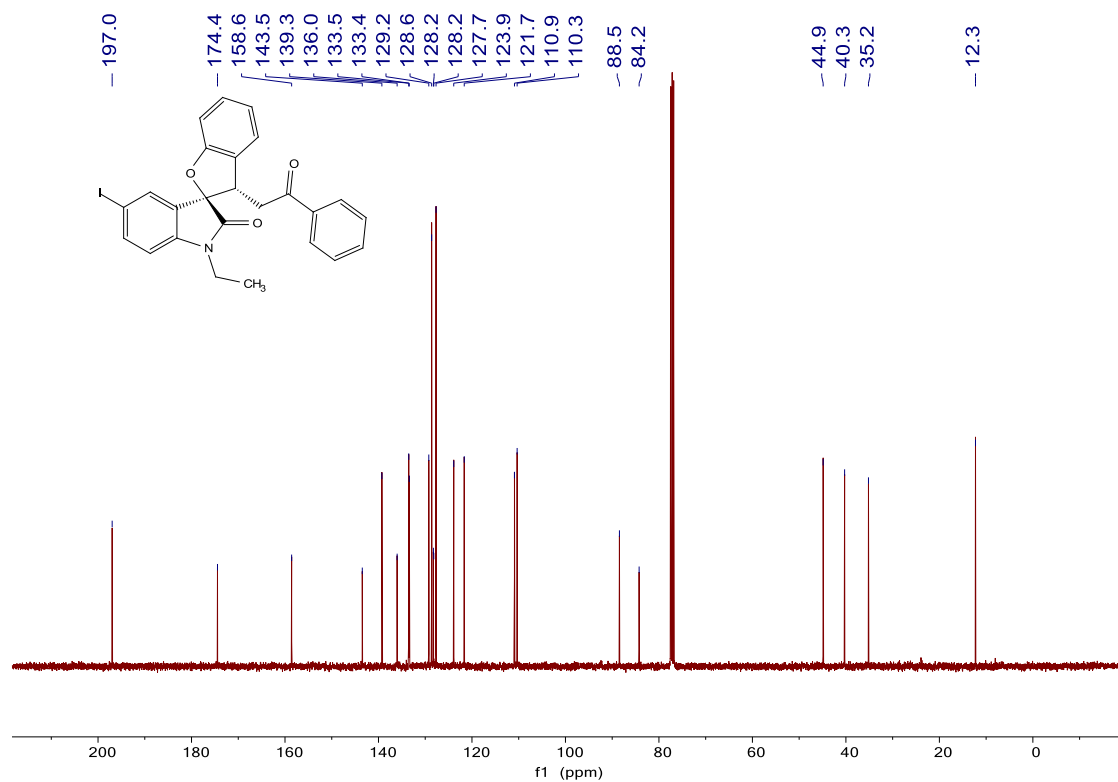

C7

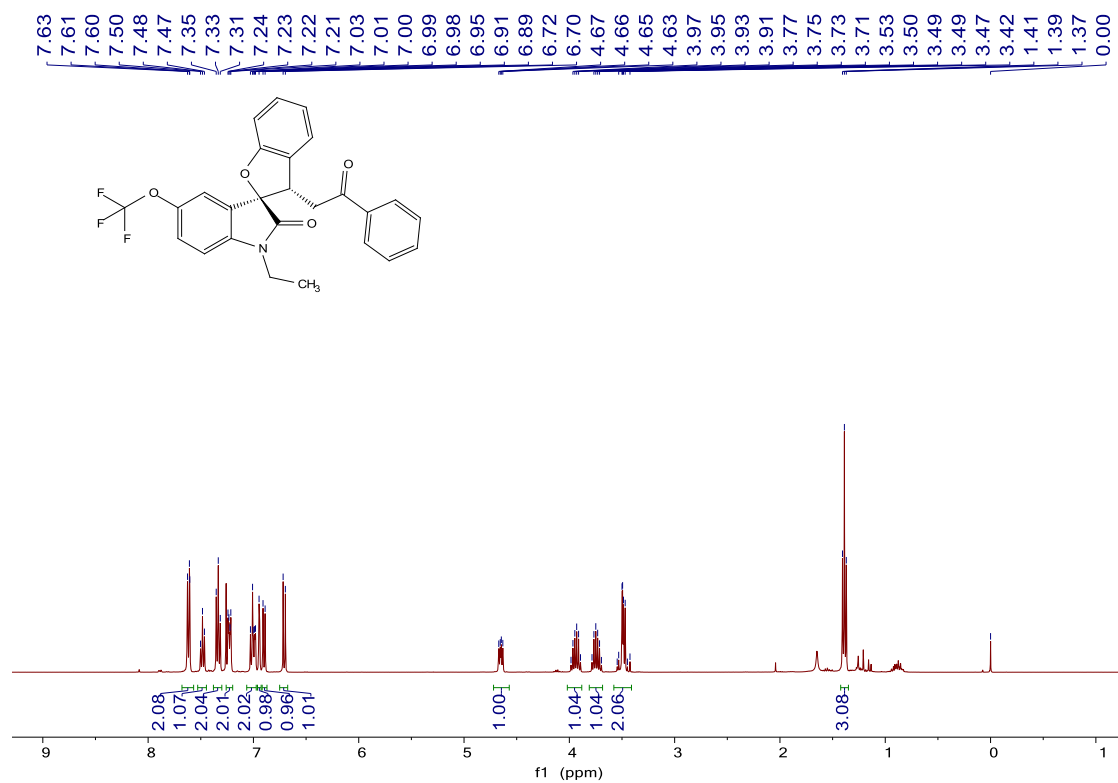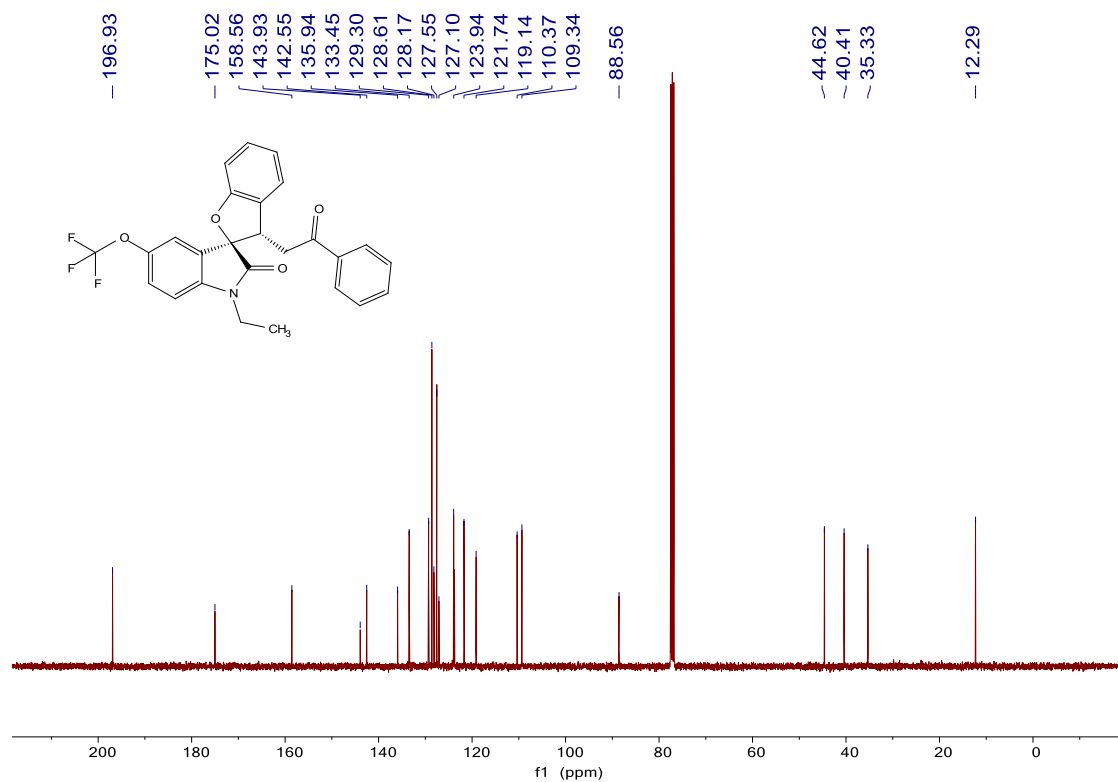

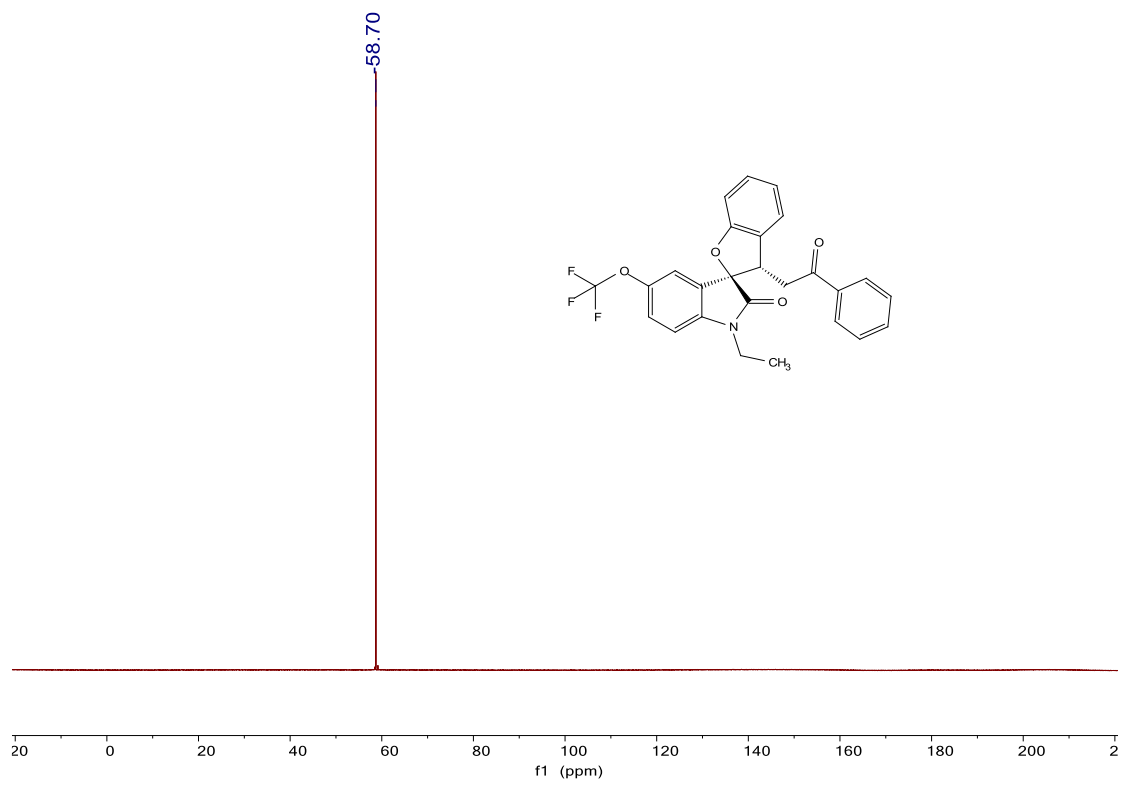

C8

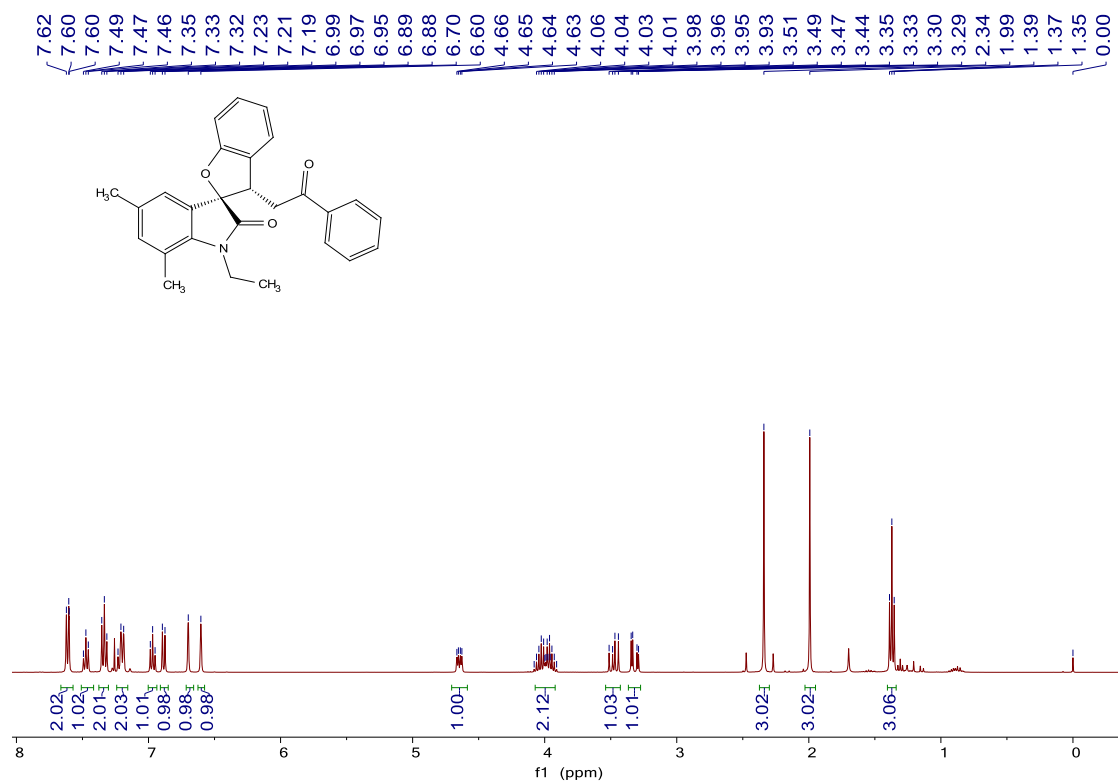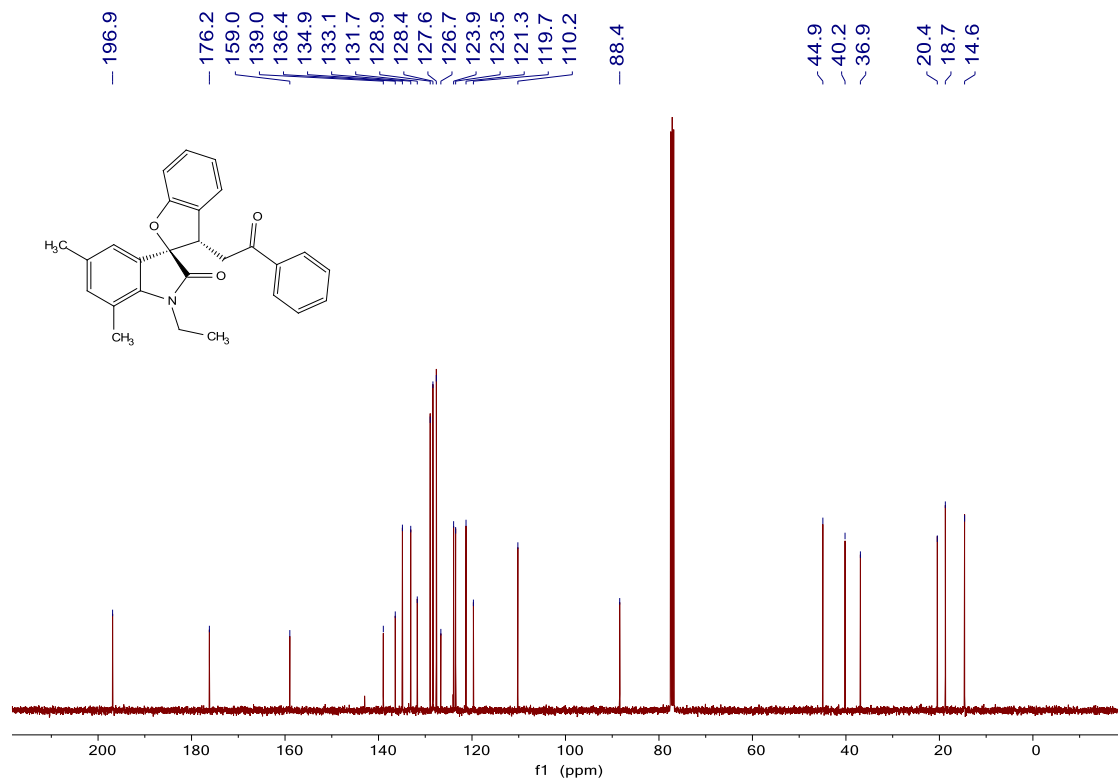

C9

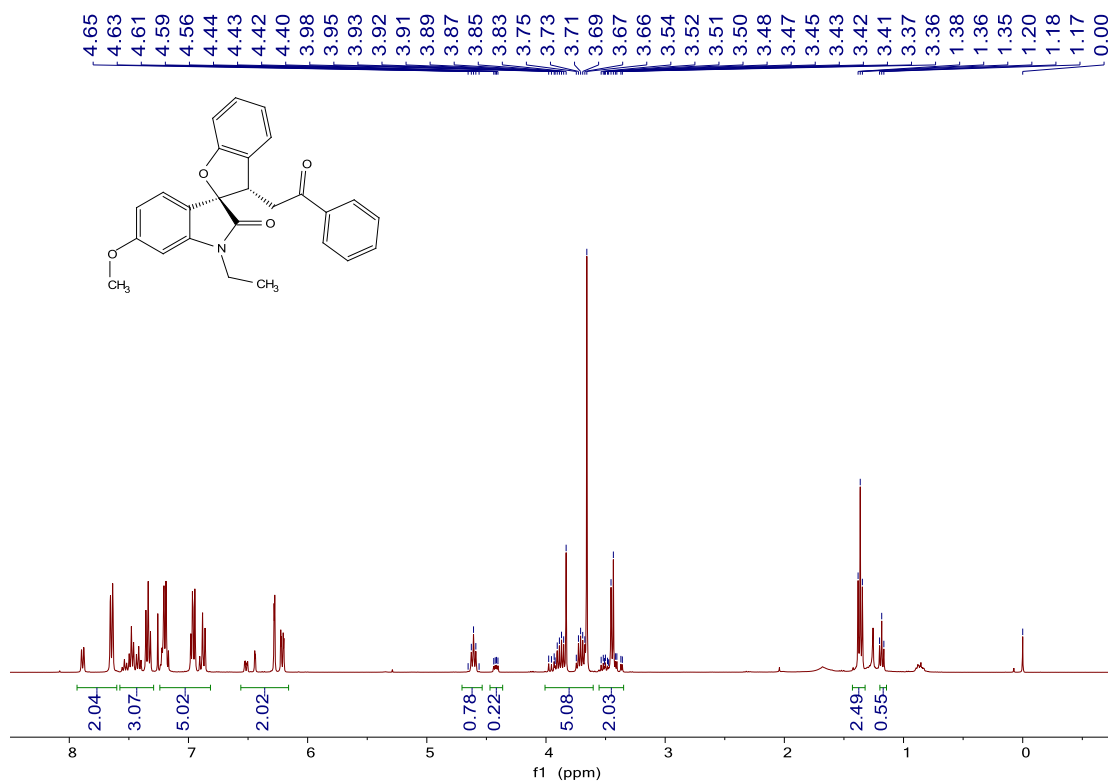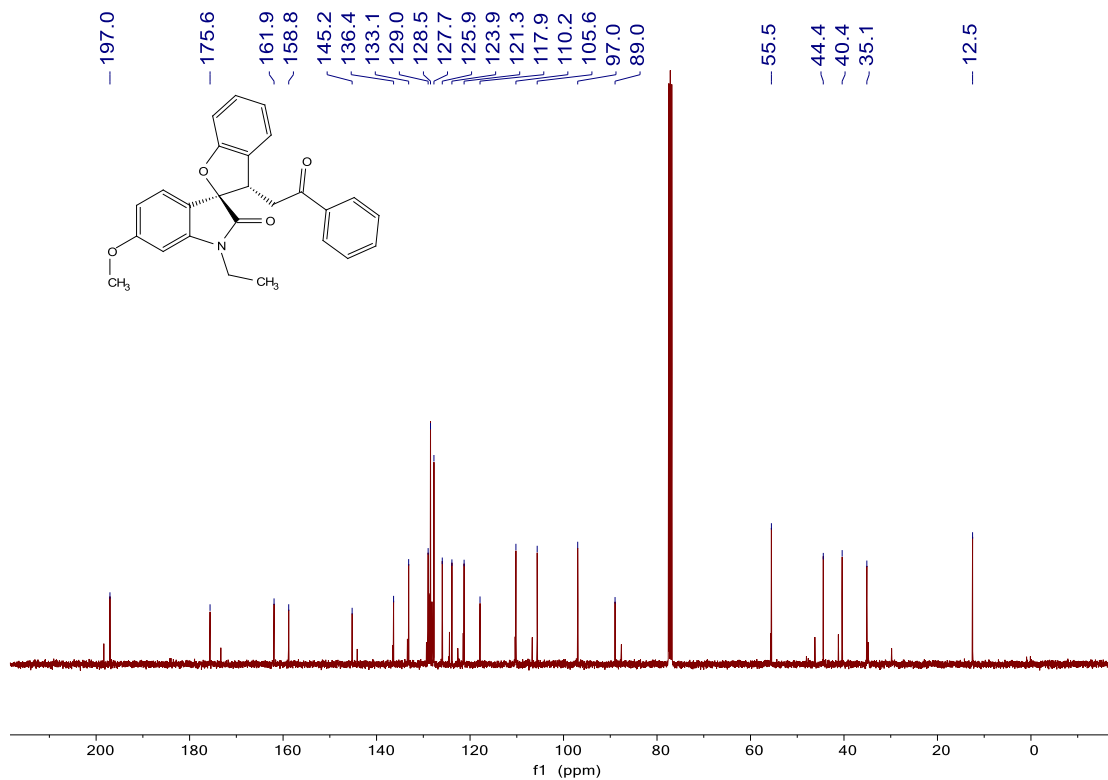

Minor diastereomer of C9

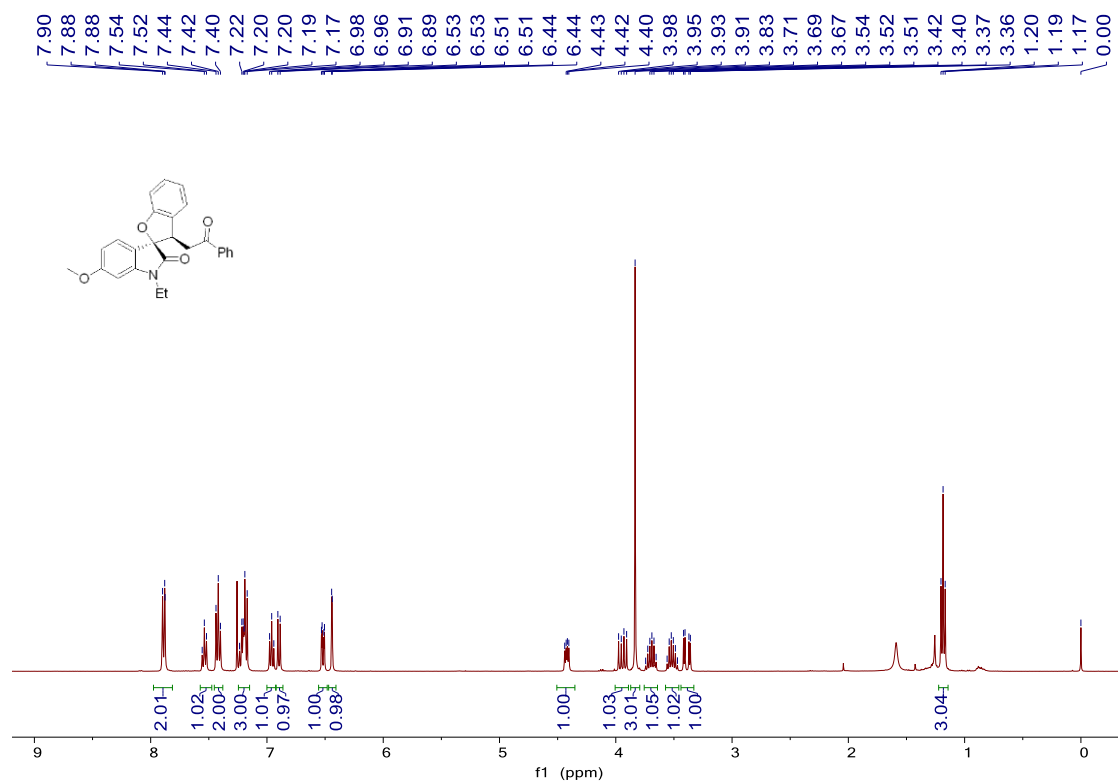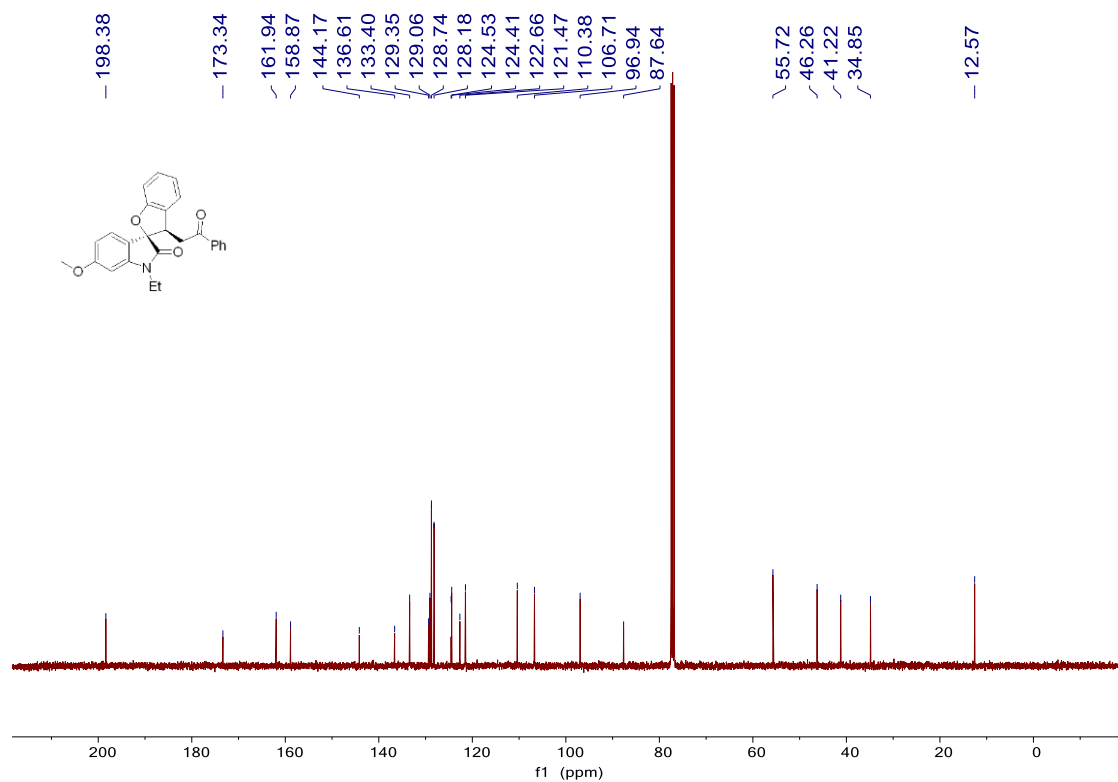

### Major diastereomer of C9

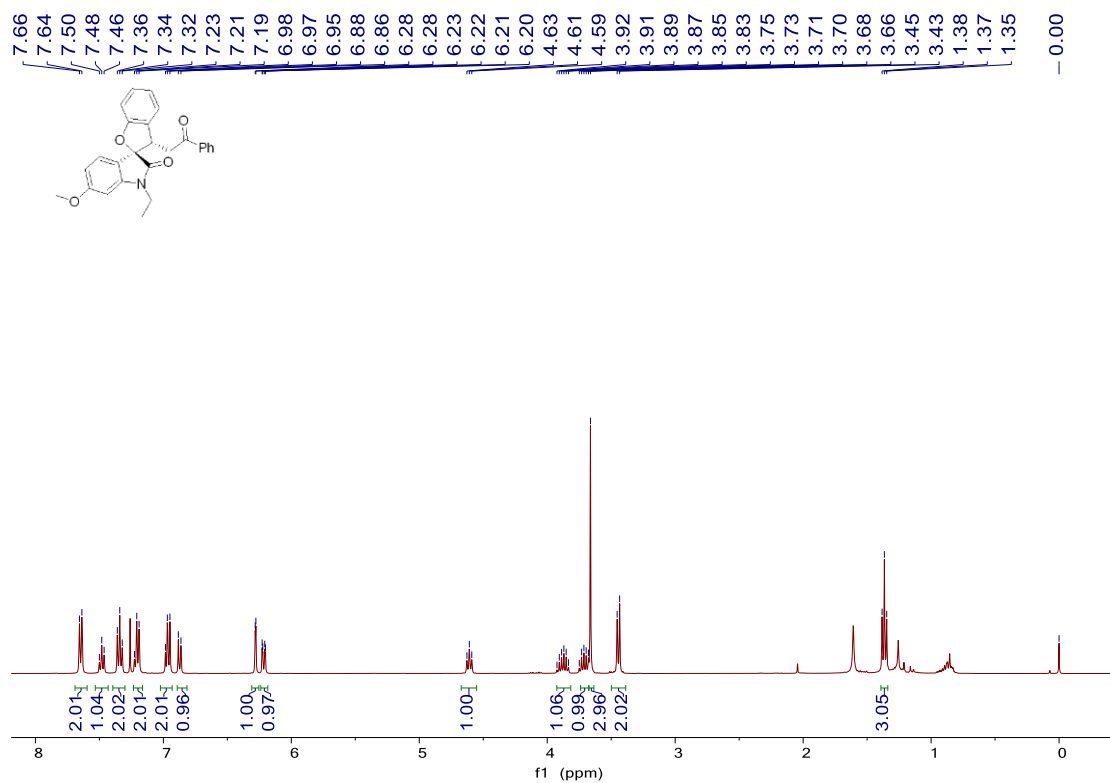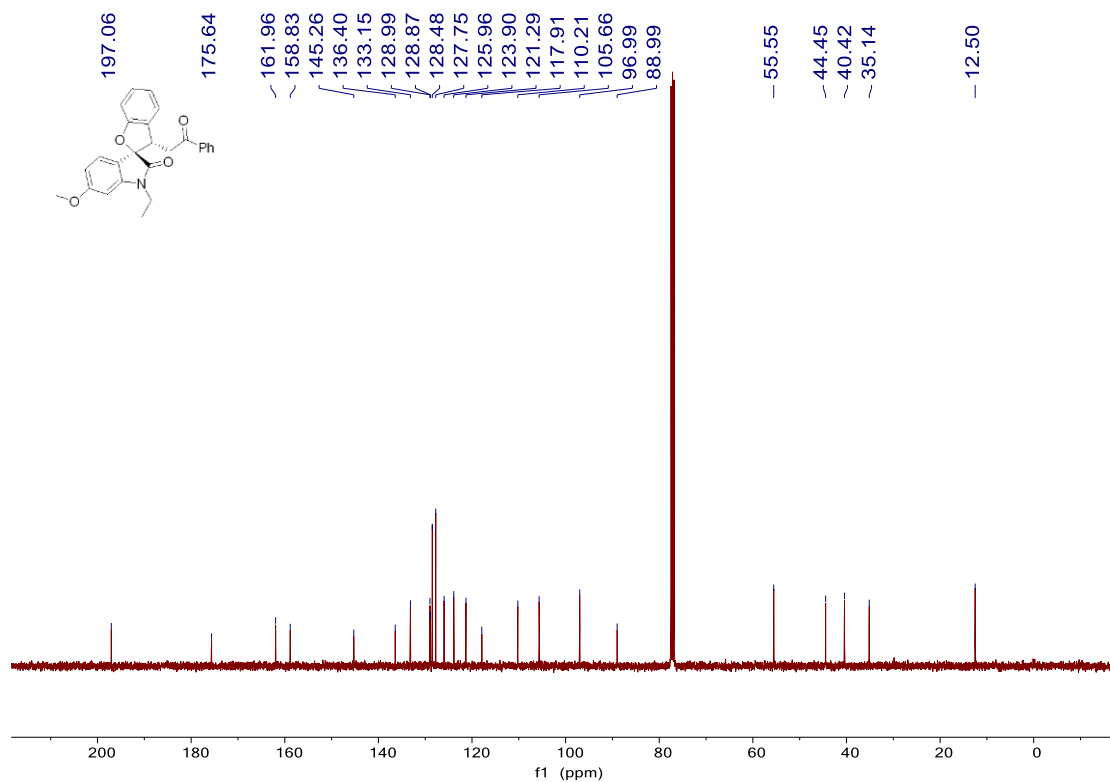

**C10**

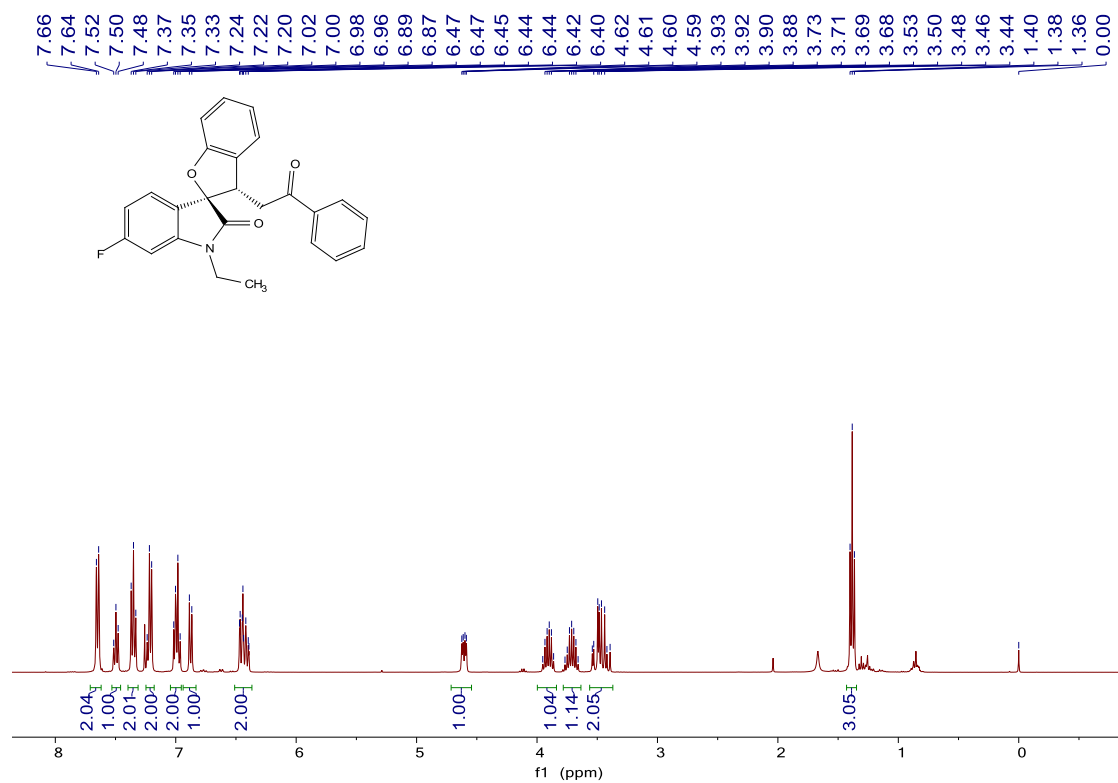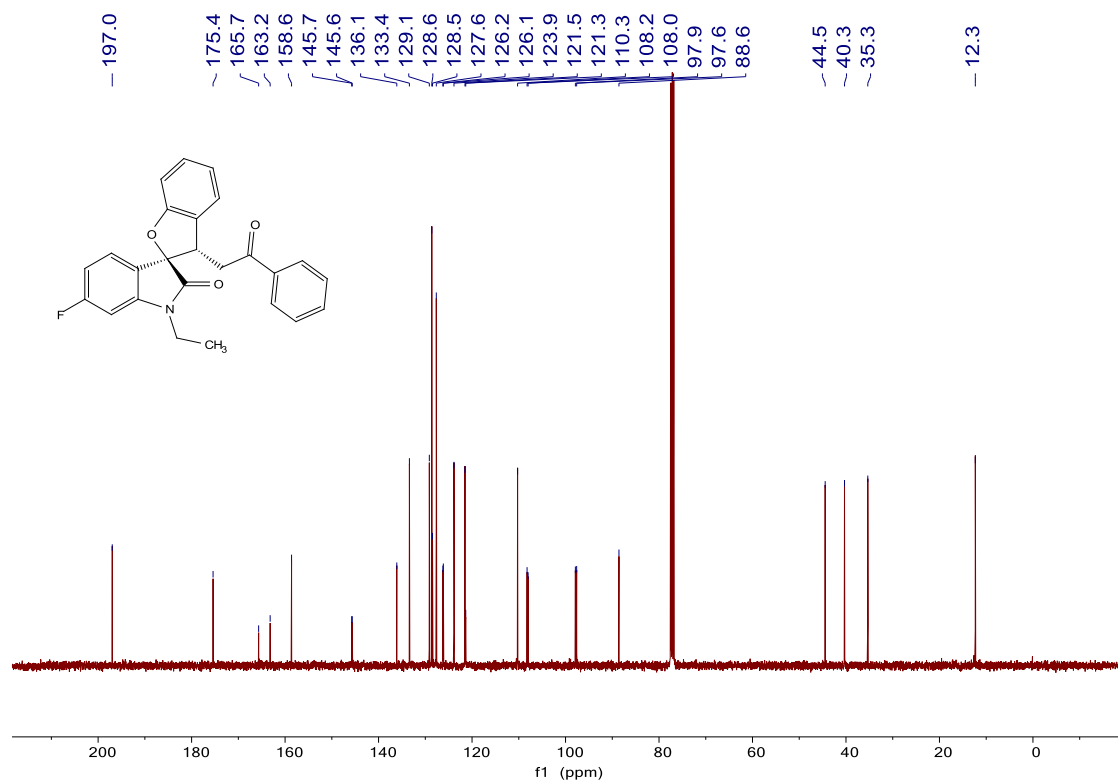



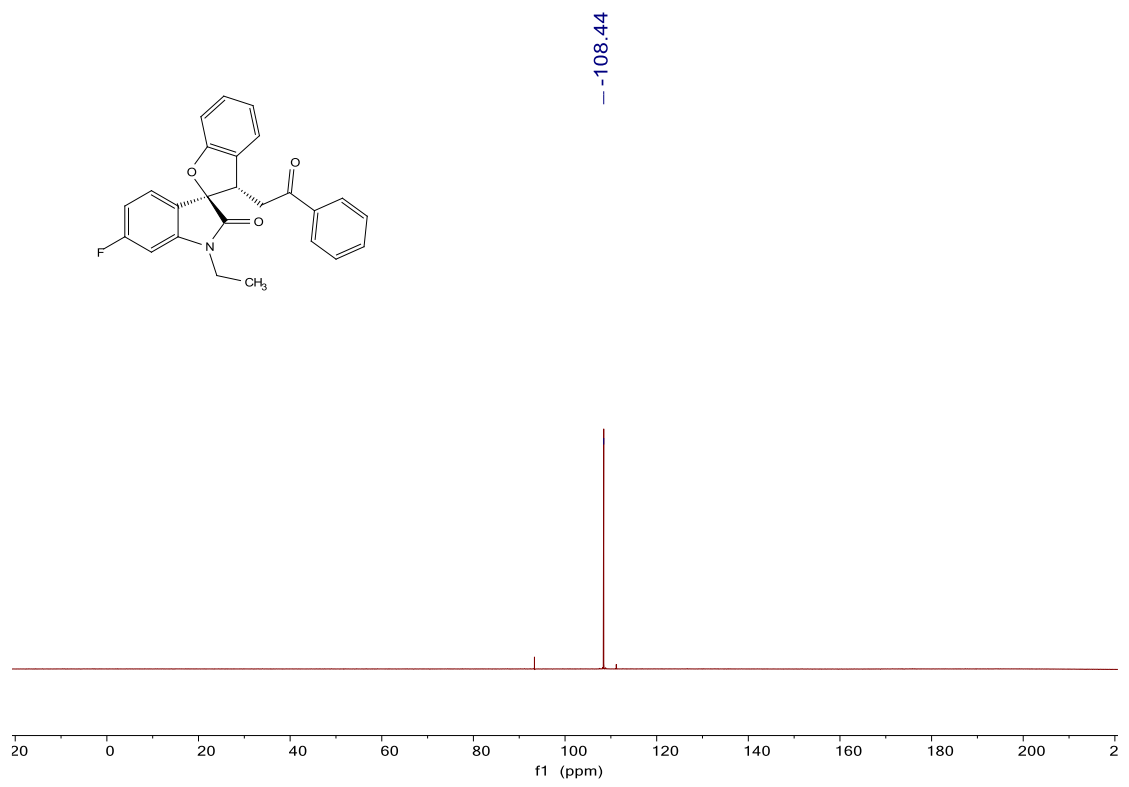

# C11

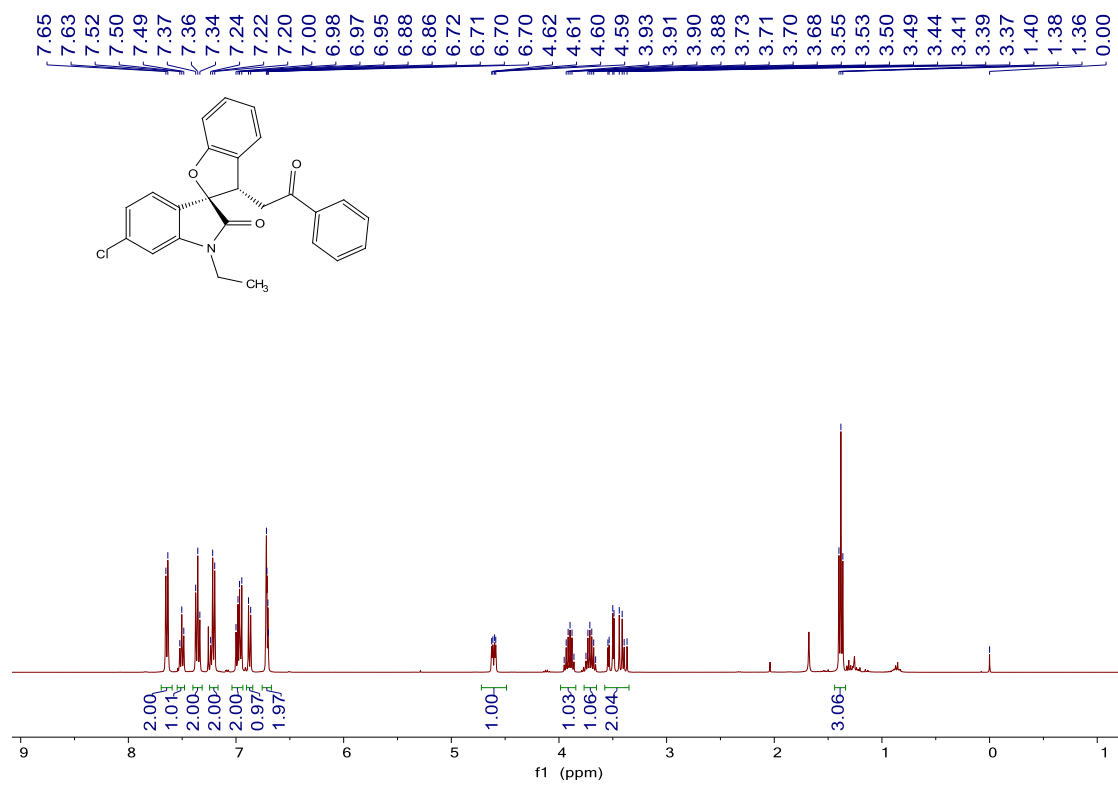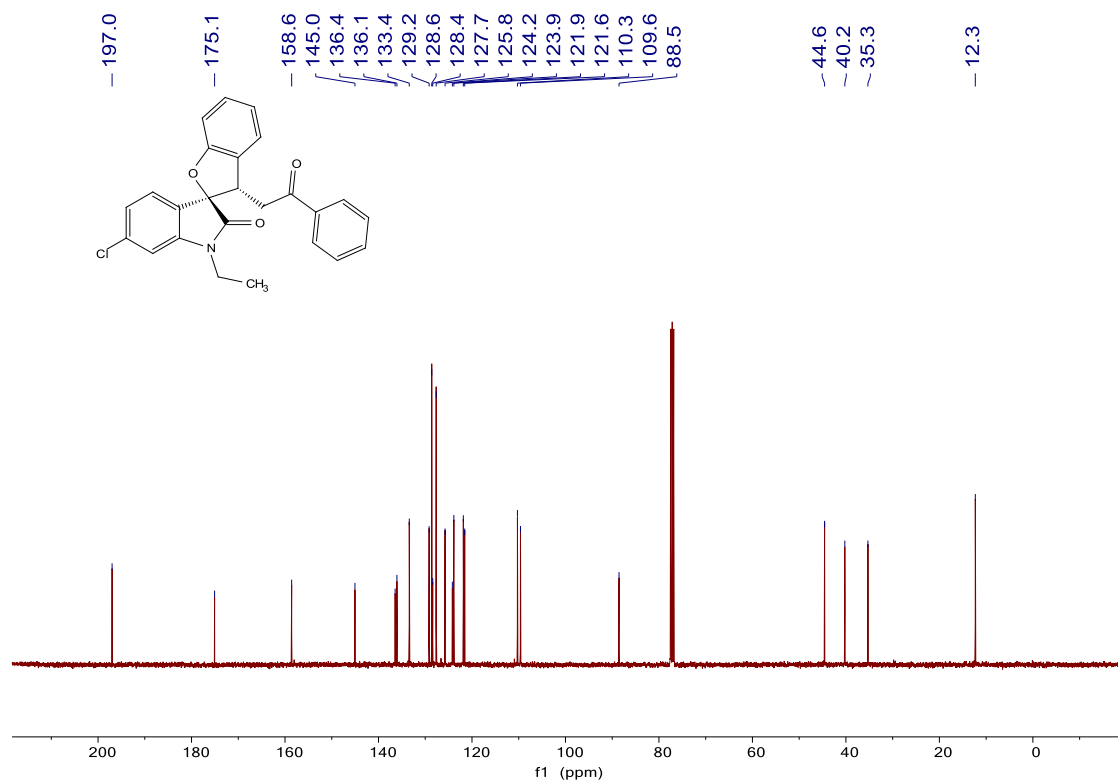

# C12

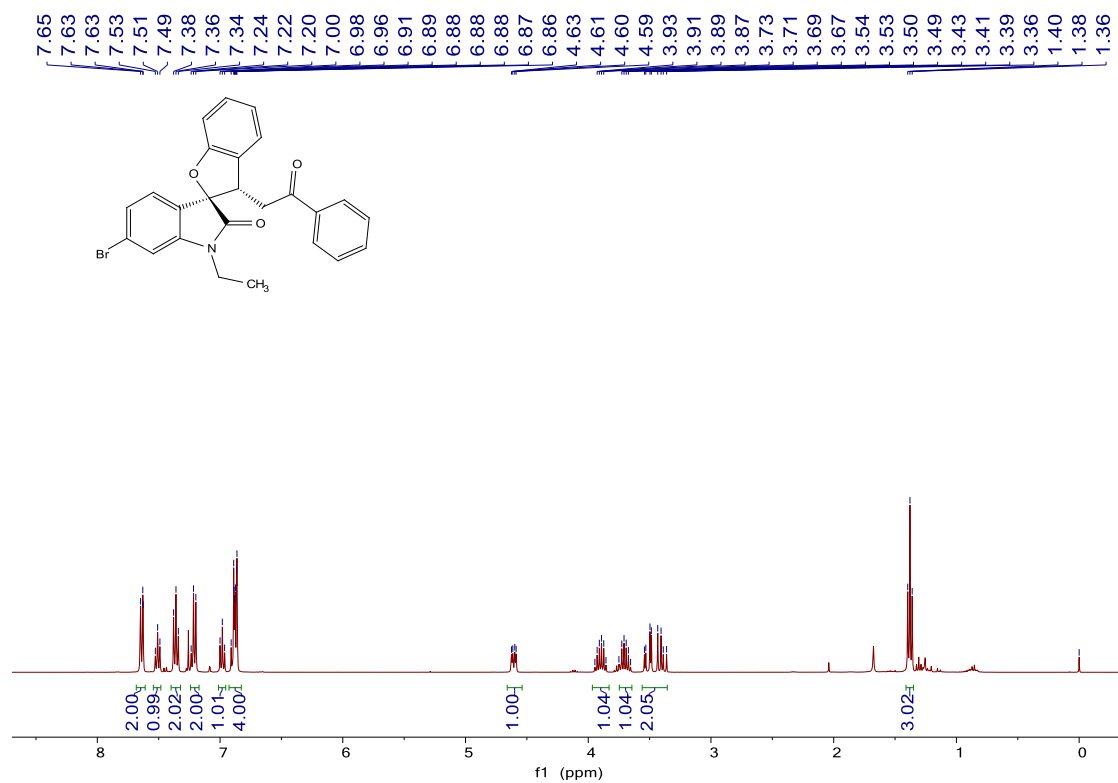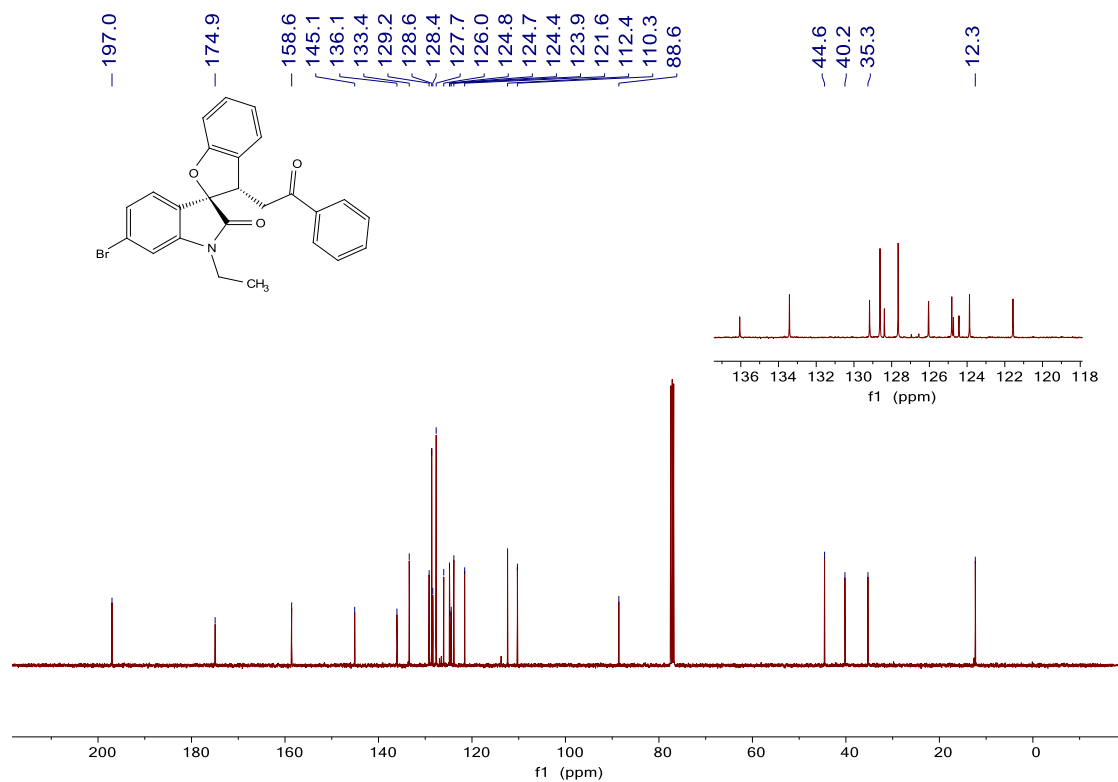

C13

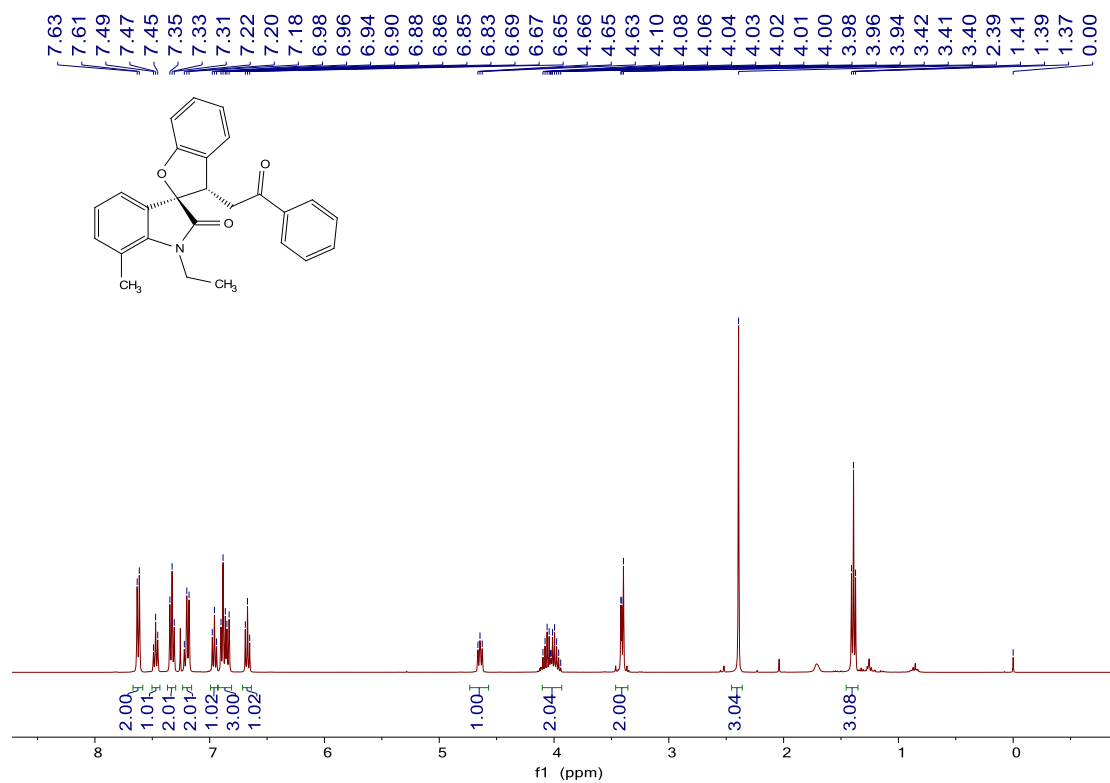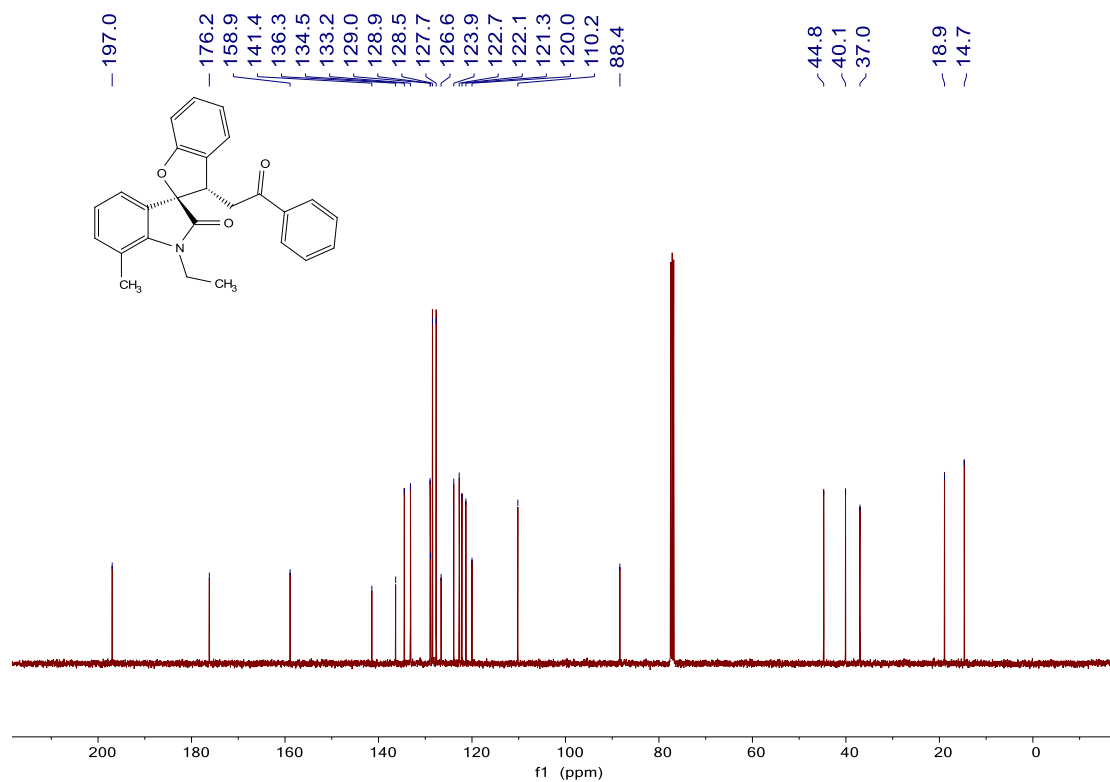

C14

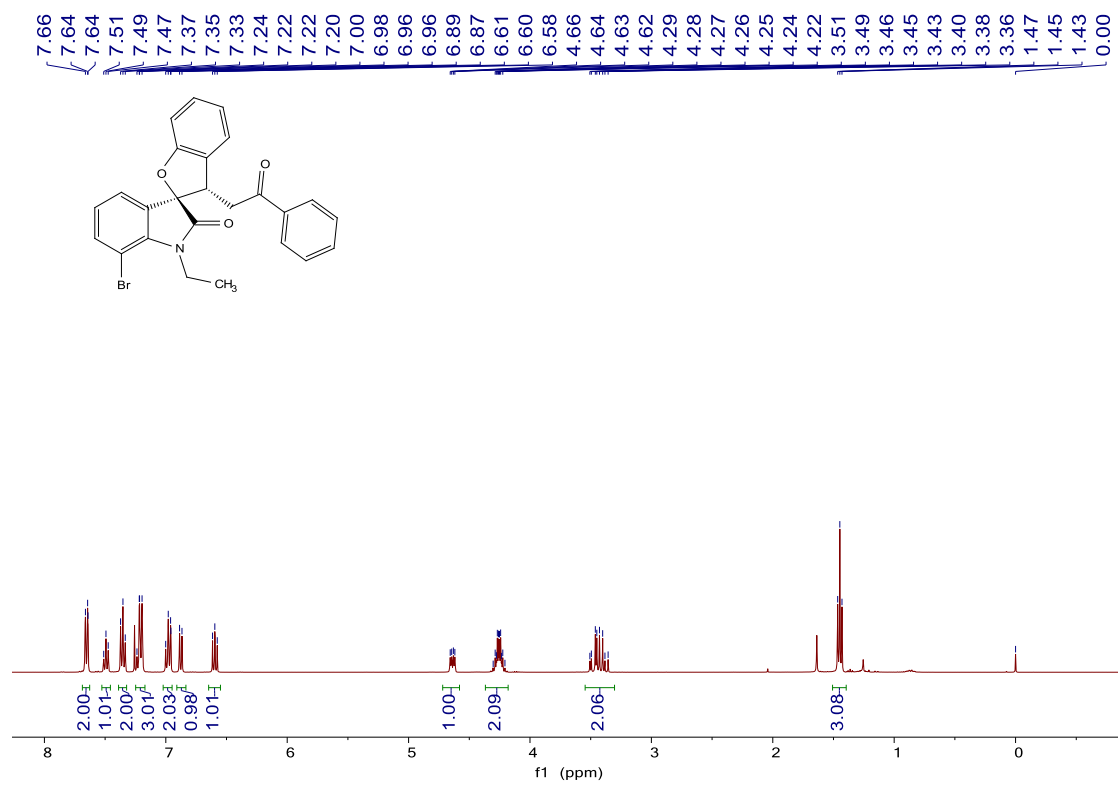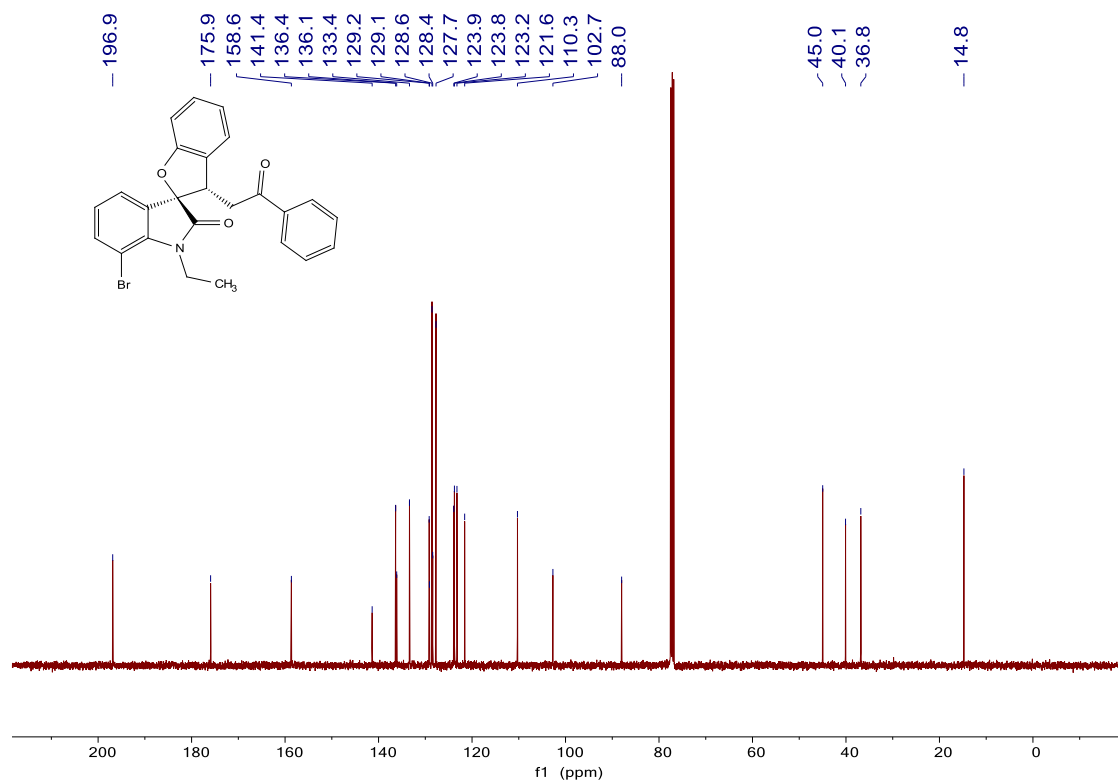

**C15**

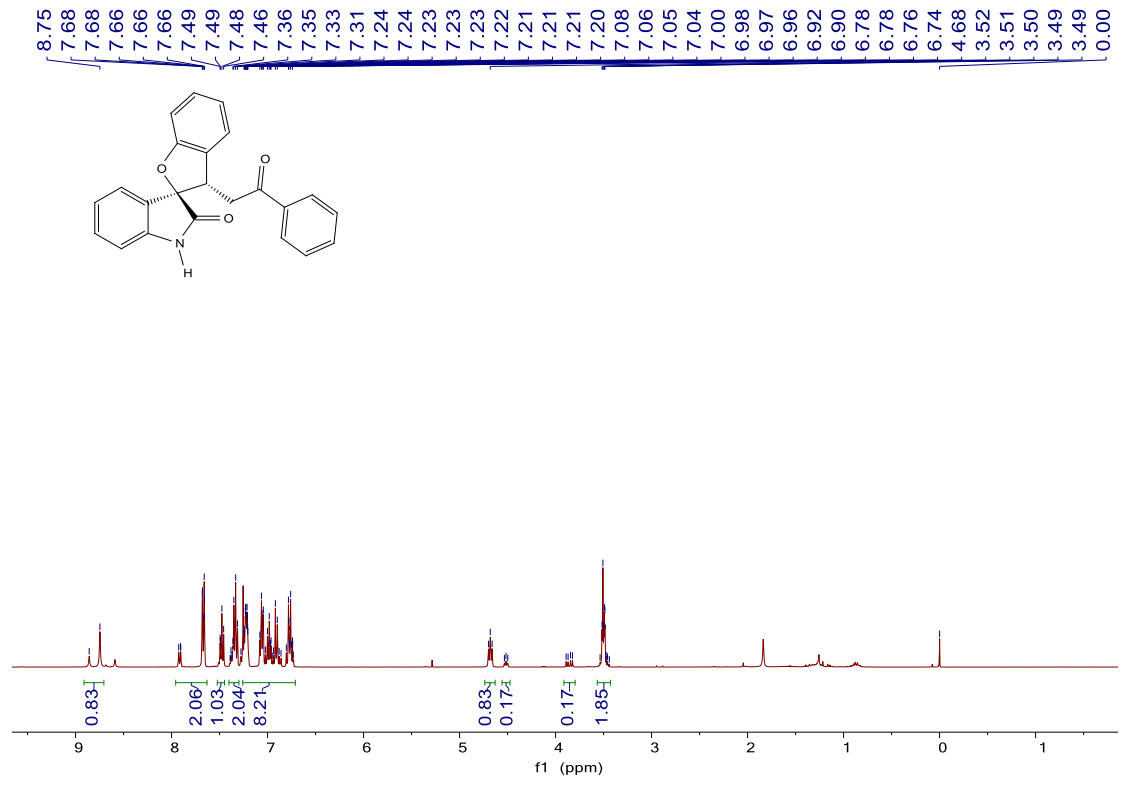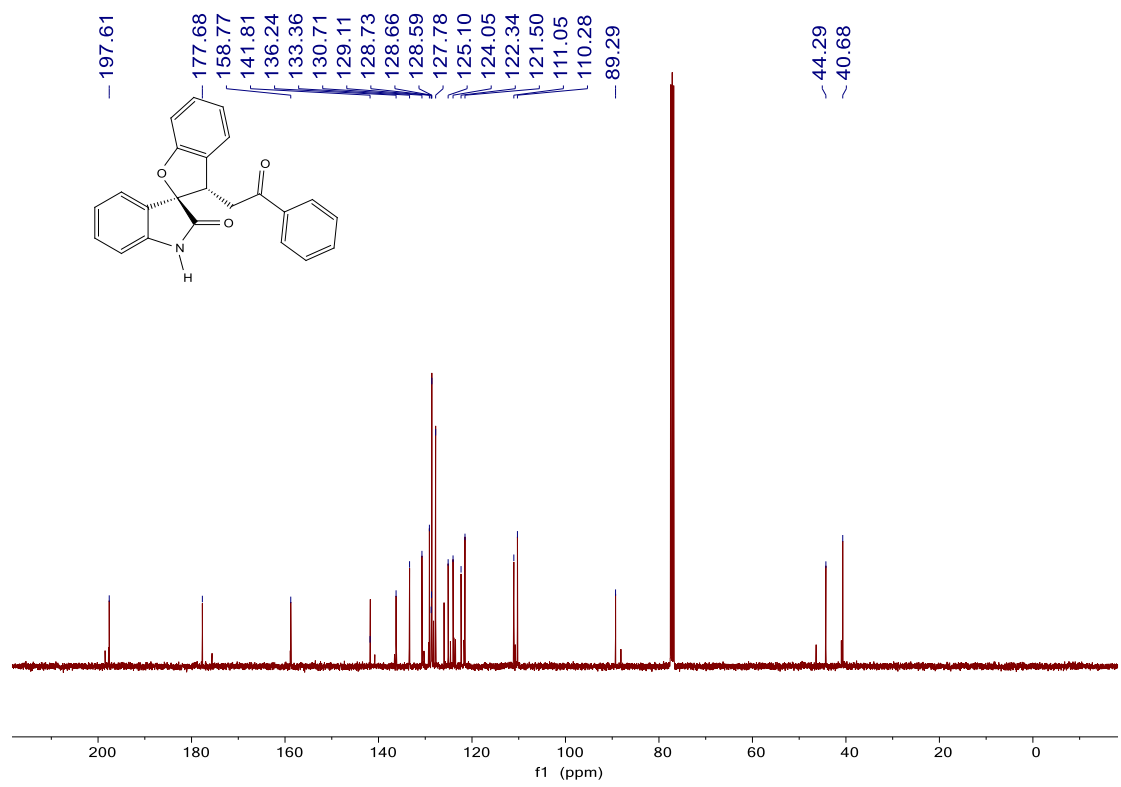

### Minor diastereomer of C15

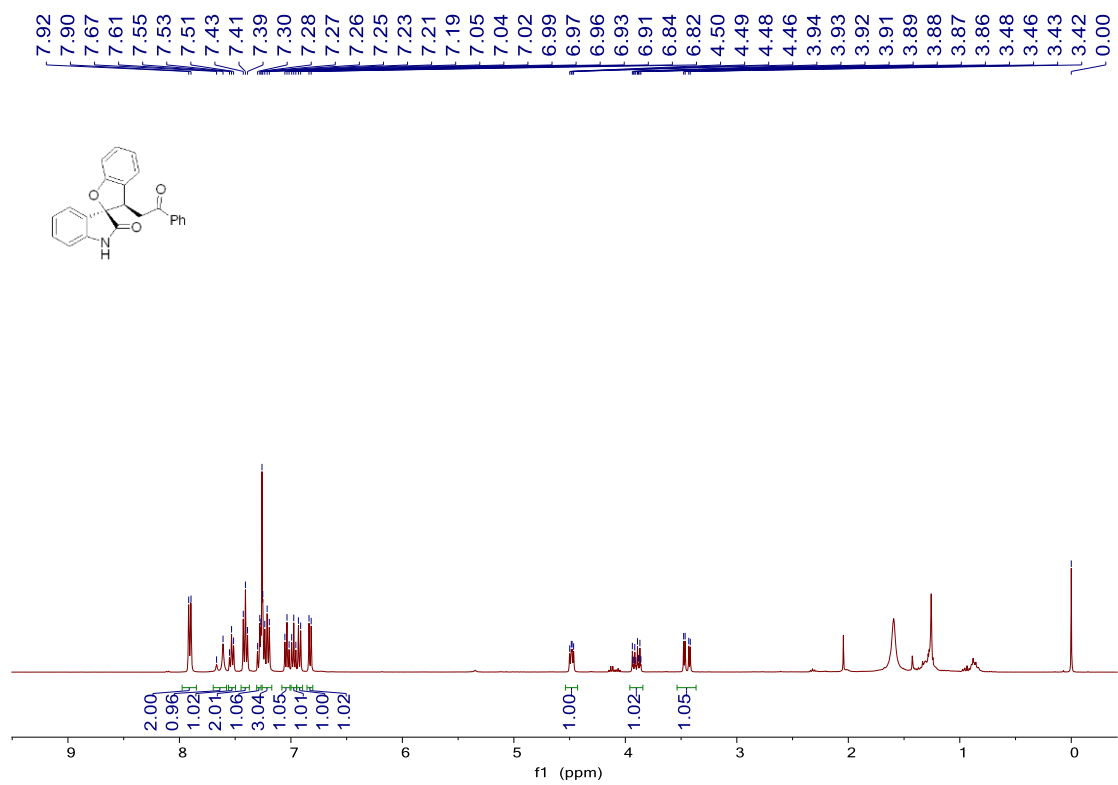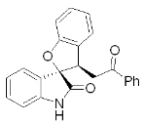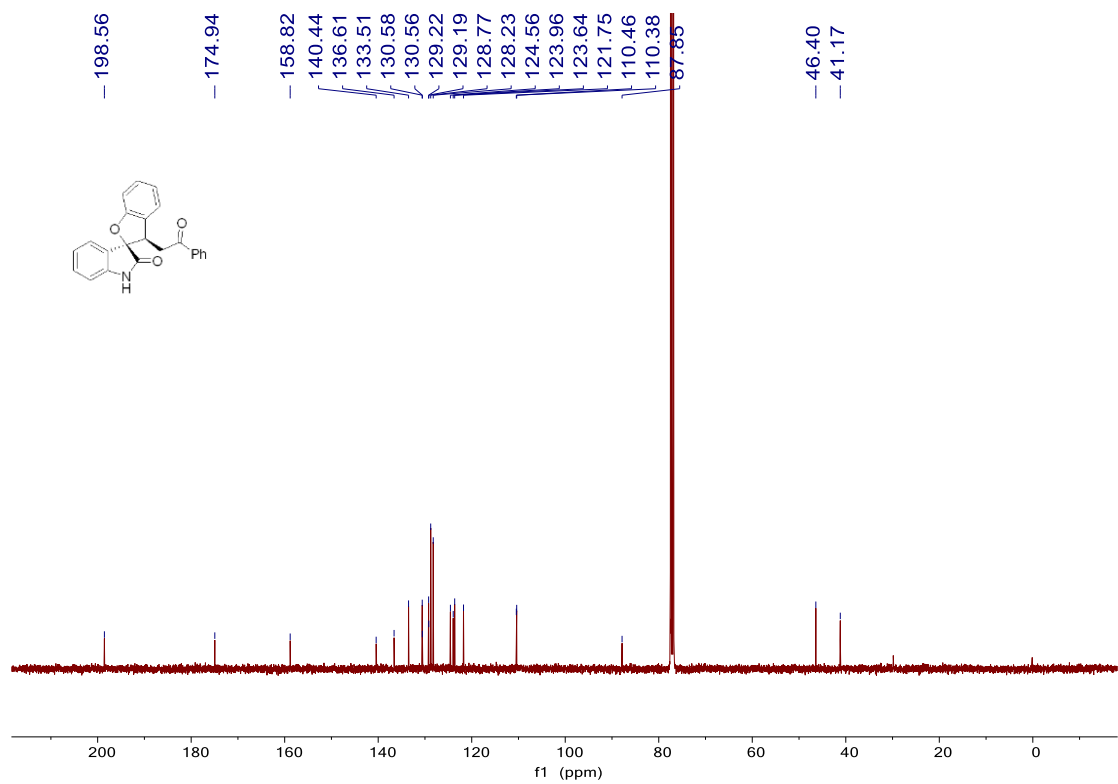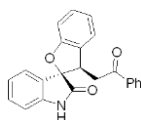

Major diastereomer of C15

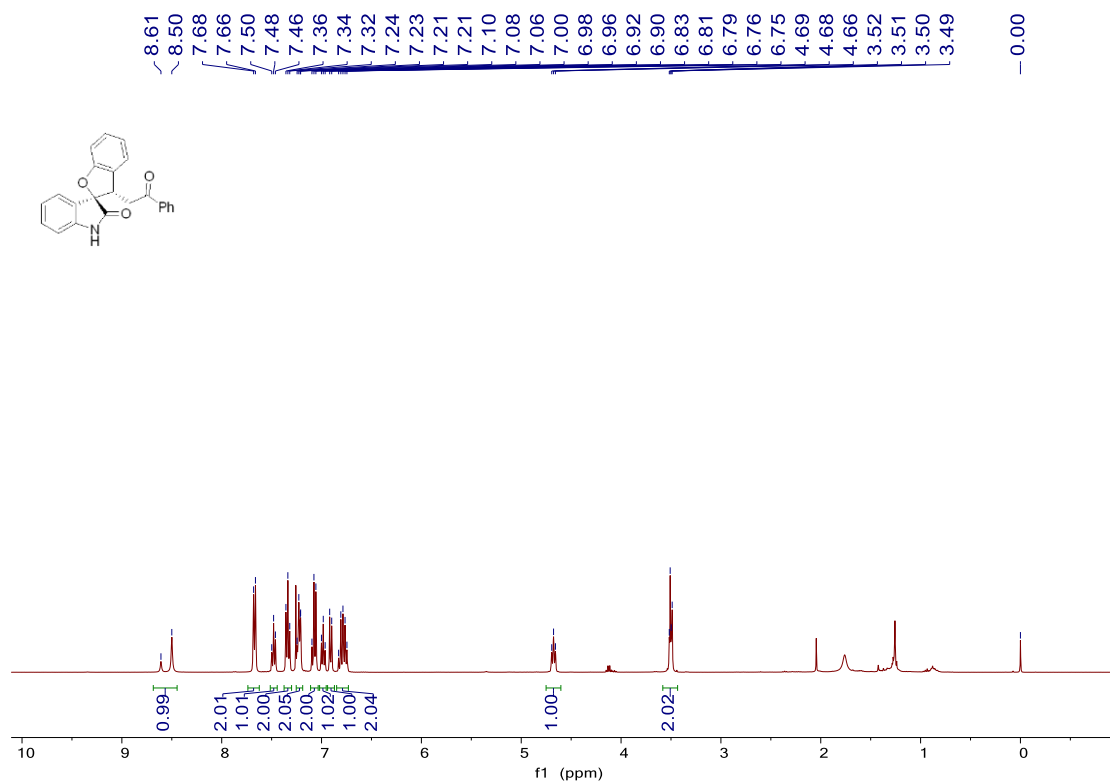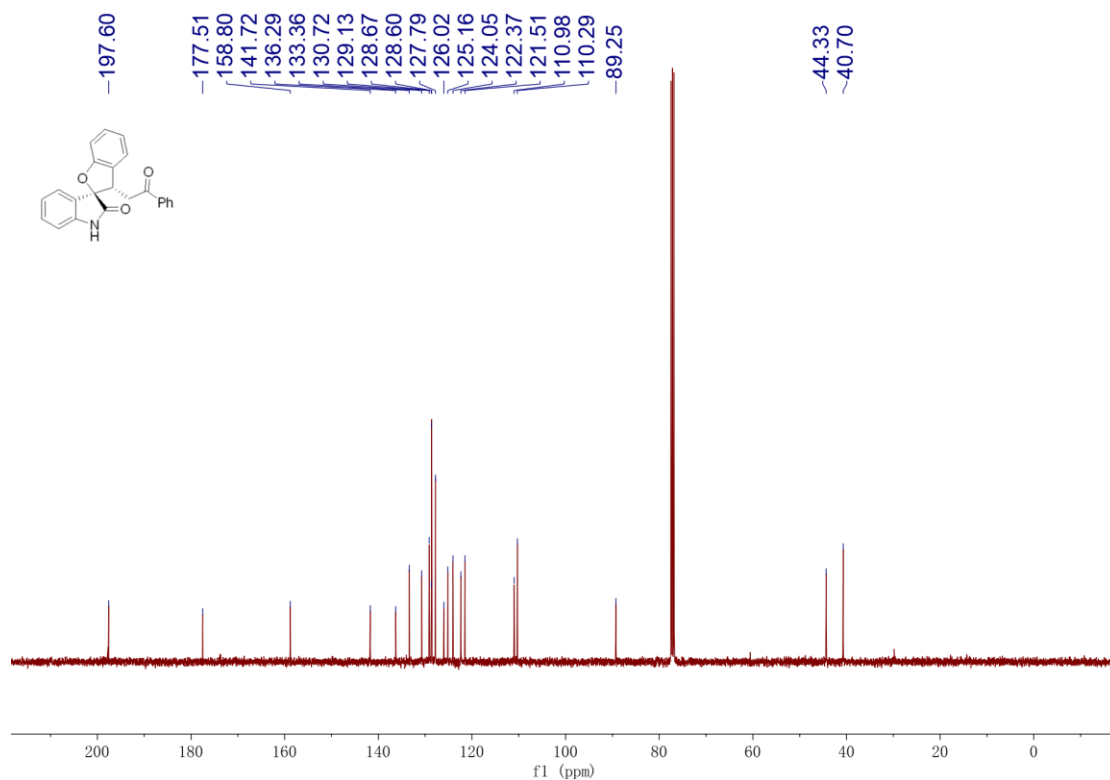



# C16

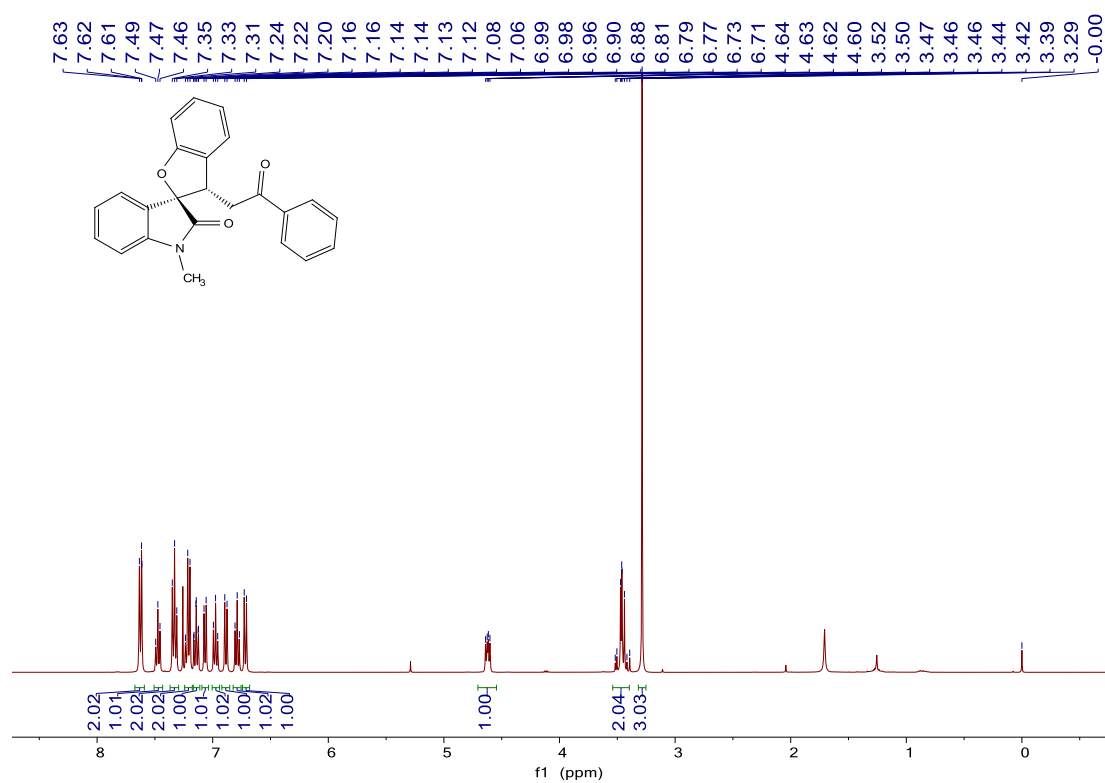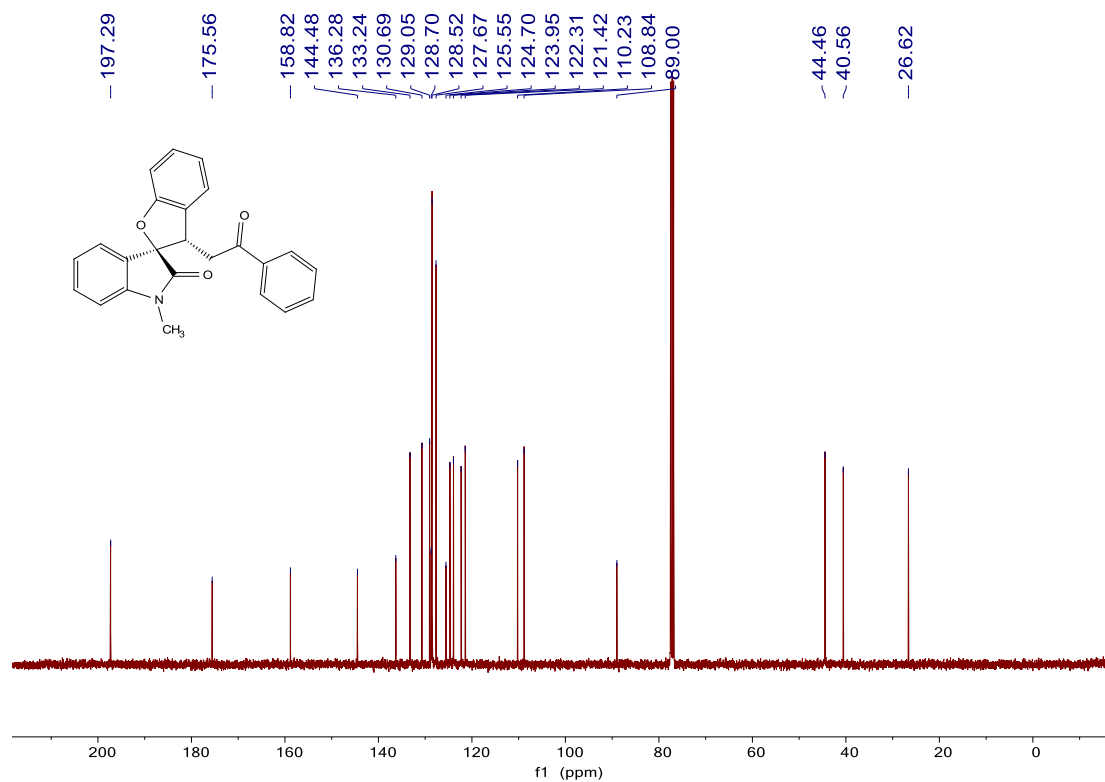



**C18**

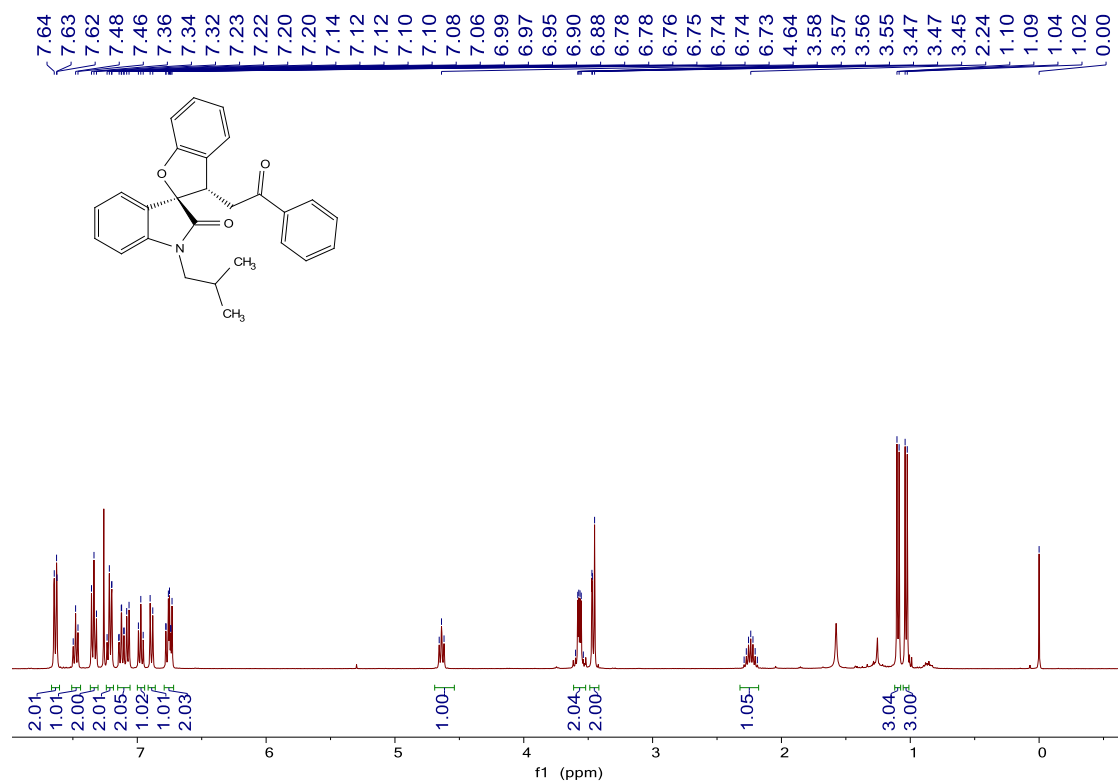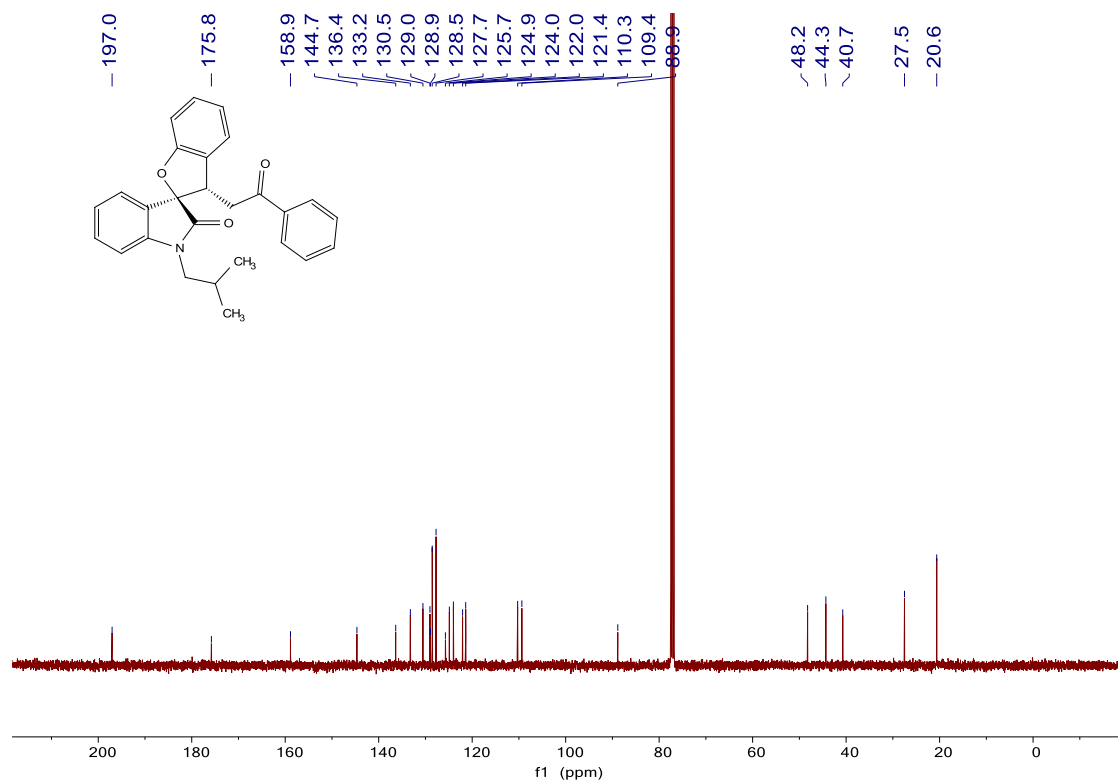

**C19**

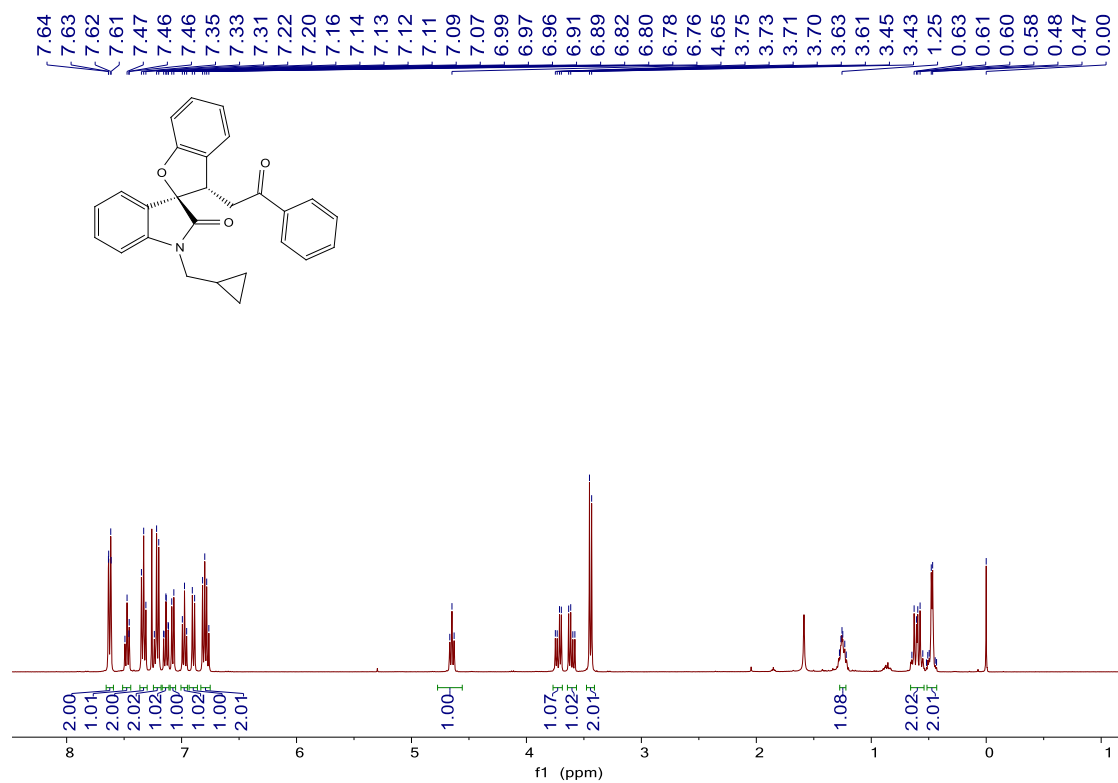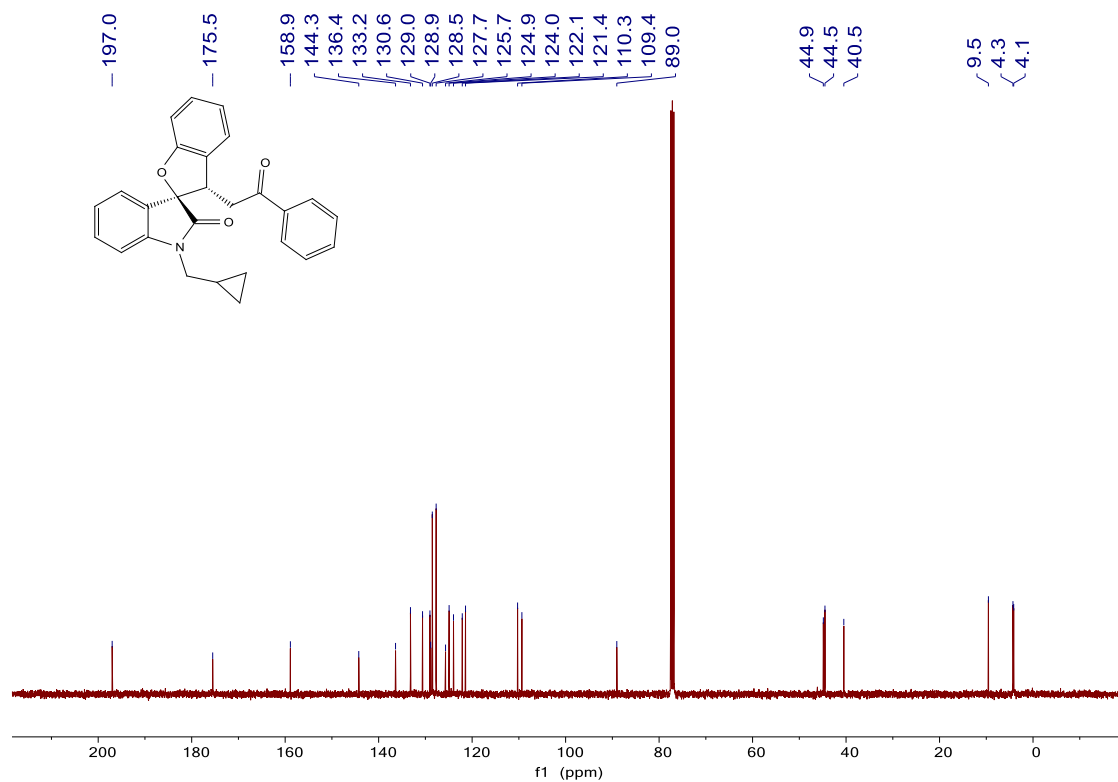

C20

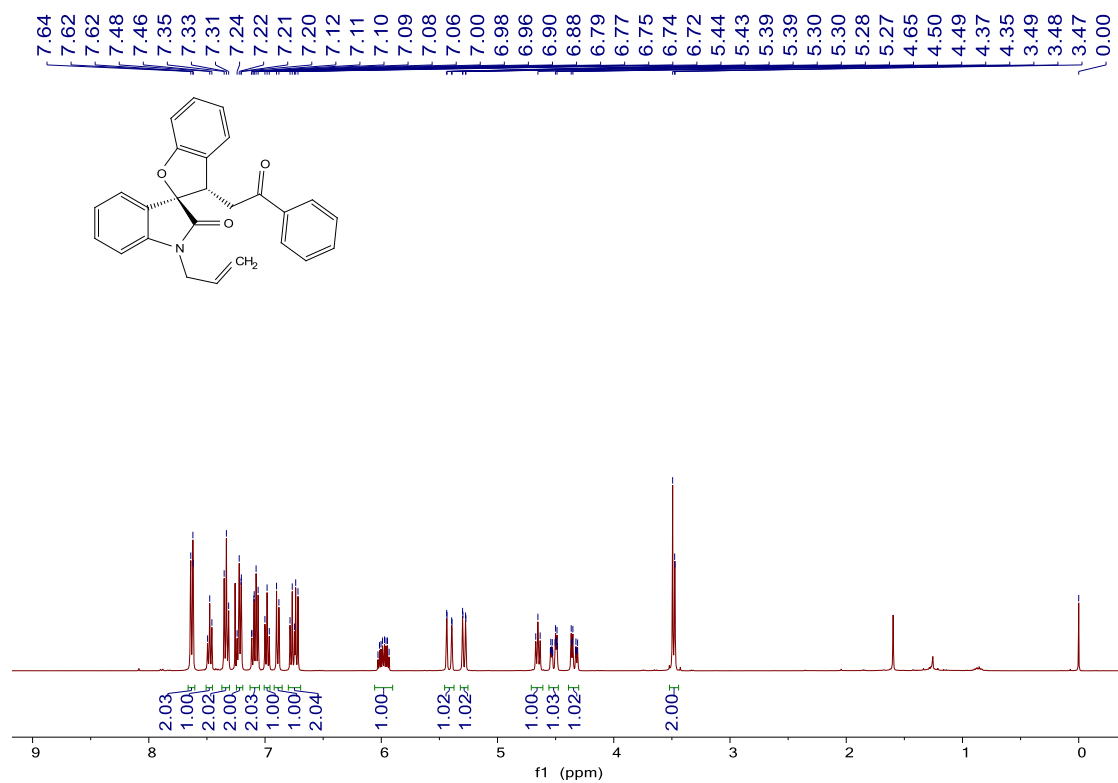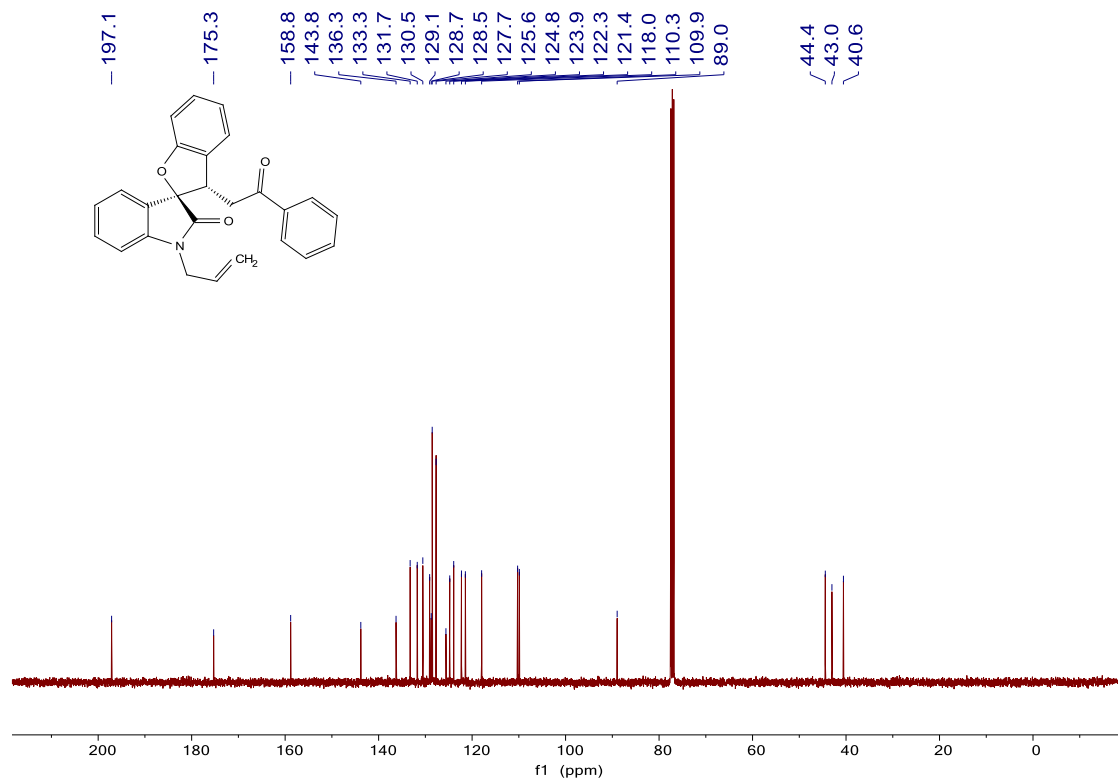

C21

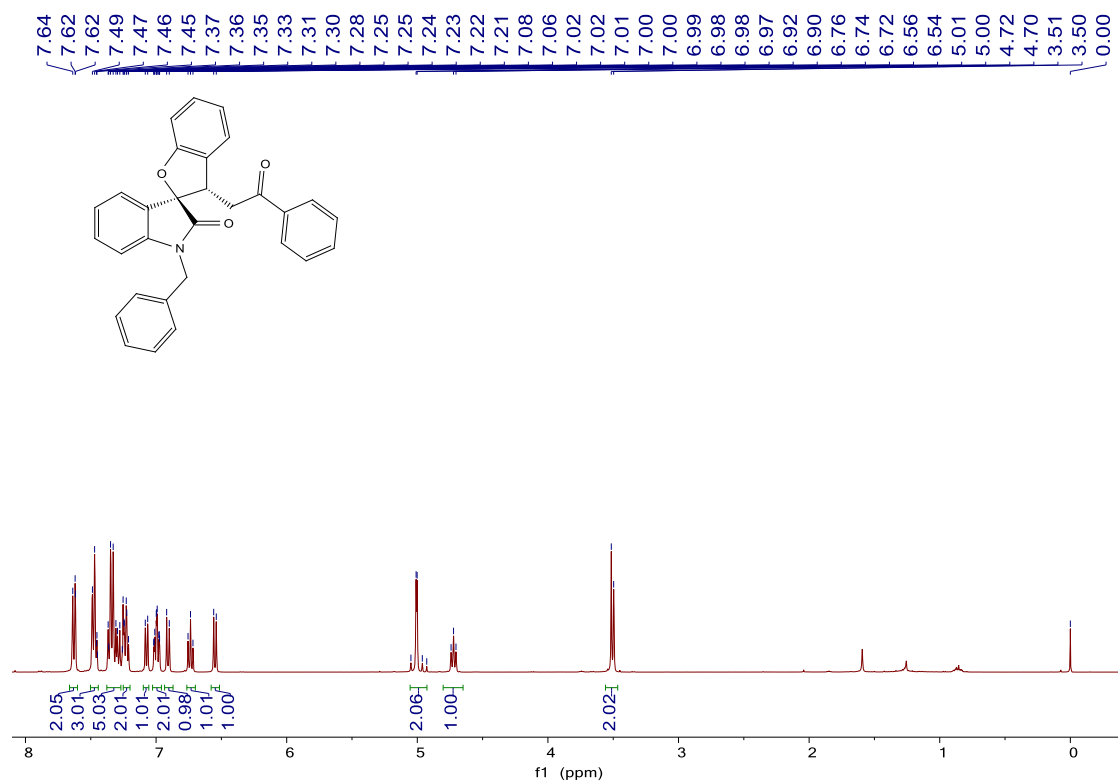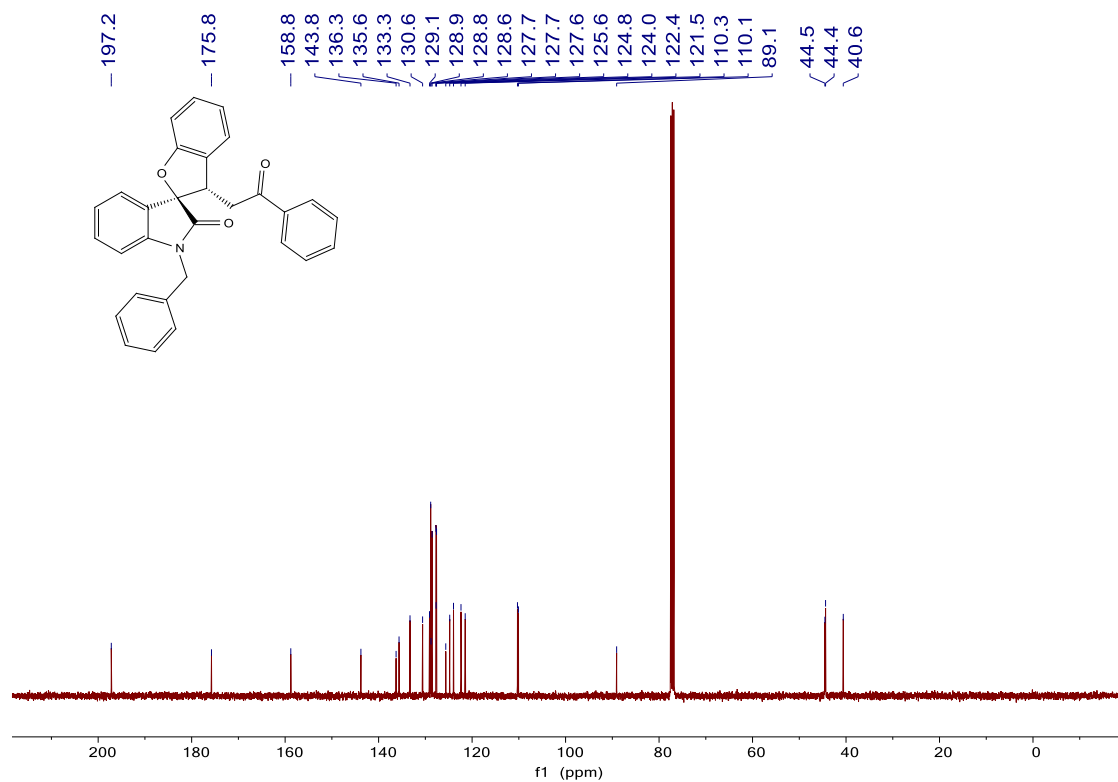

C22

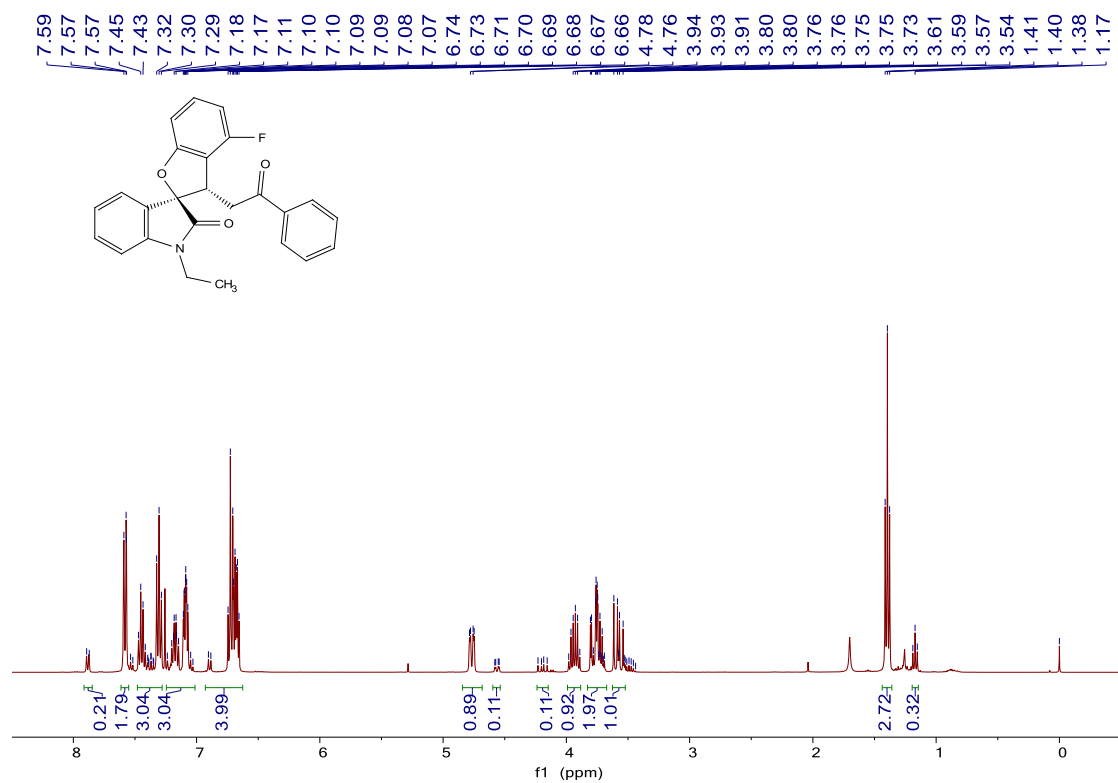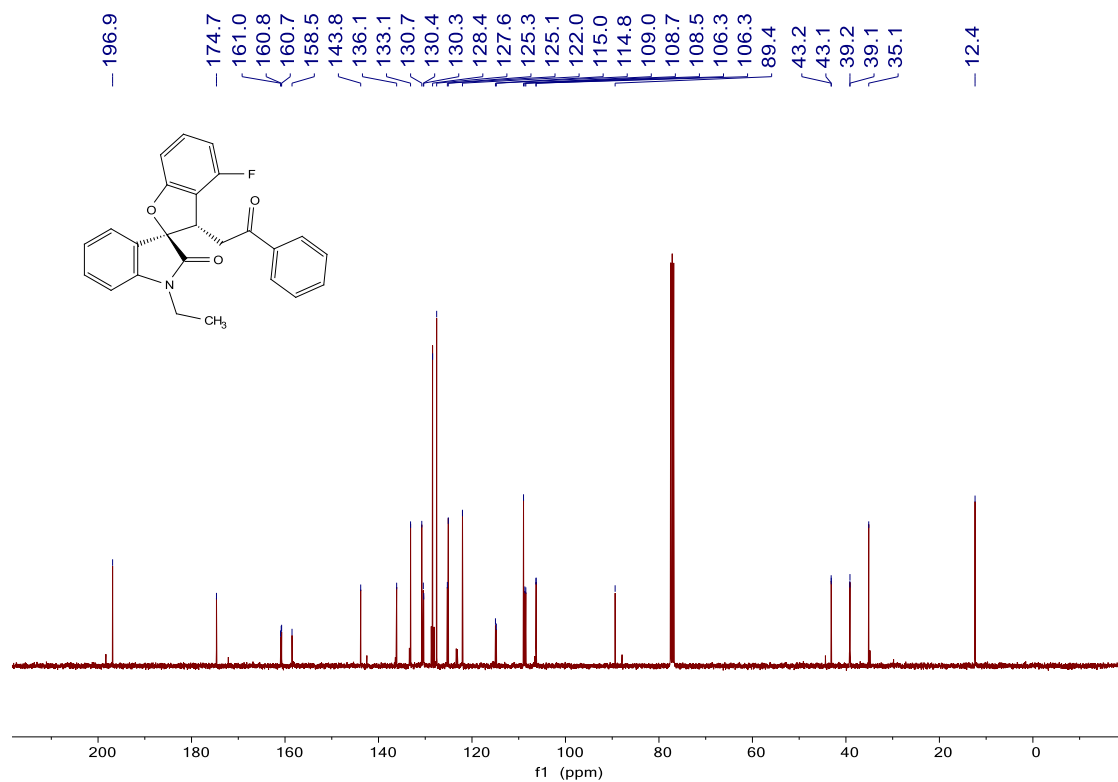

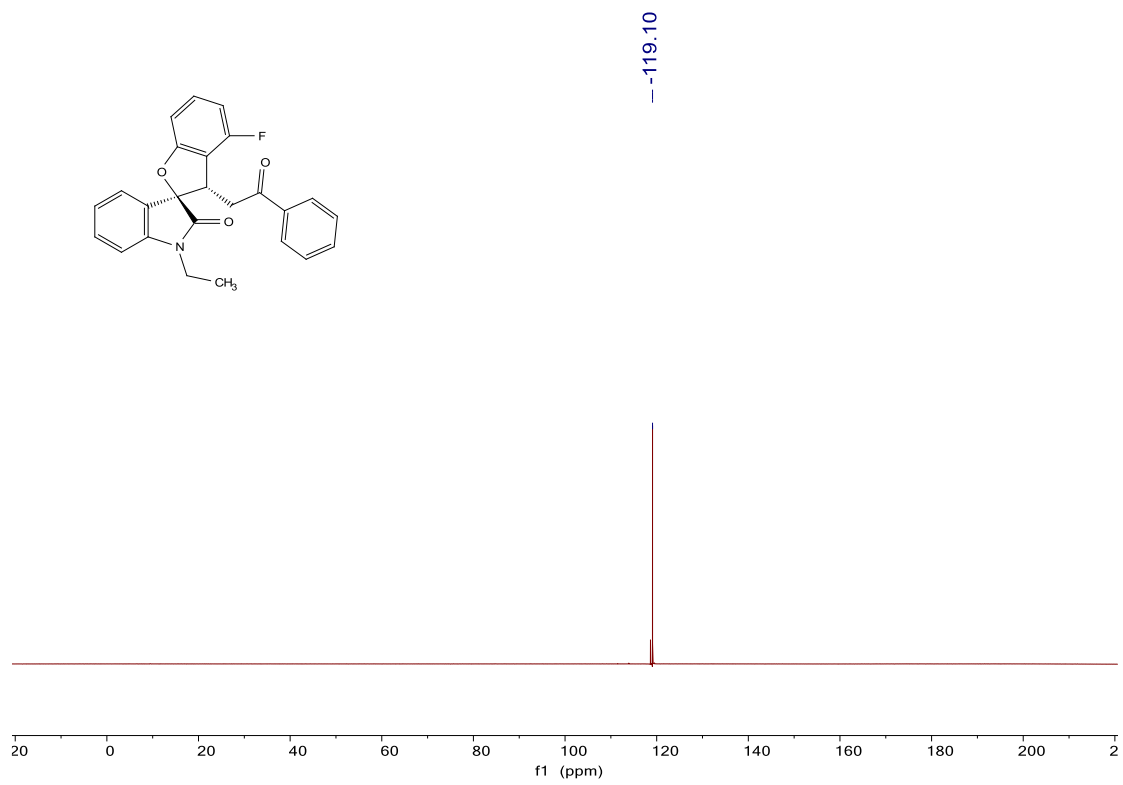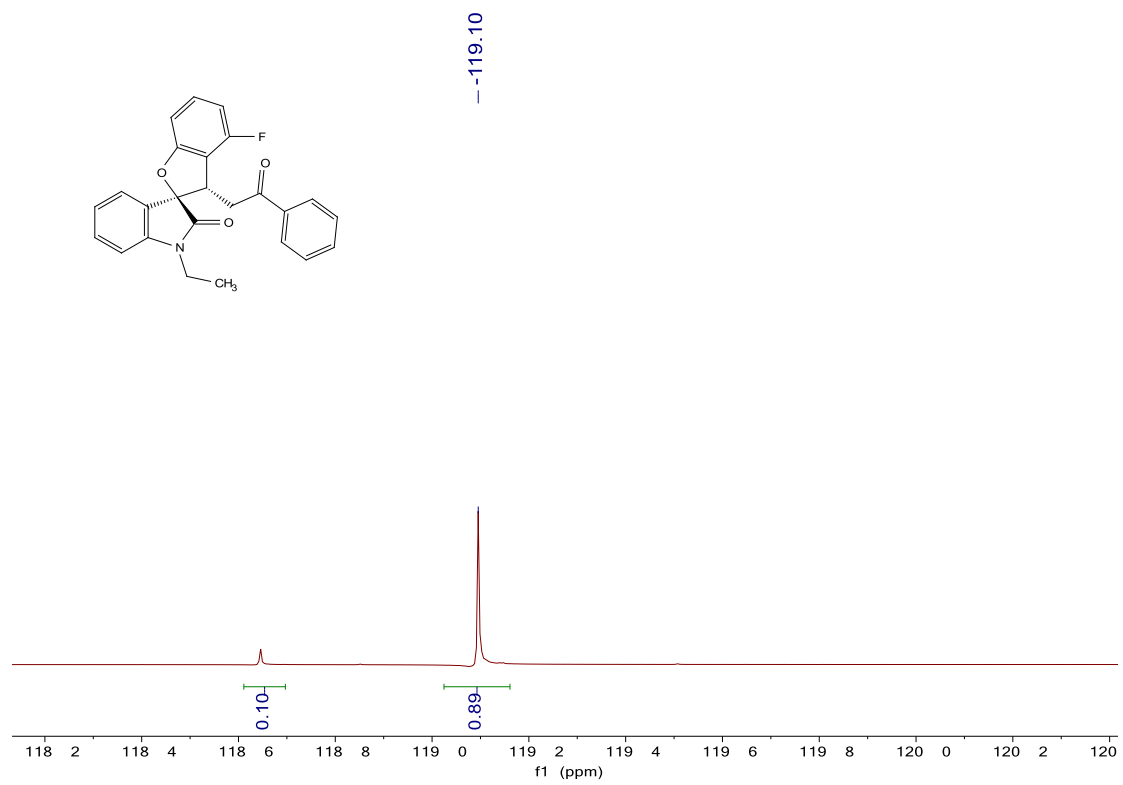



Minor diastereomer of C22

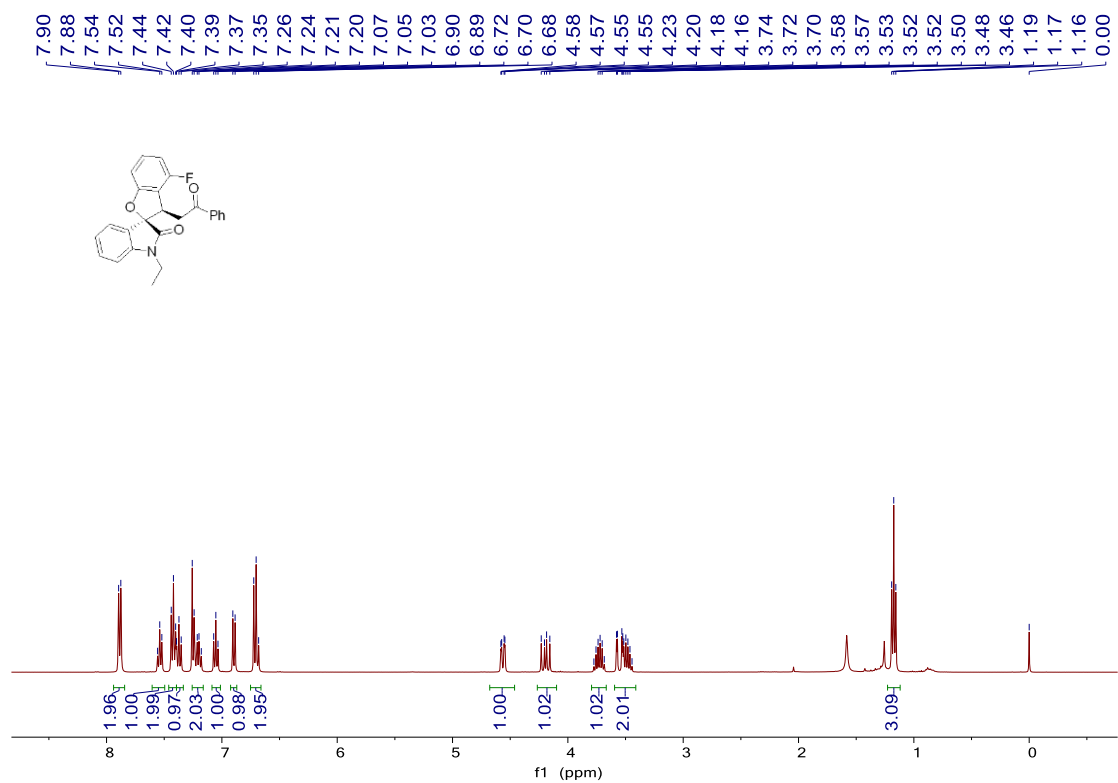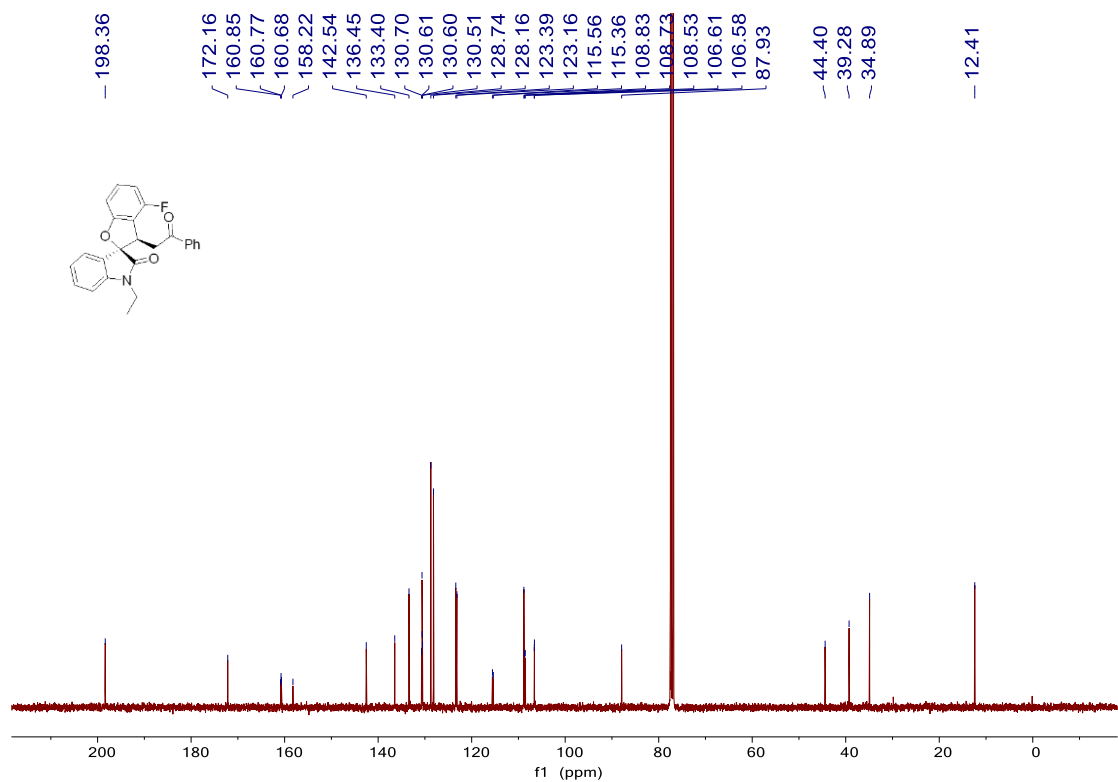

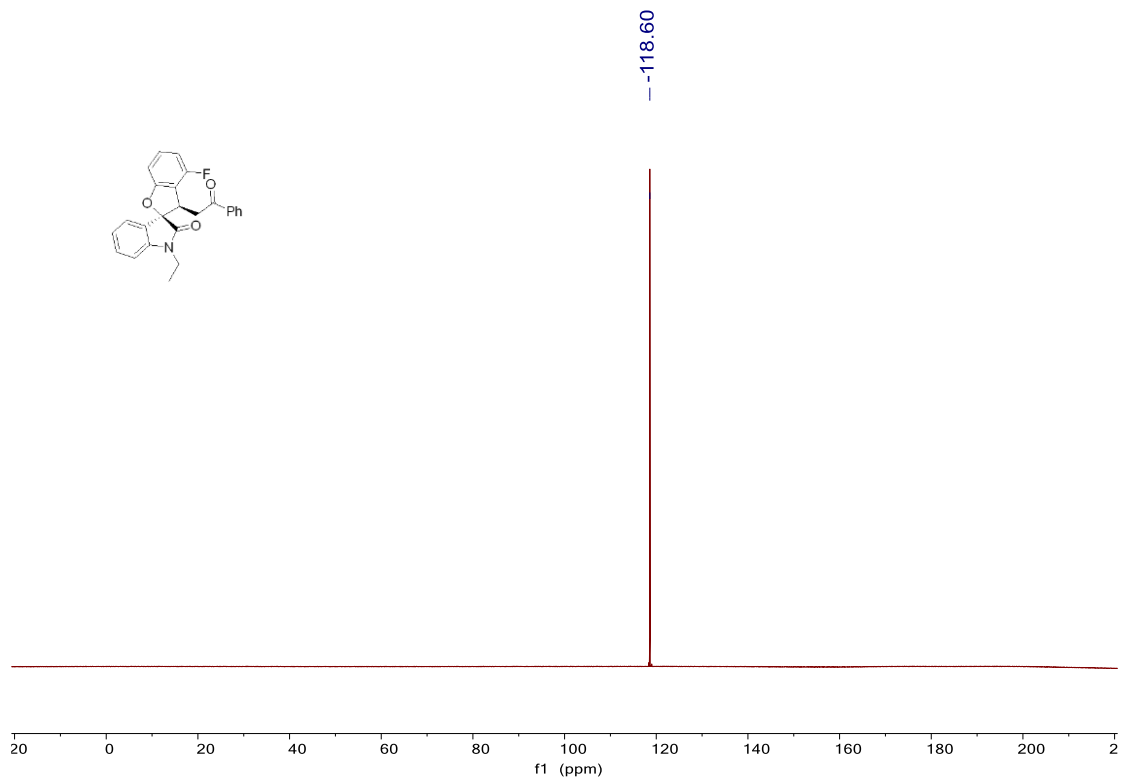

**Major diastereomer of C22**

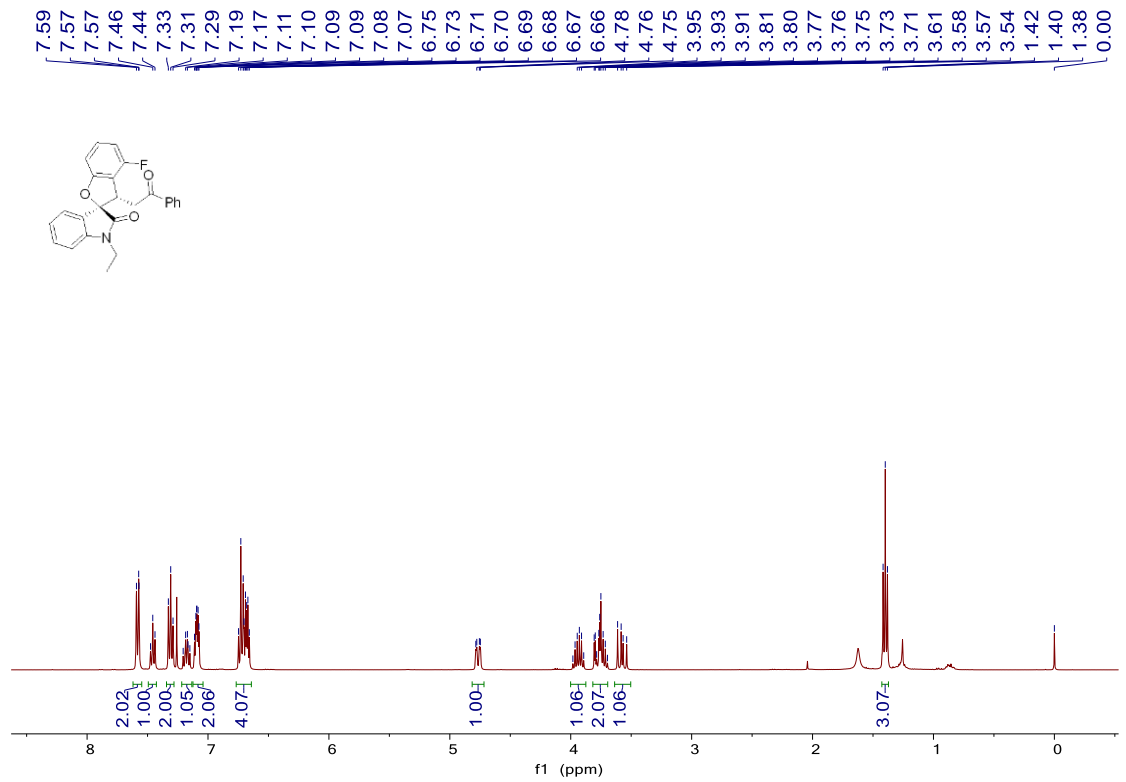

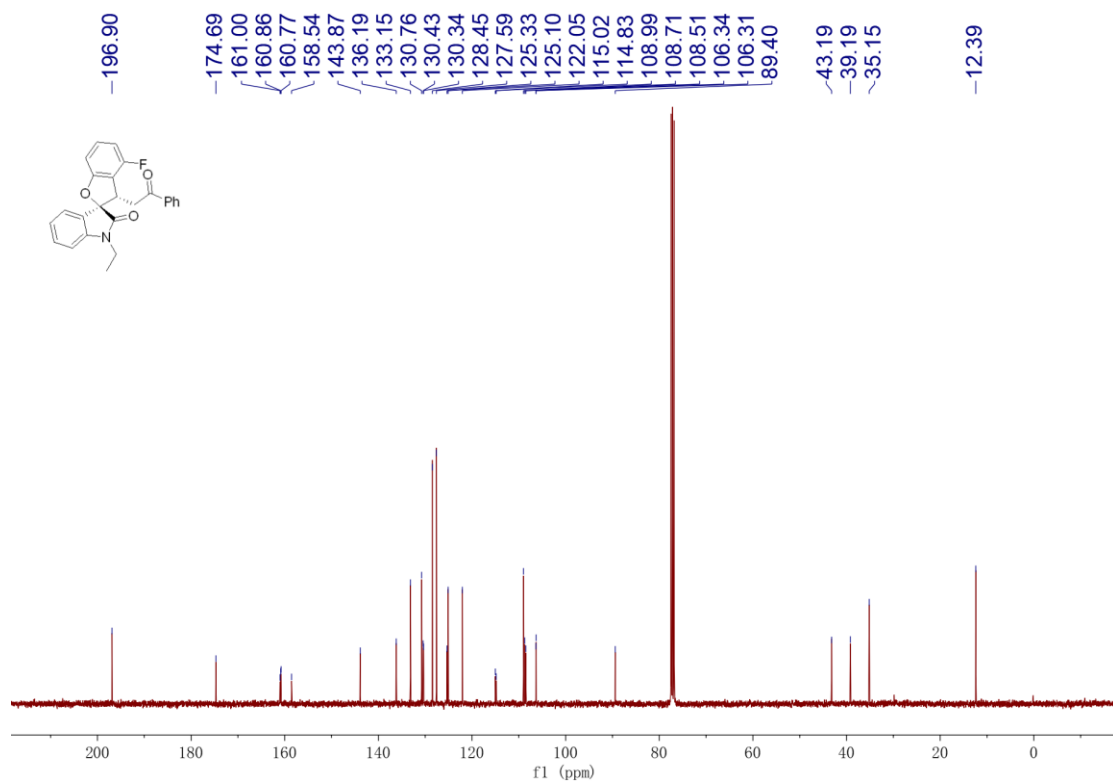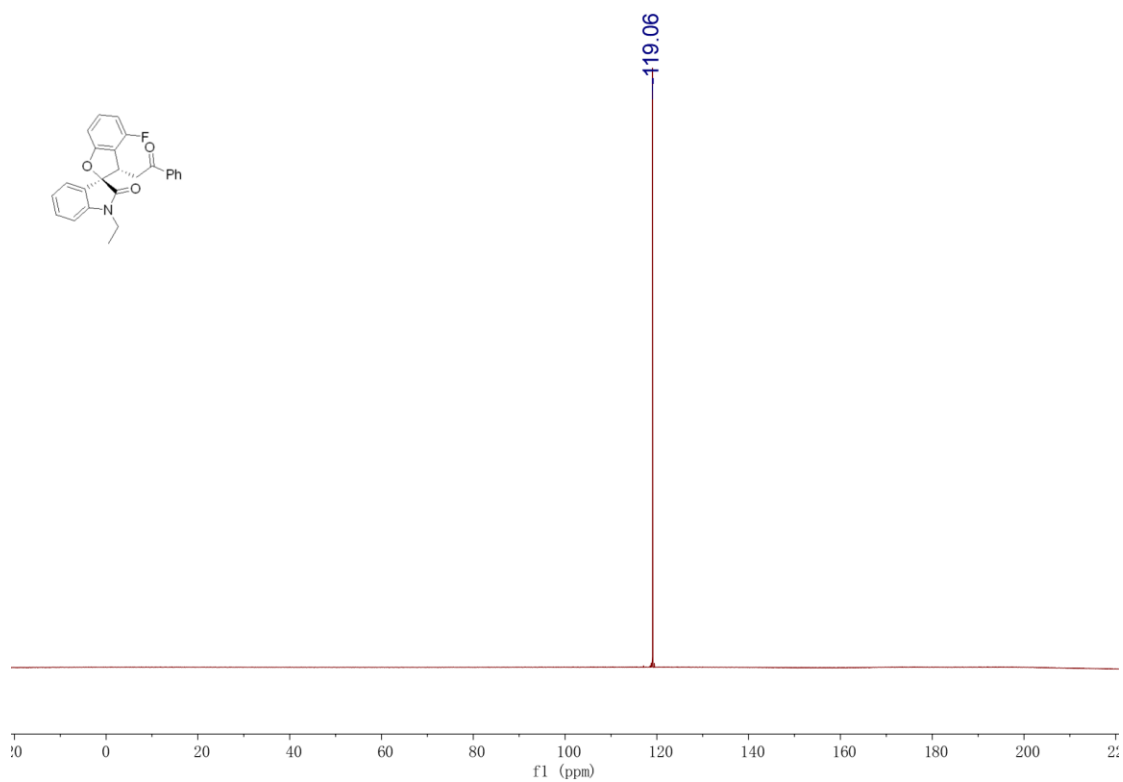

C23

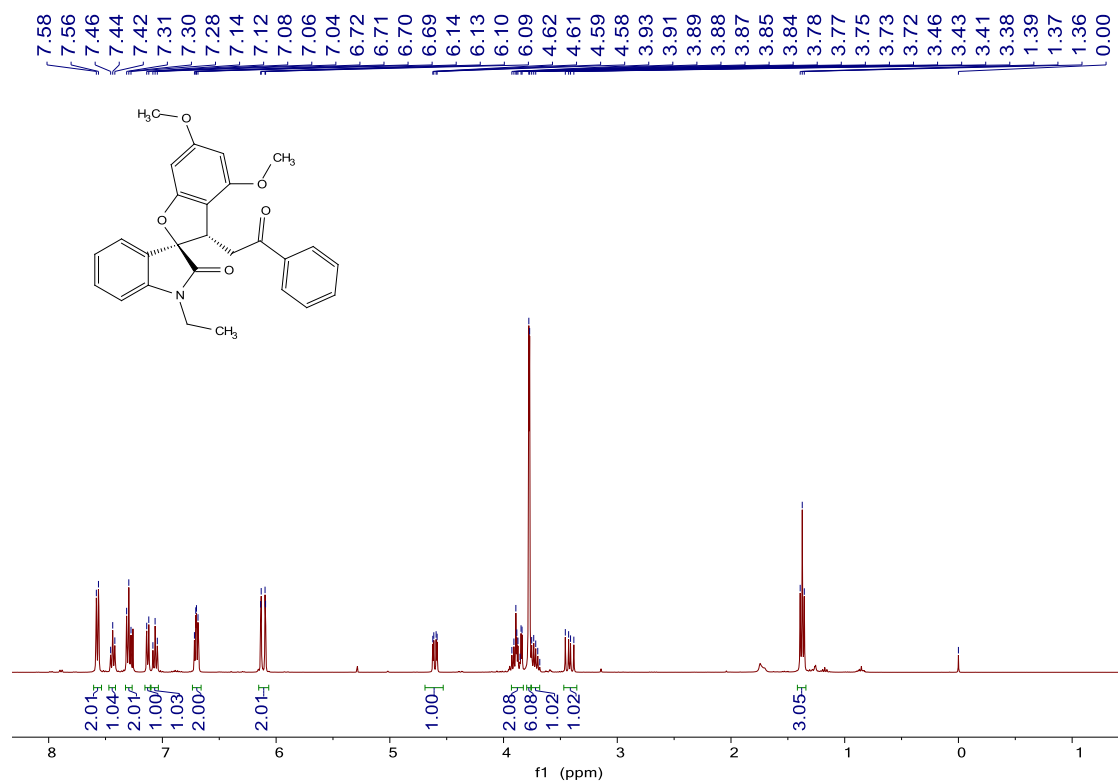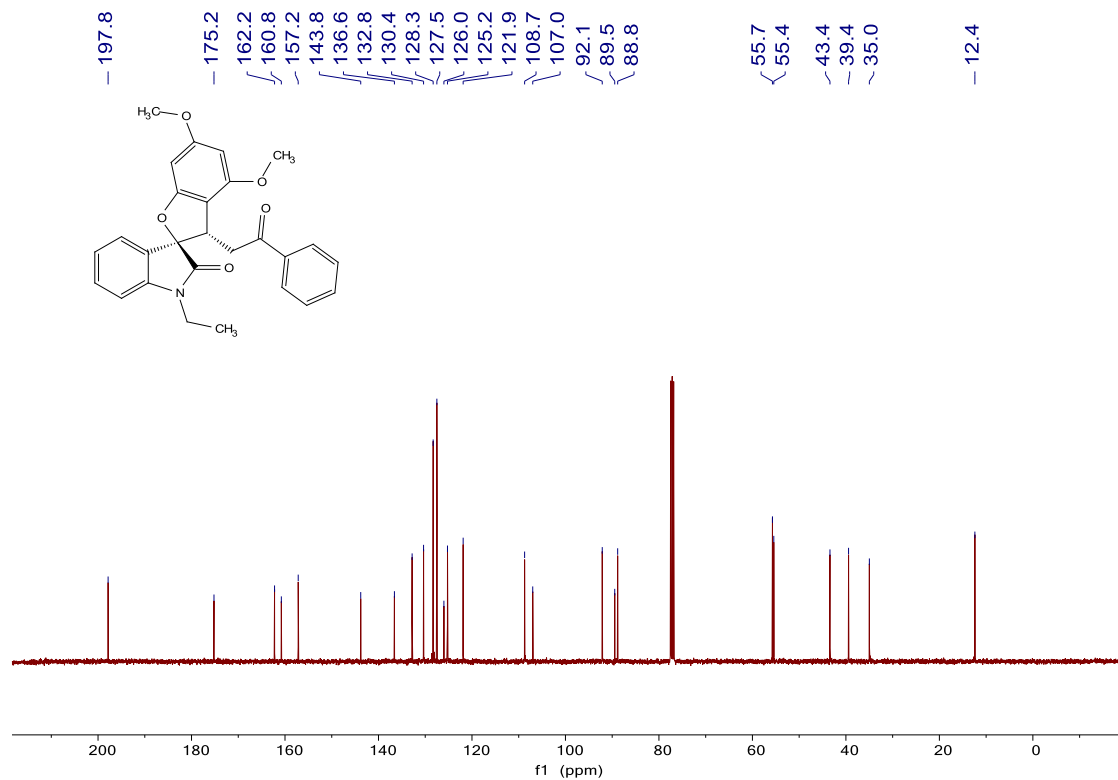

# C24

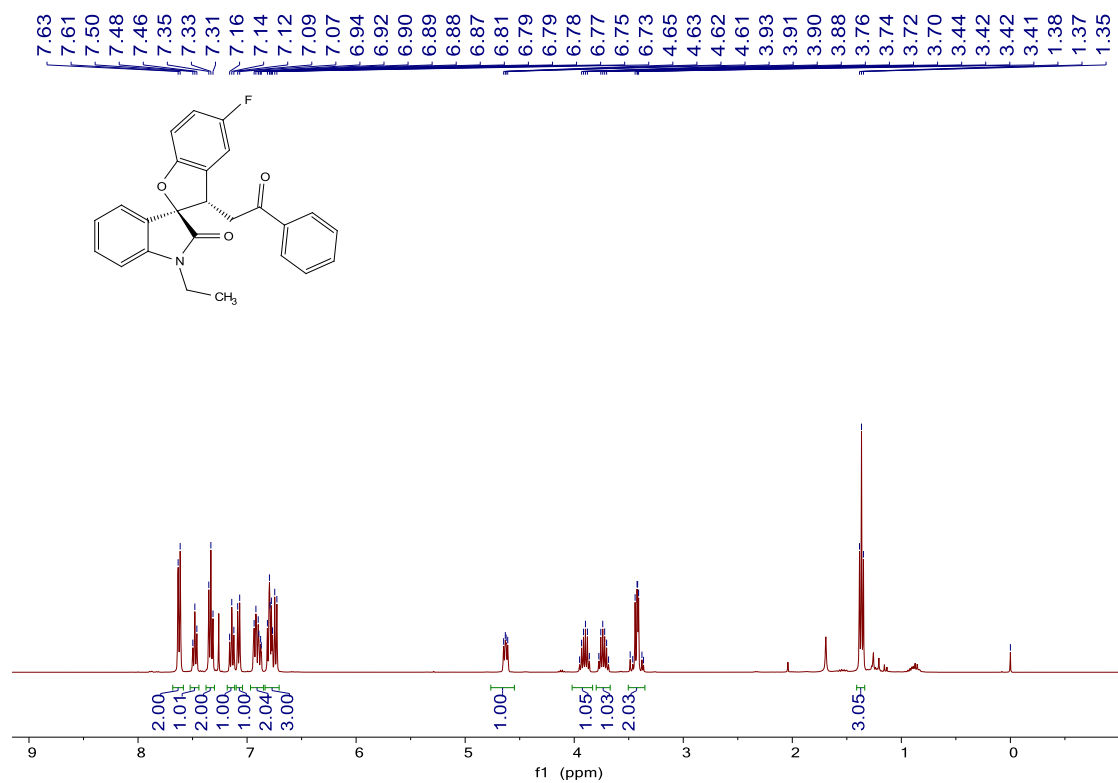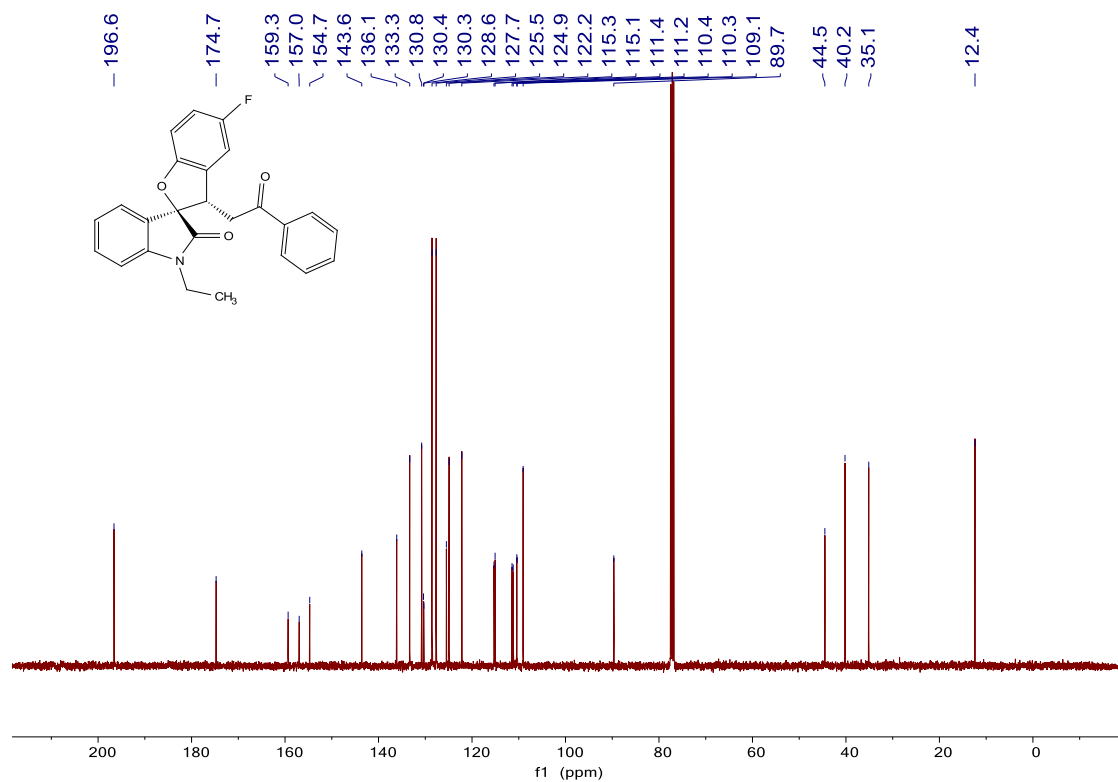

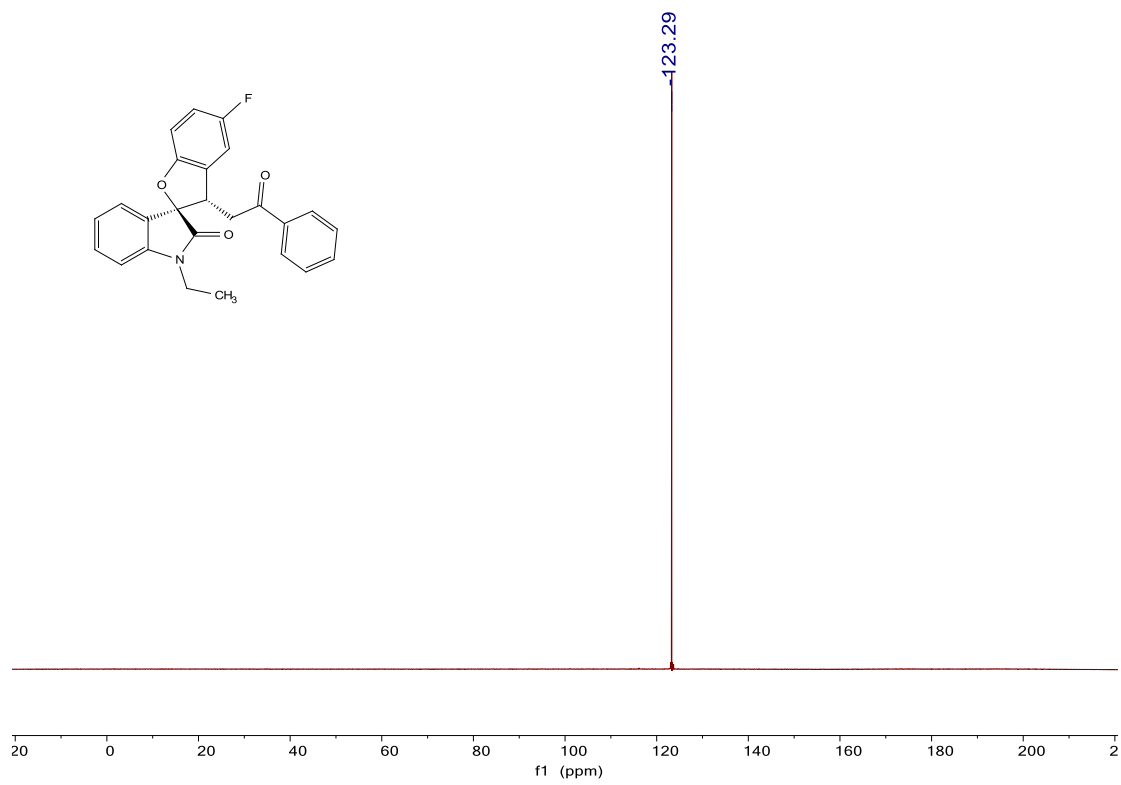

C25

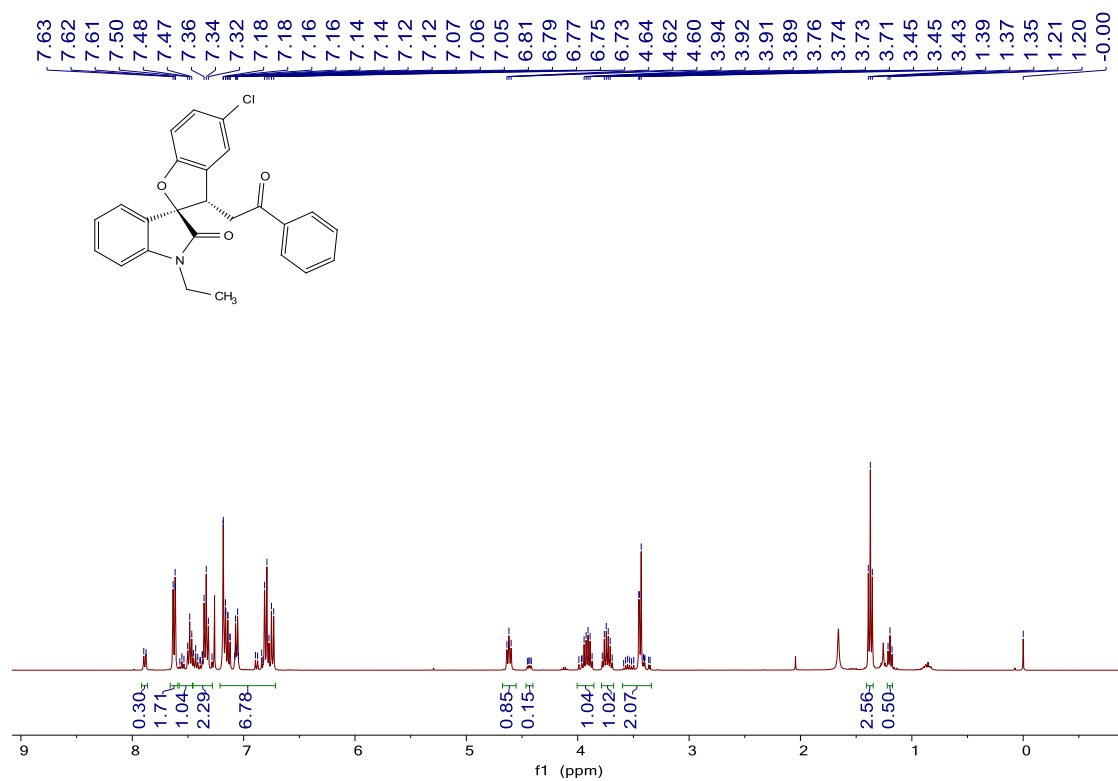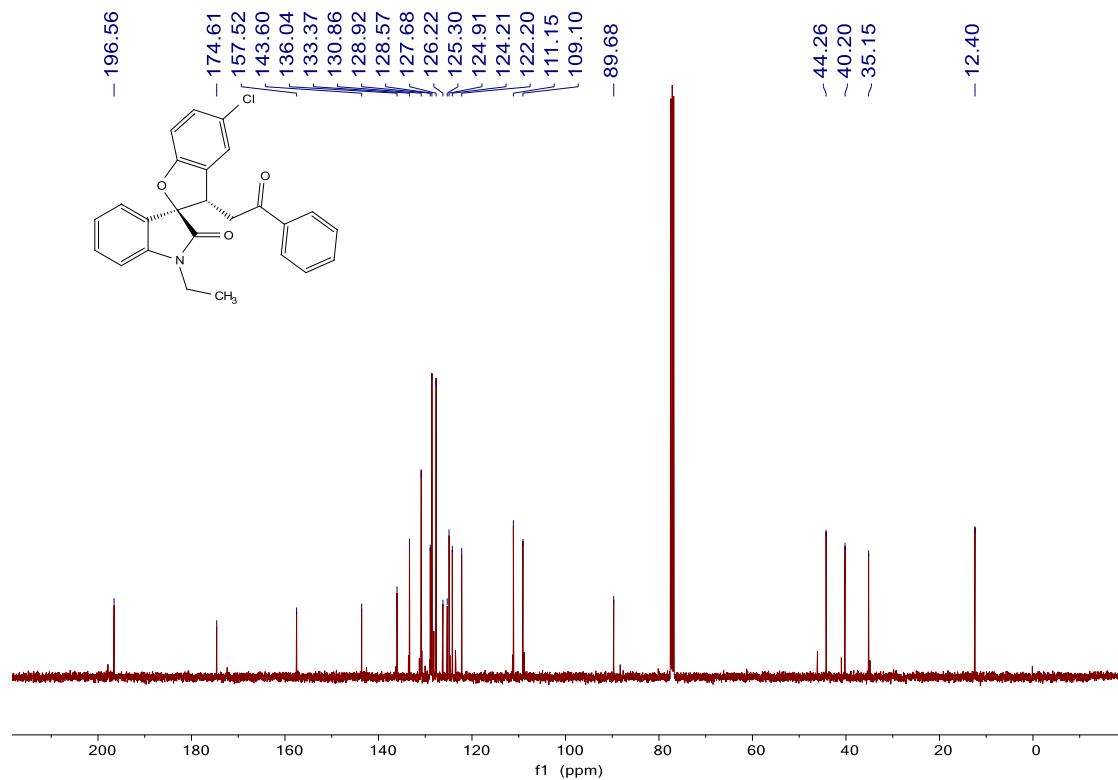

Minor diastereomer of C25

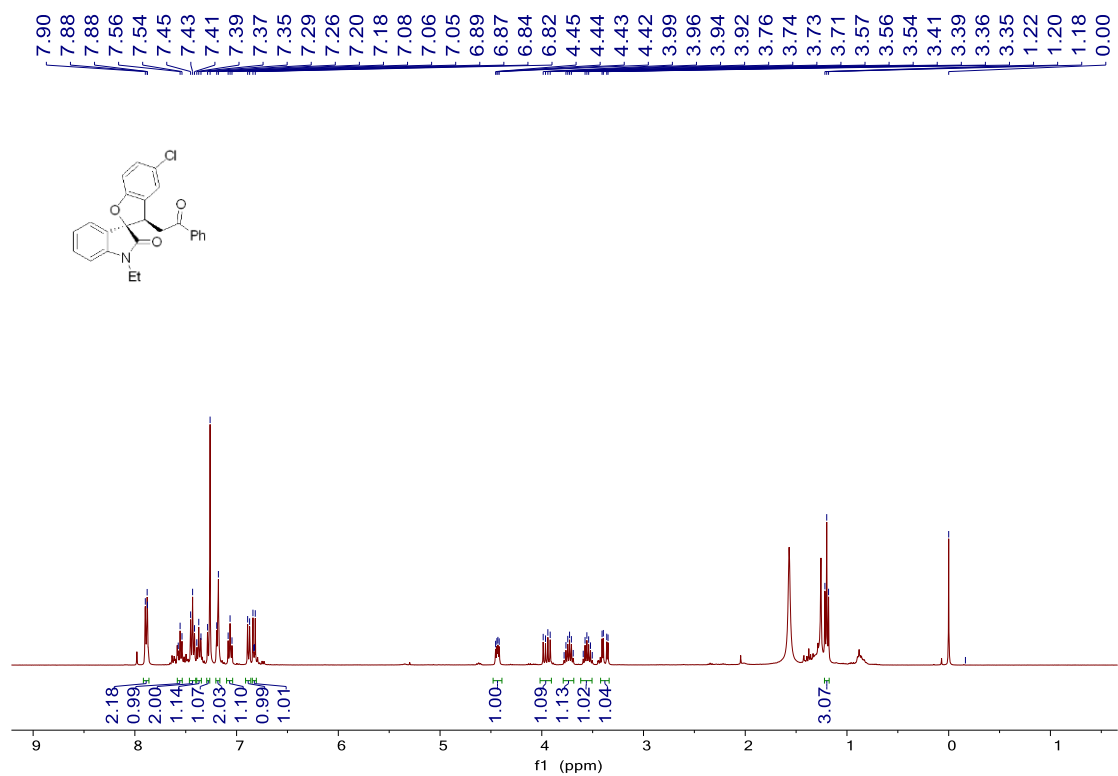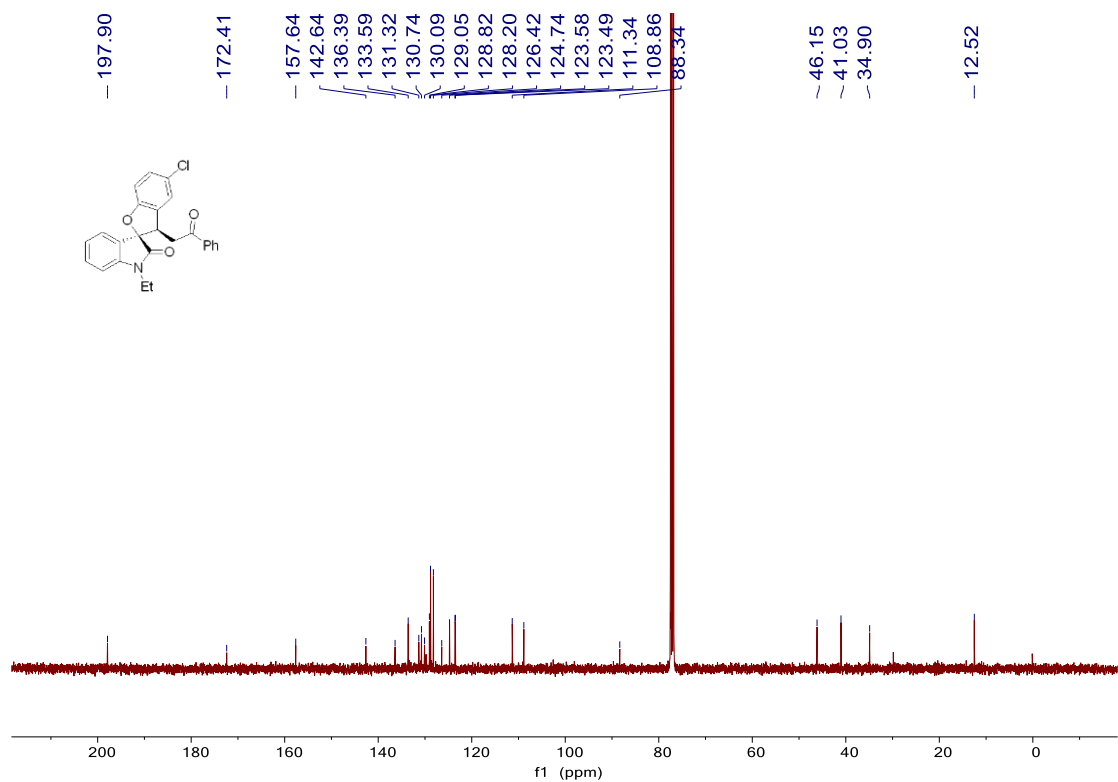



### Major diastereomer of C25

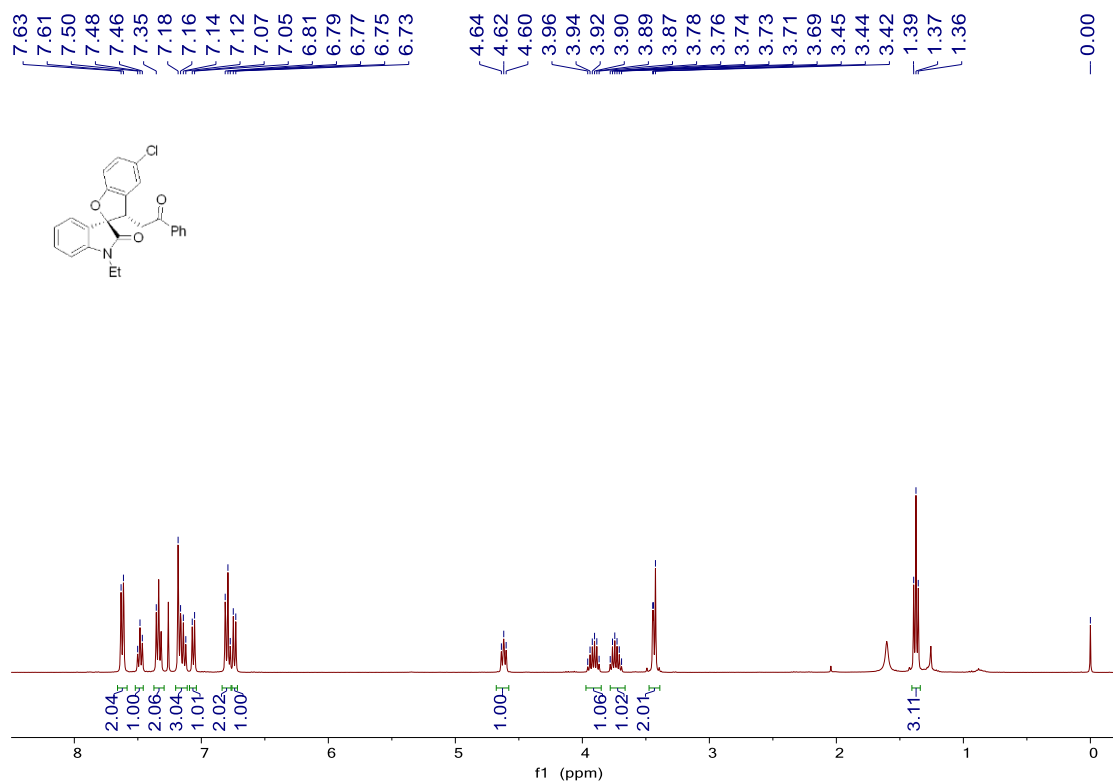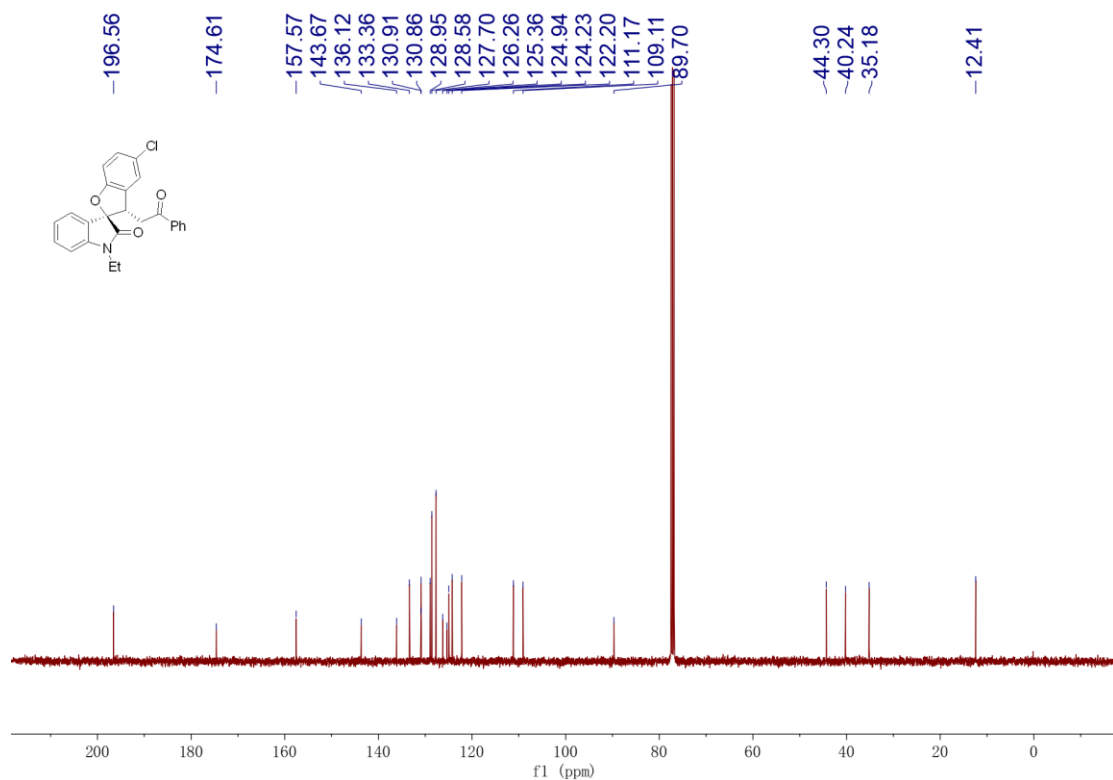

C26

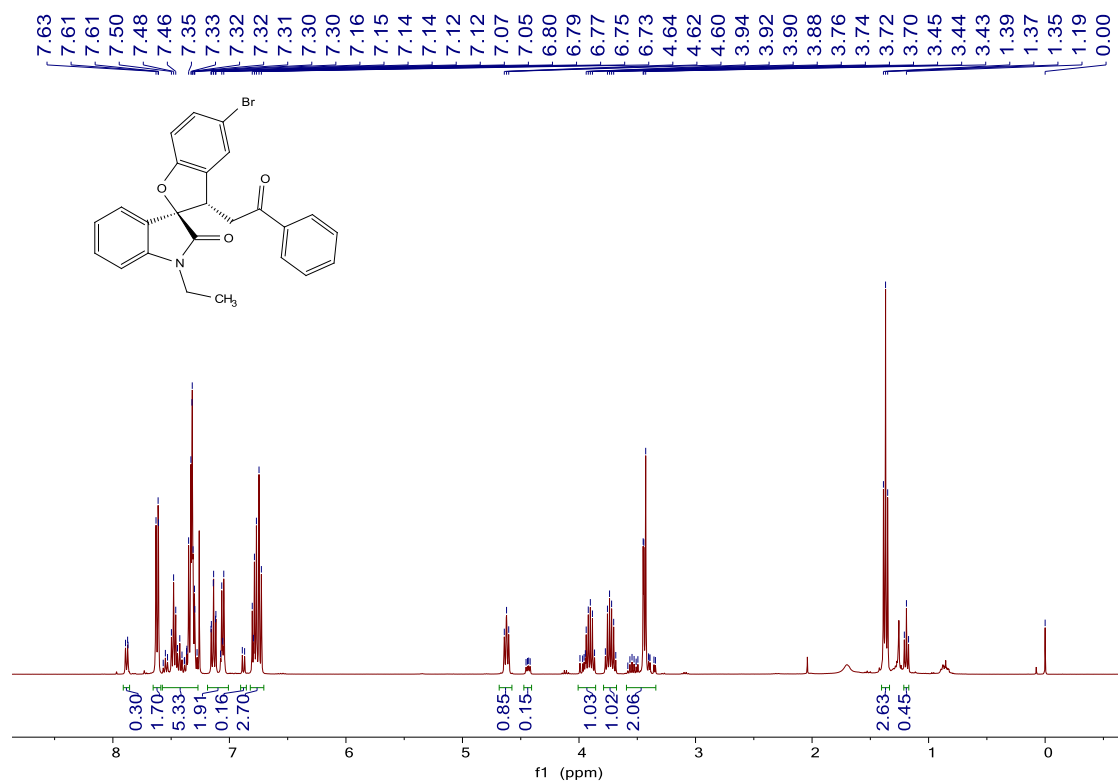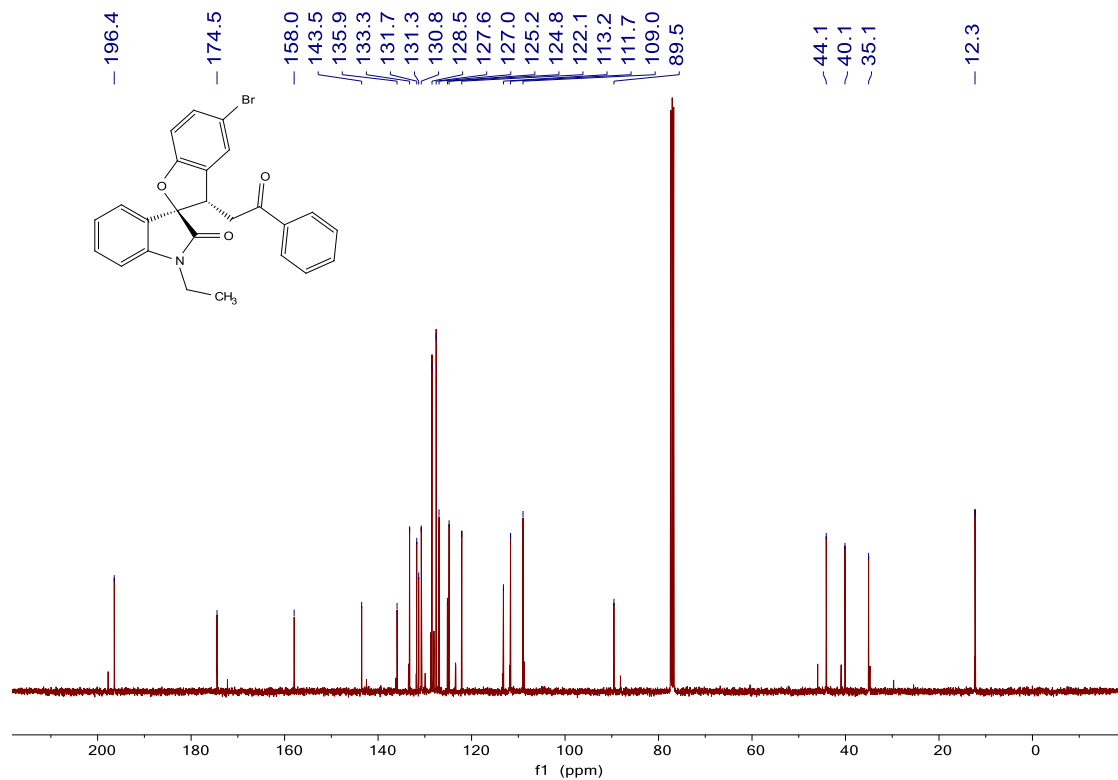

Minor diastereomer of C26

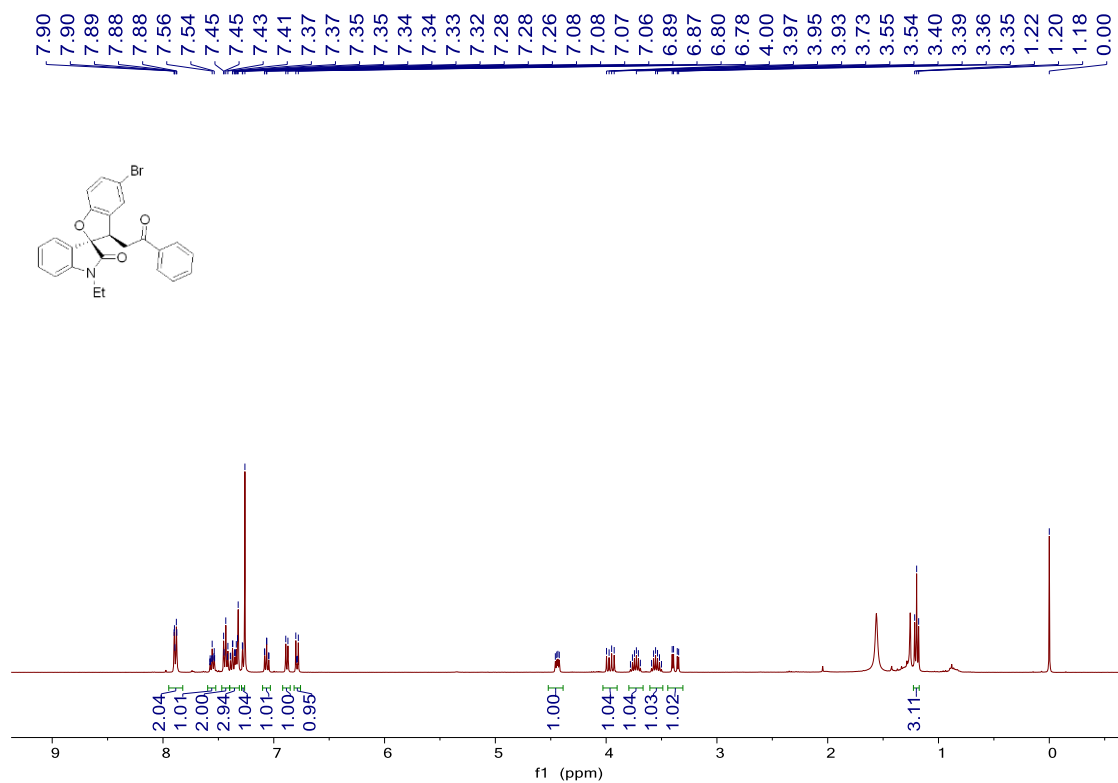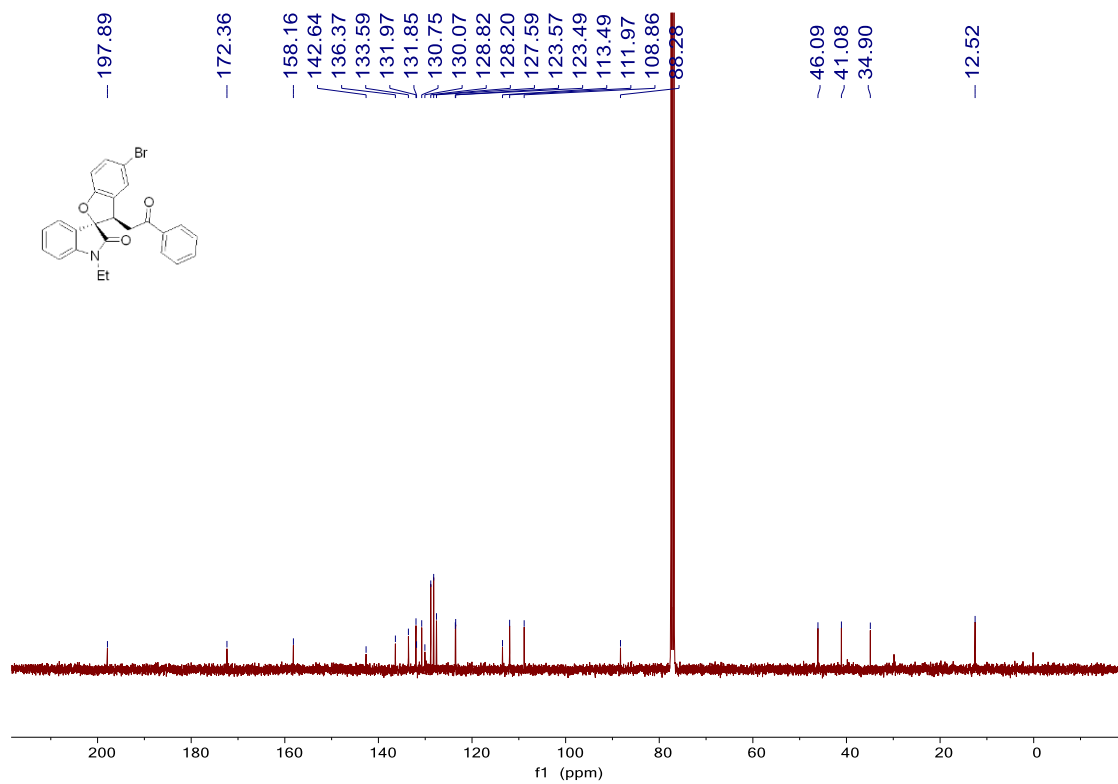

### Major diastereomer of C26

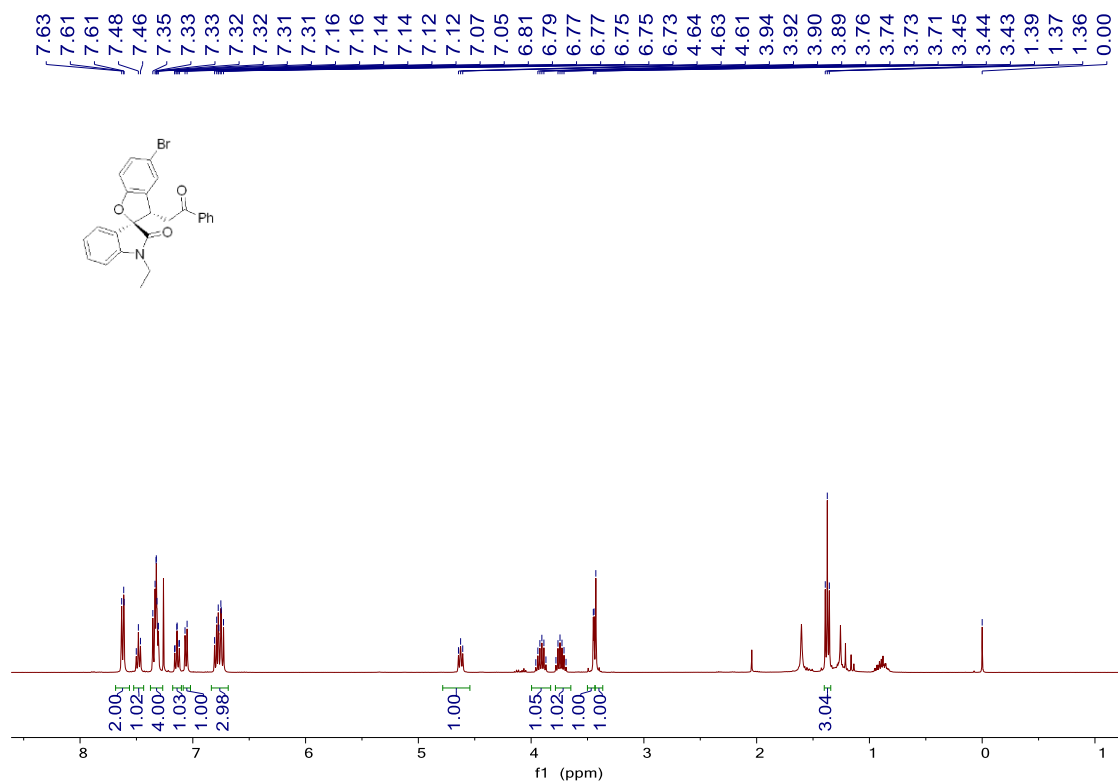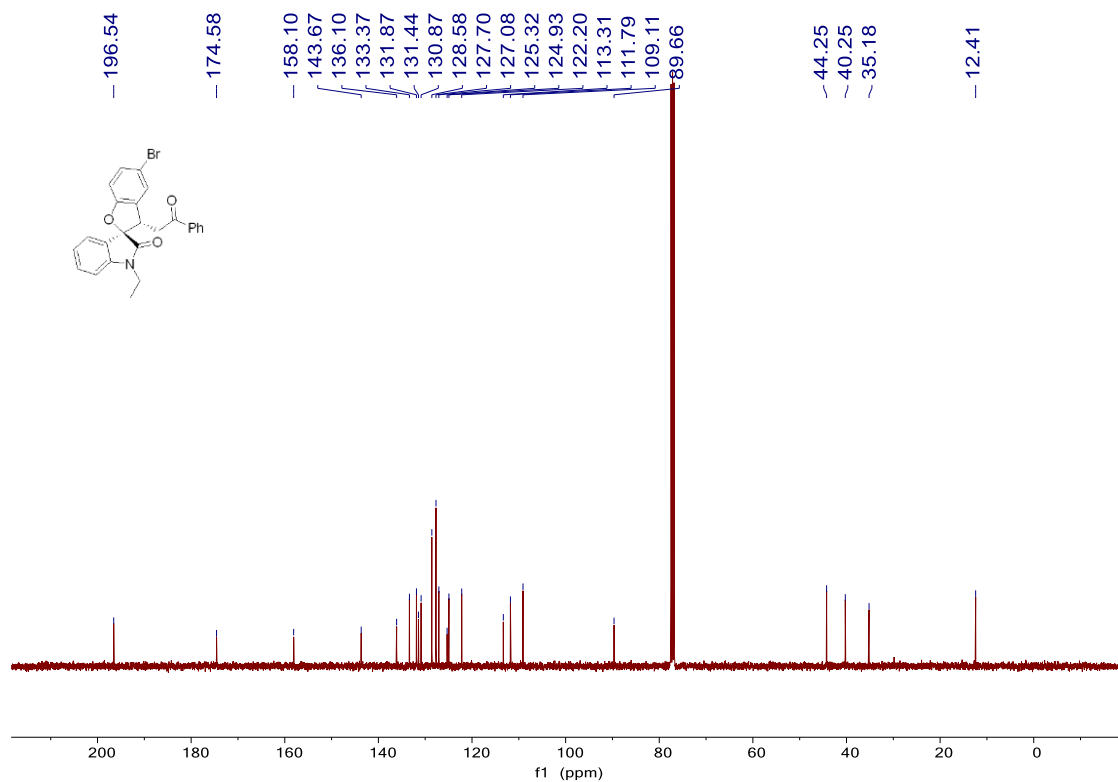

C27

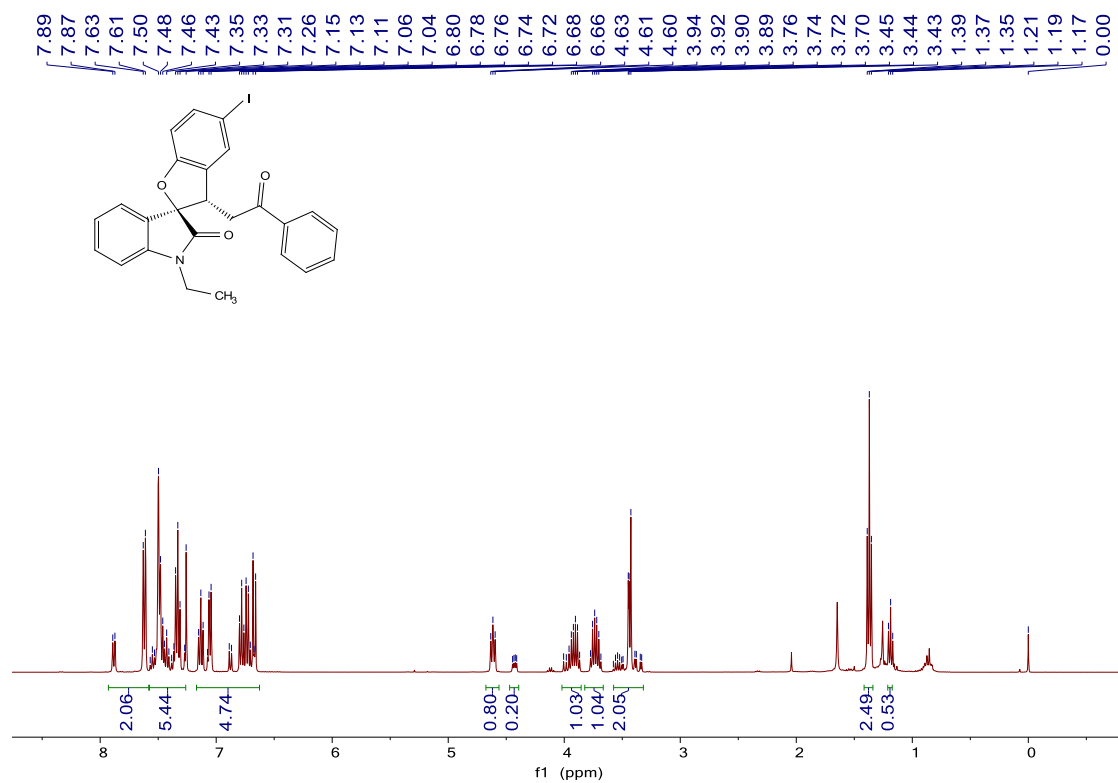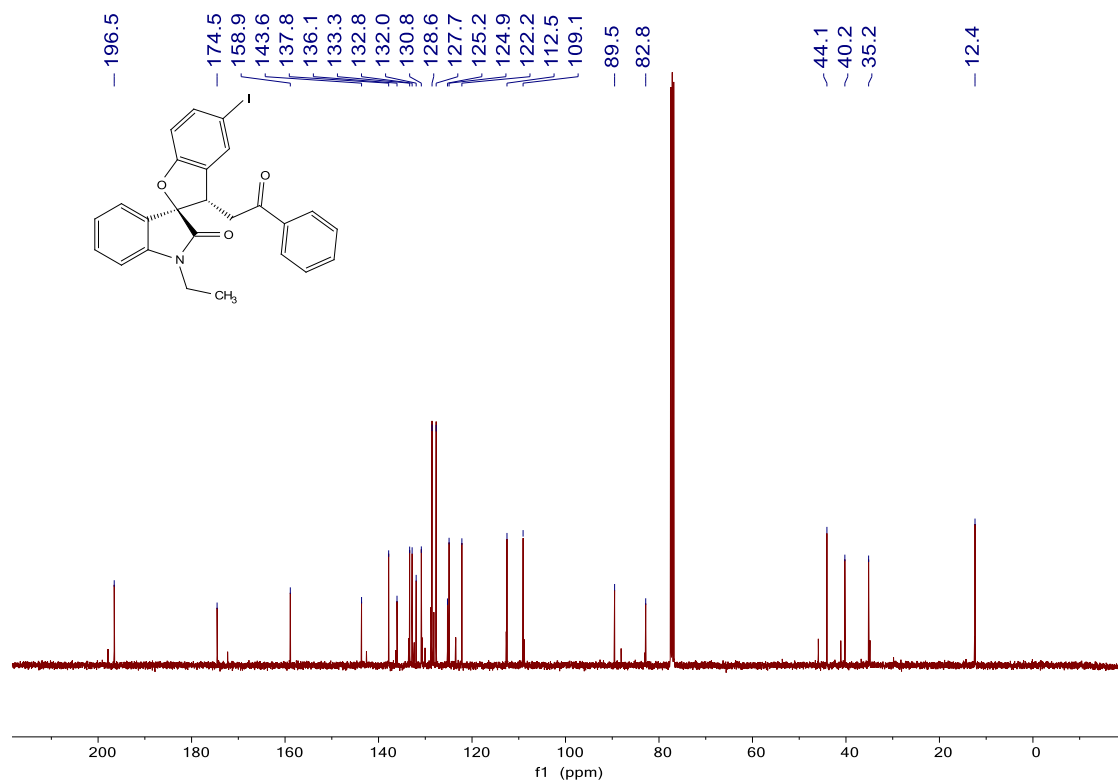

### Minor diastereomer of C27

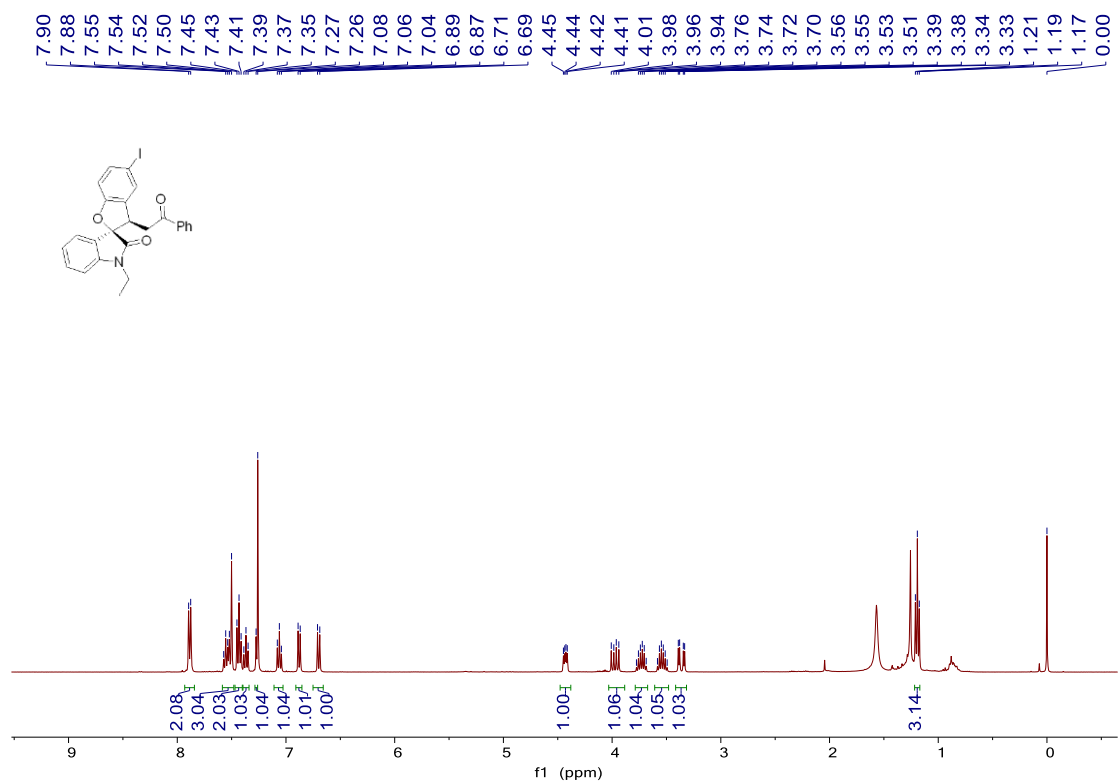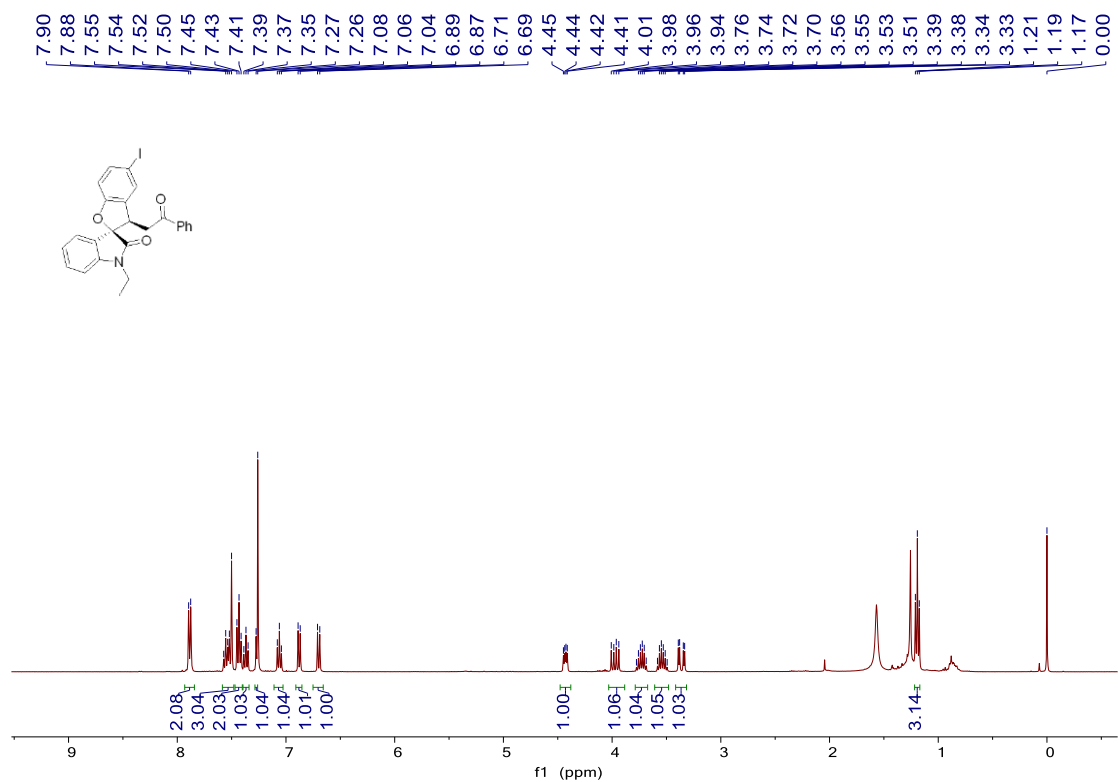

### Major diastereomer of C27

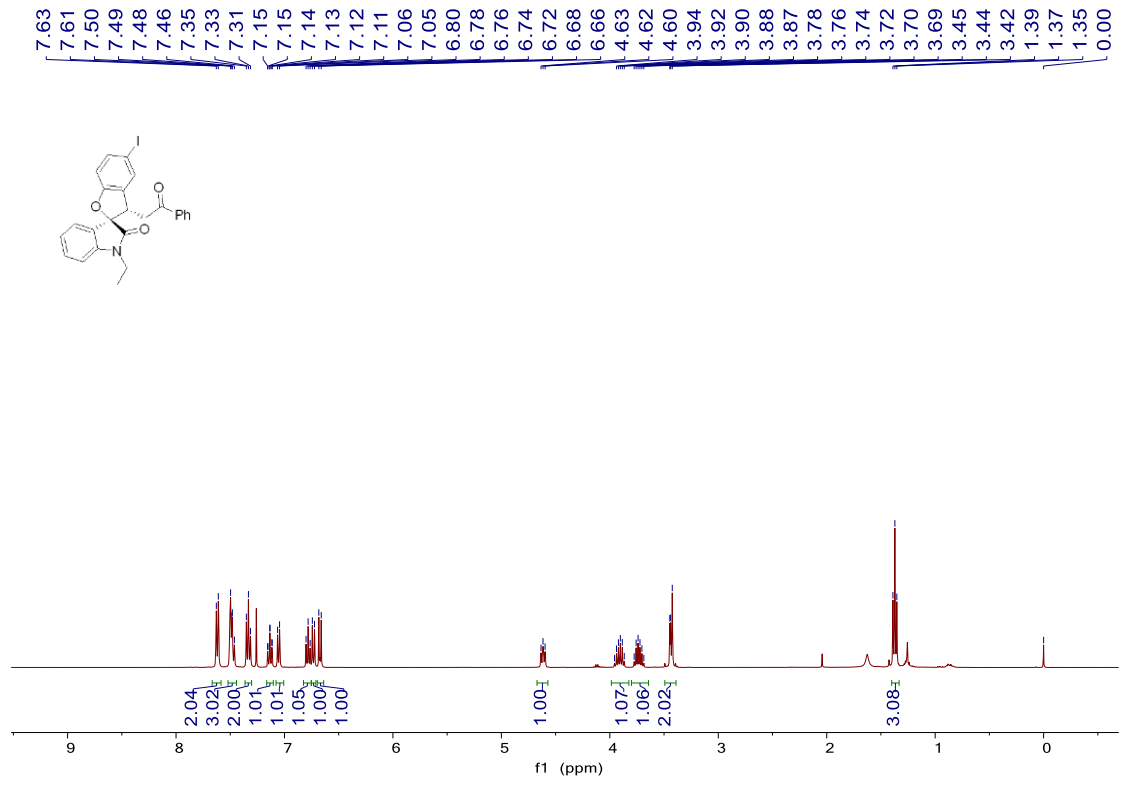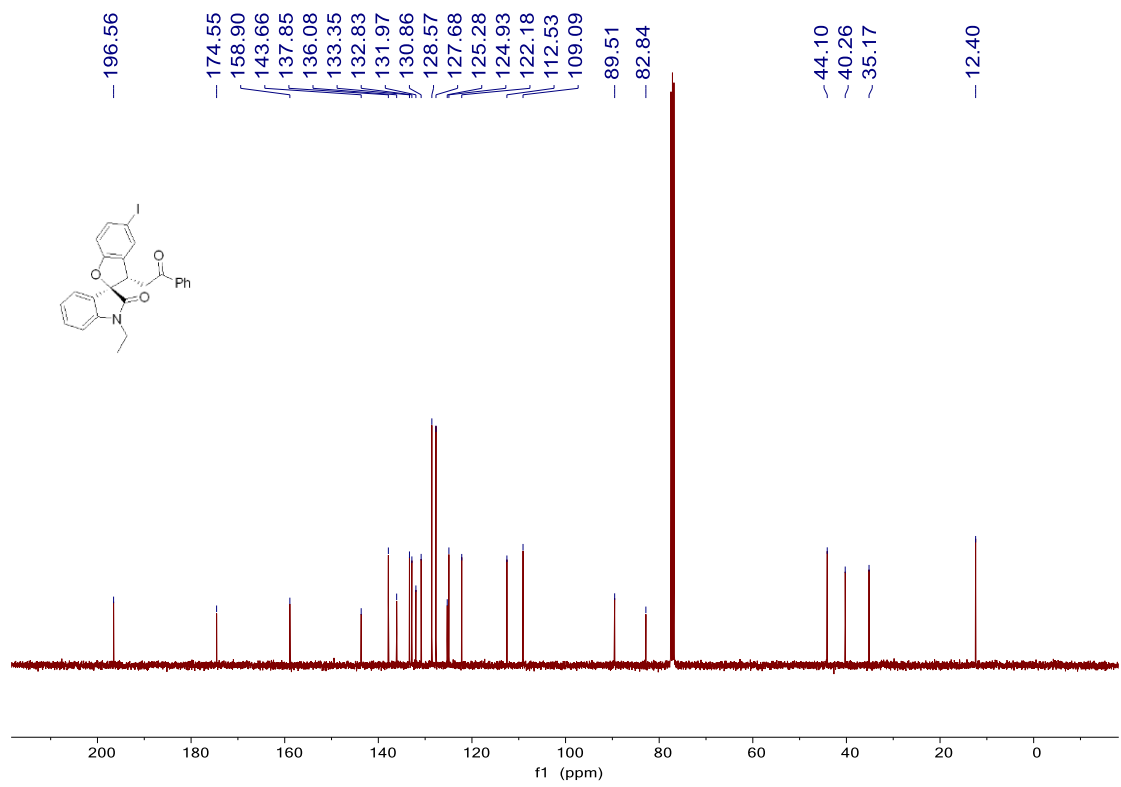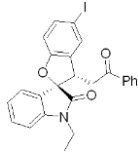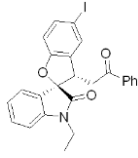

**C28**

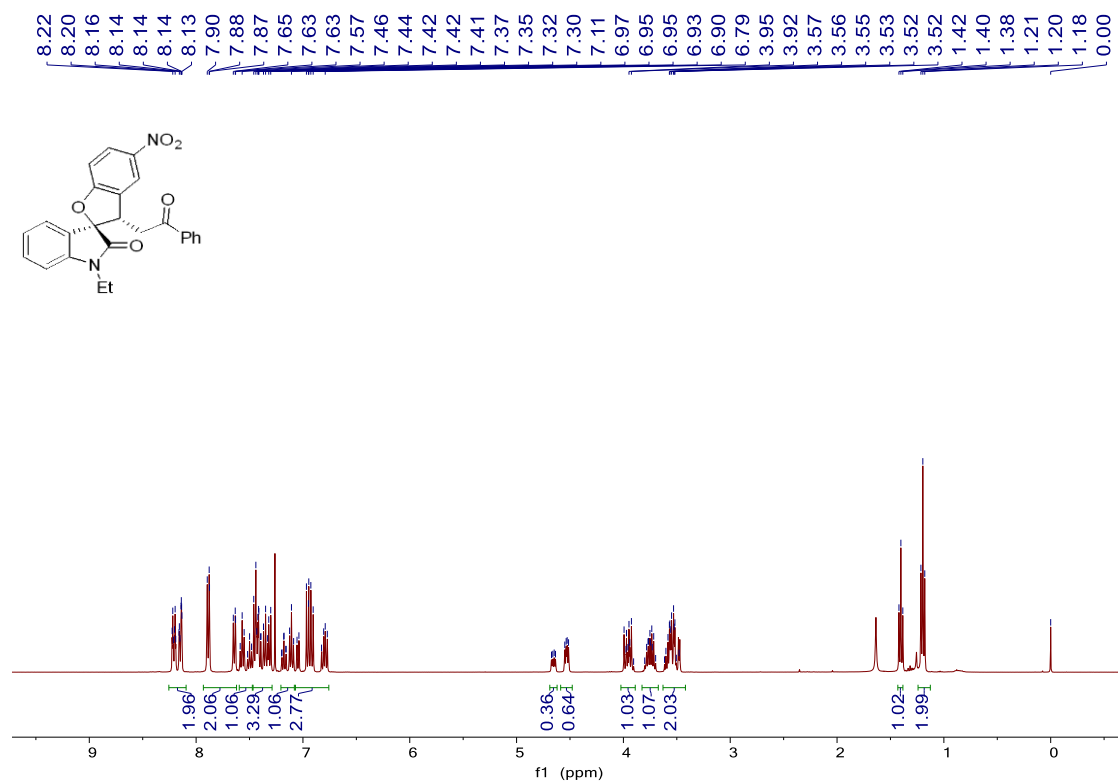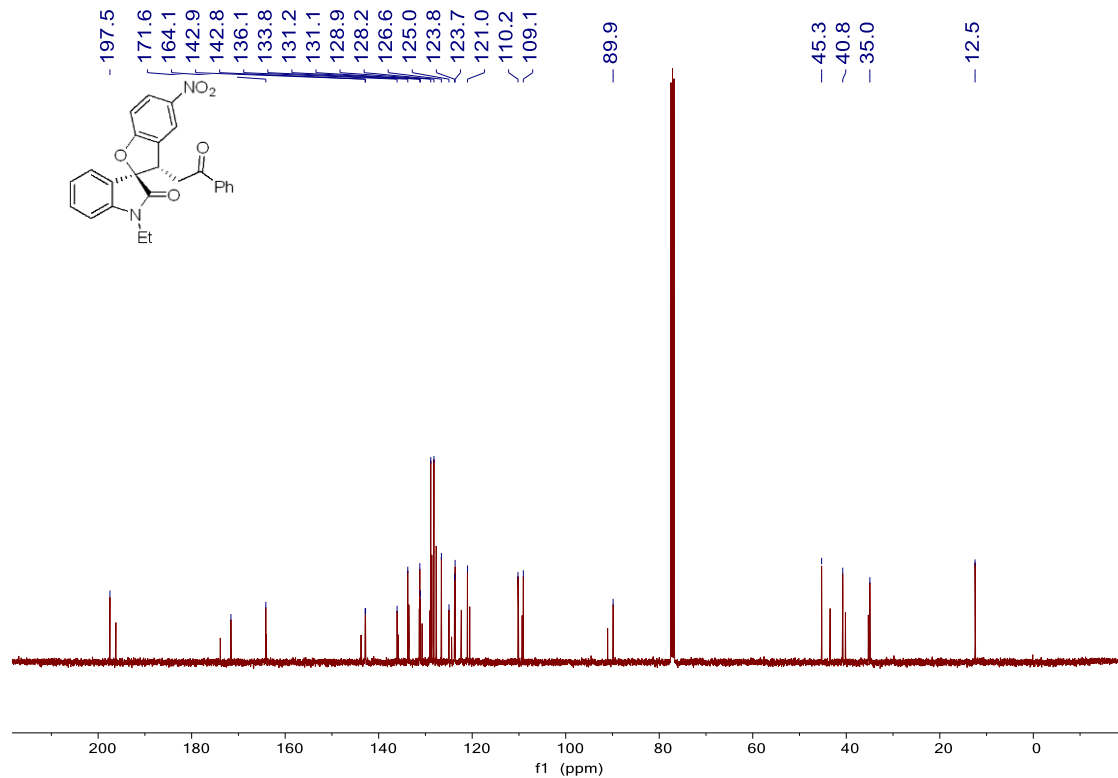



### Minor diastereomer of C28

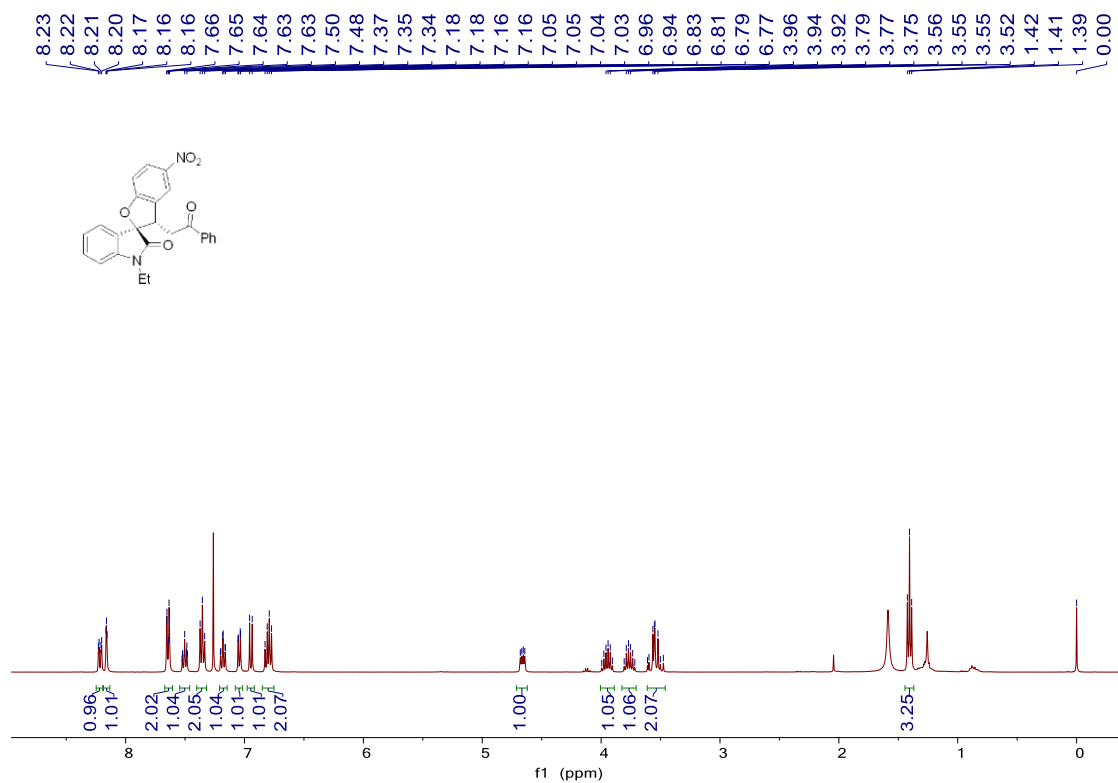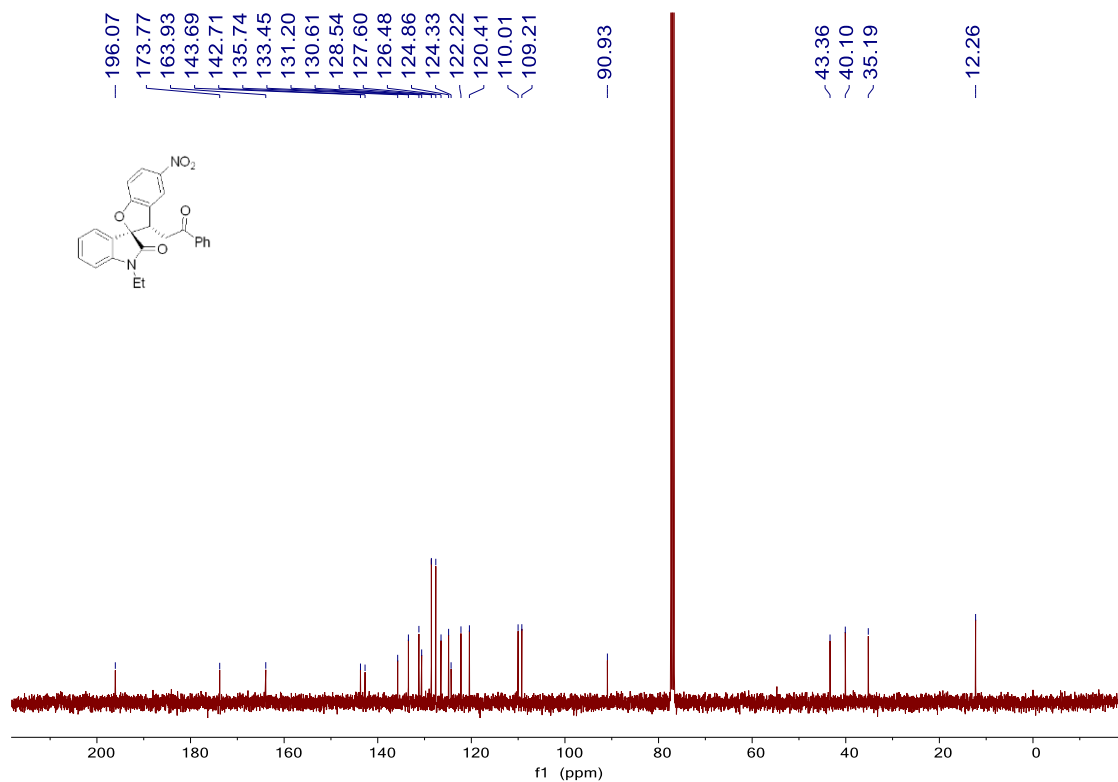

### Major diastereomer of C28

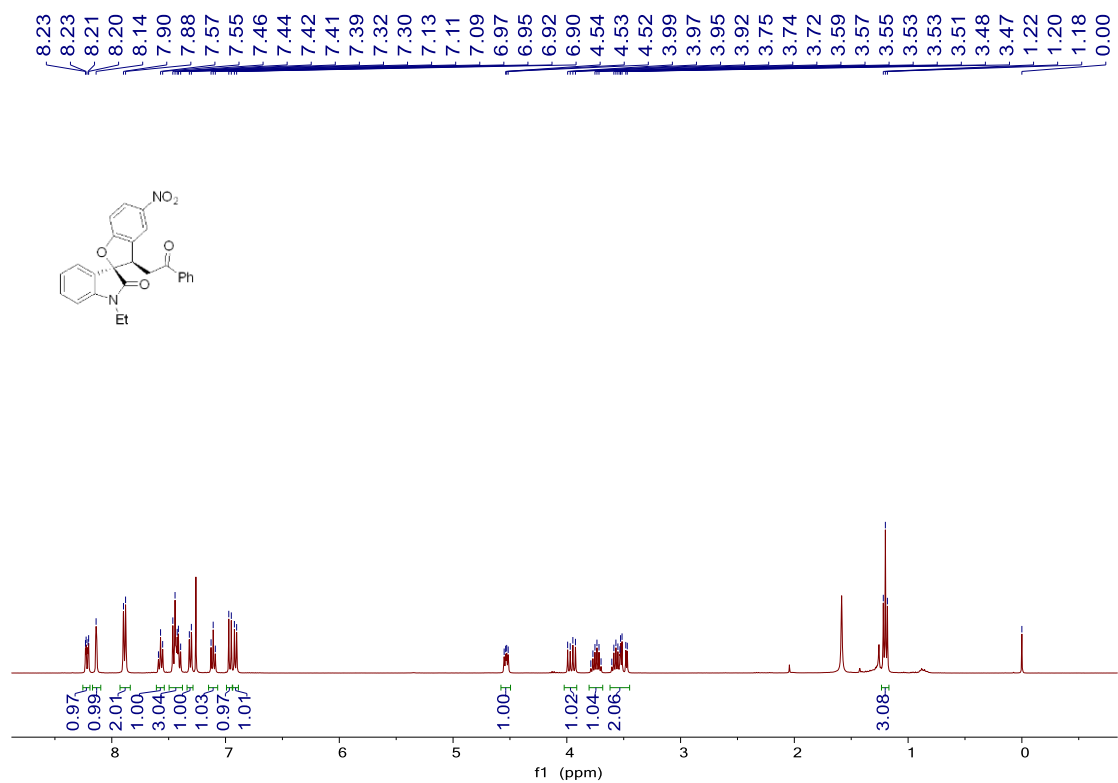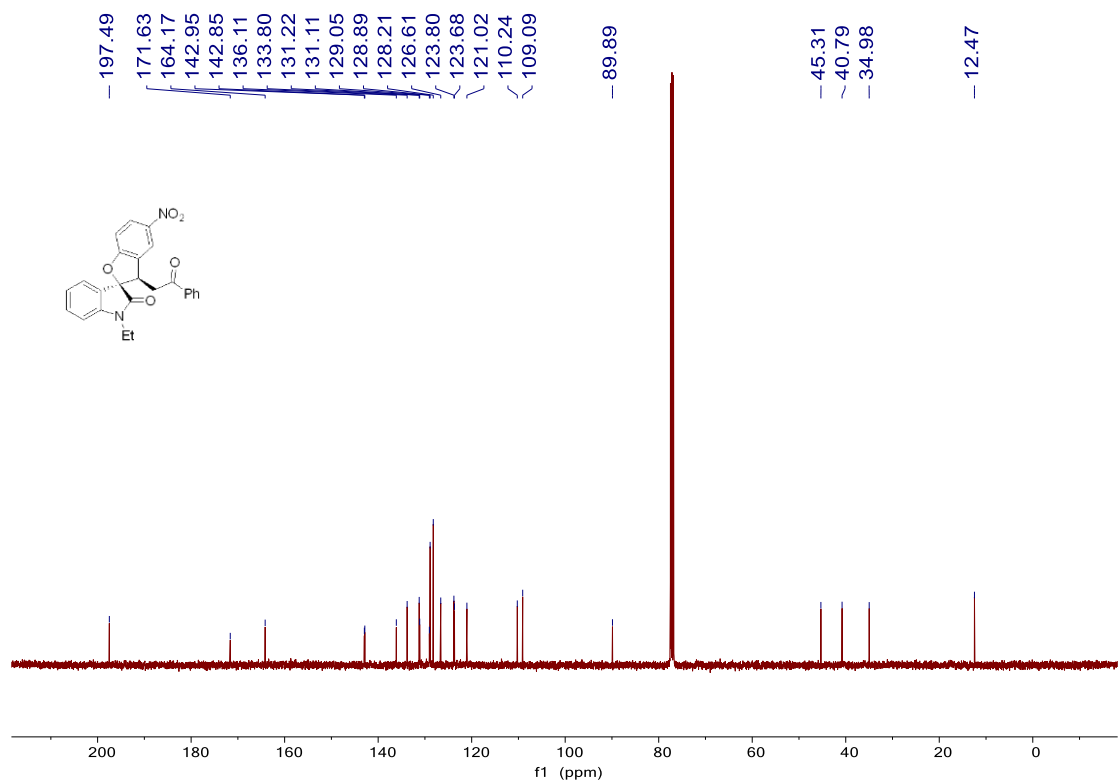

**C29**

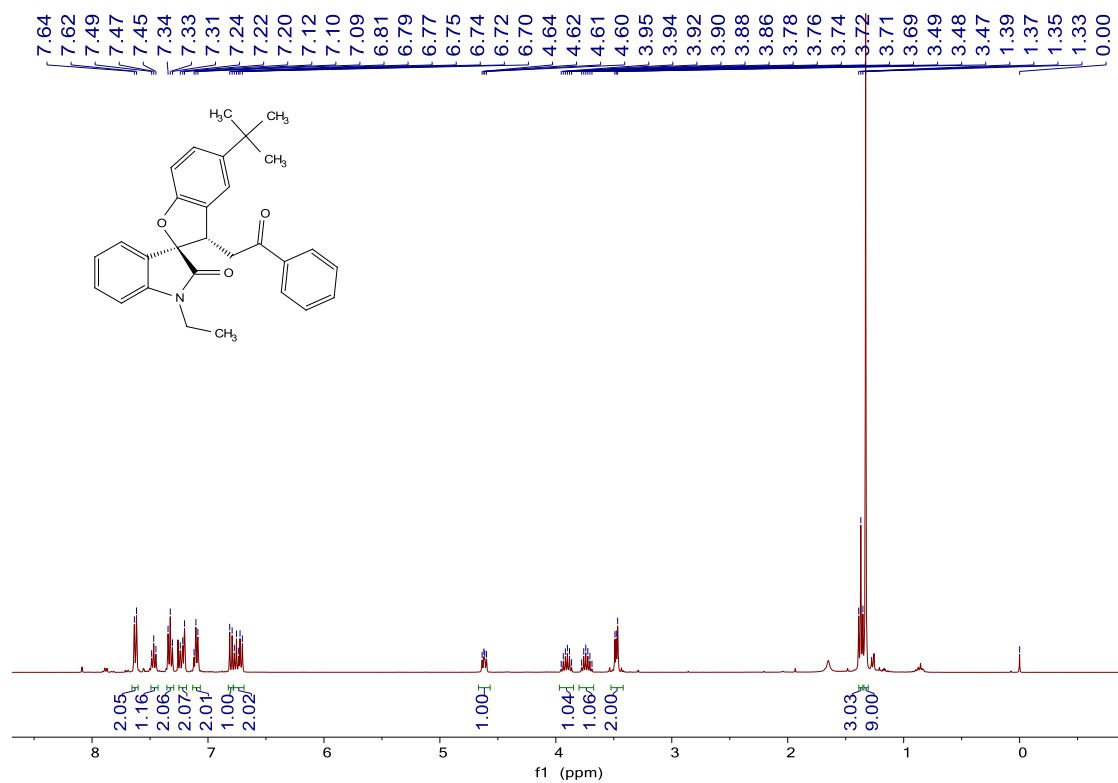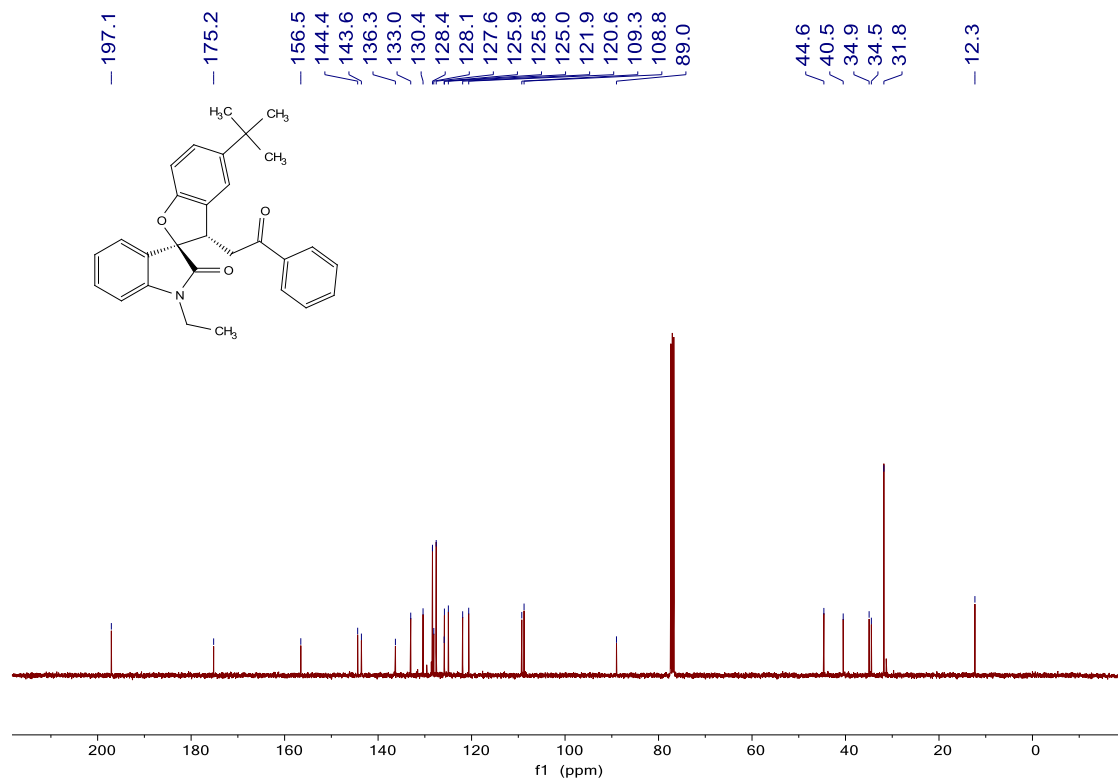

**C30**

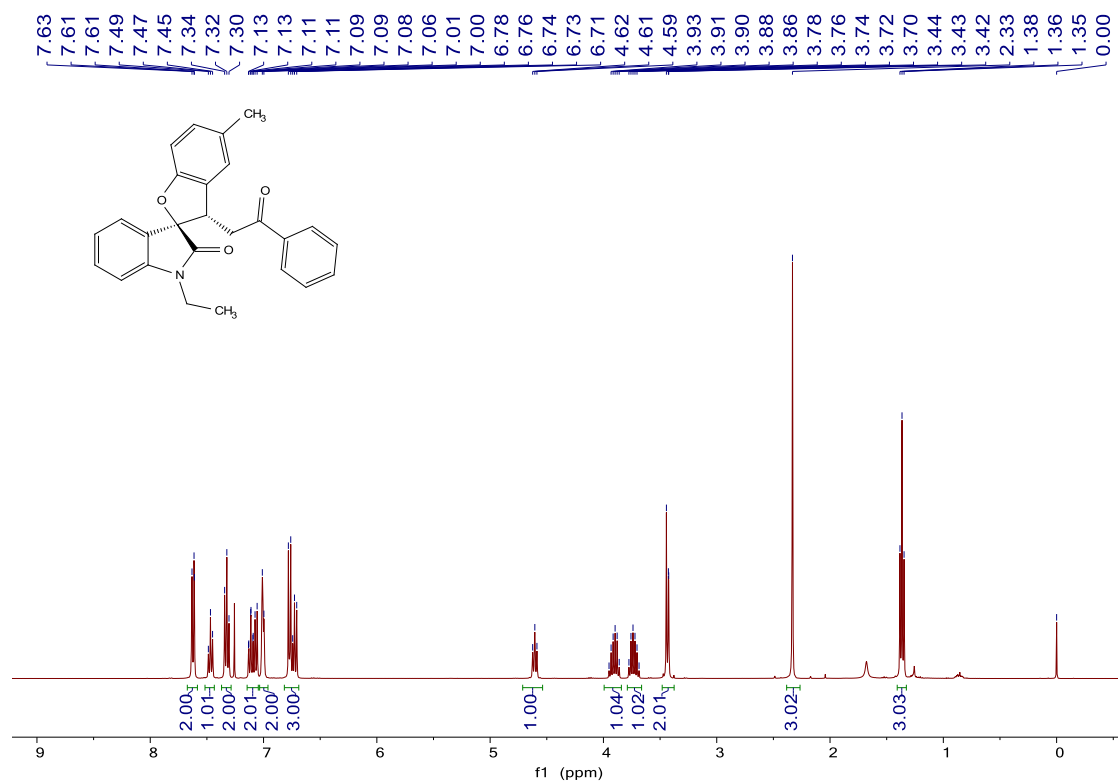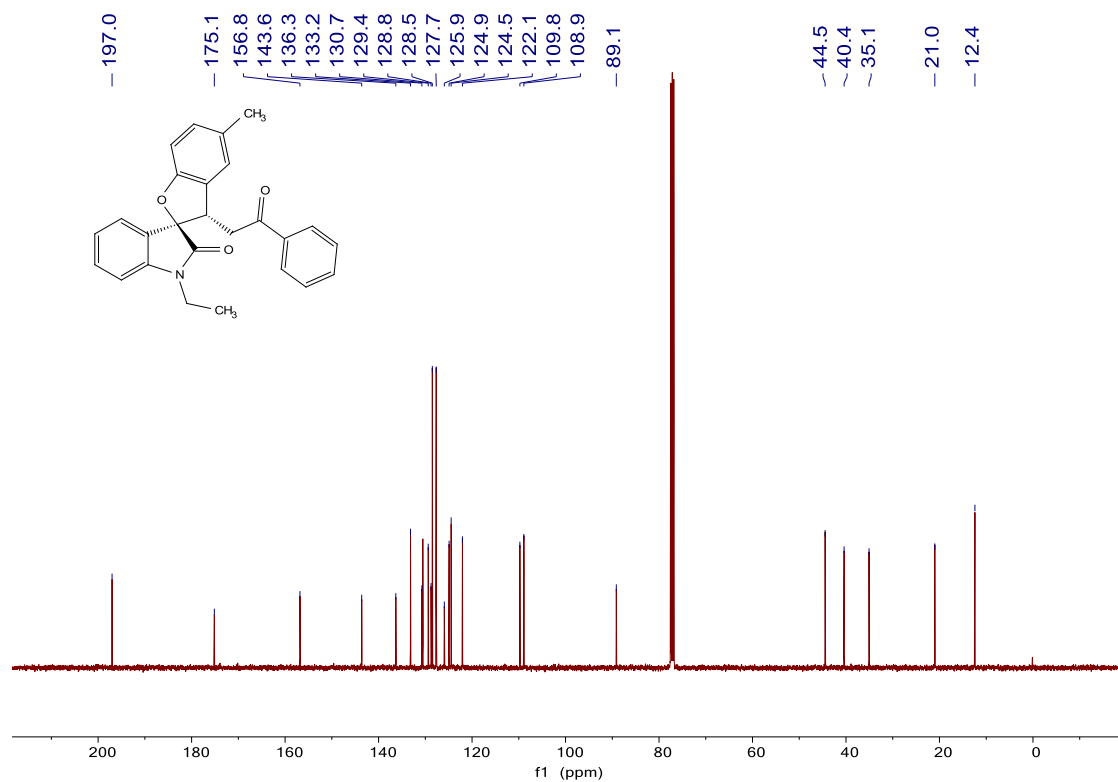

# C31

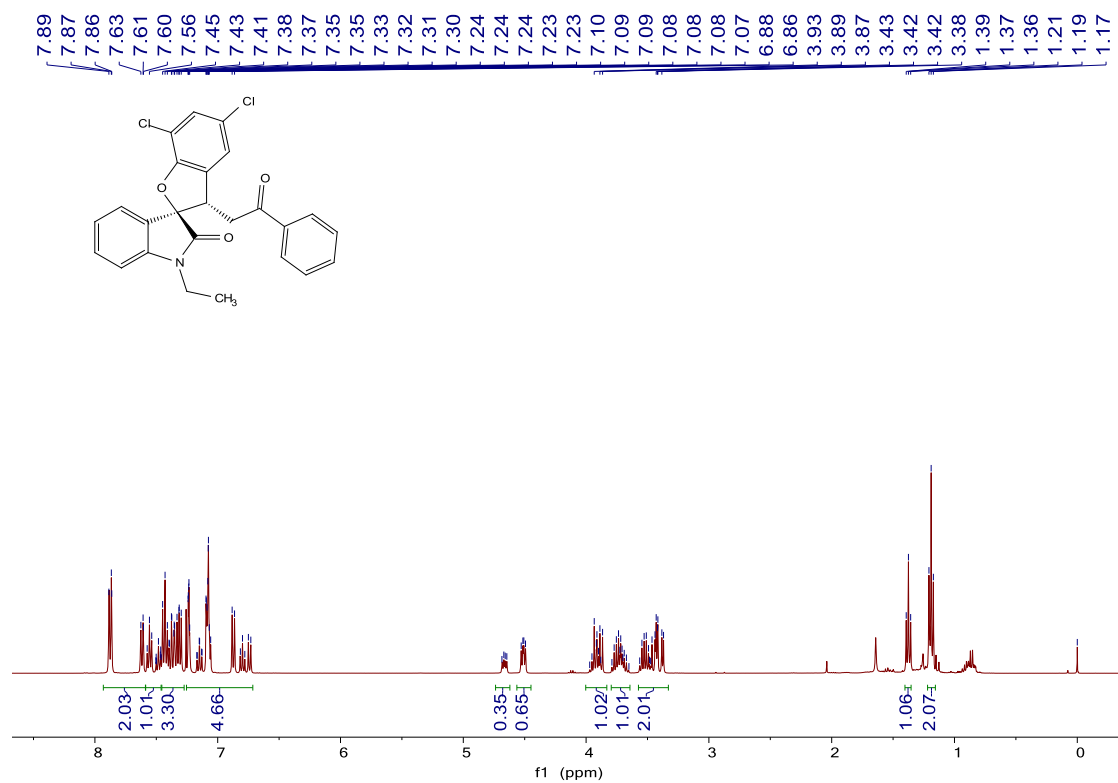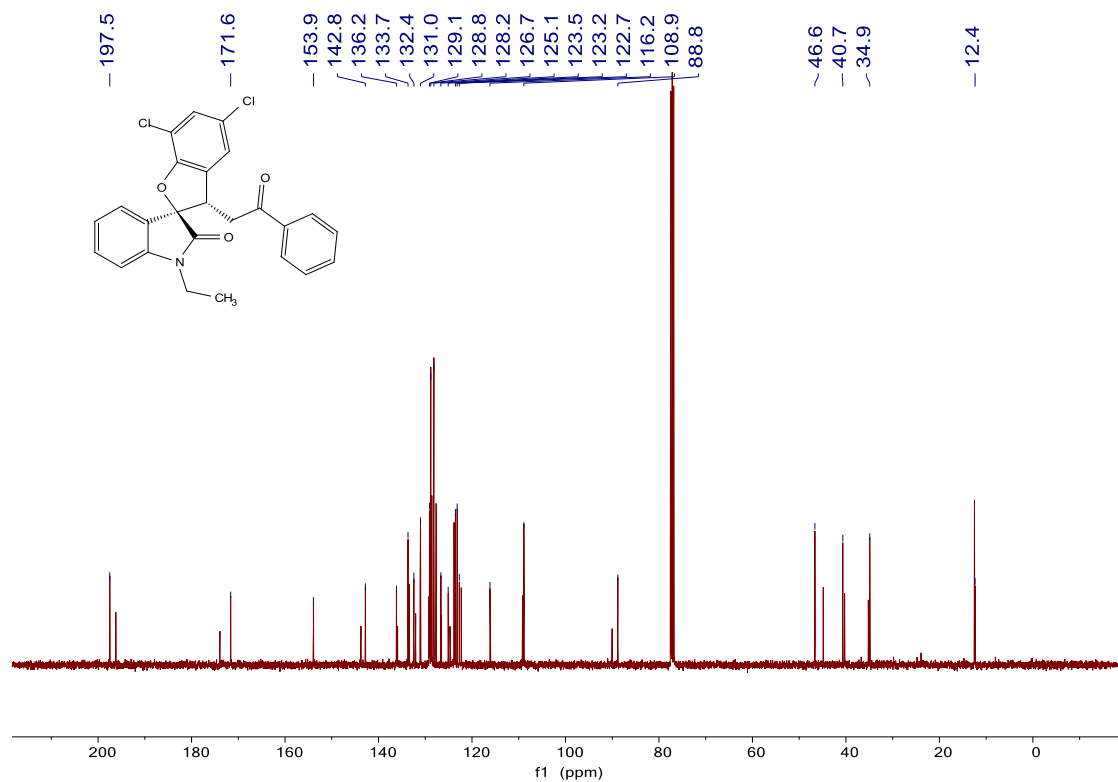

### Minor diastereomer of C31

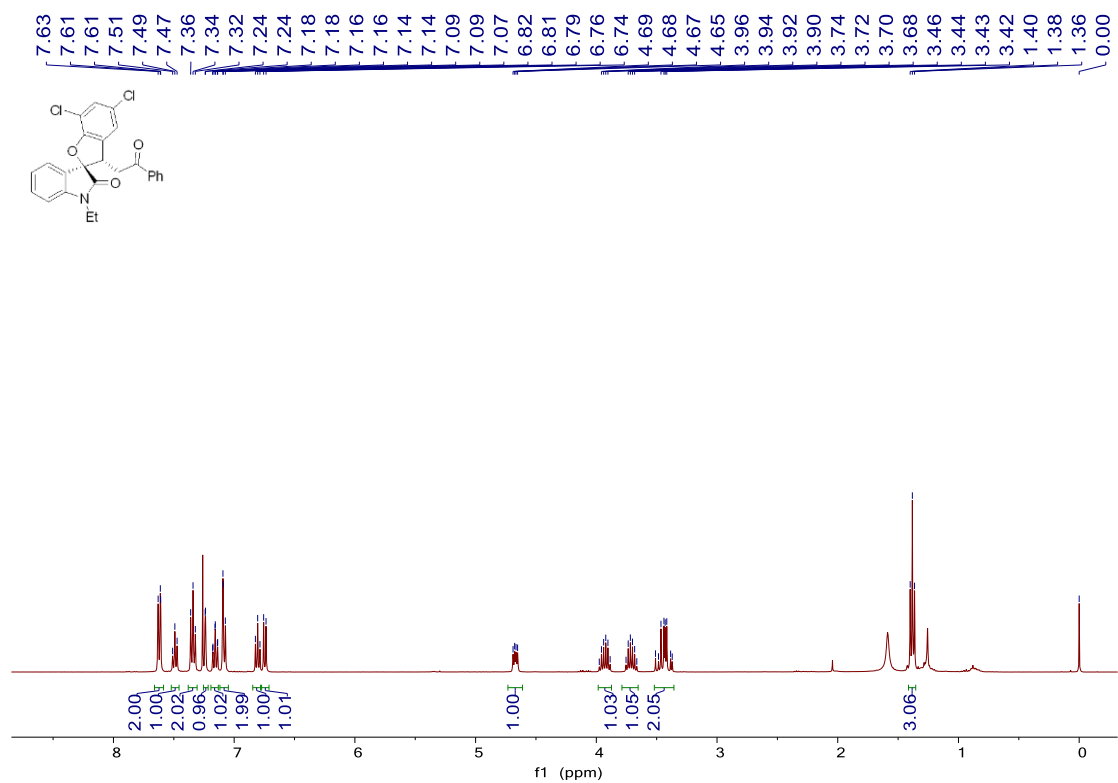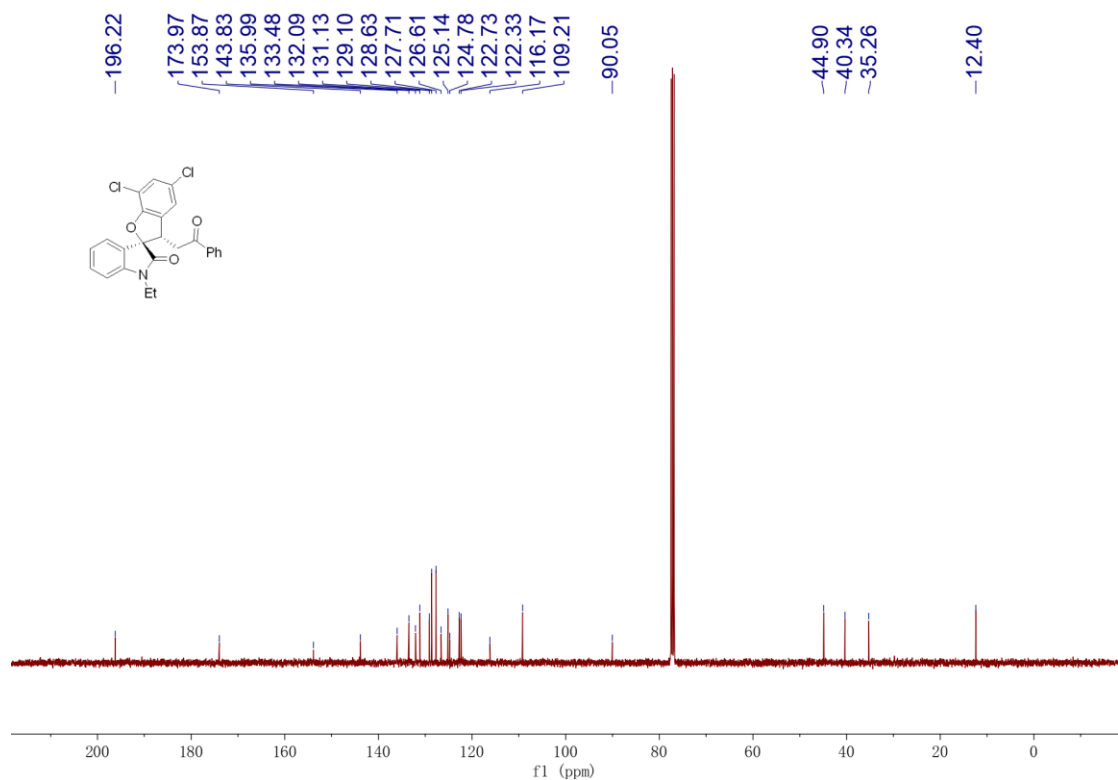

### Major diastereomer of C31

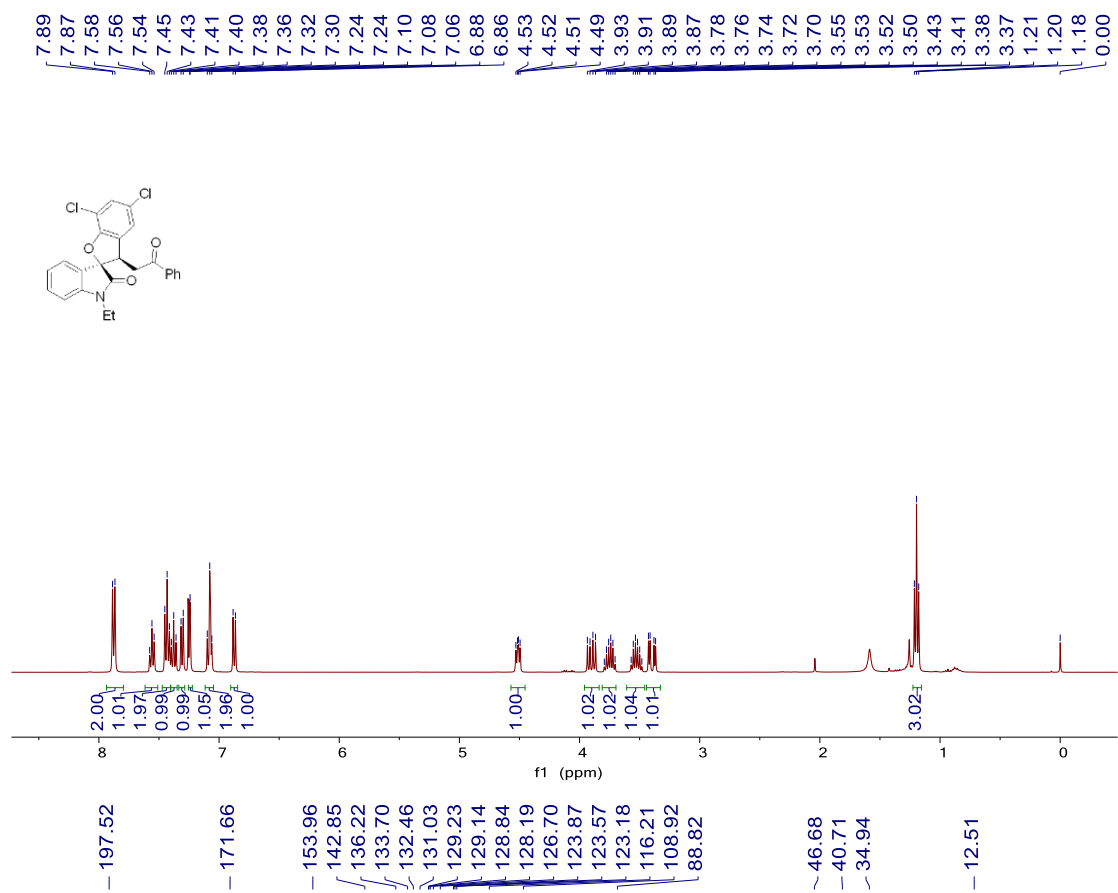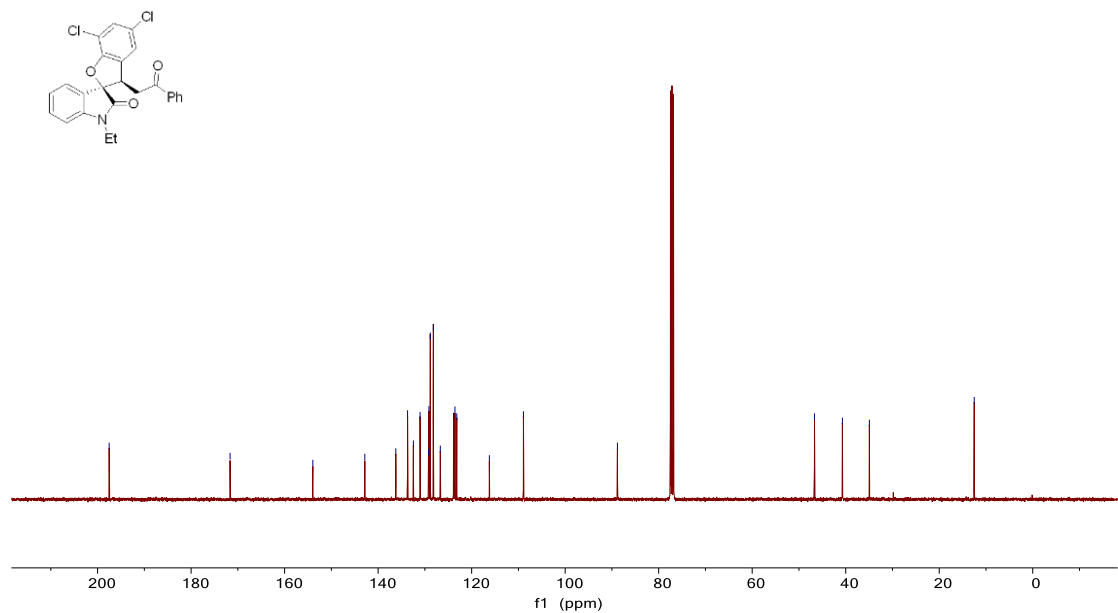

C32

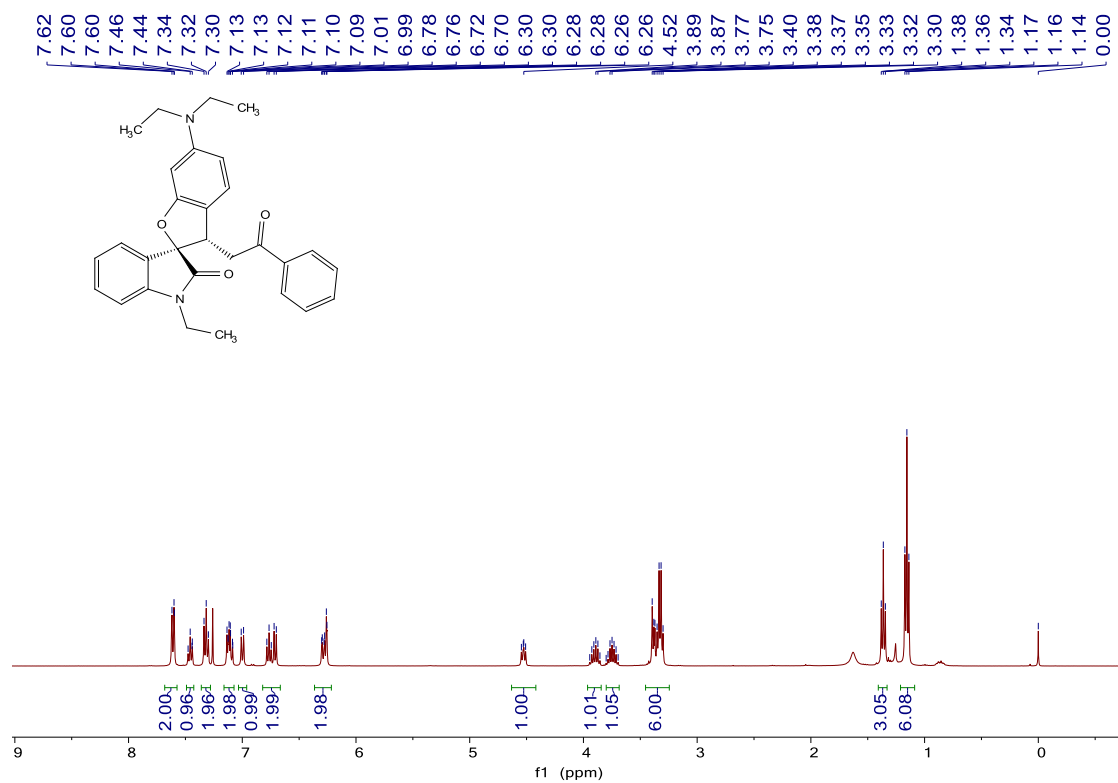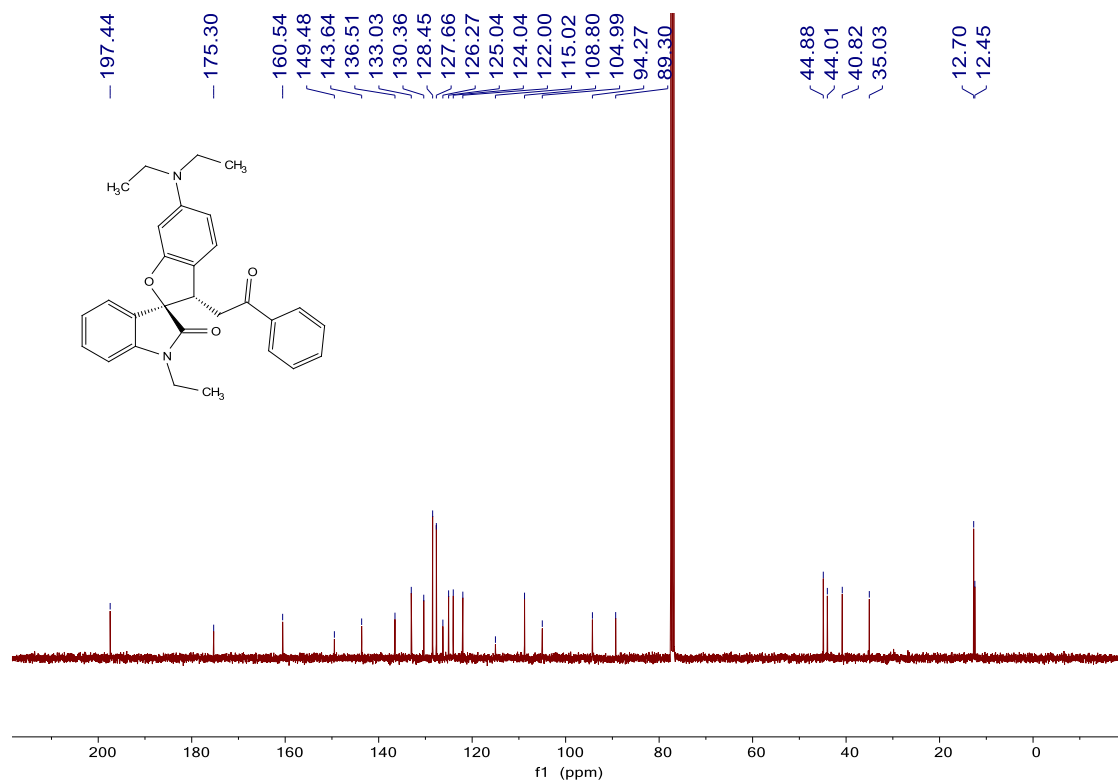



C33

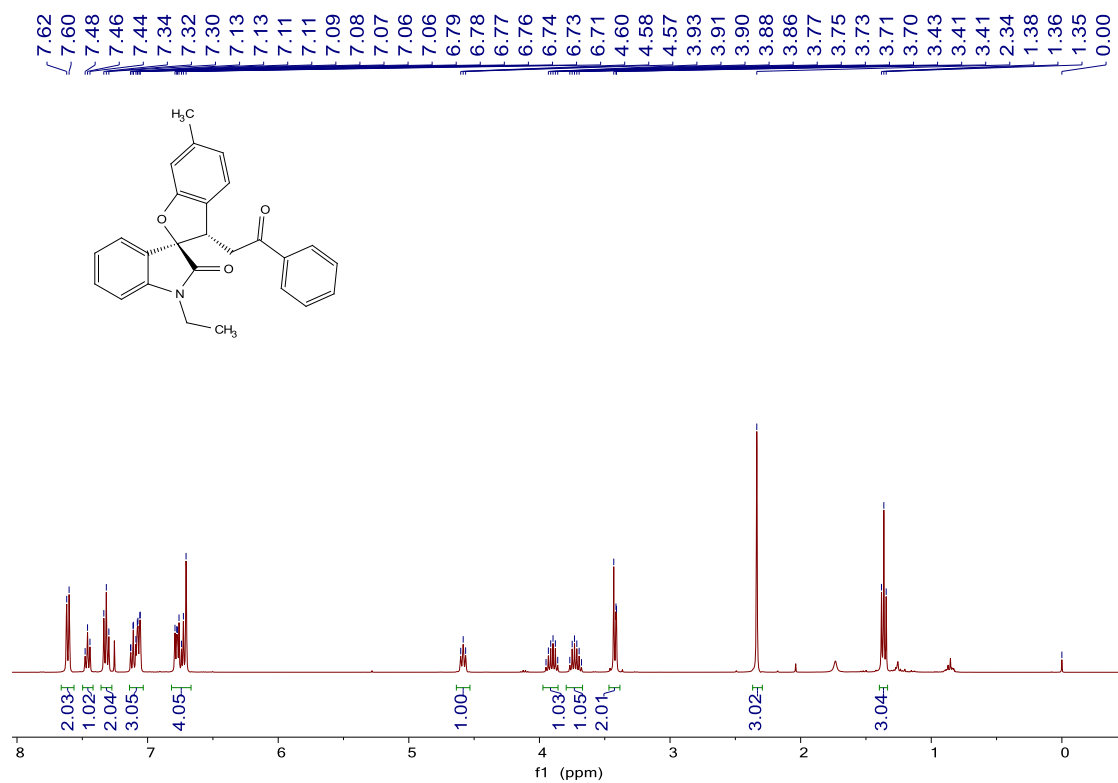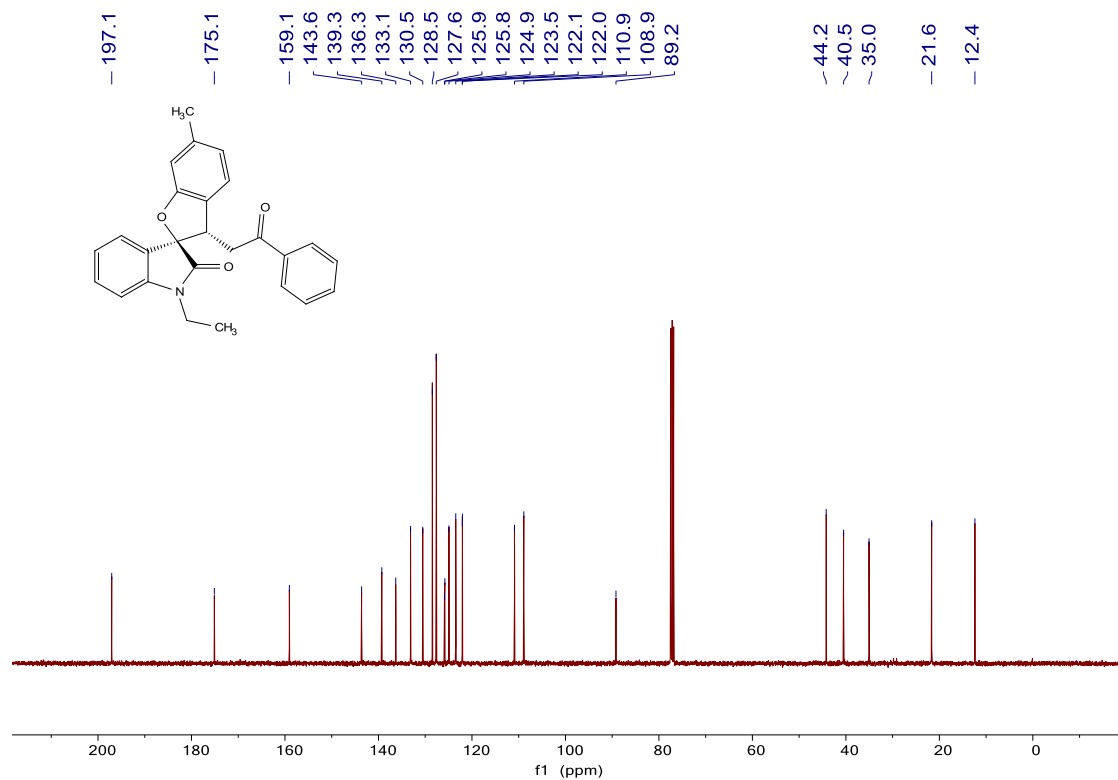

C34

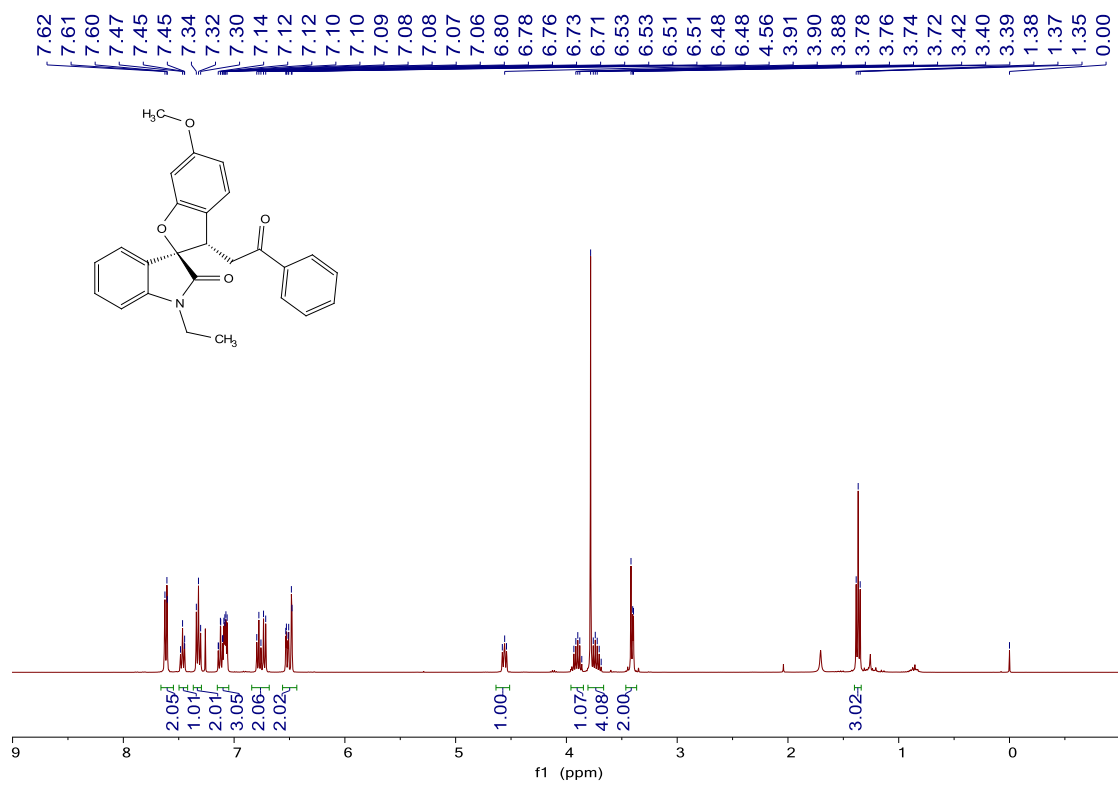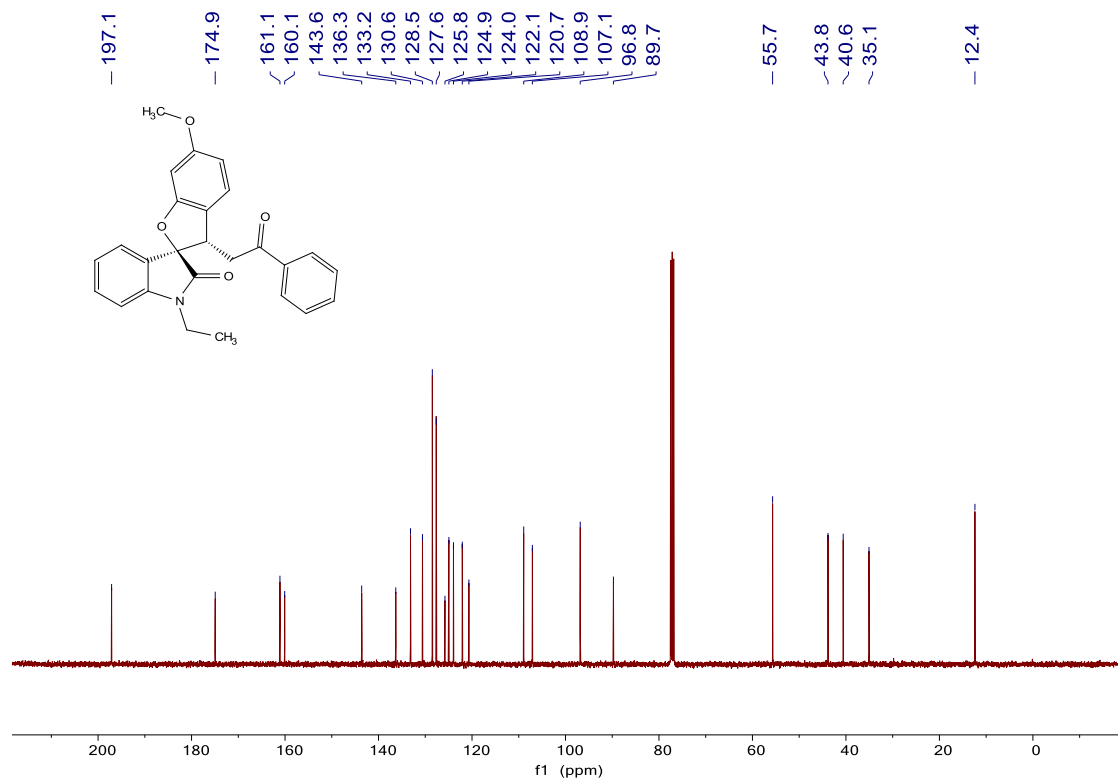

C35

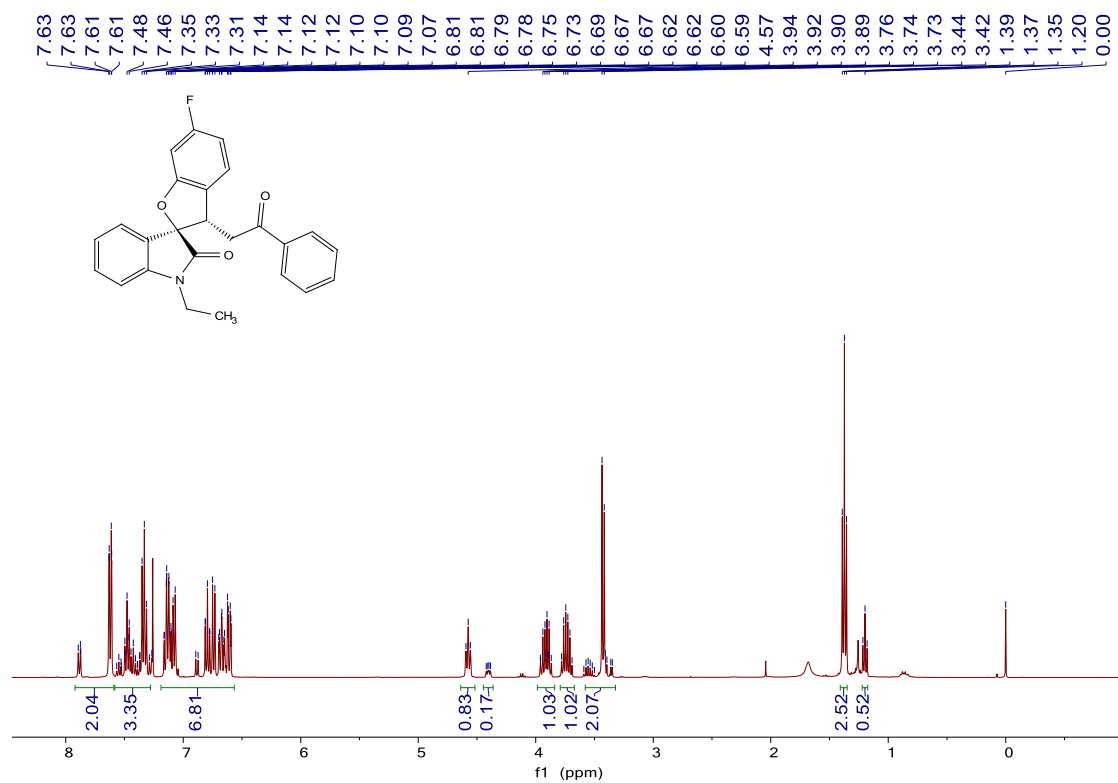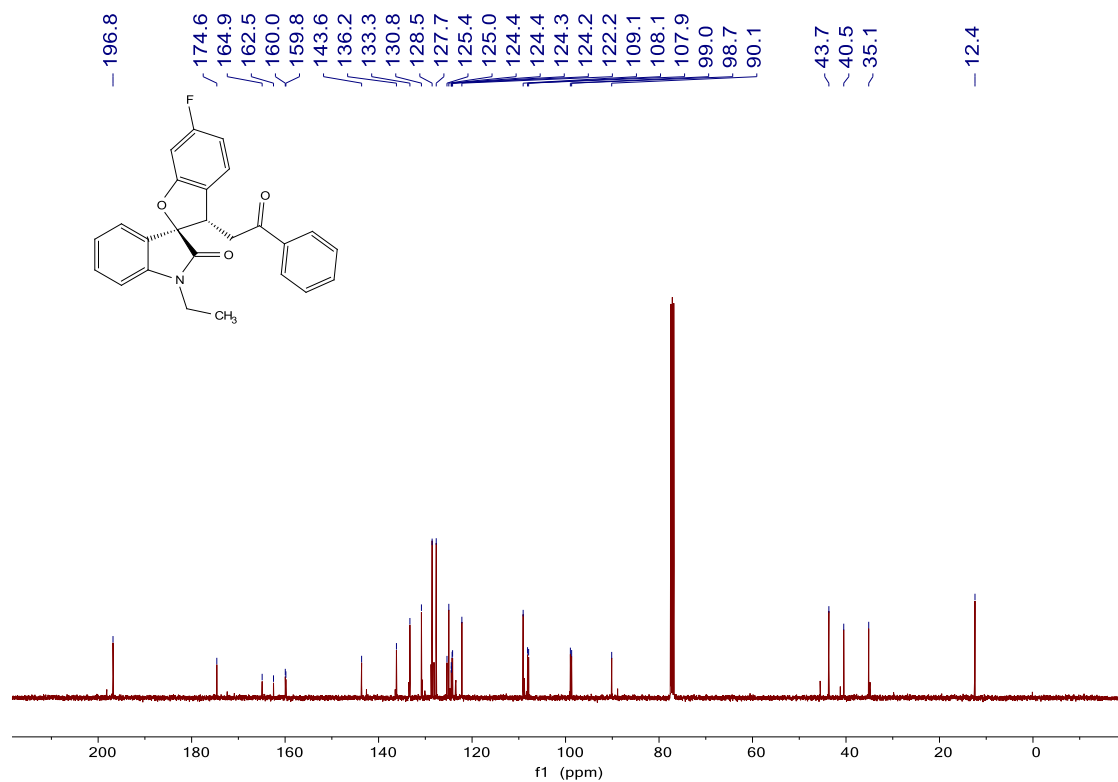

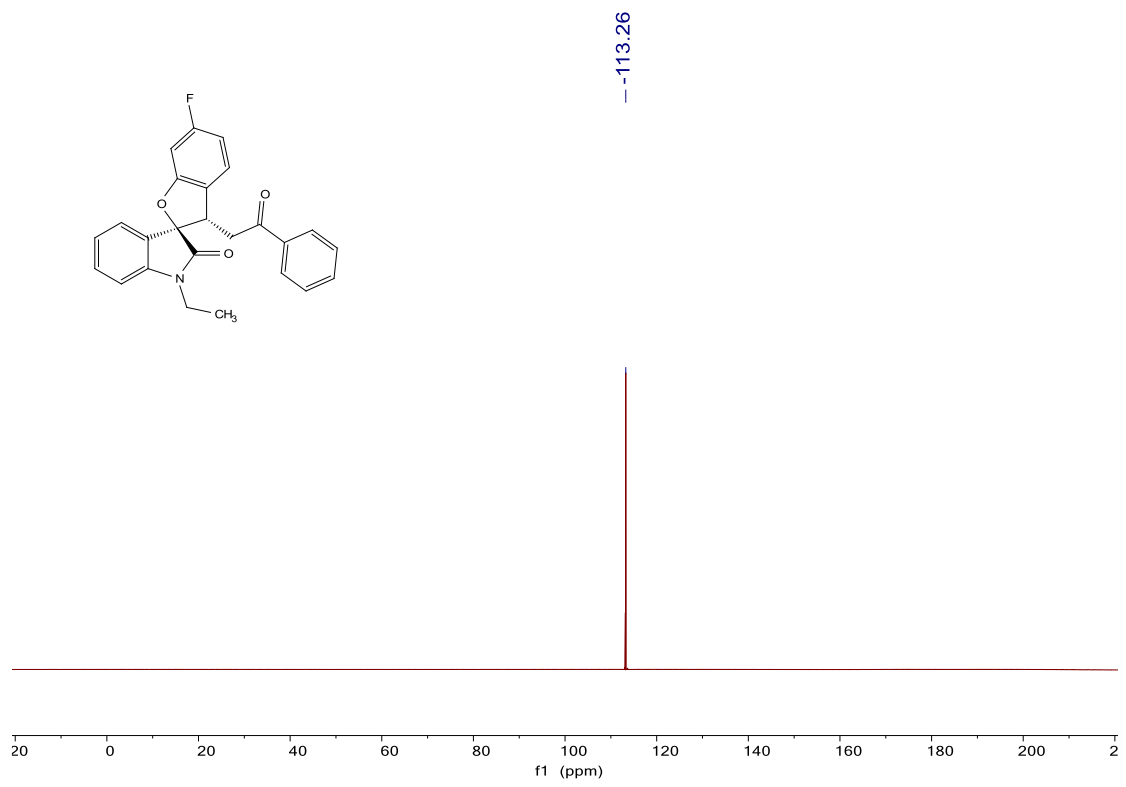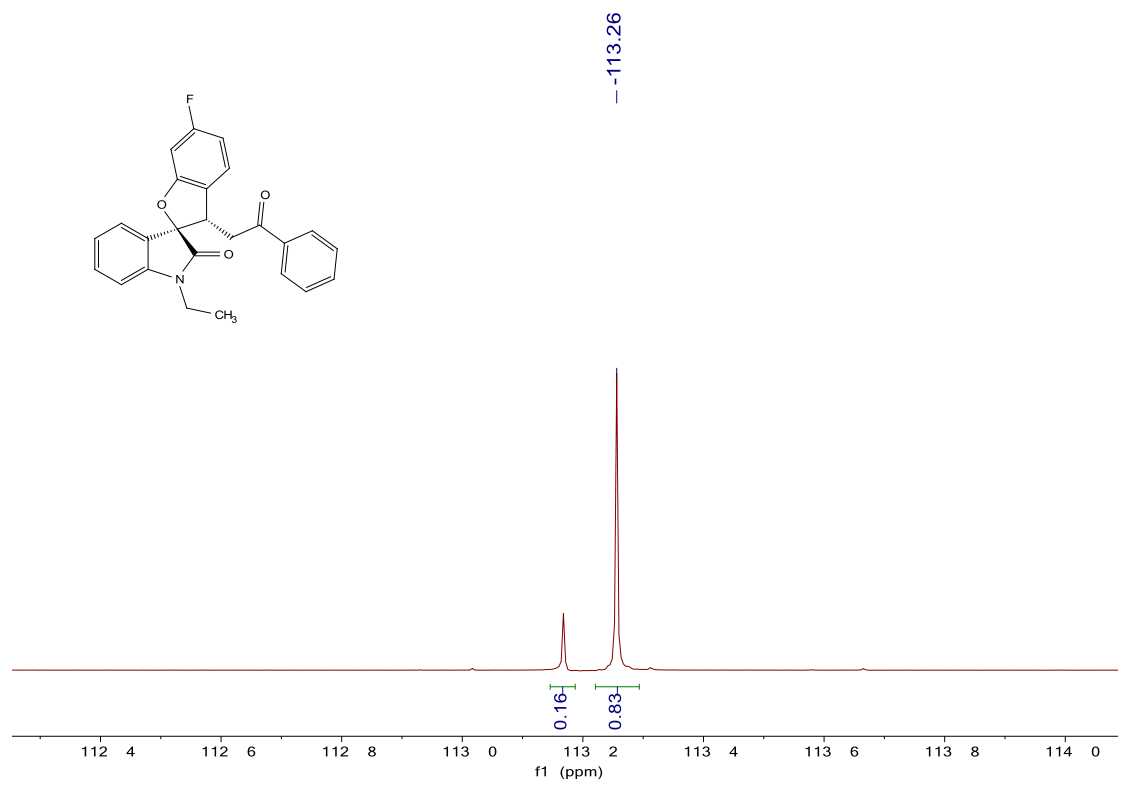

Minor diastereomer of C35

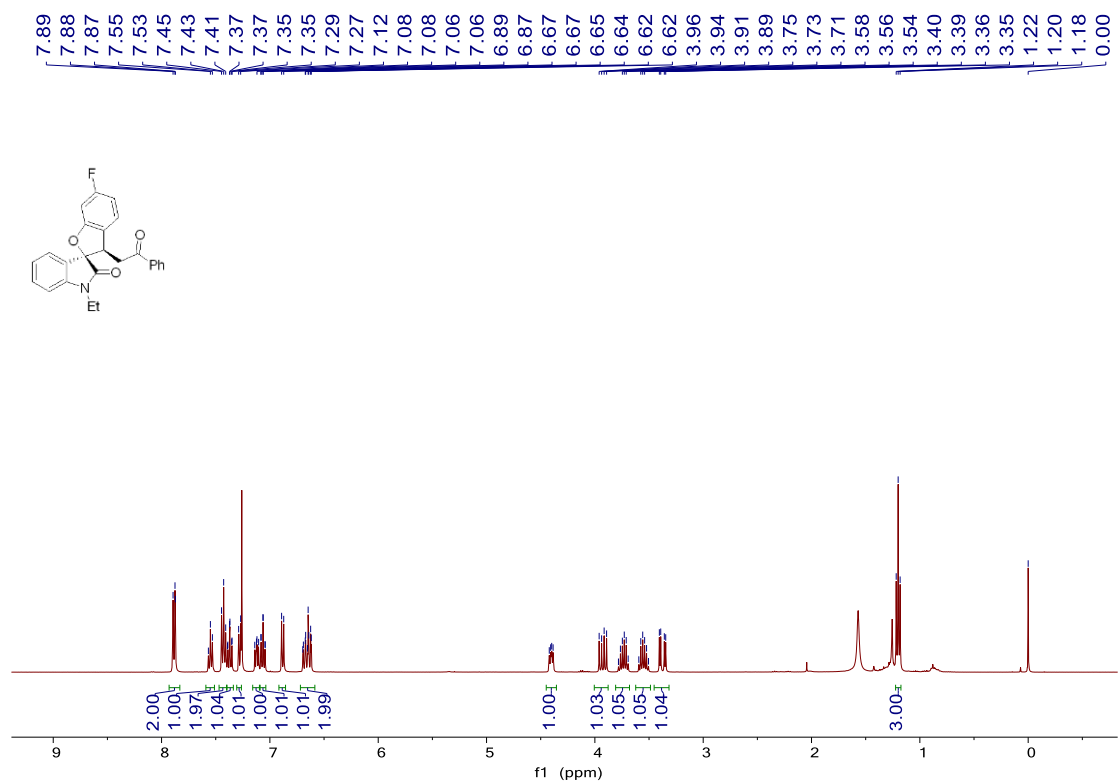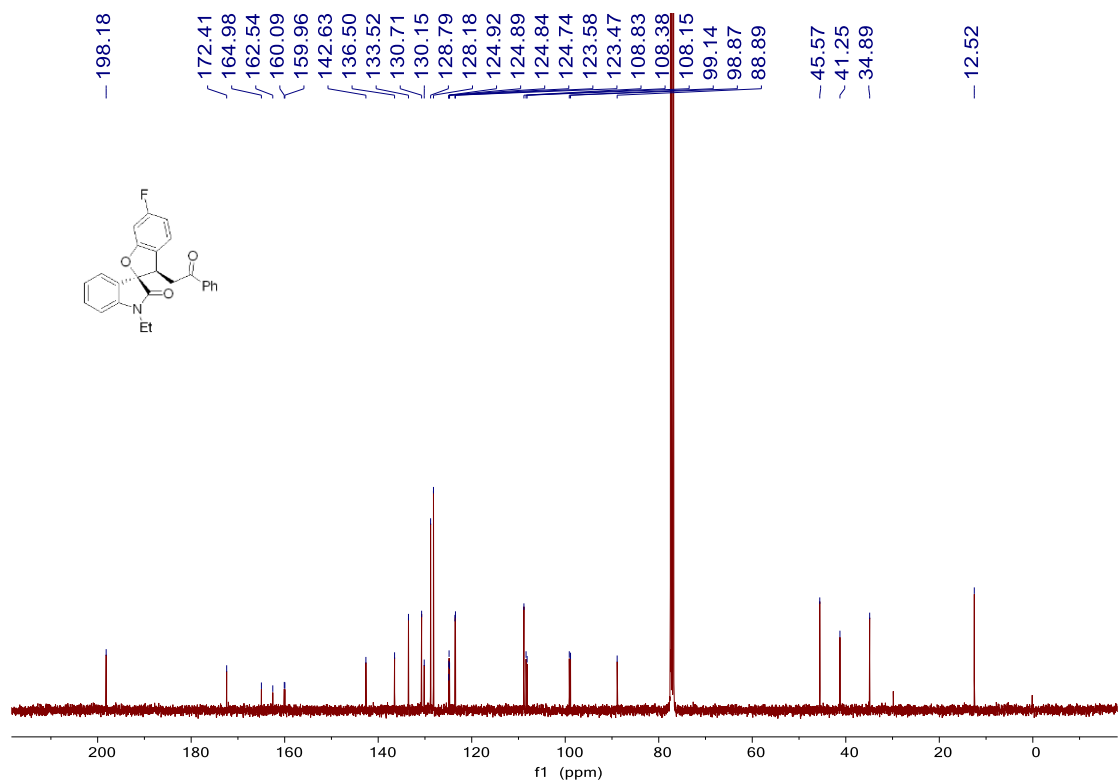

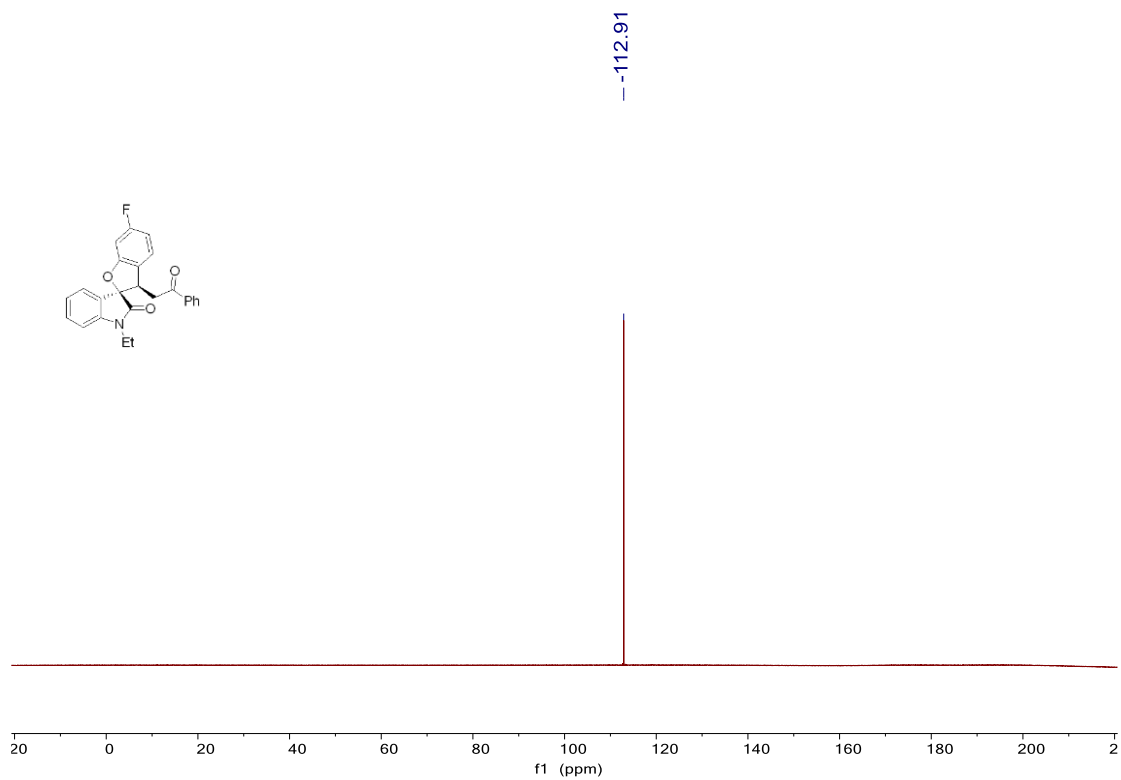

**Major diastereomer of C35**

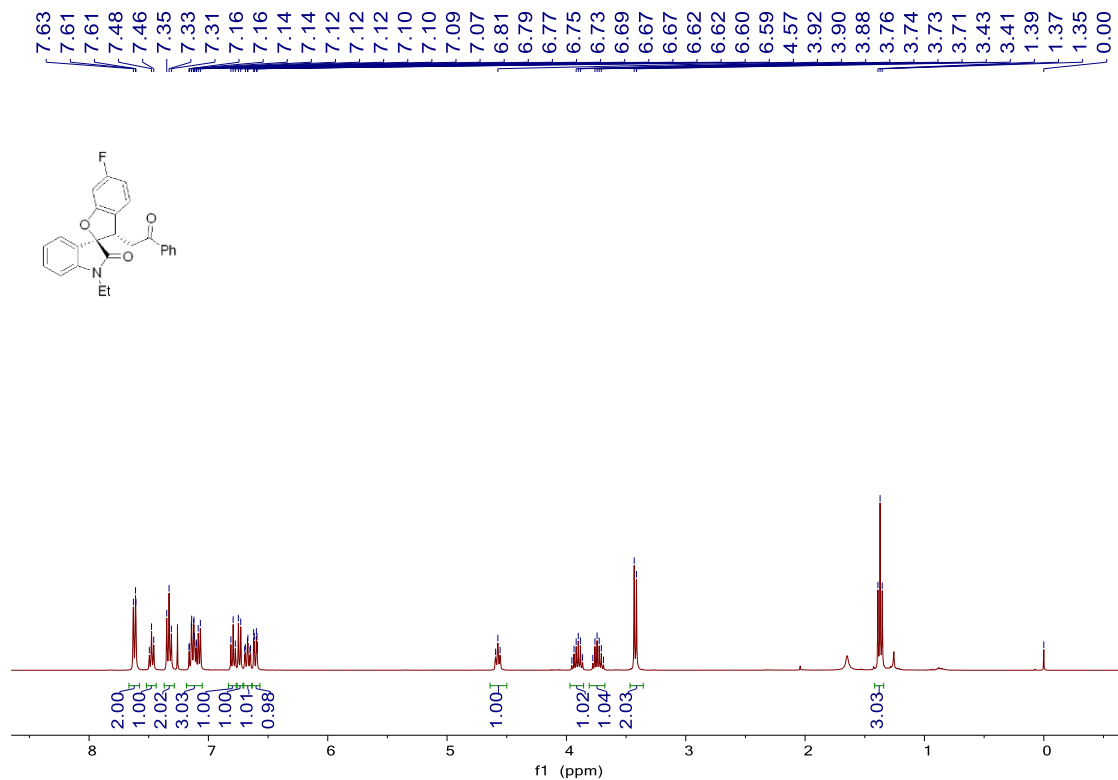

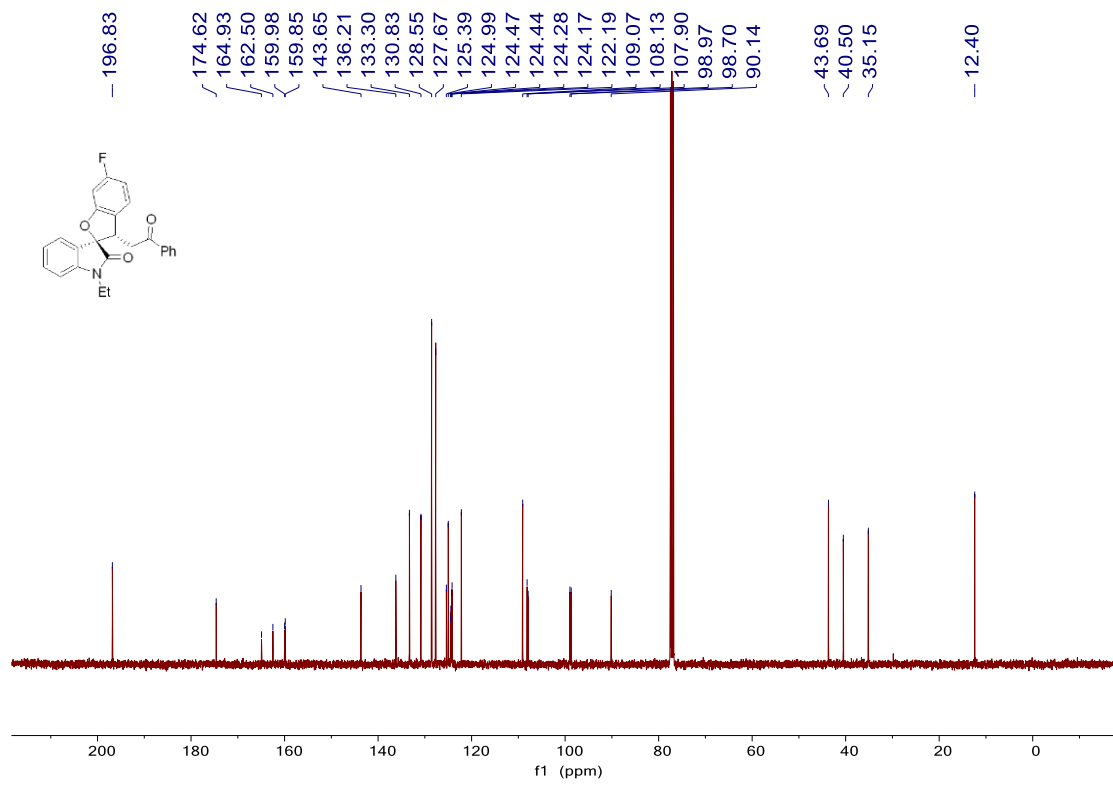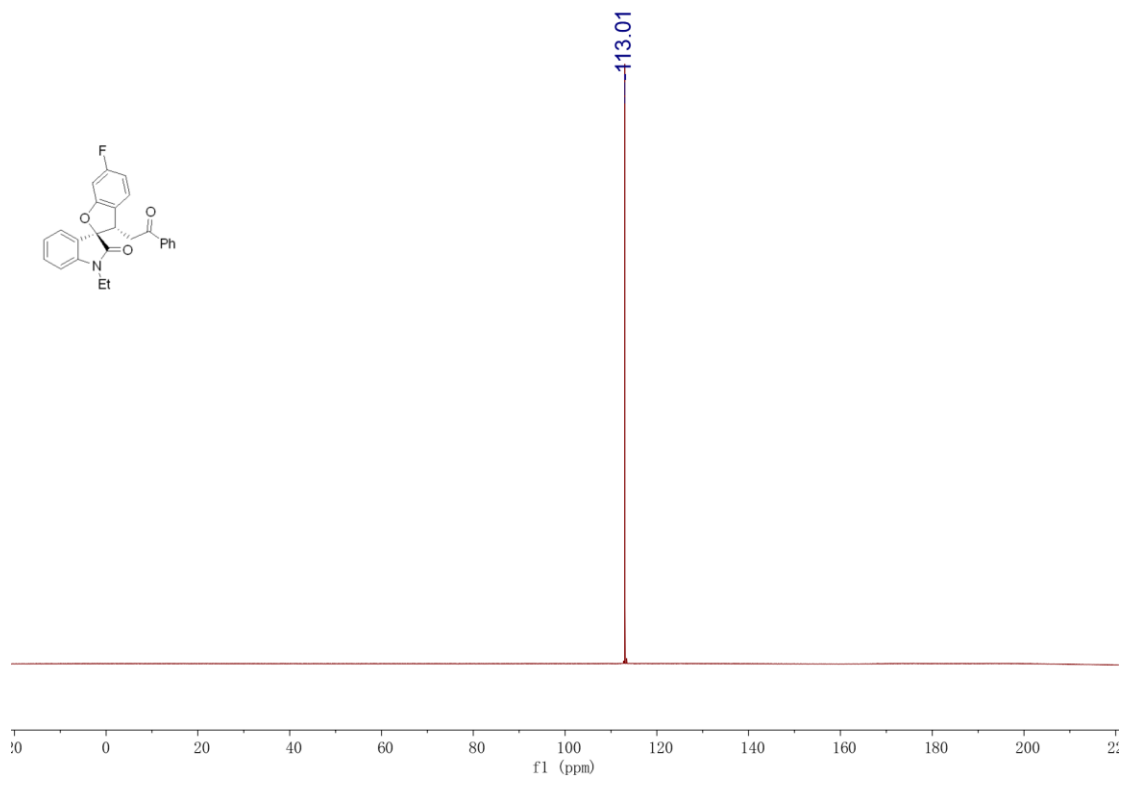

**C36**

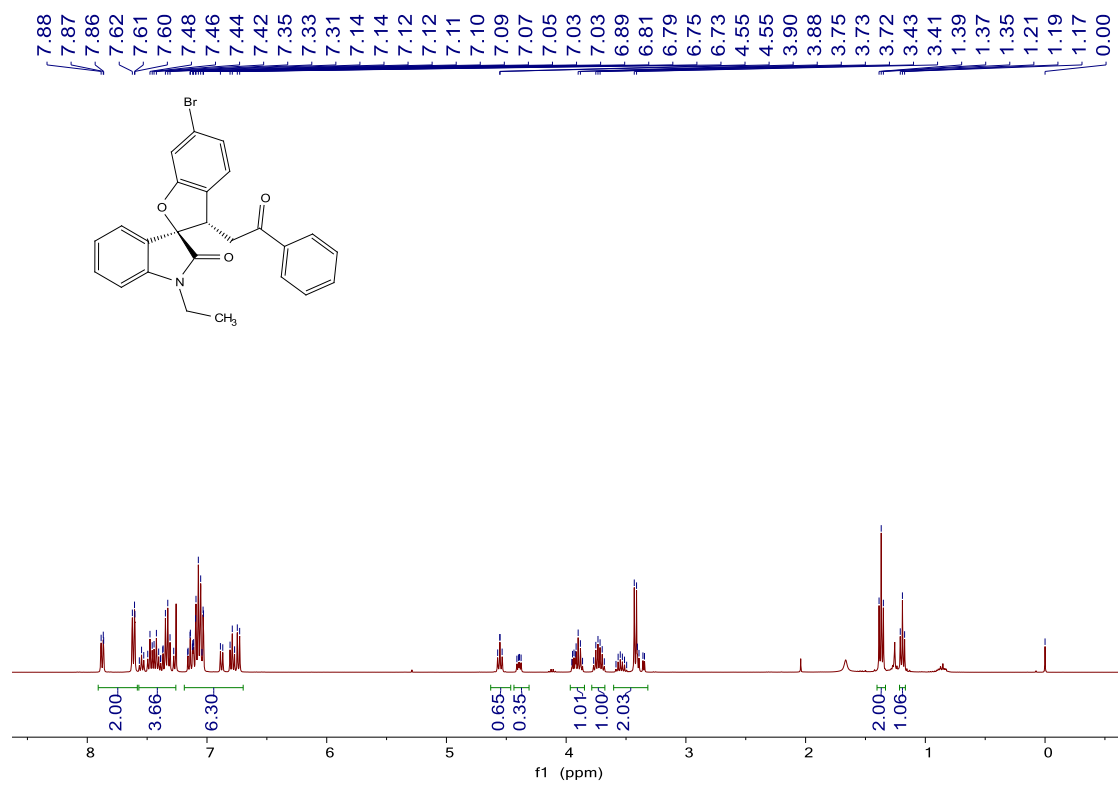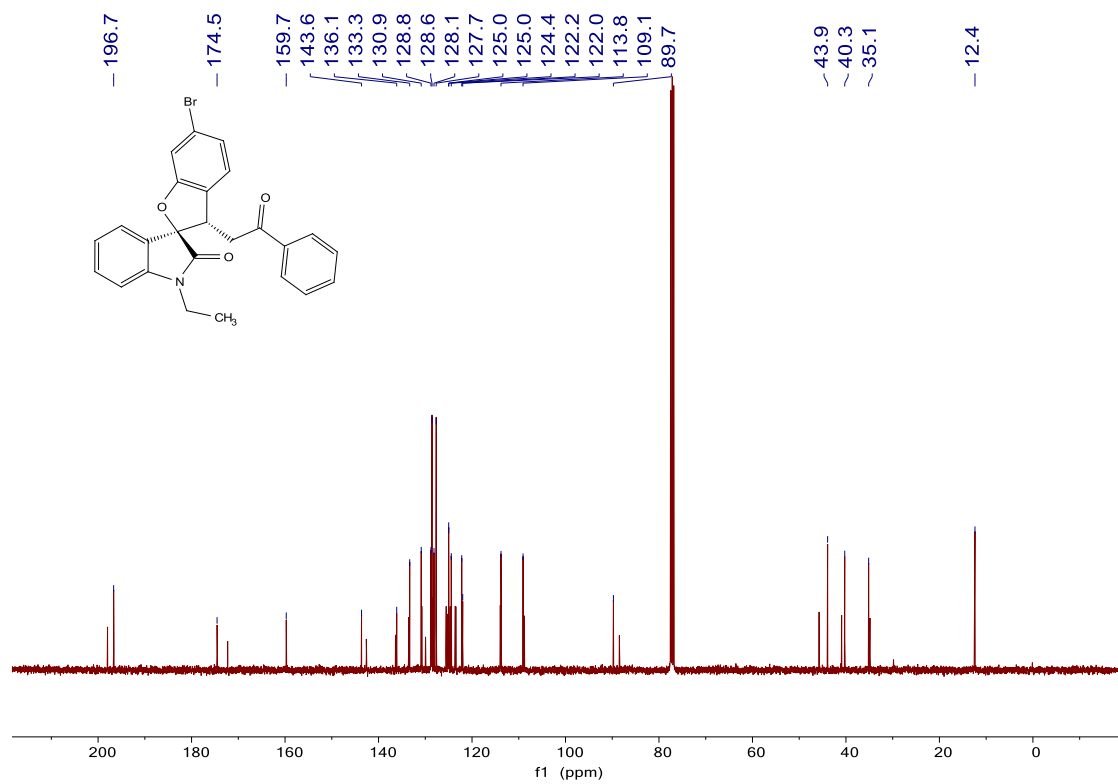



Minor diastereomer of C36

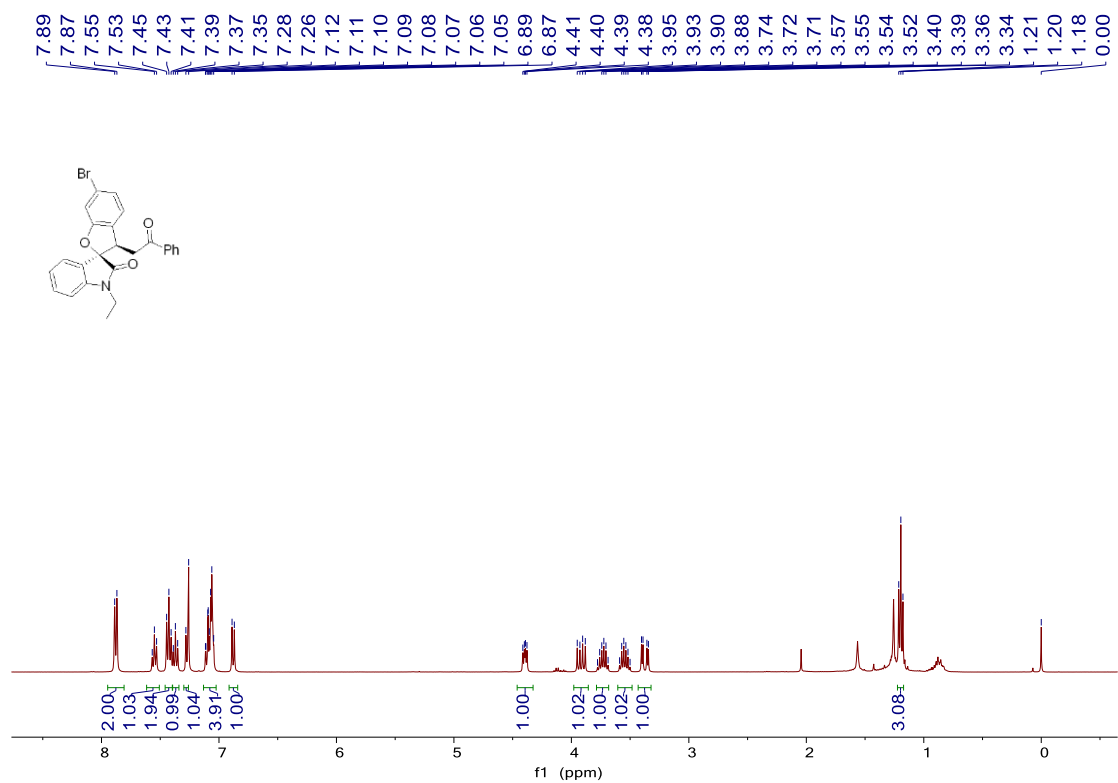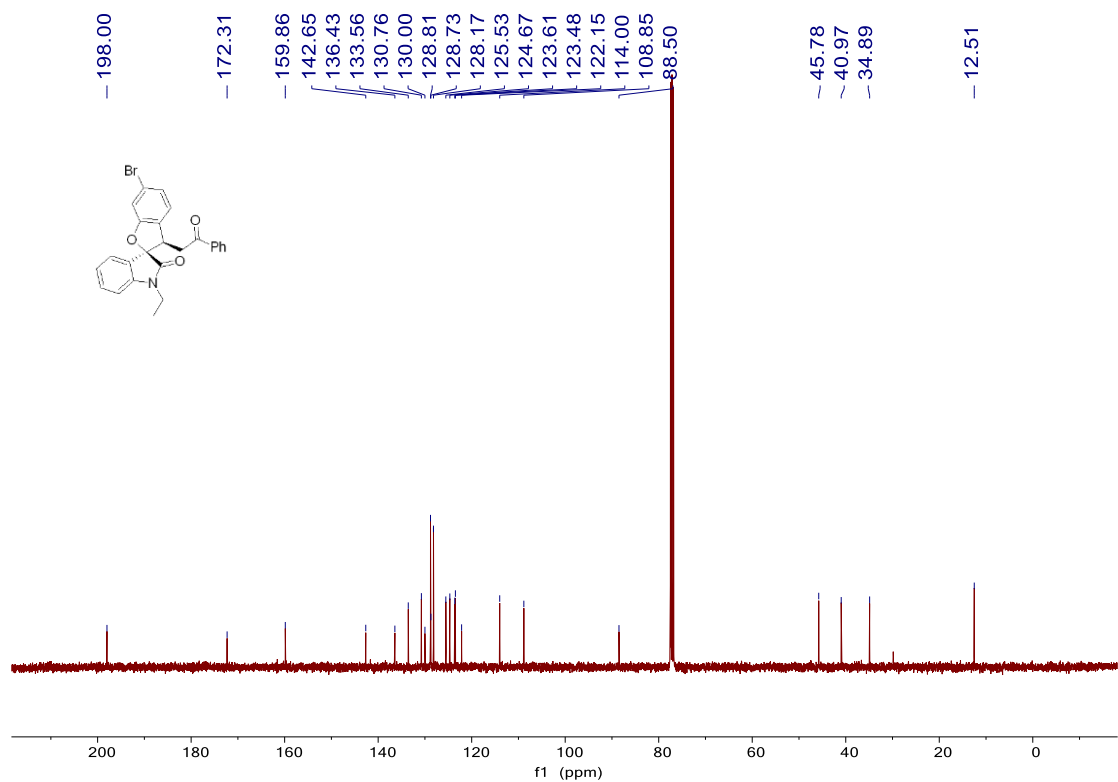

### Major diastereomer of C36

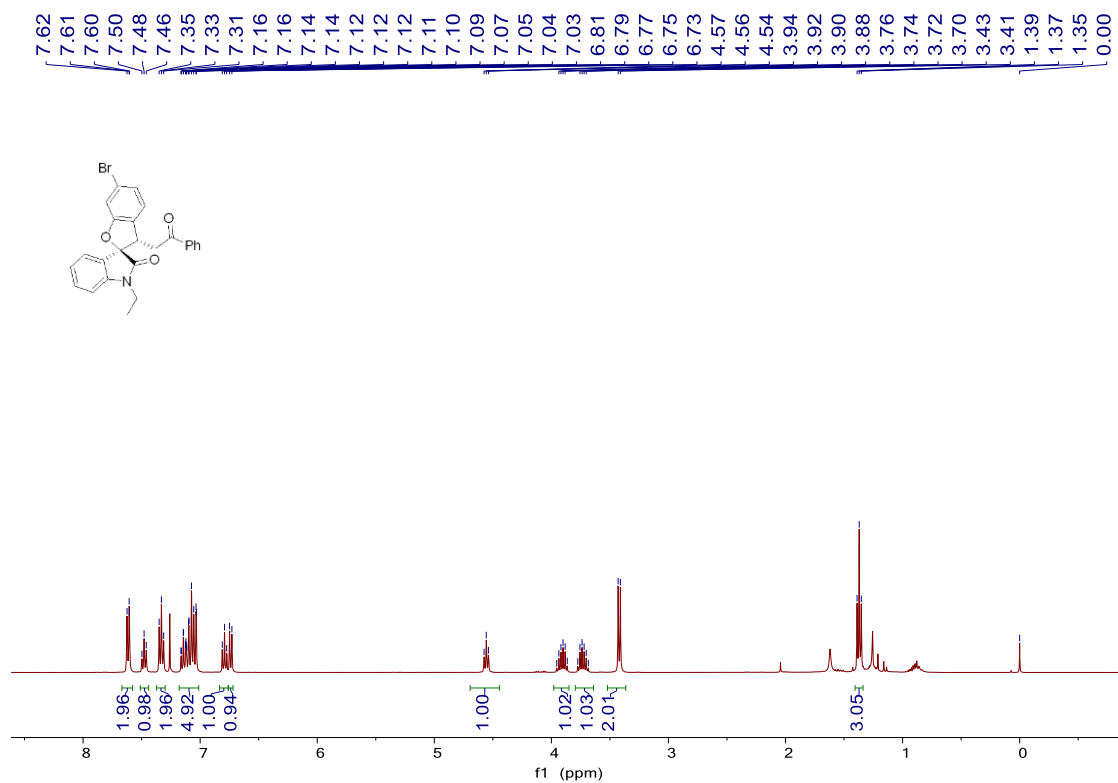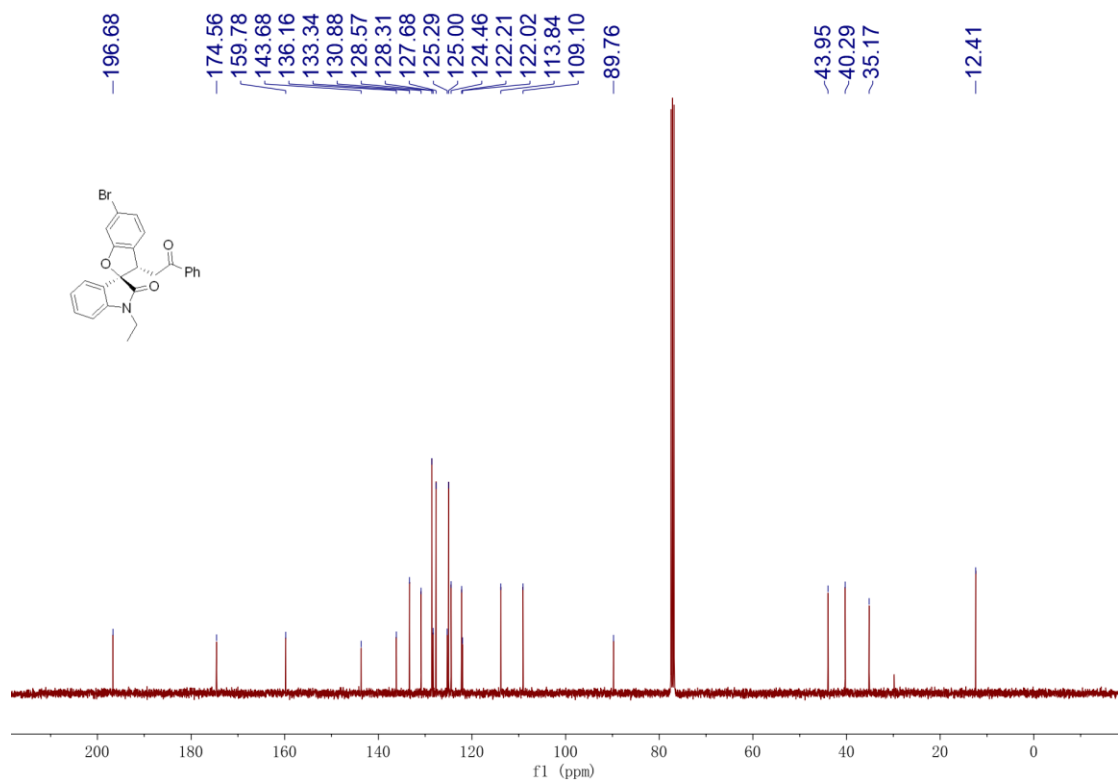

C37

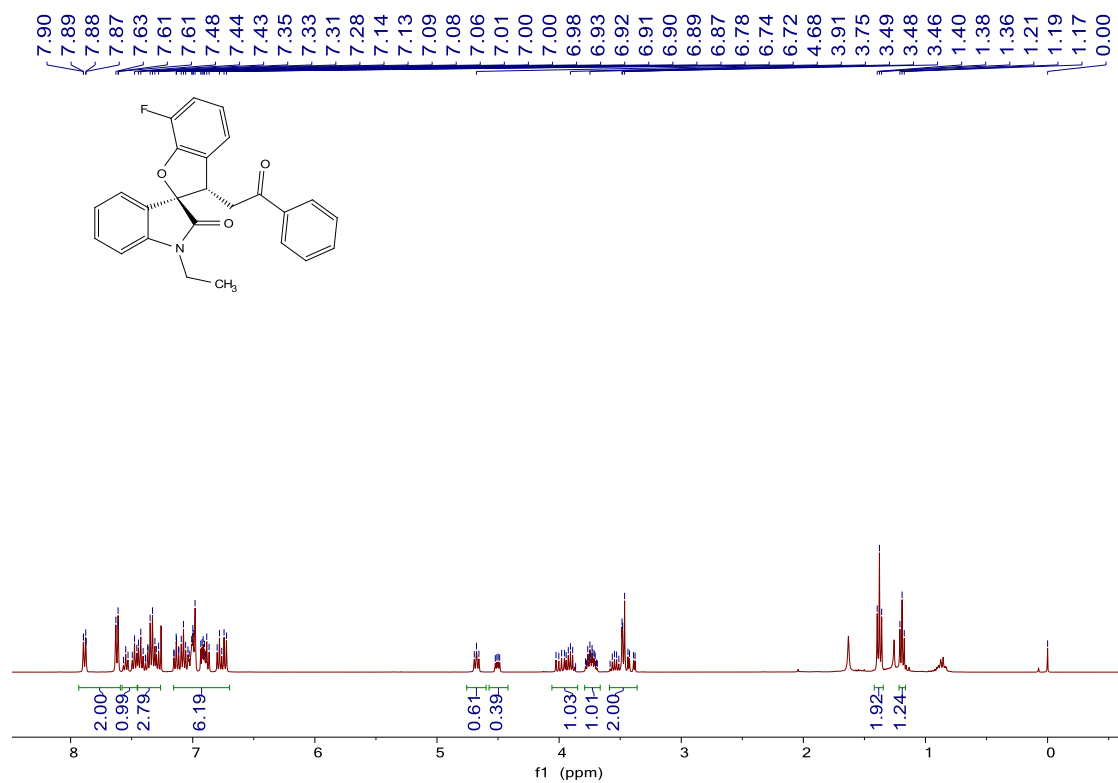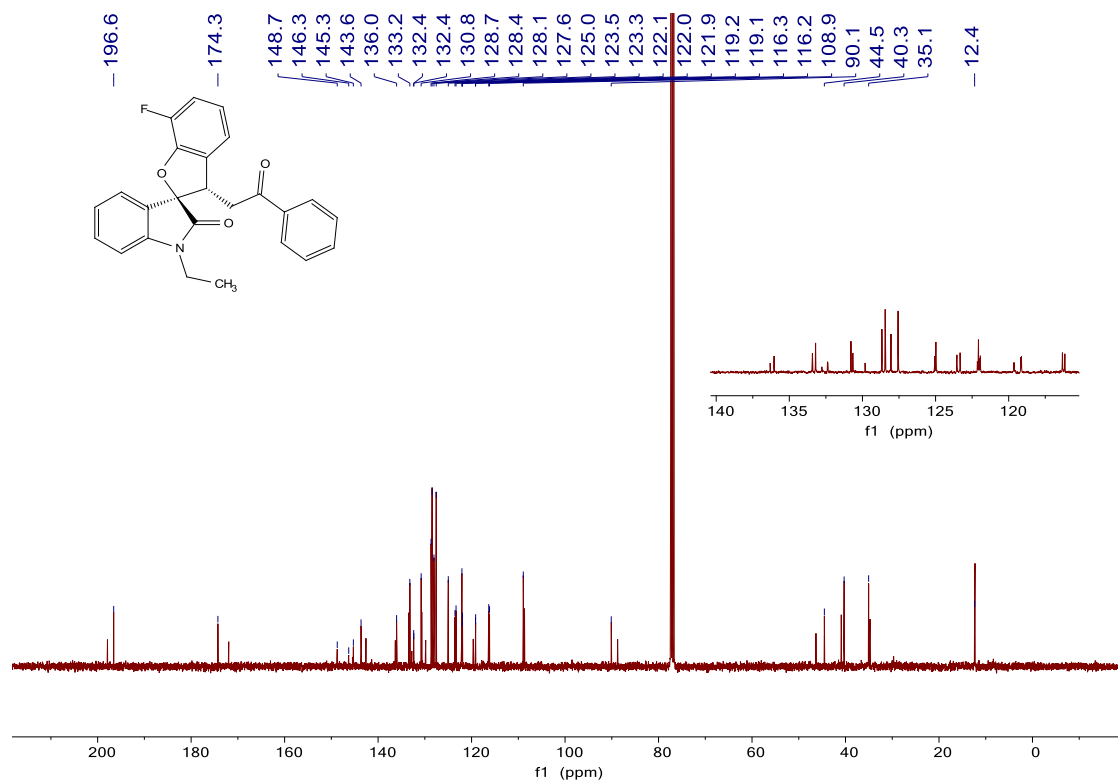

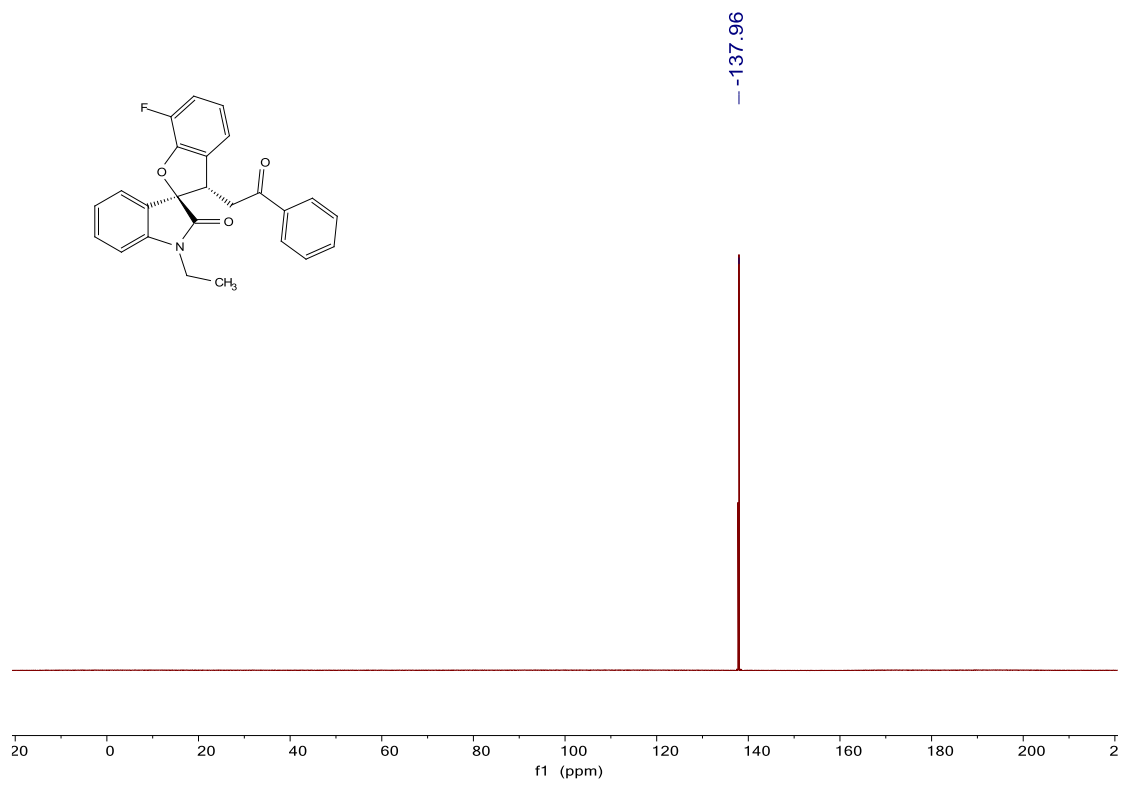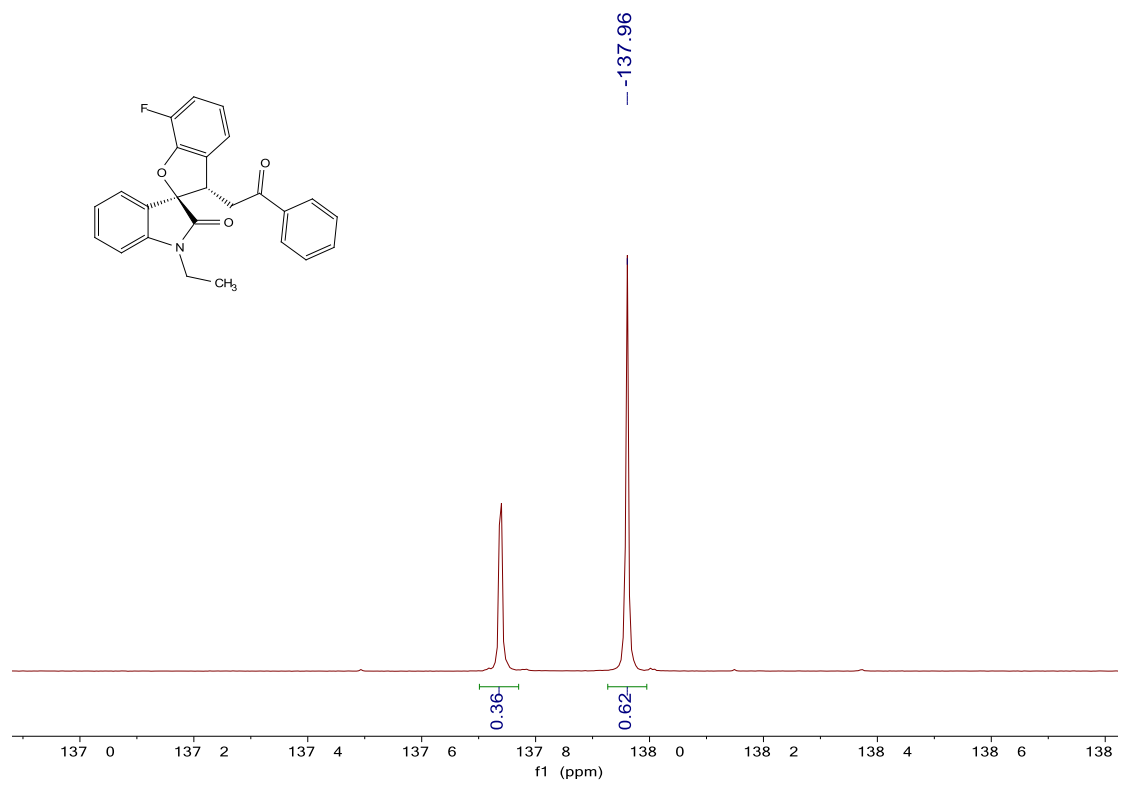

Minor diastereomer of C37

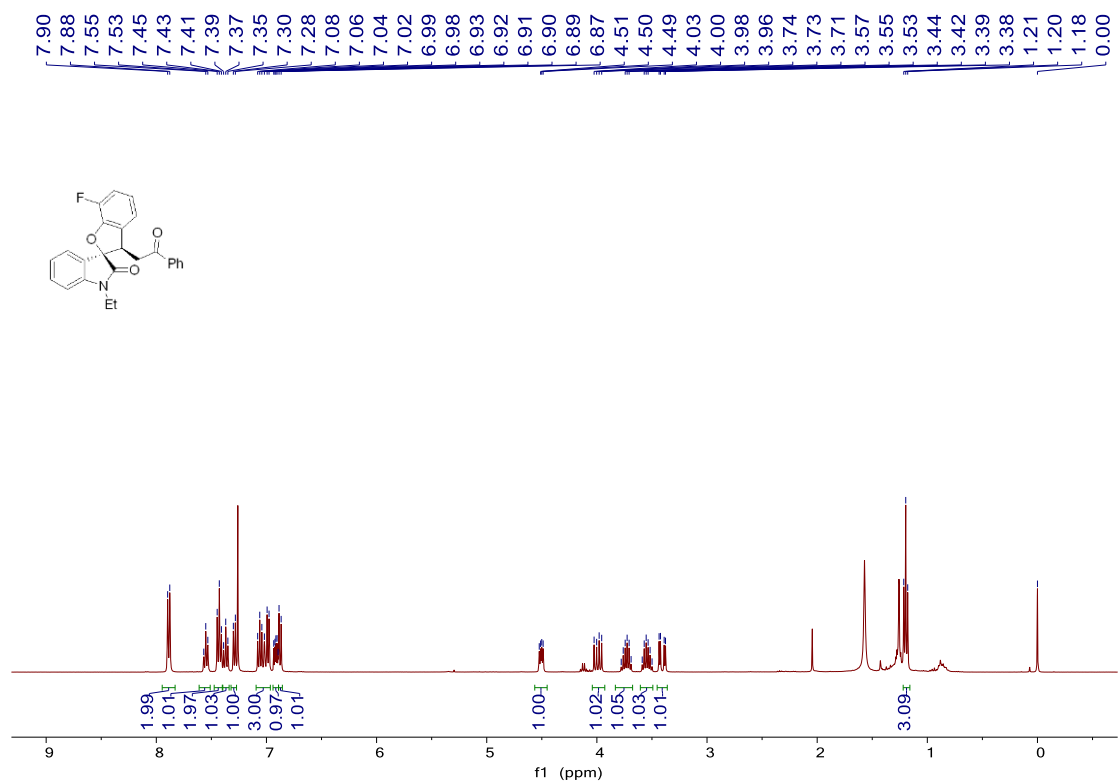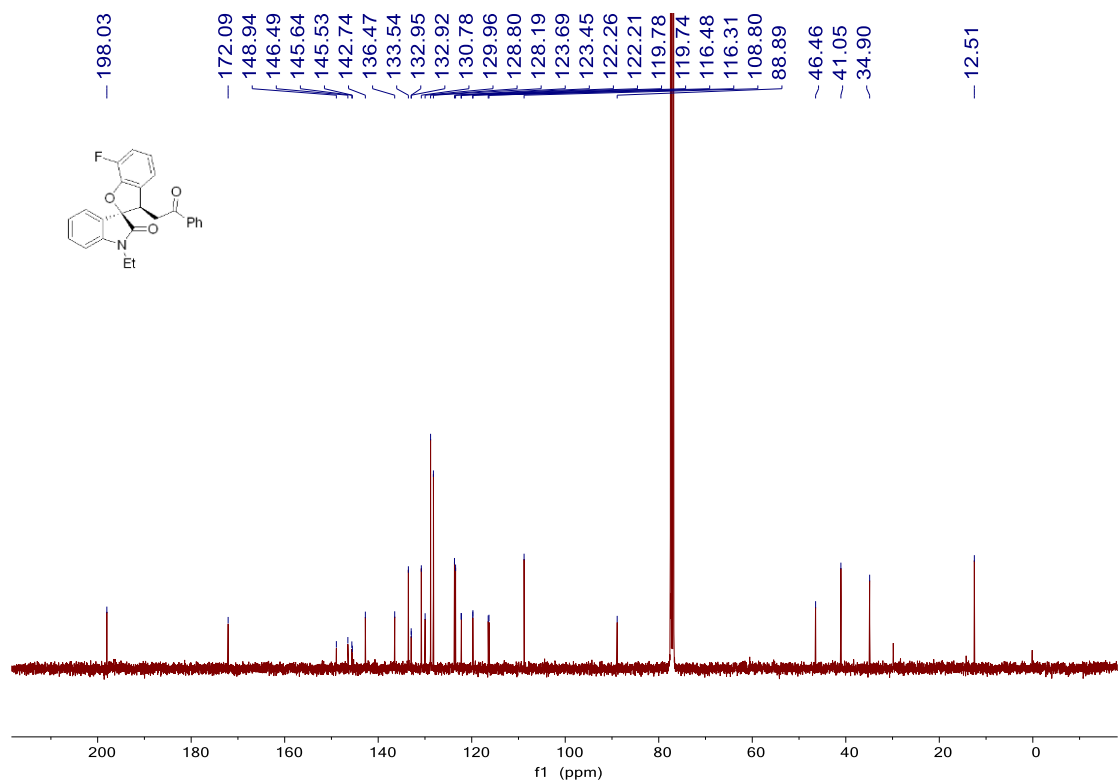

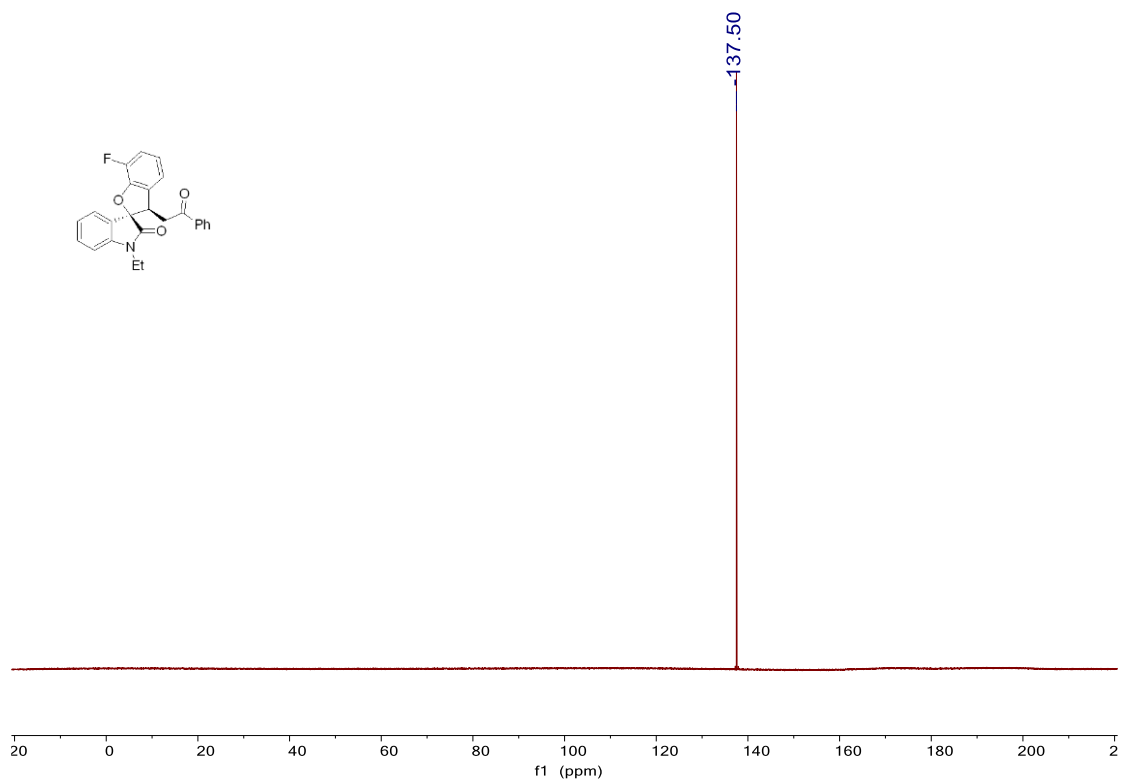

**Major diastereomer of C37**

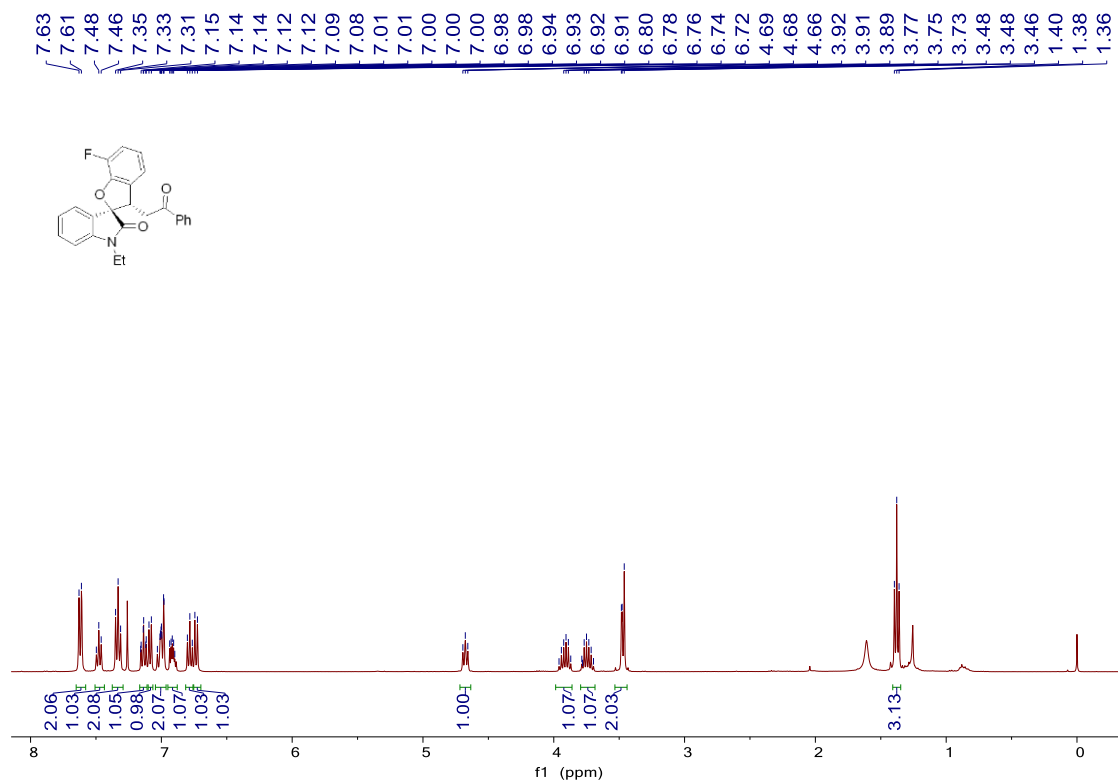

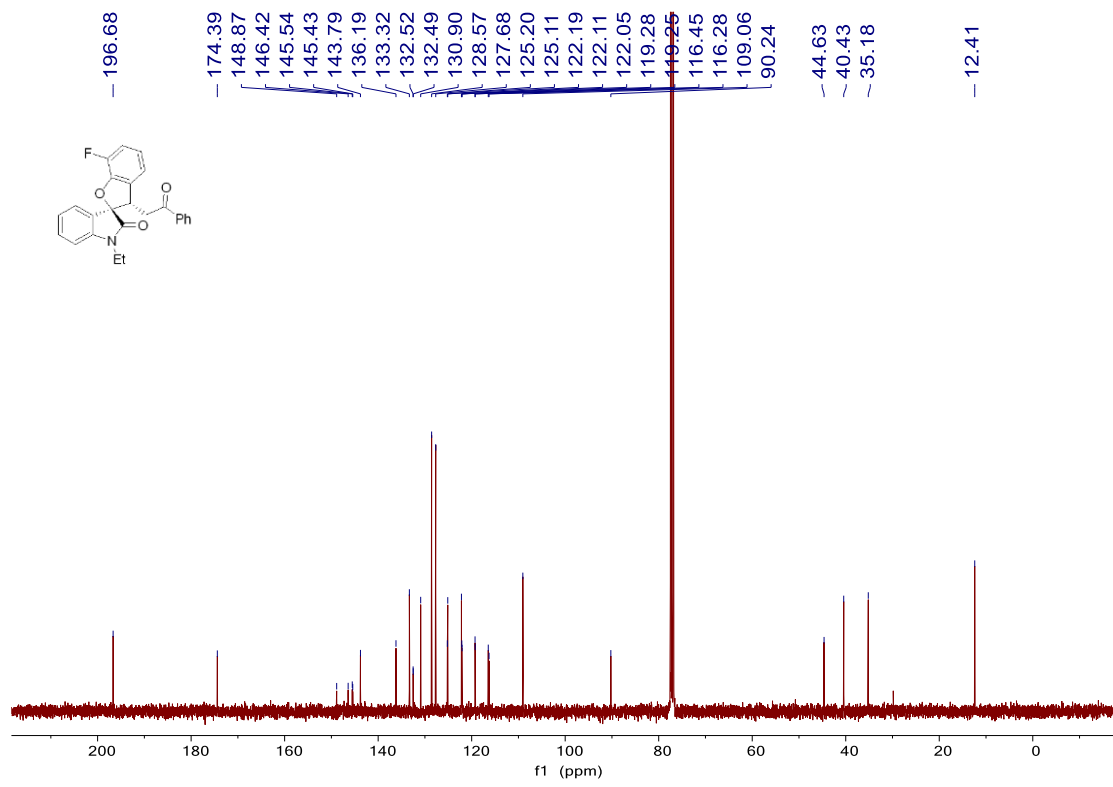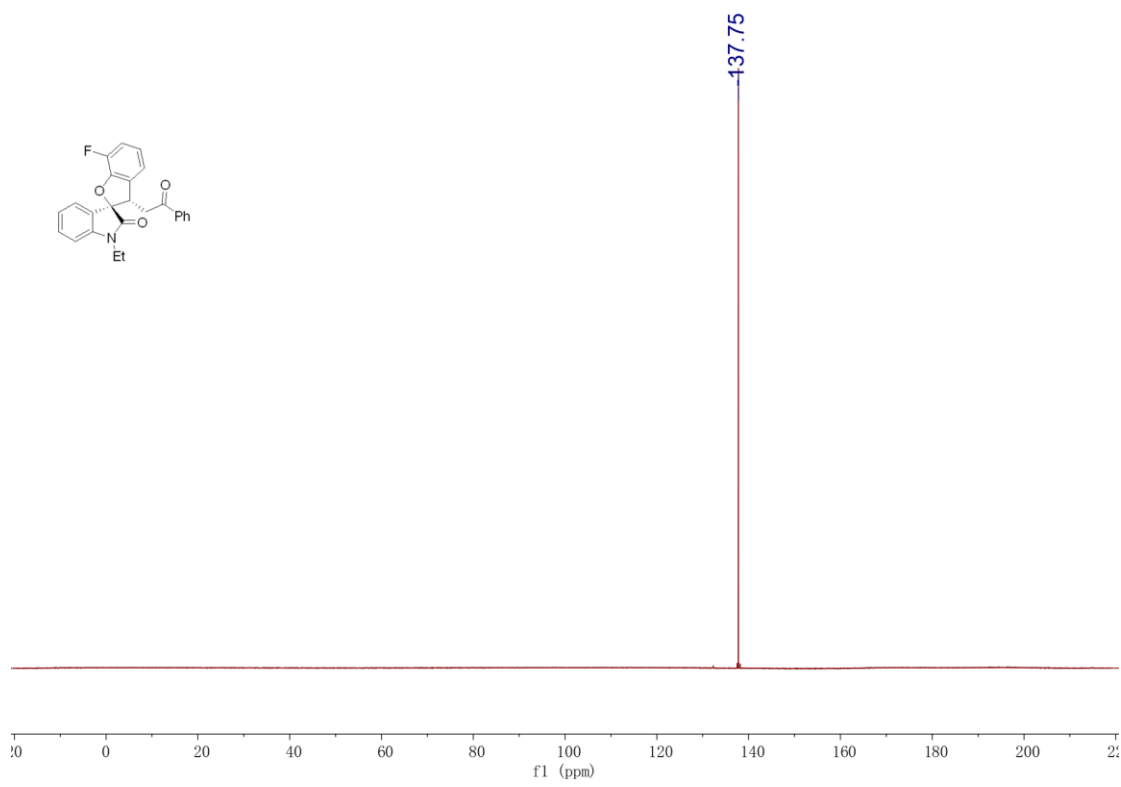

**C38**

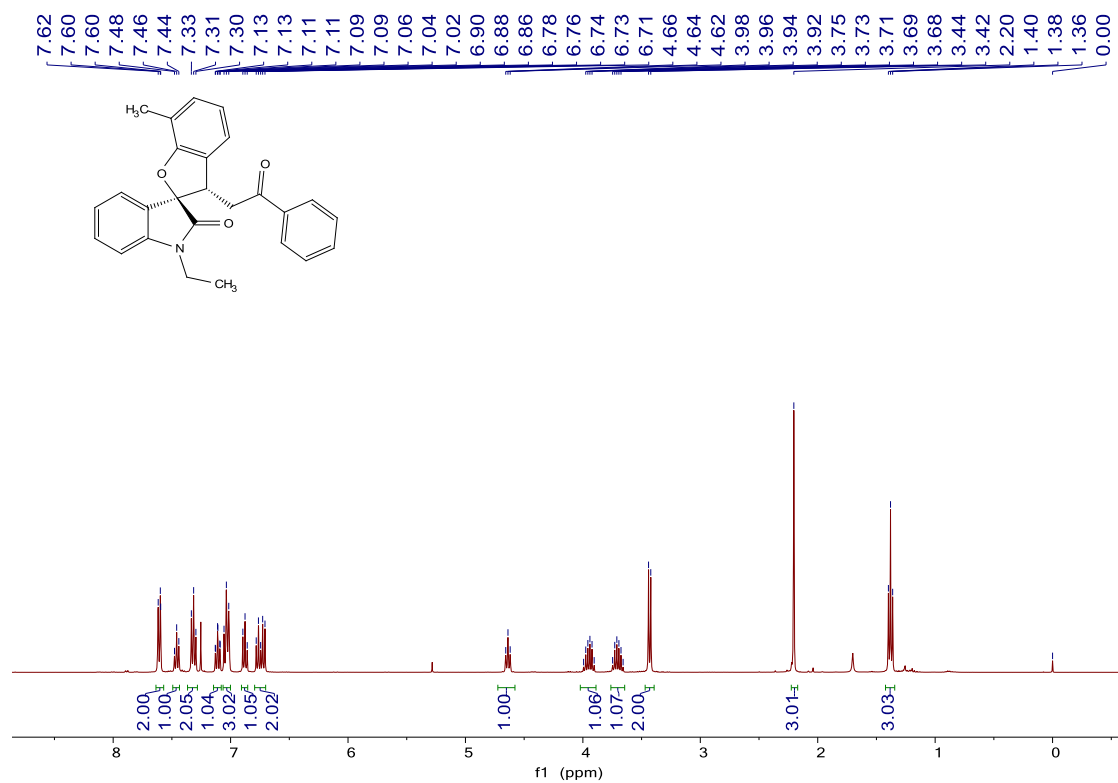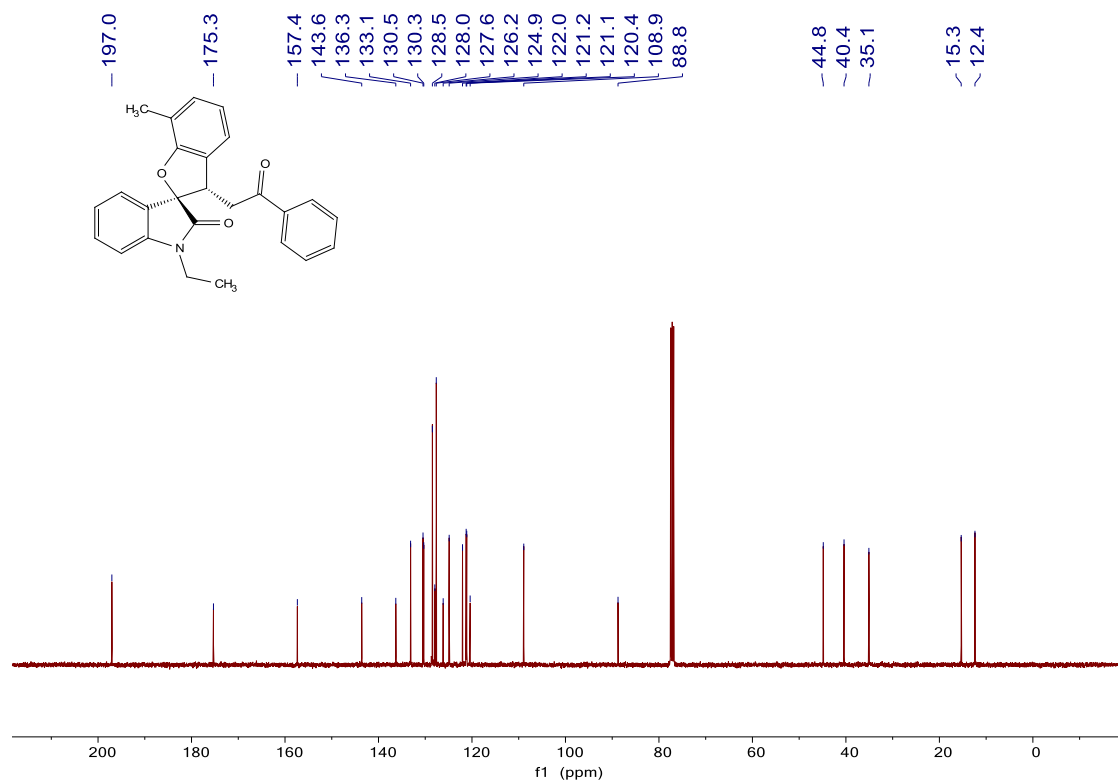



C39

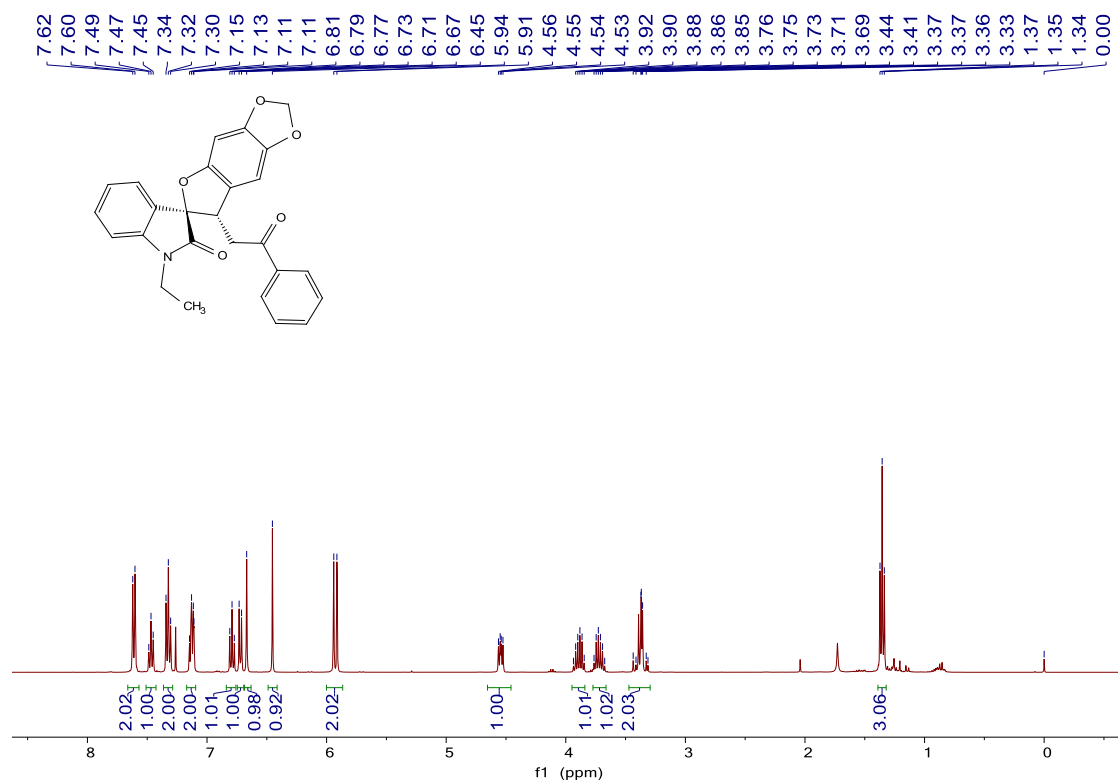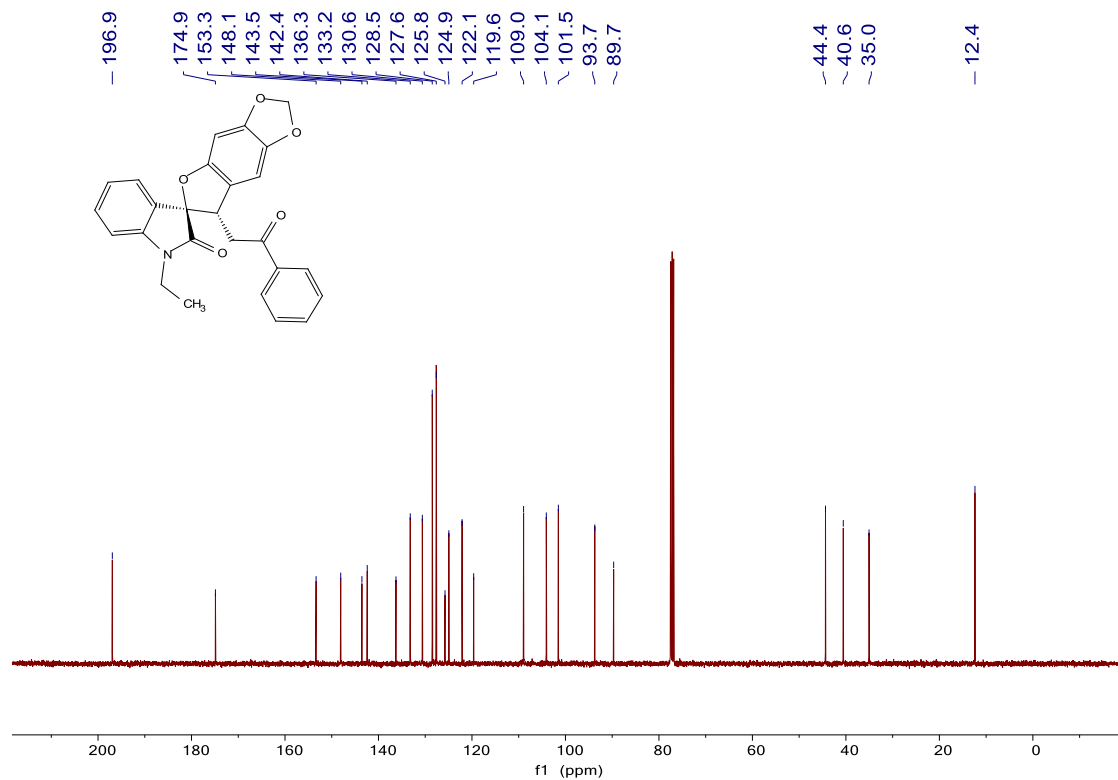

**C40**

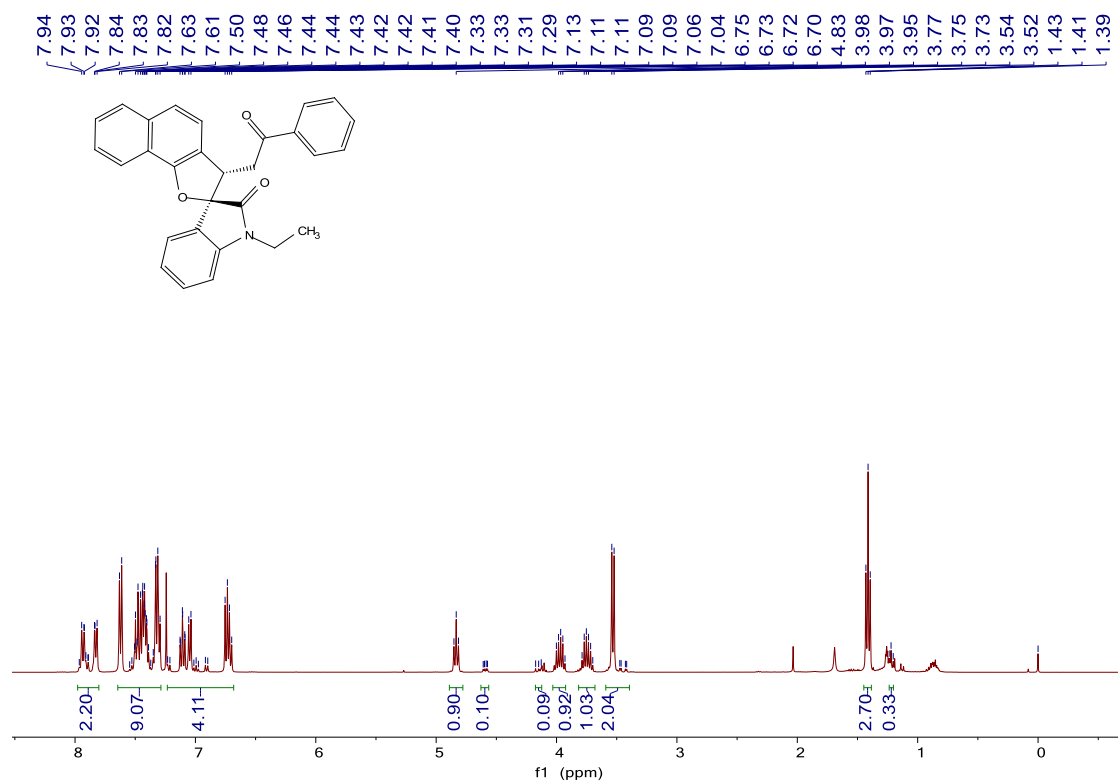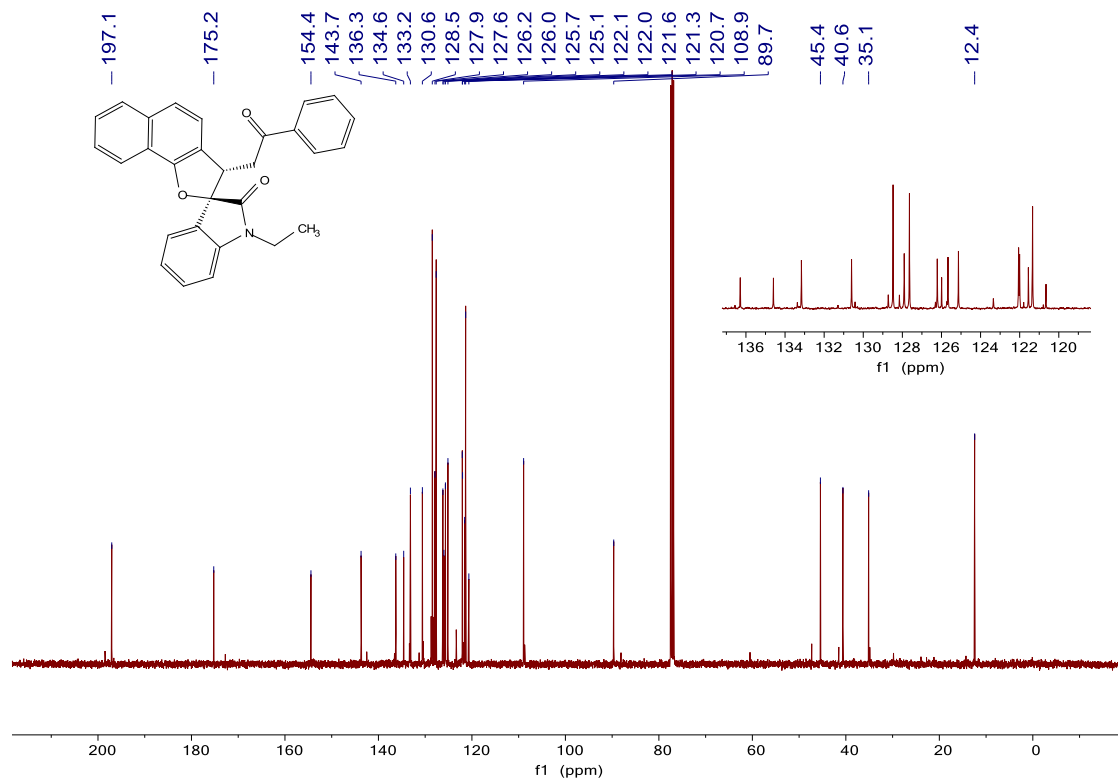

Minor diastereomer of C40

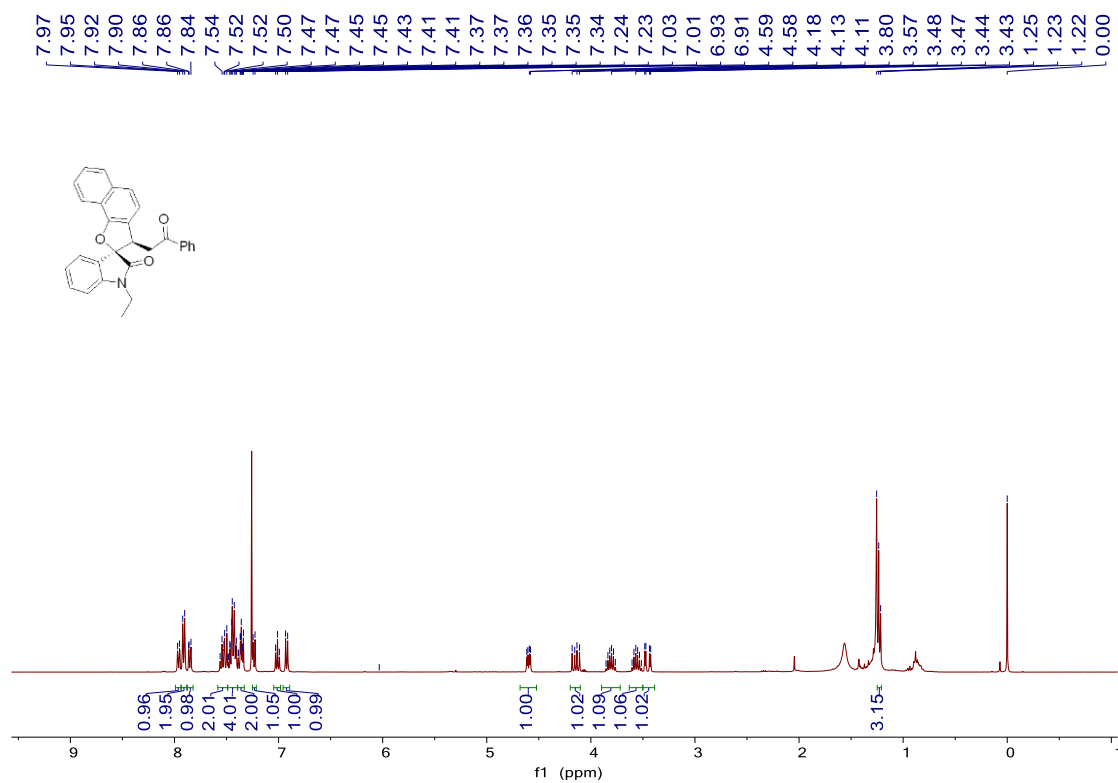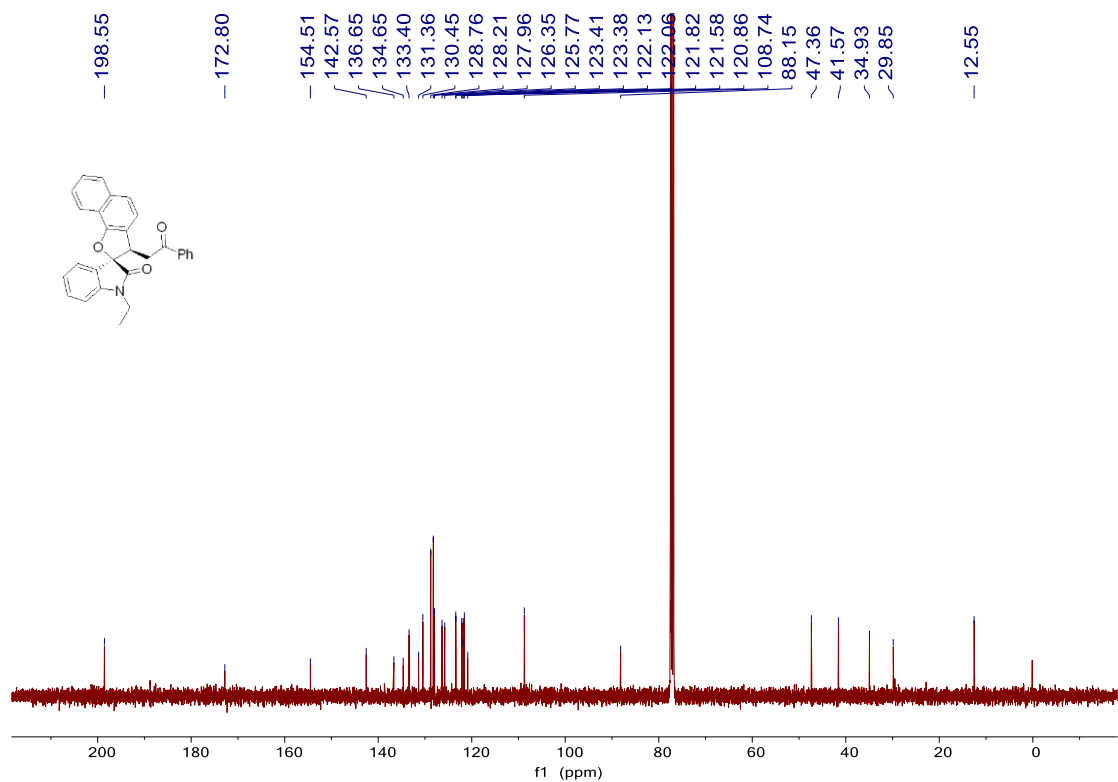

Major diastereomer of C40

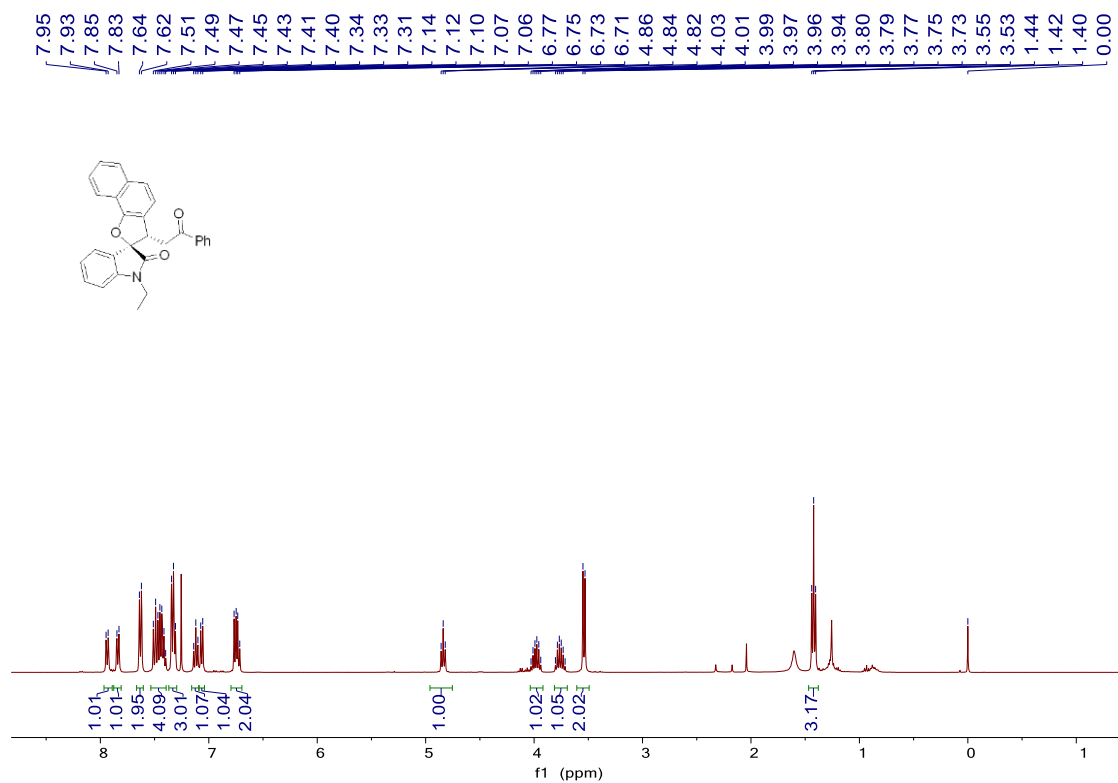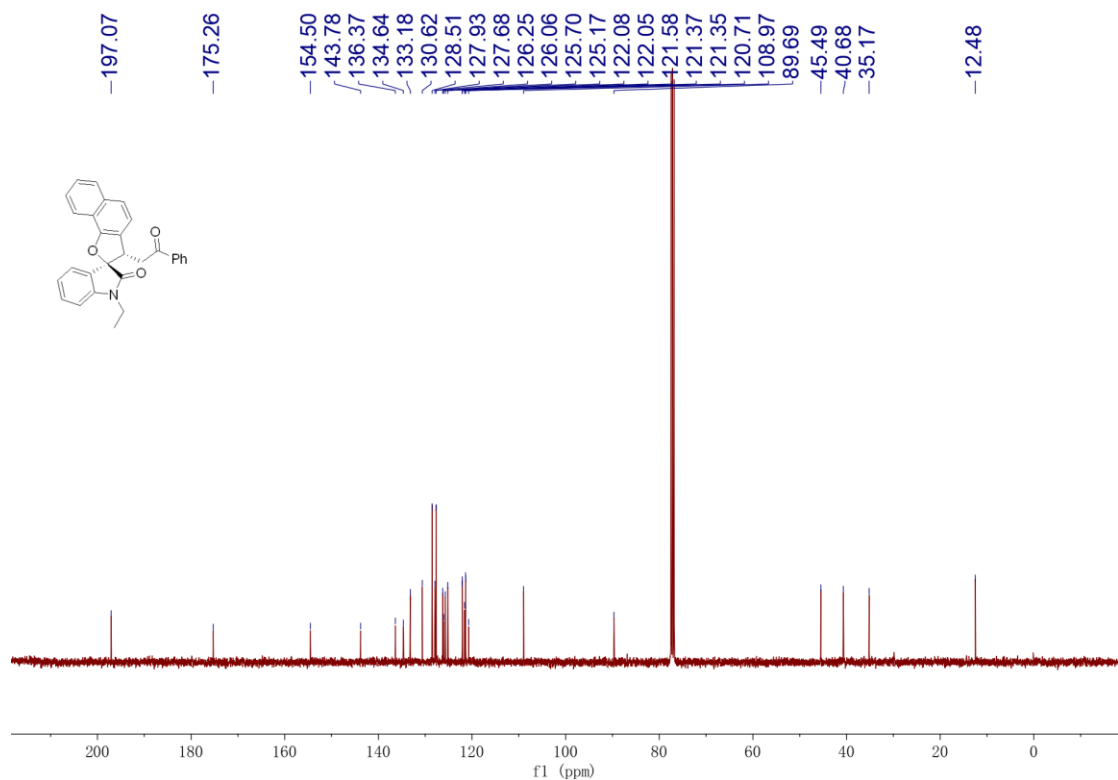

# C41

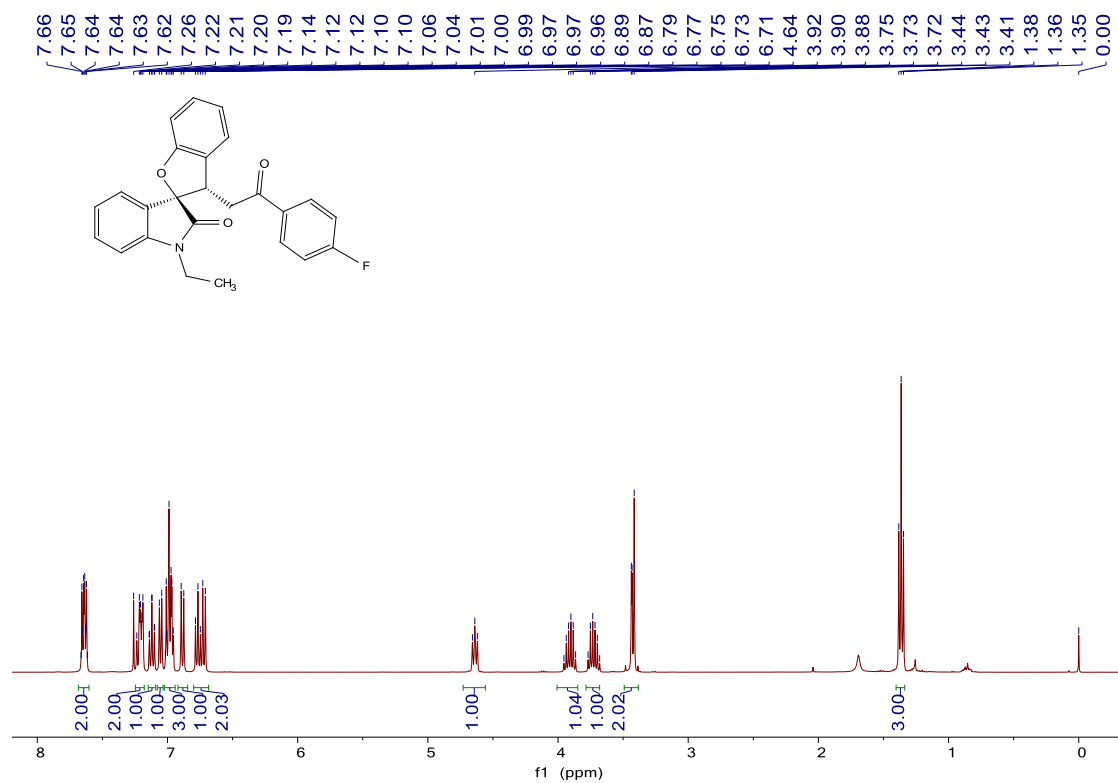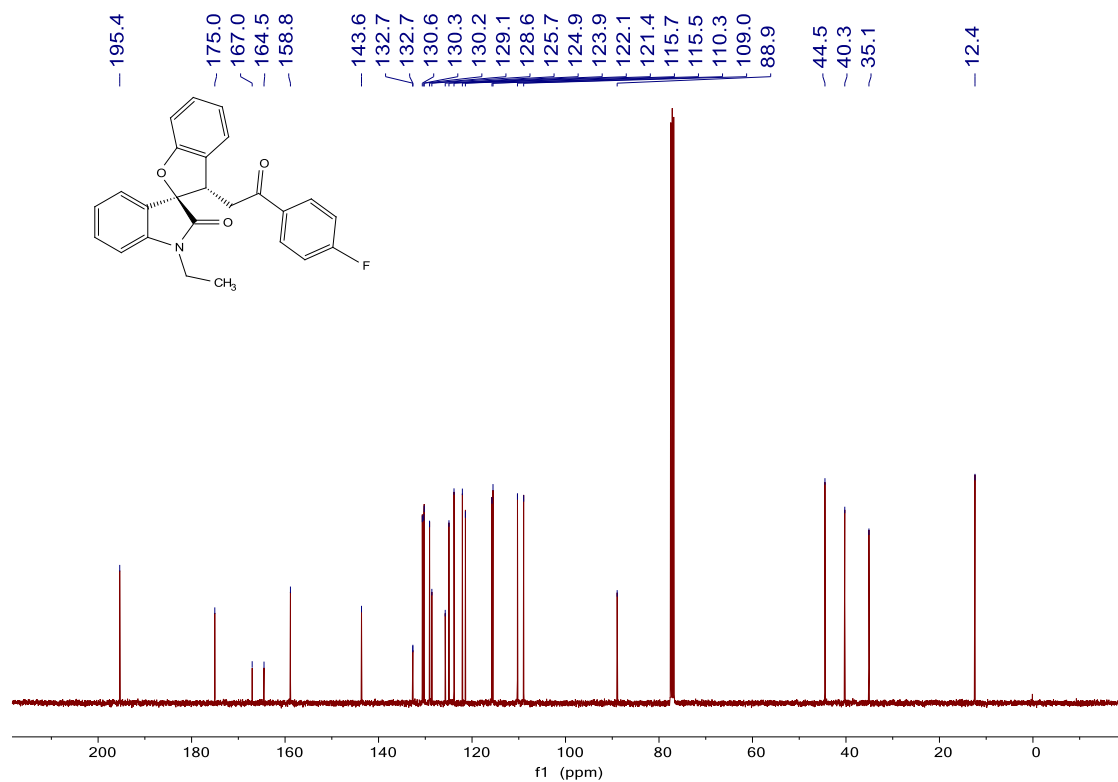

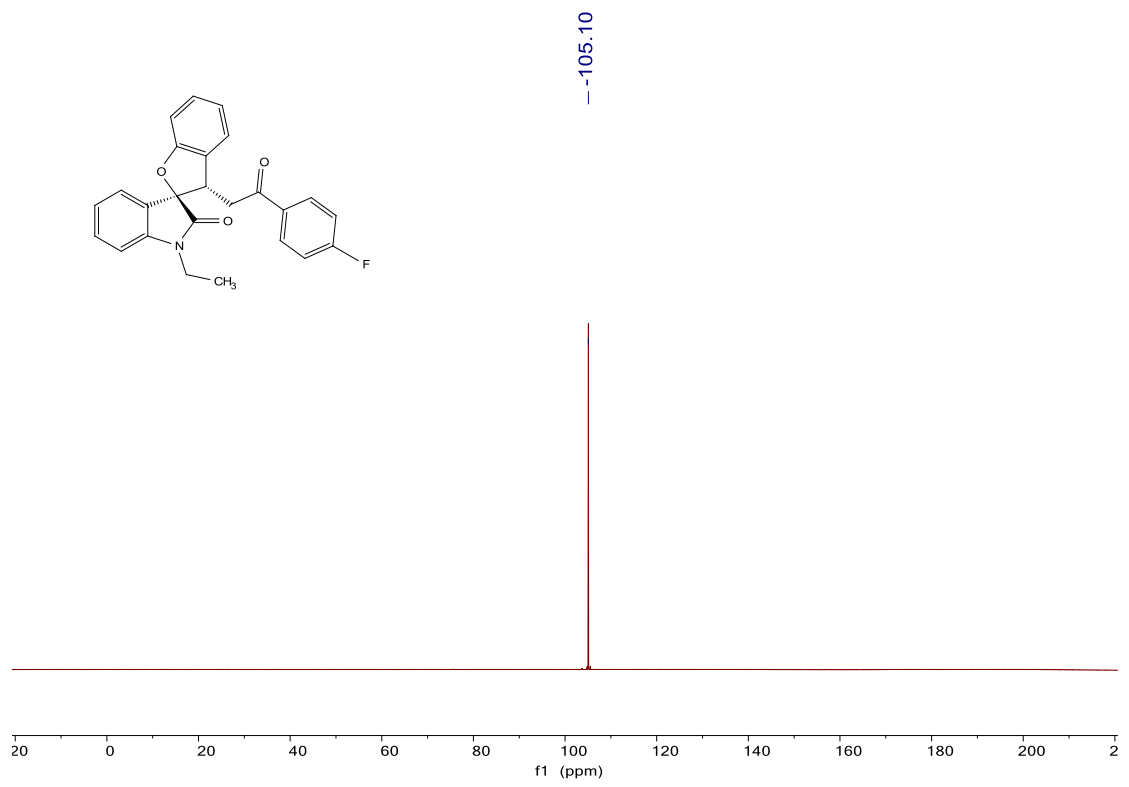

C42

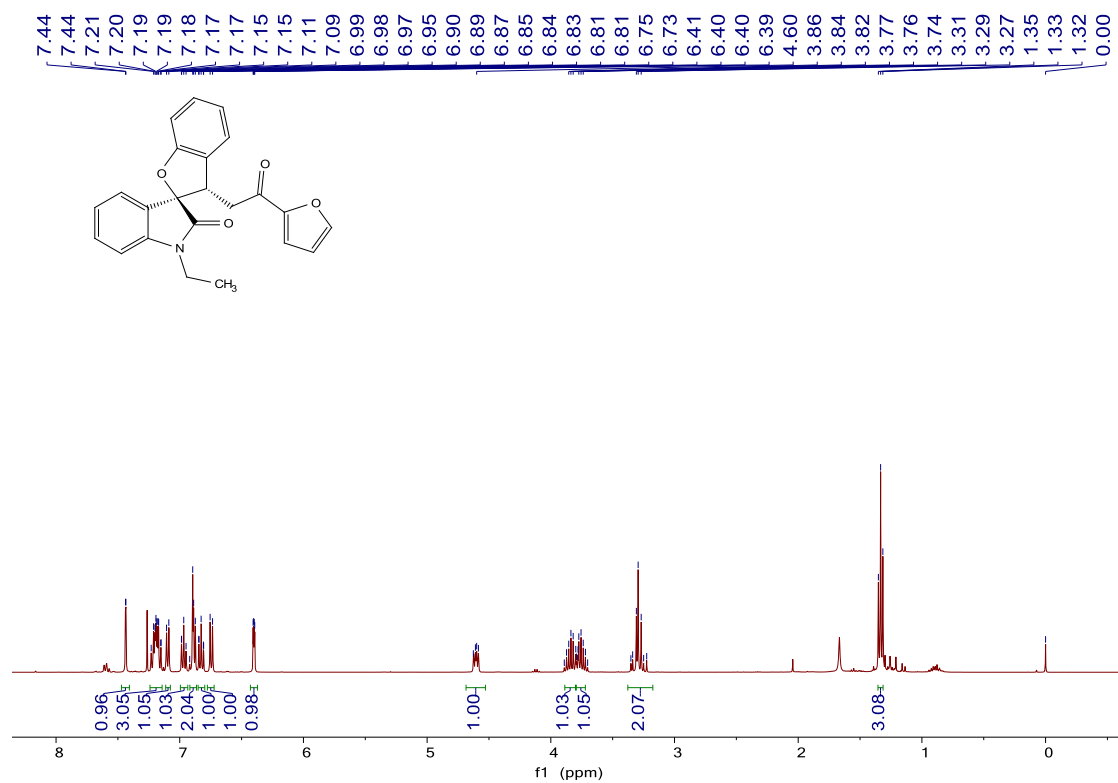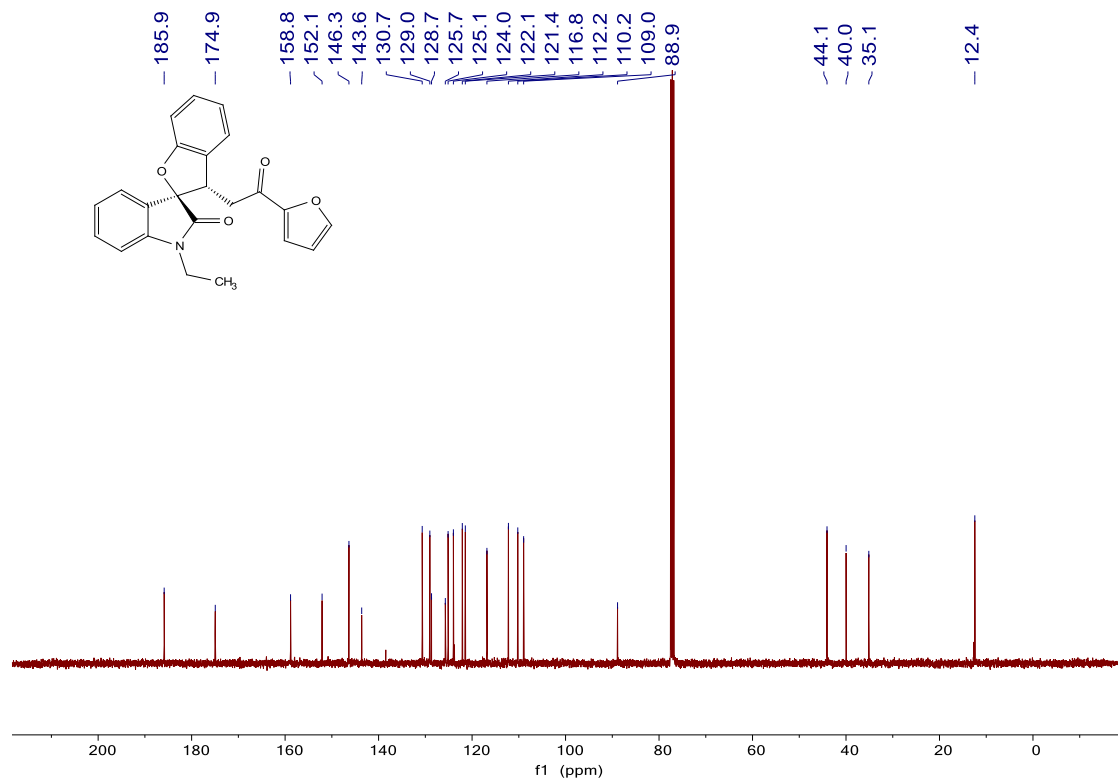

# C43

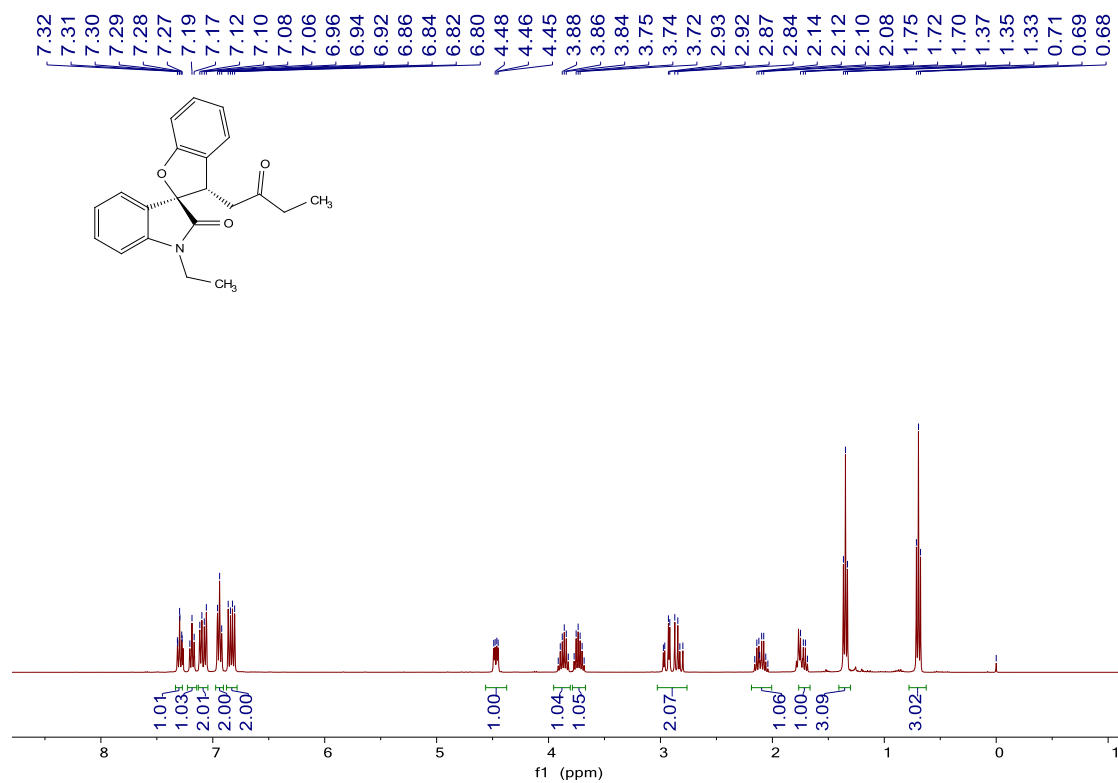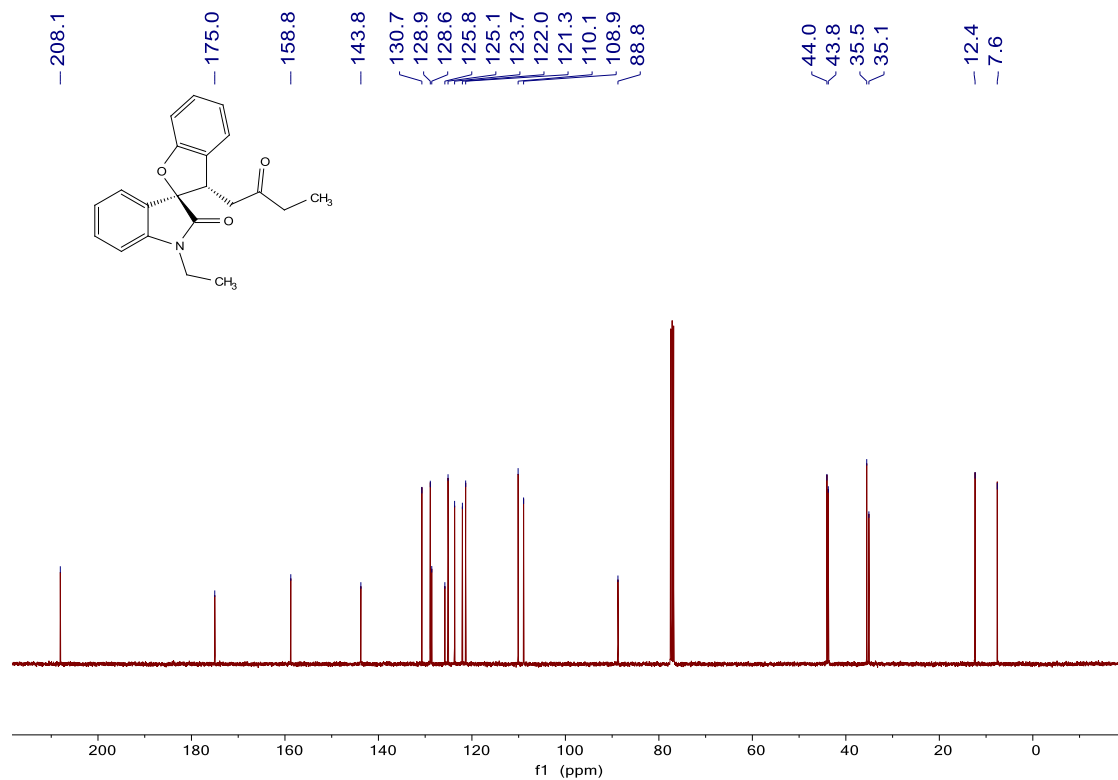



C44

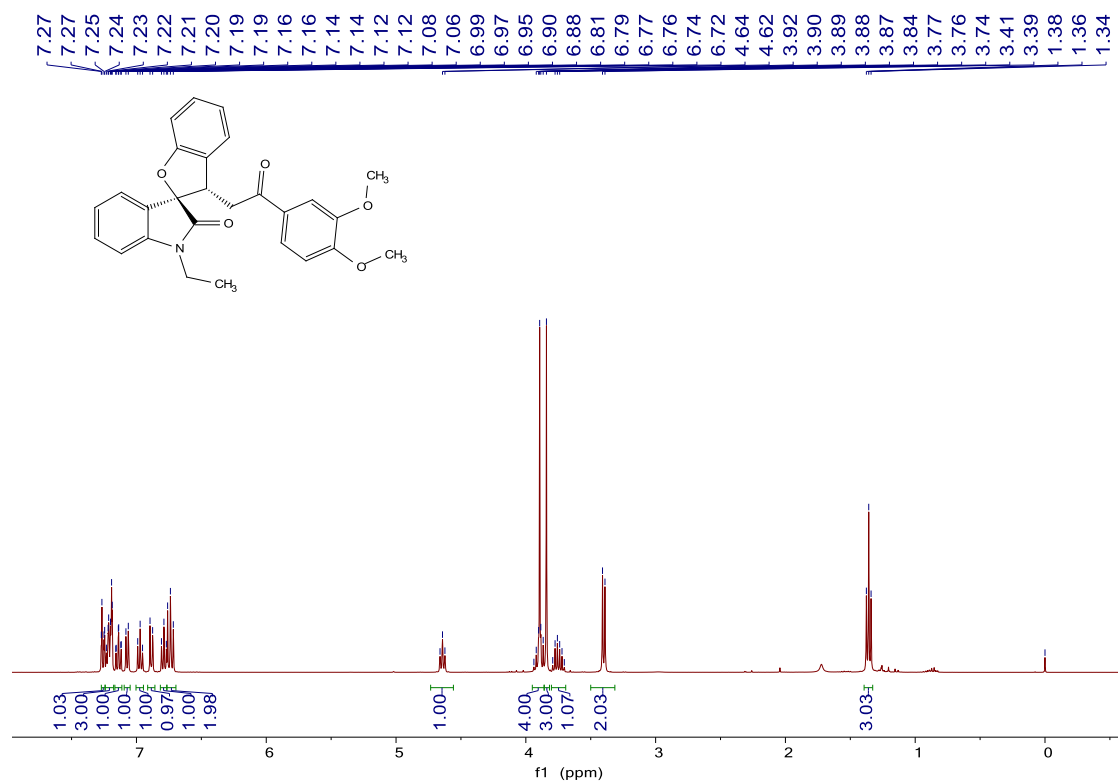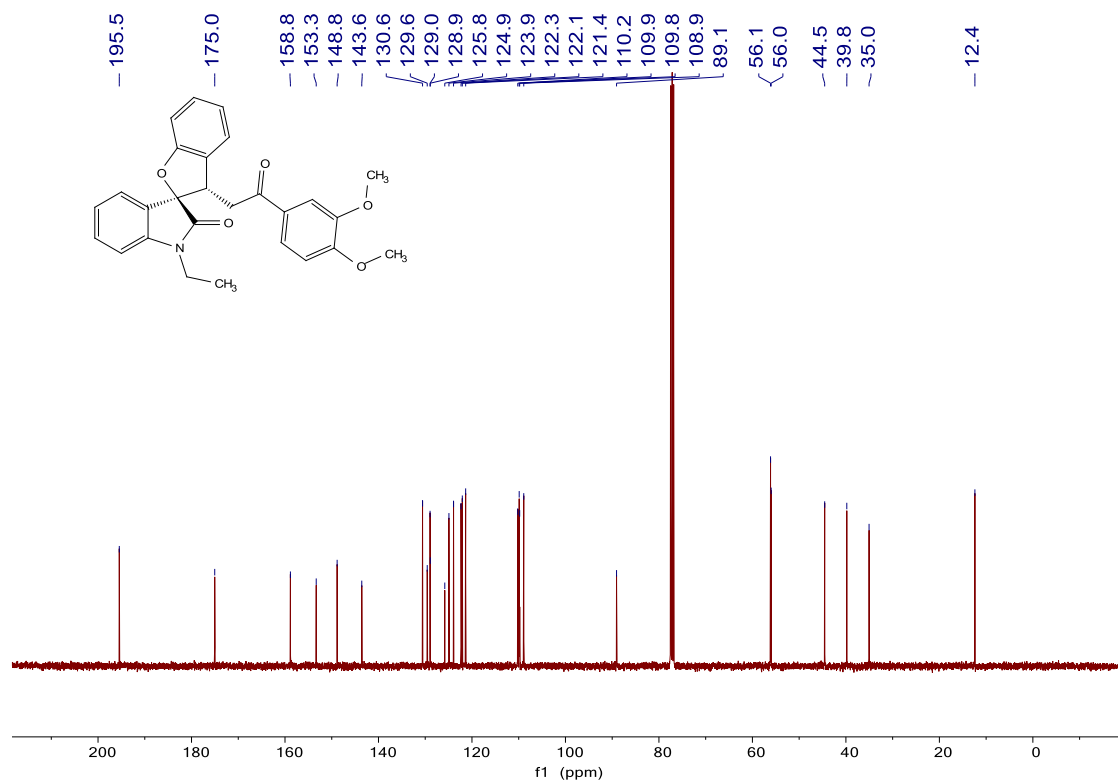

C45

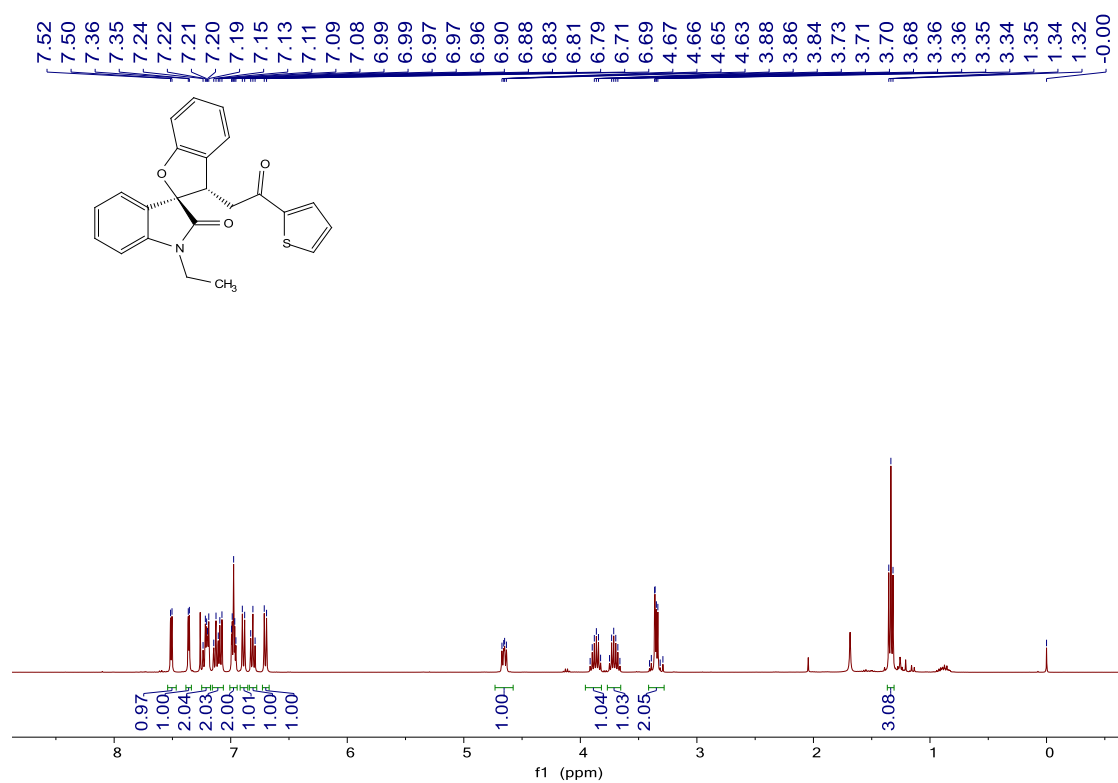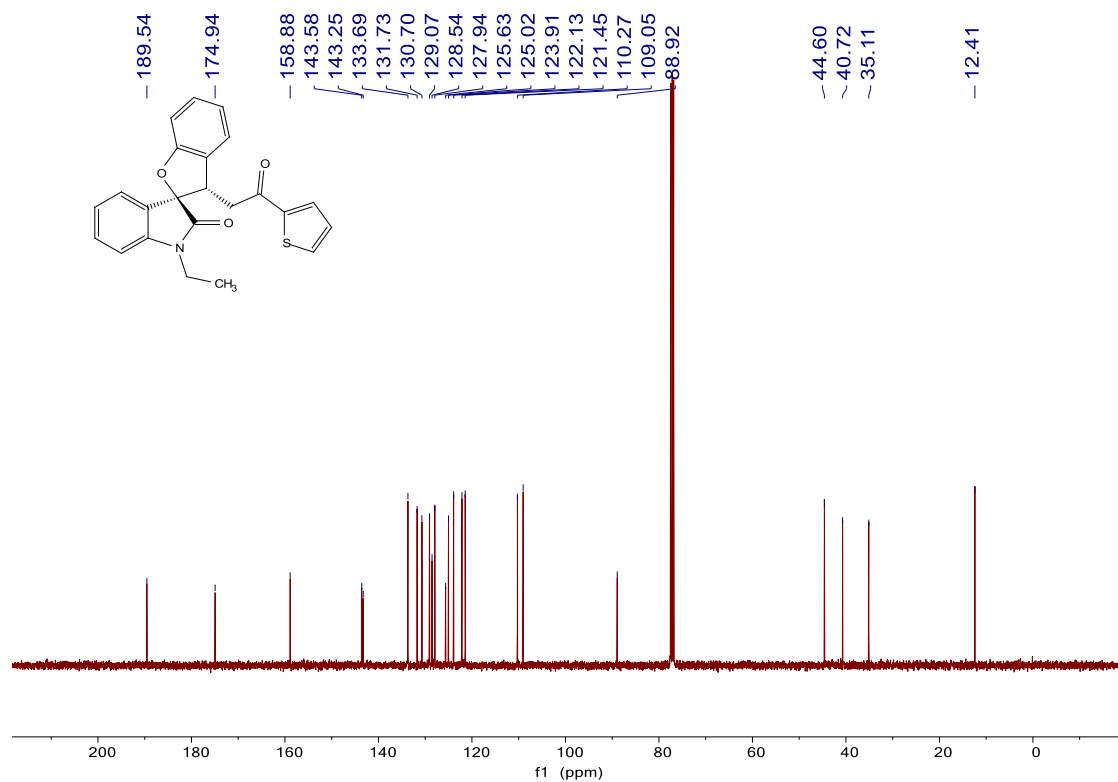

# C46

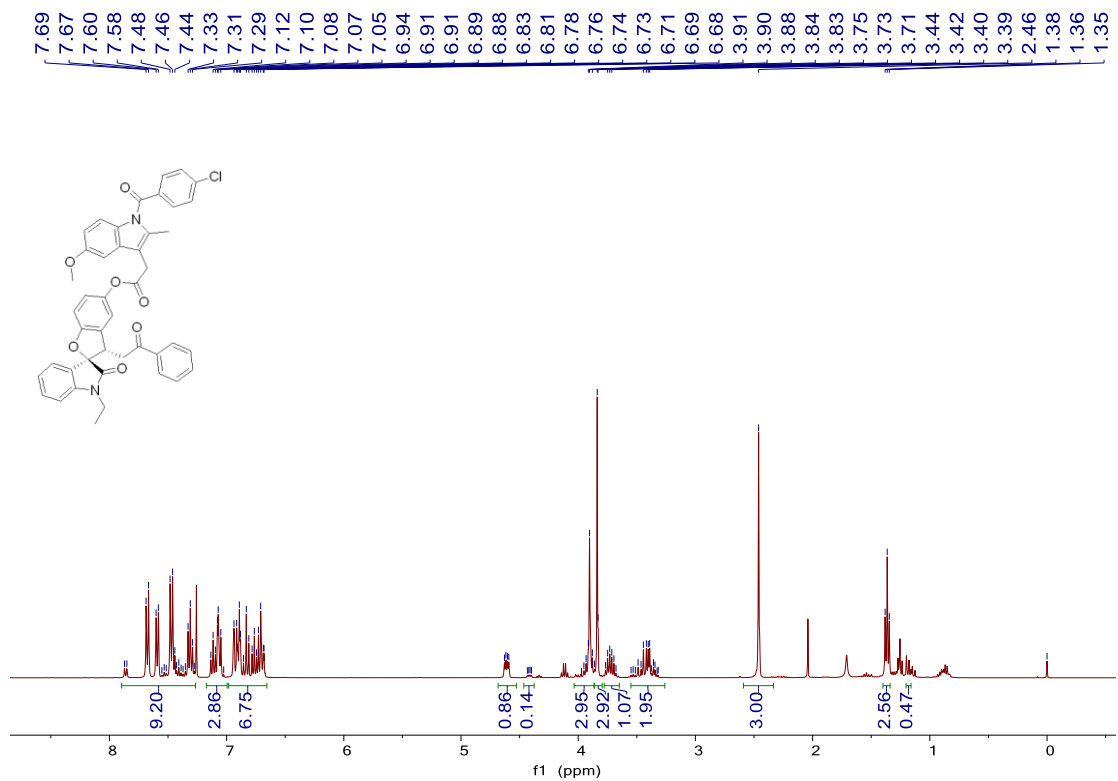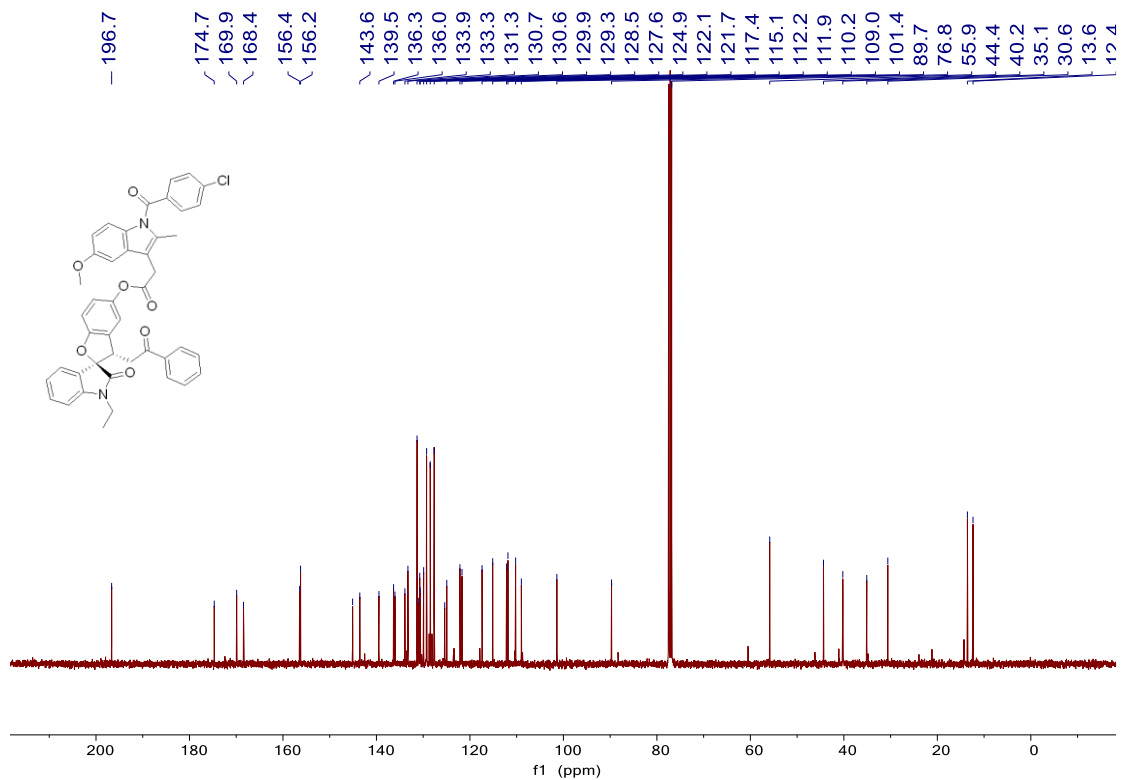

Minor diastereomer of C46

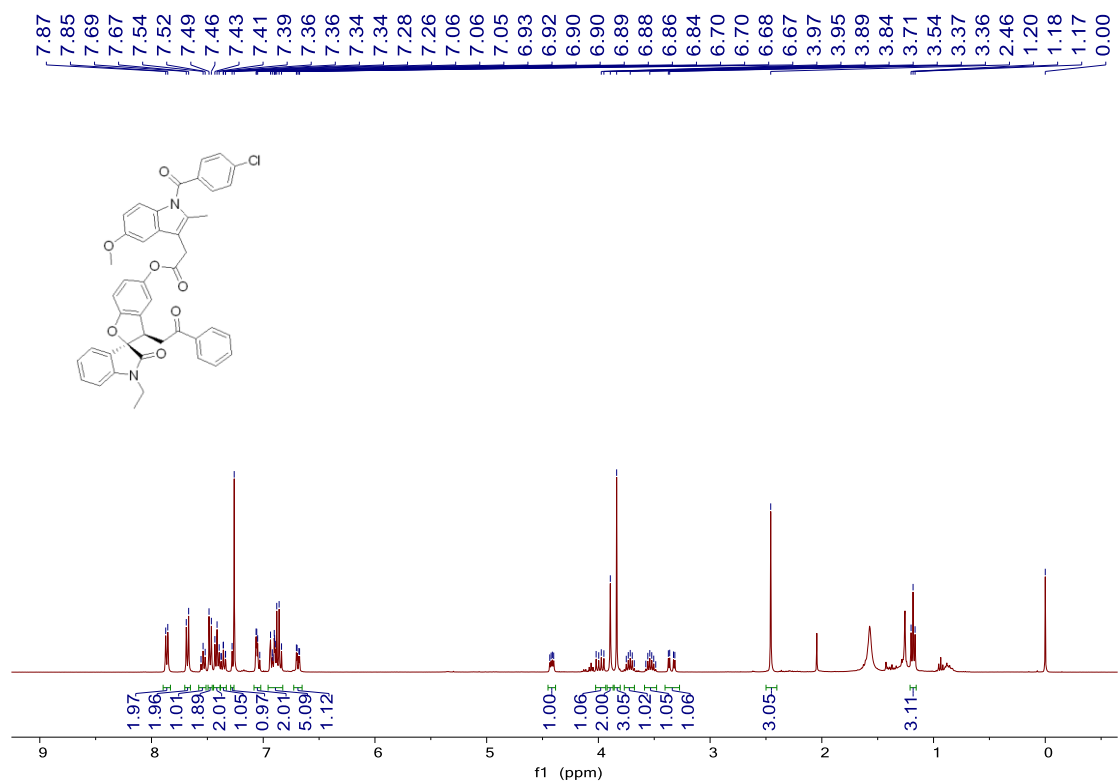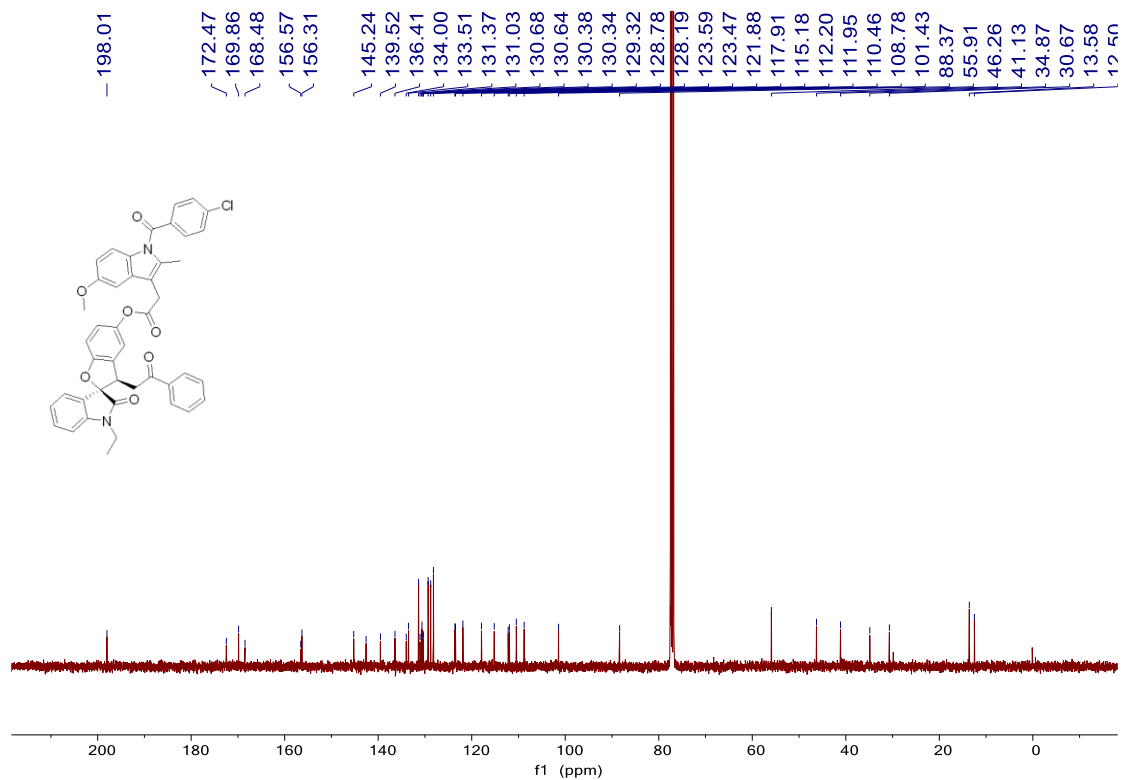

### Major diastereomer of C46

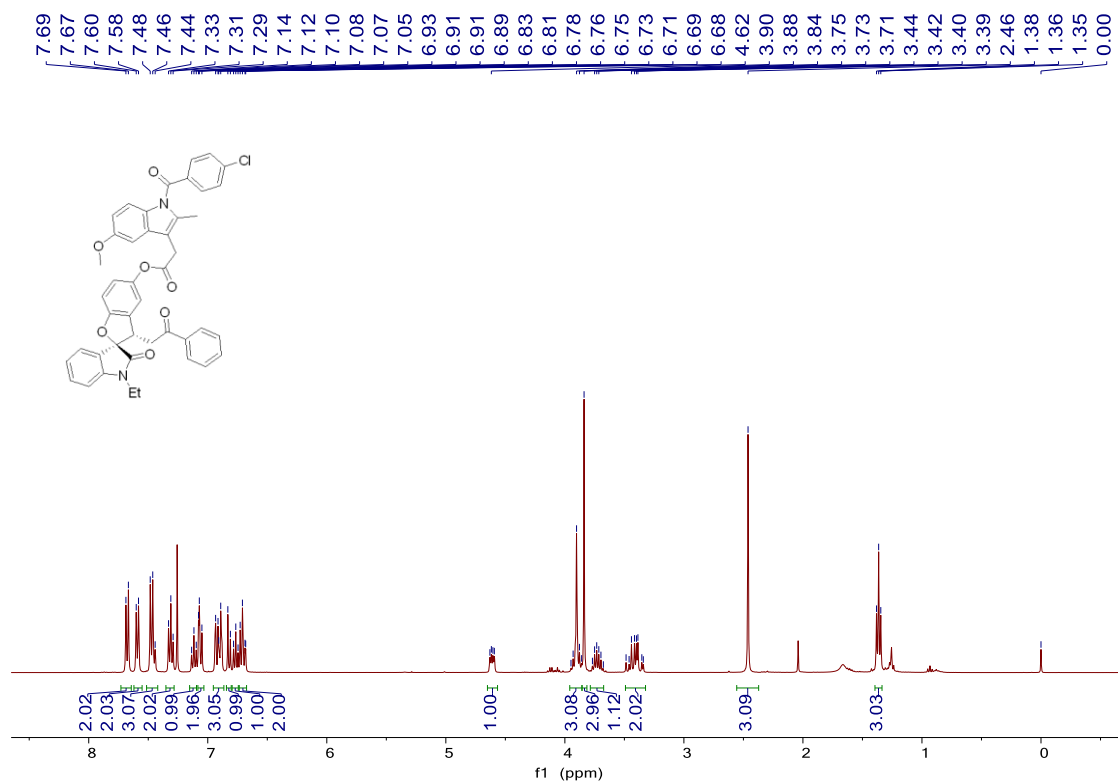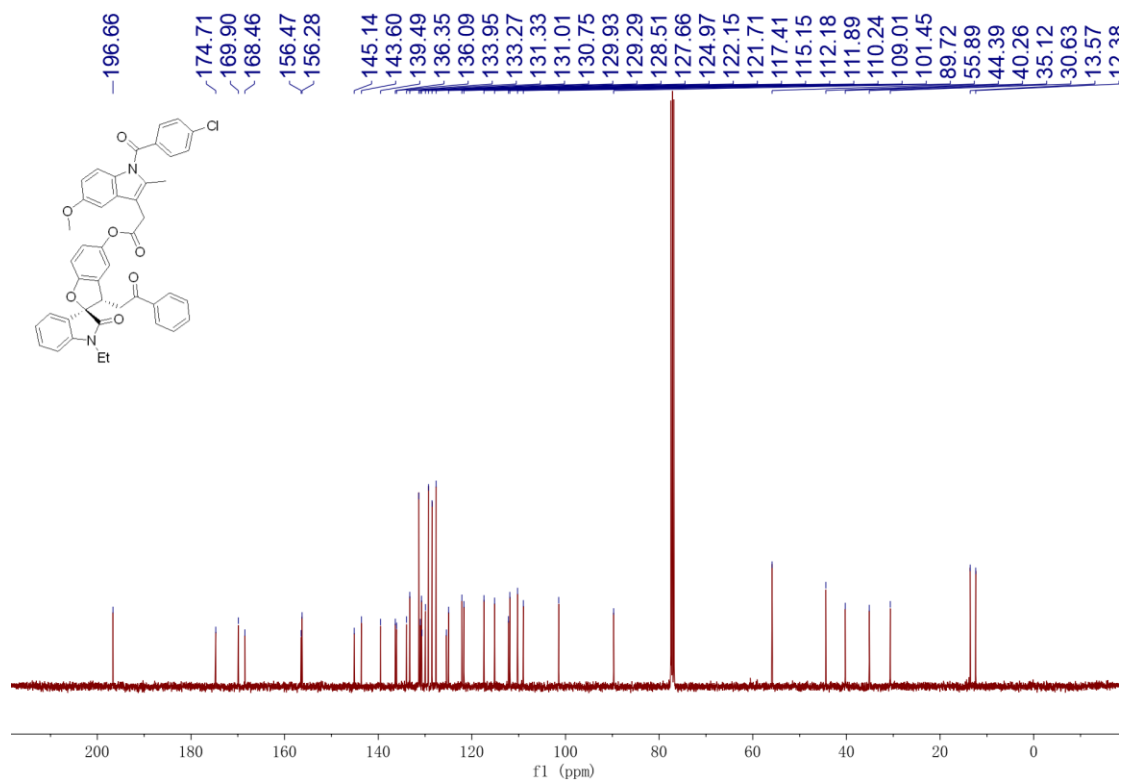

C47

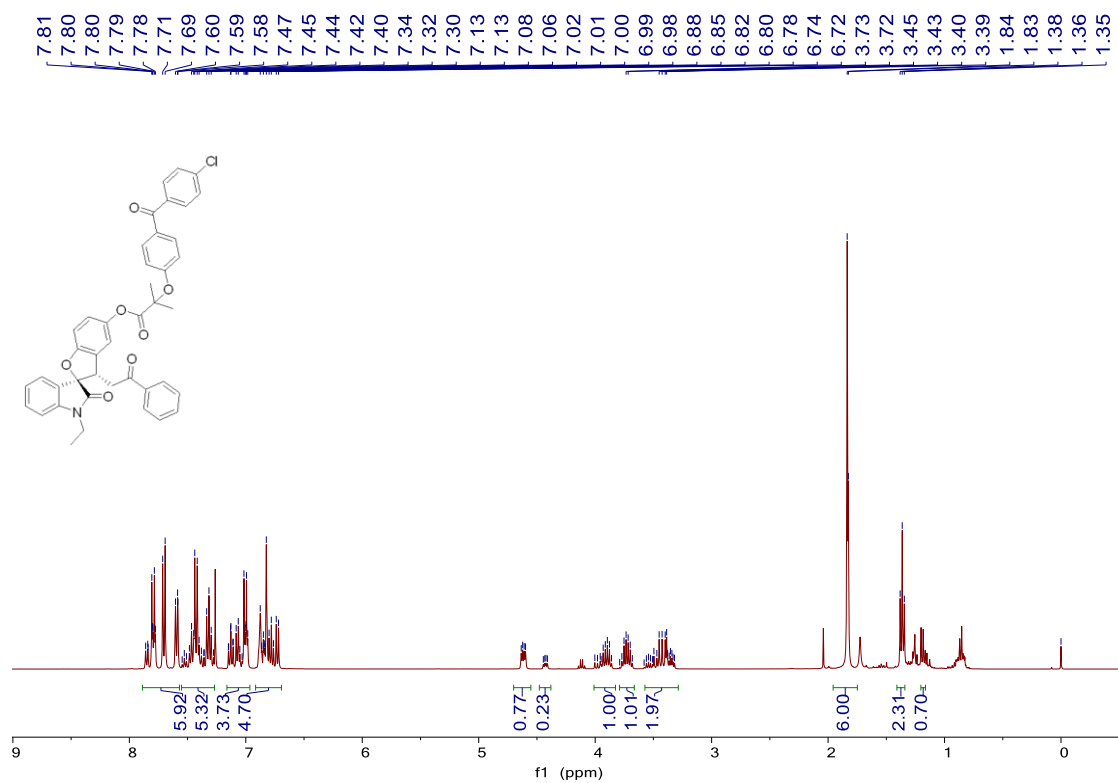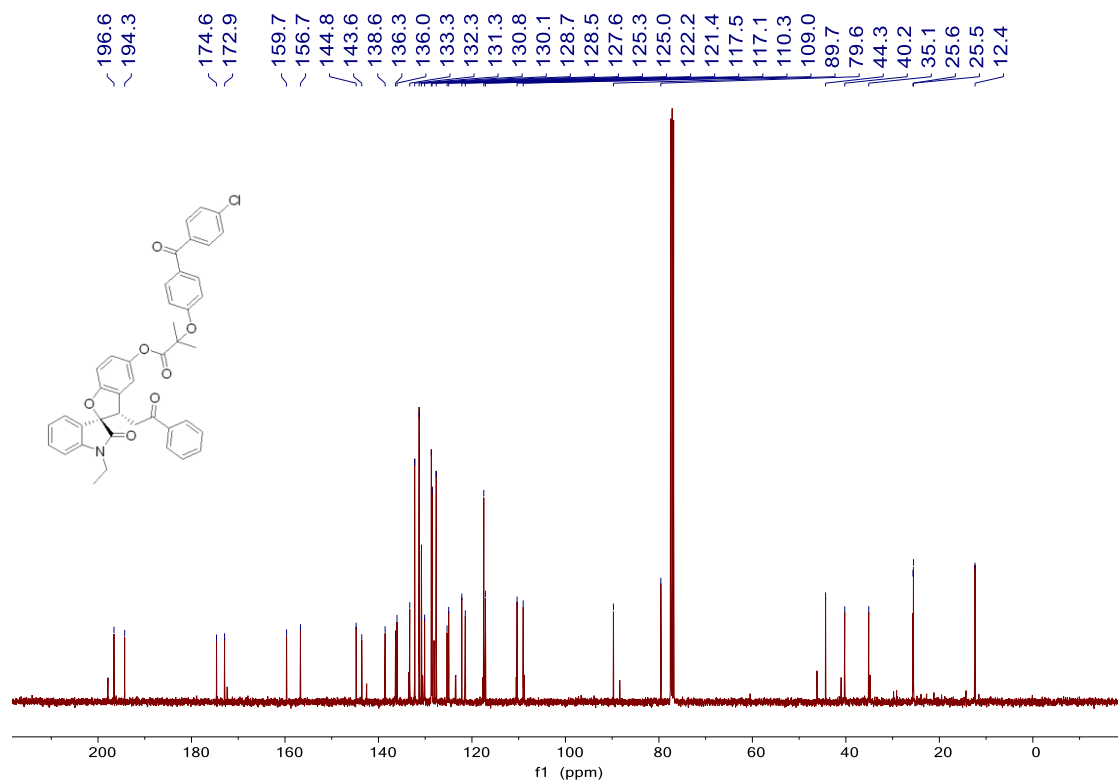

### Minor diastereomer of C47

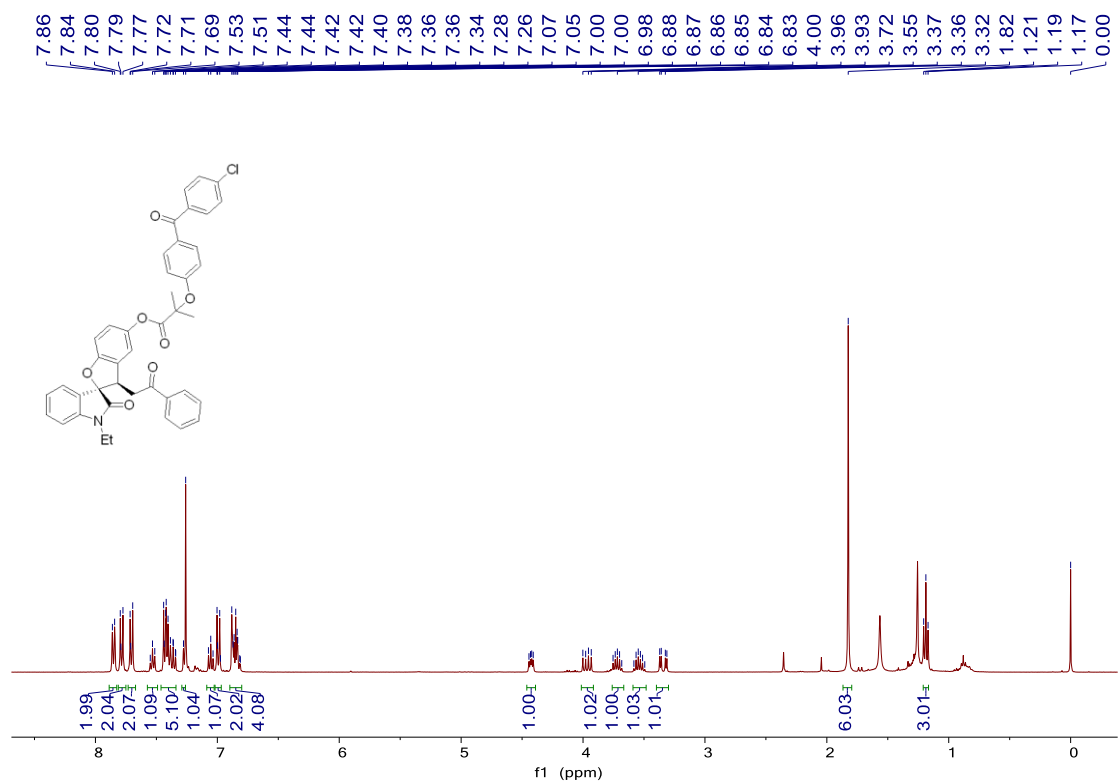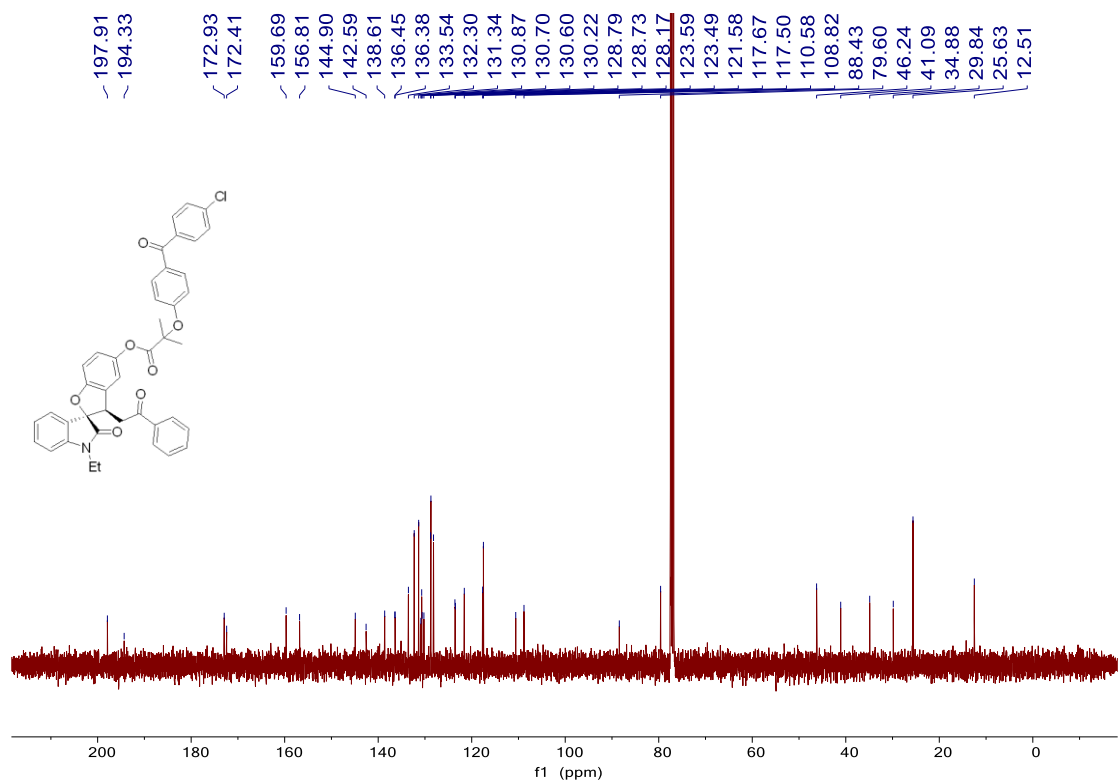

Major diastereomer of C47

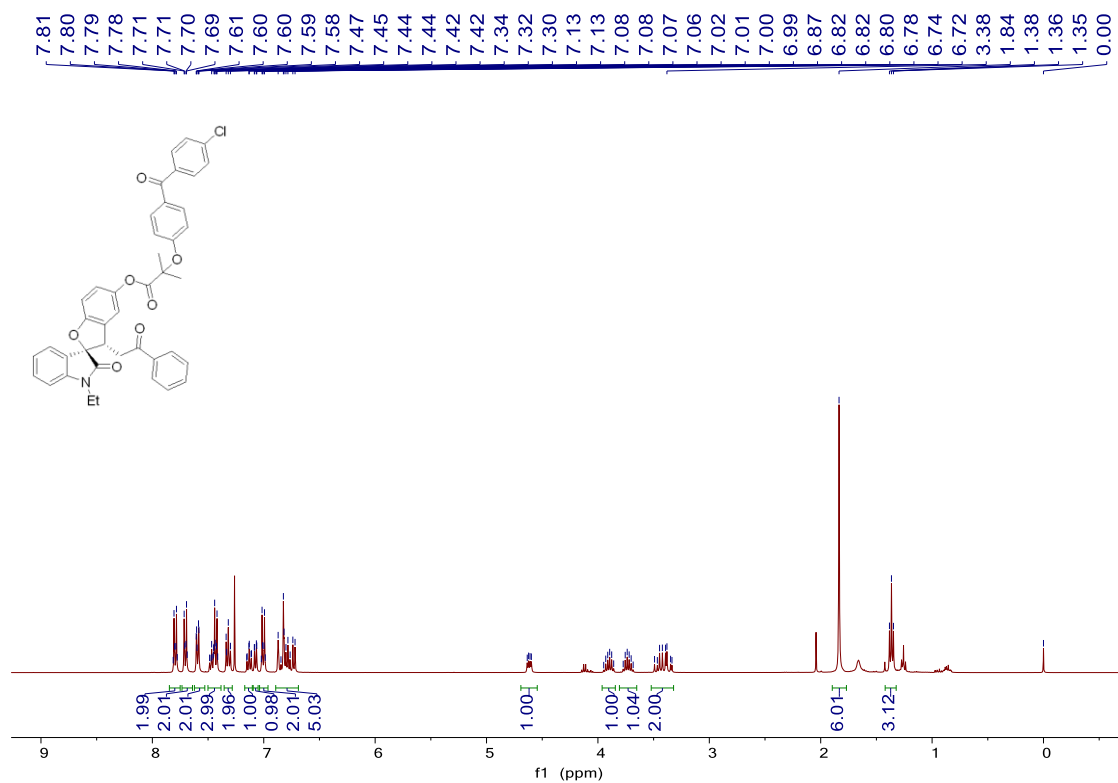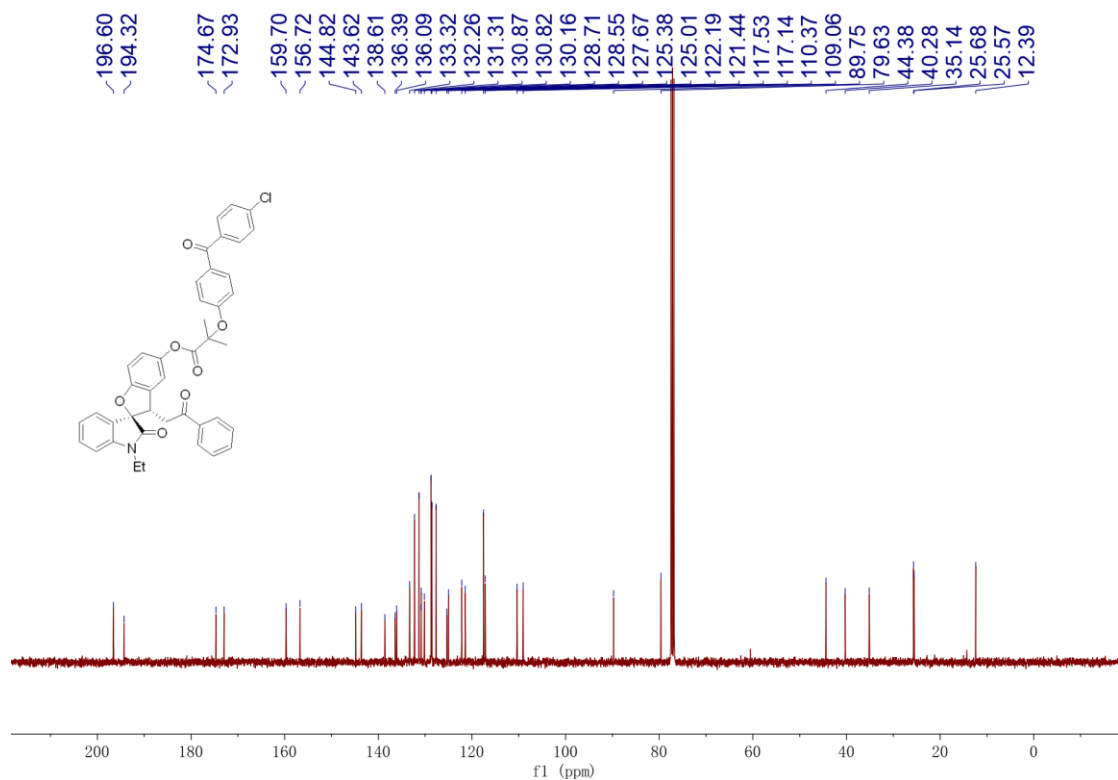



C48

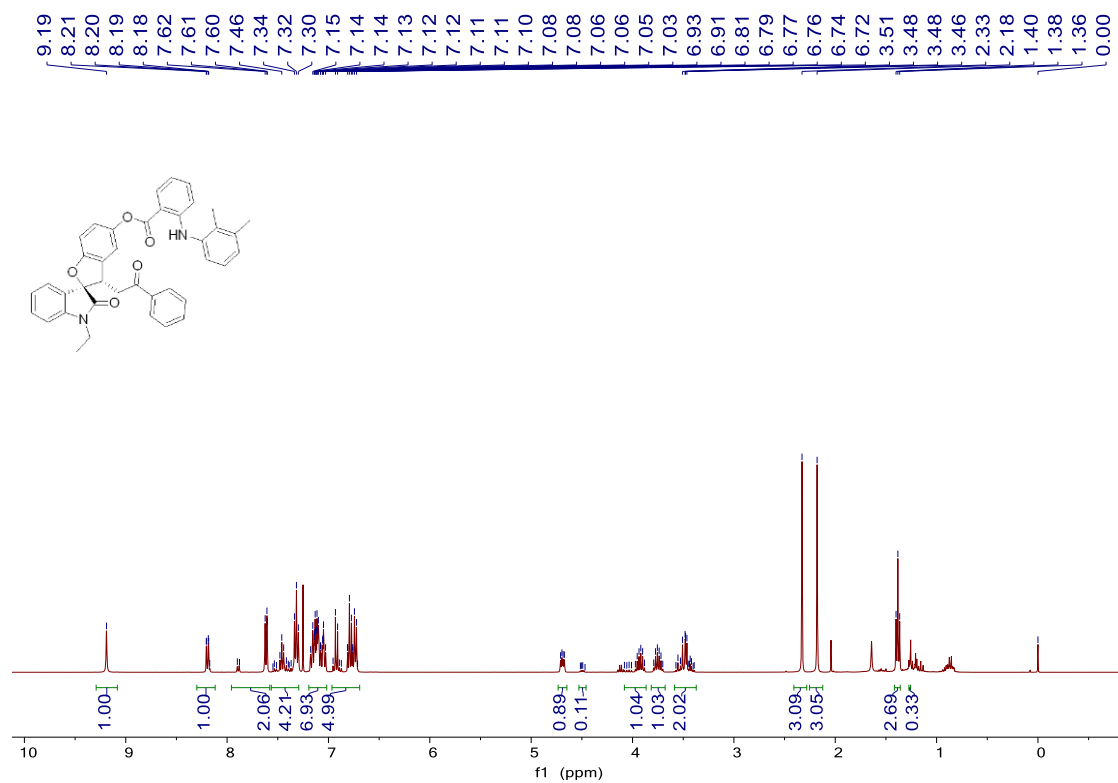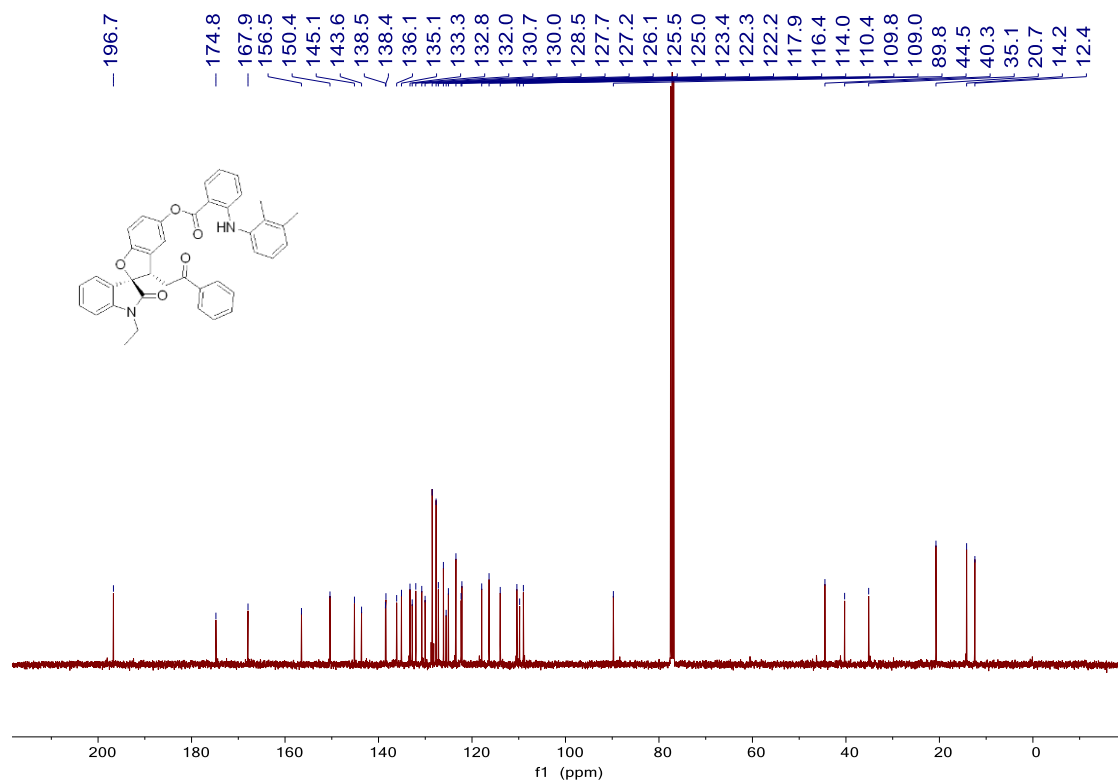

Minor diastereomer of C48

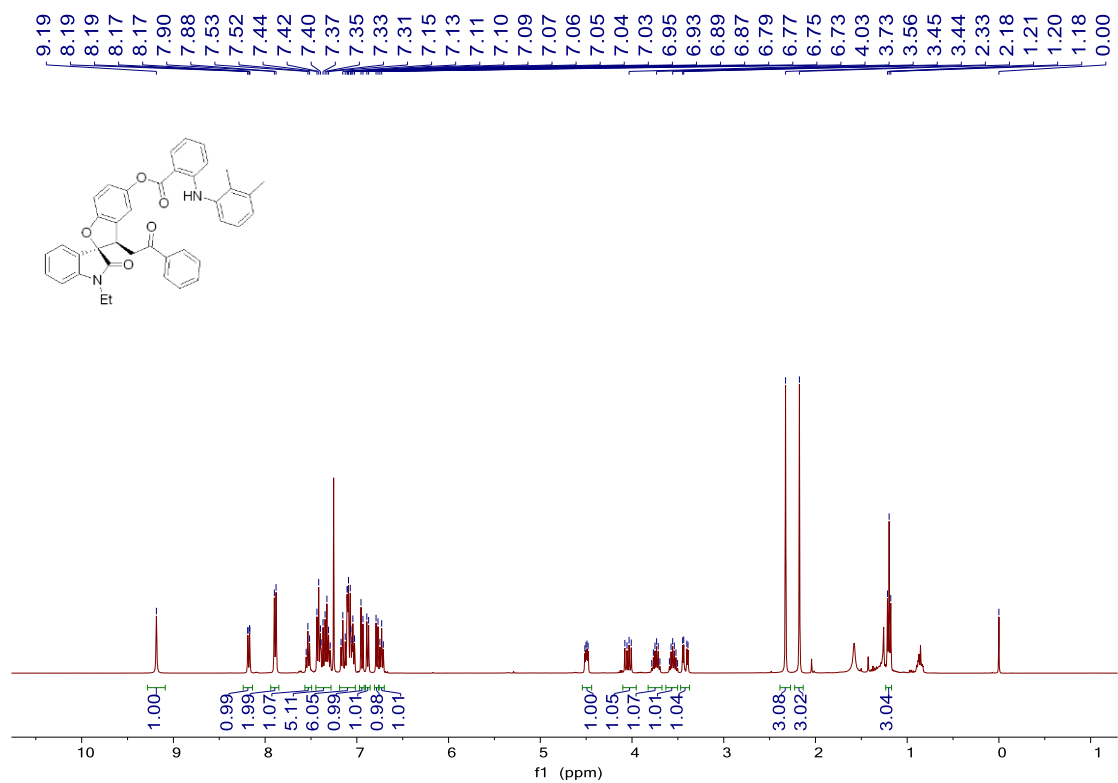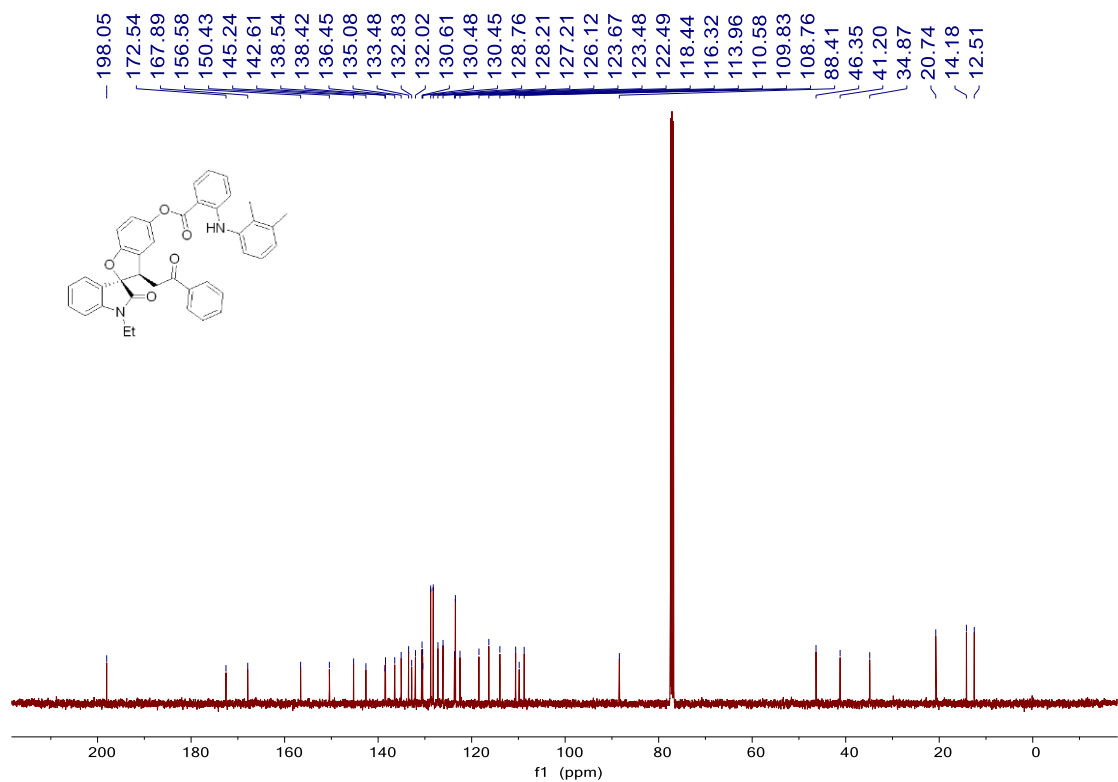

### Major diastereomer of C48

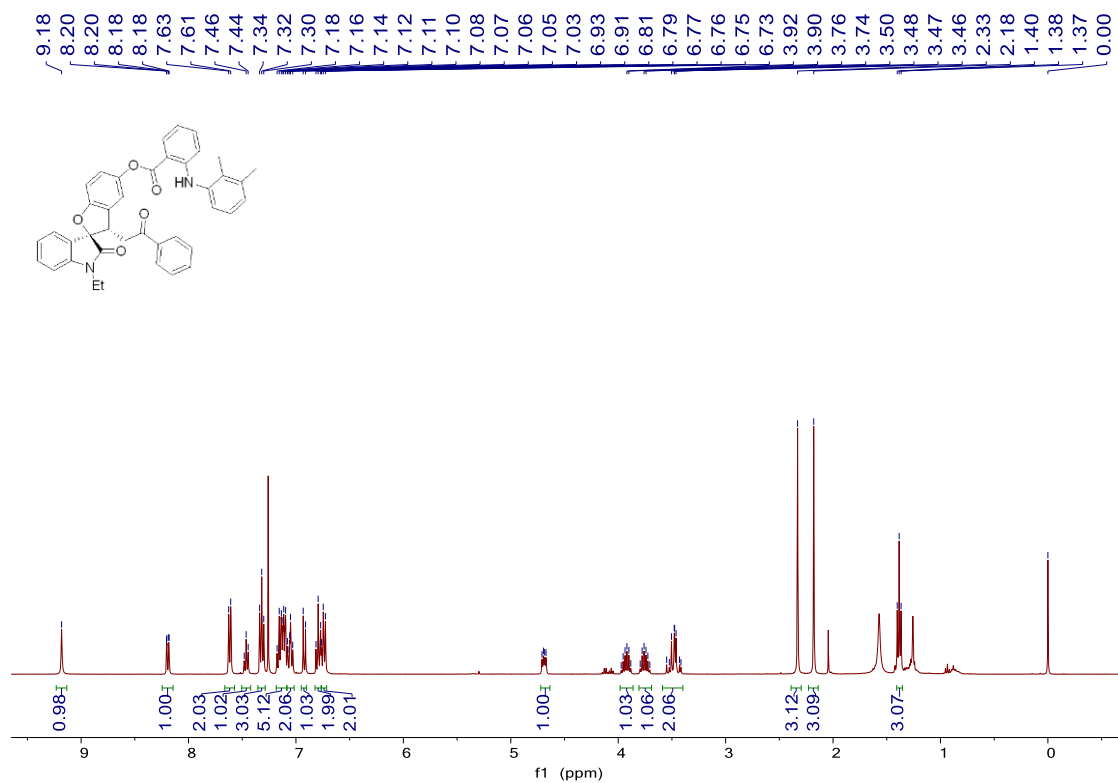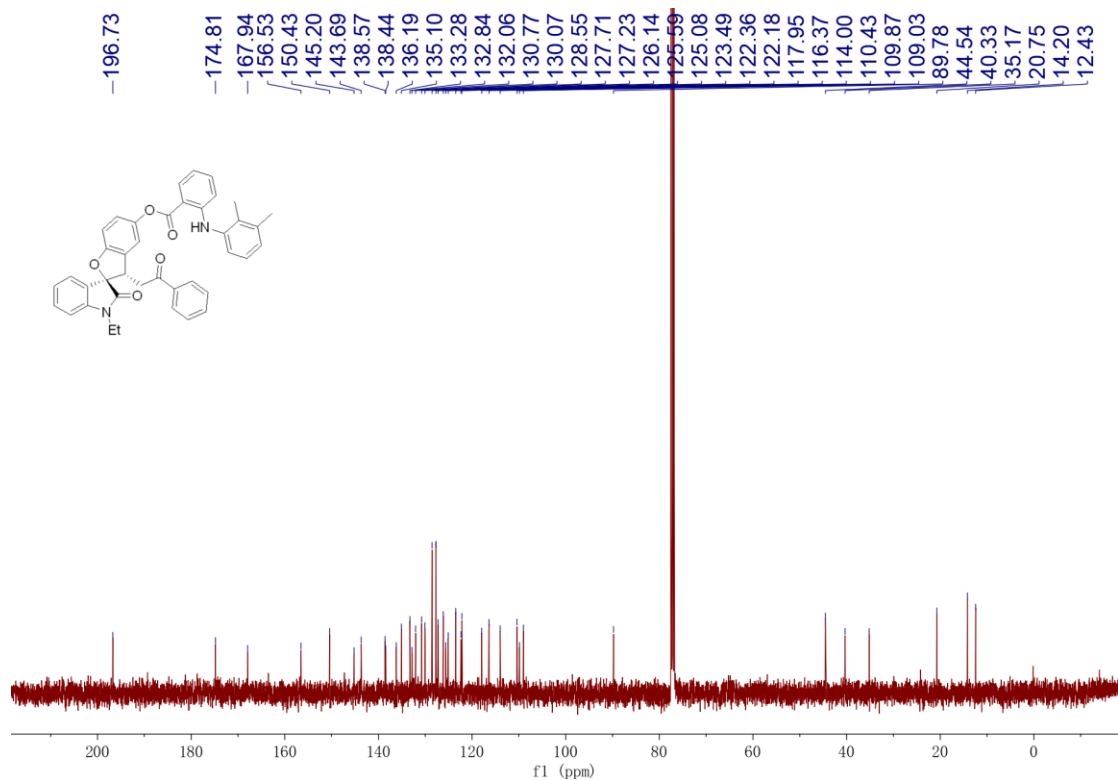

# C49

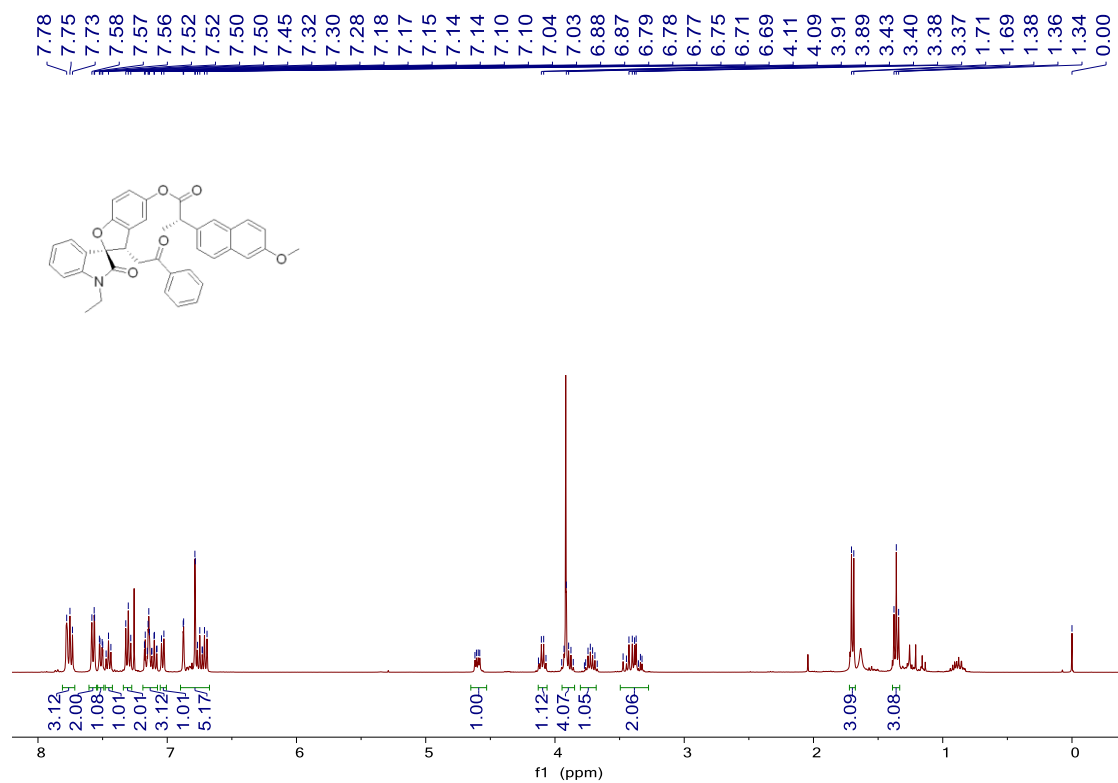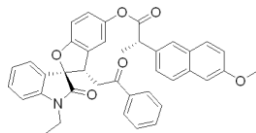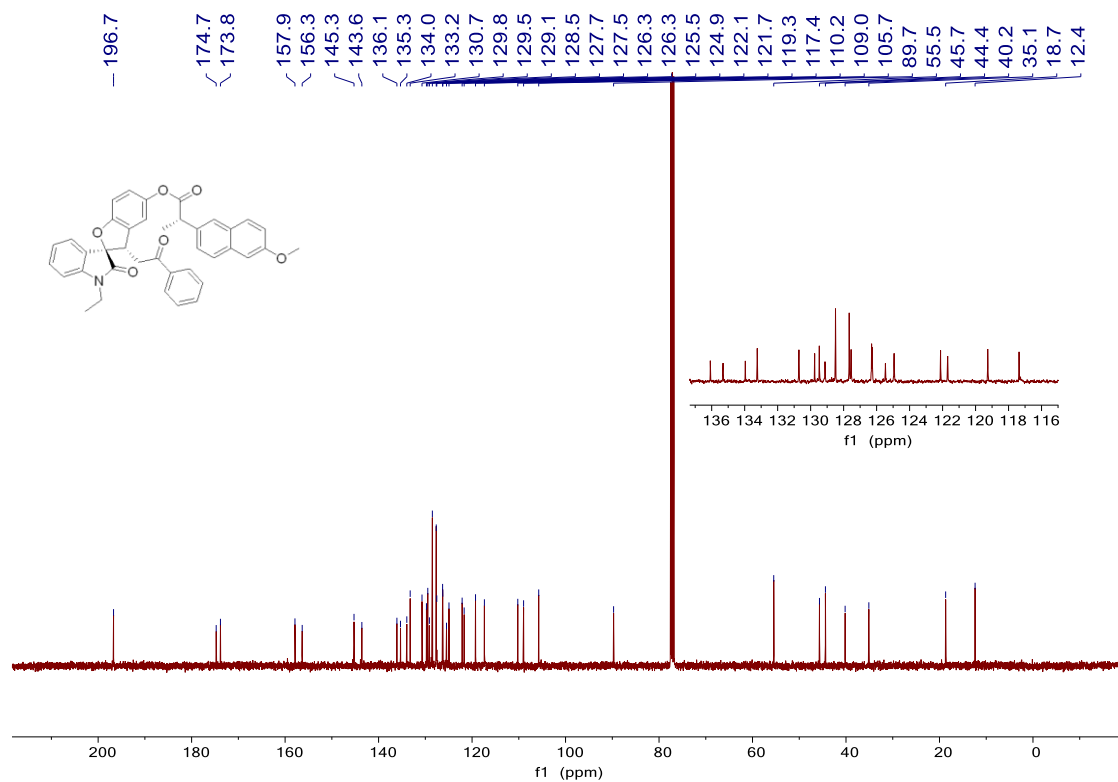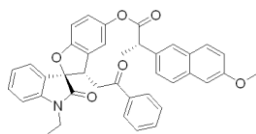

**D1**

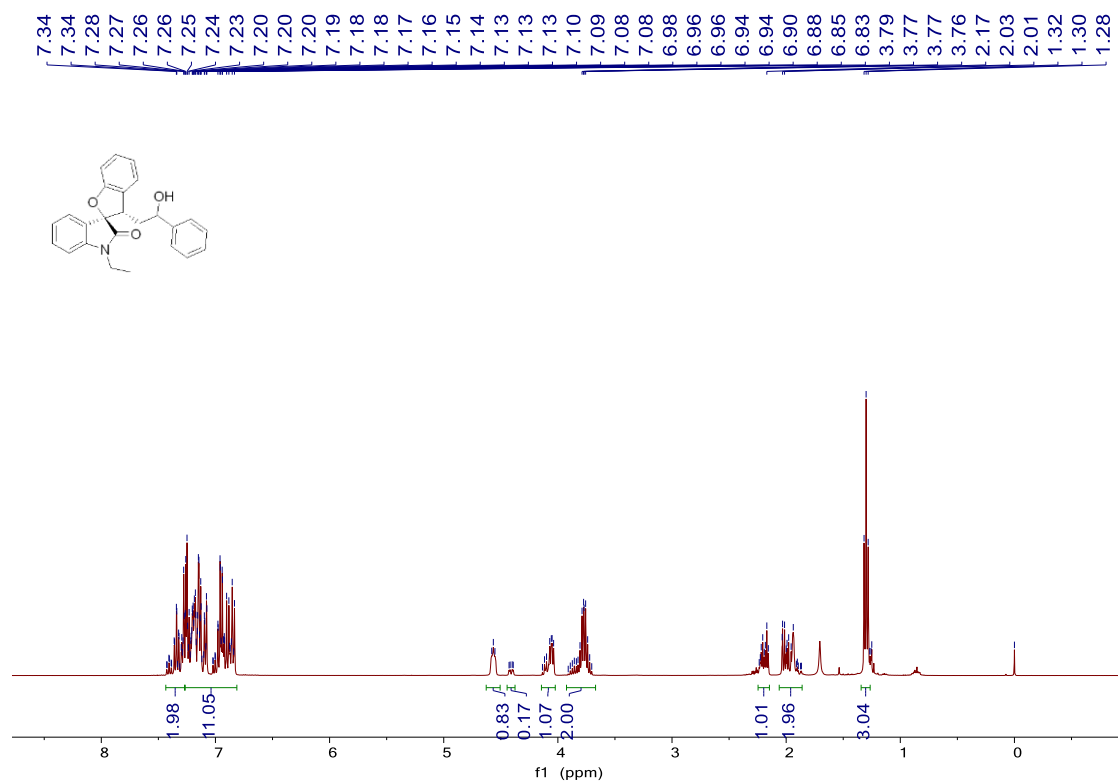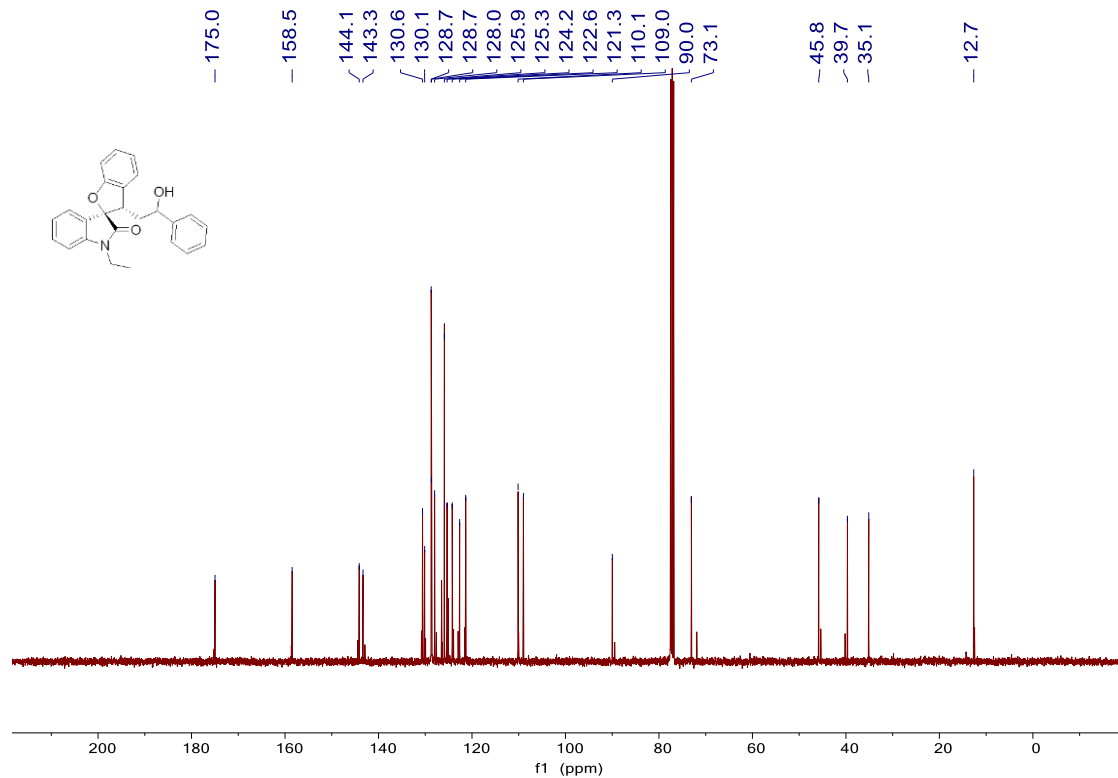

**D2**

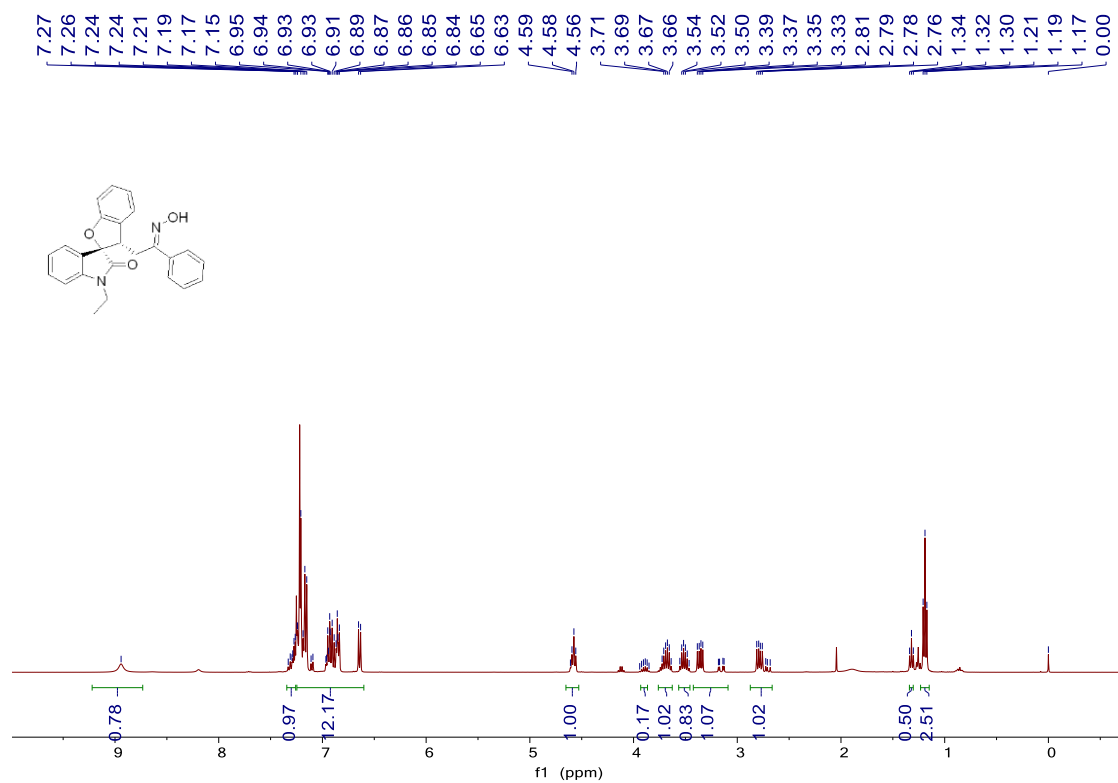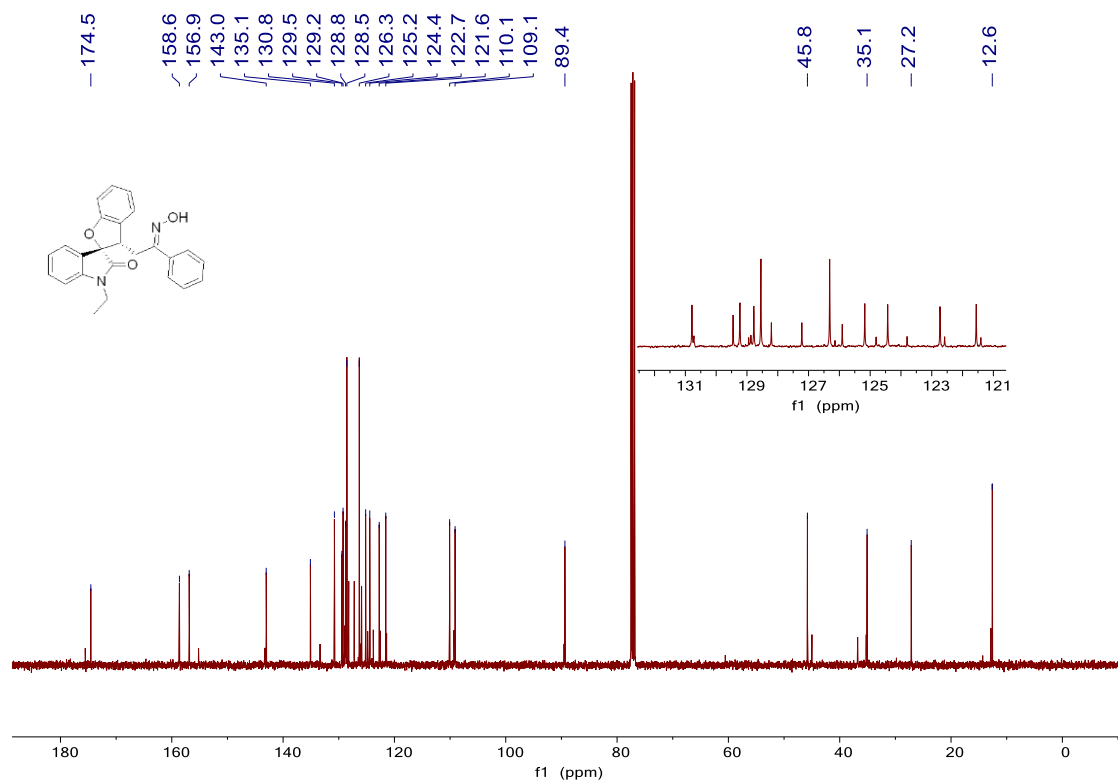

**D3**

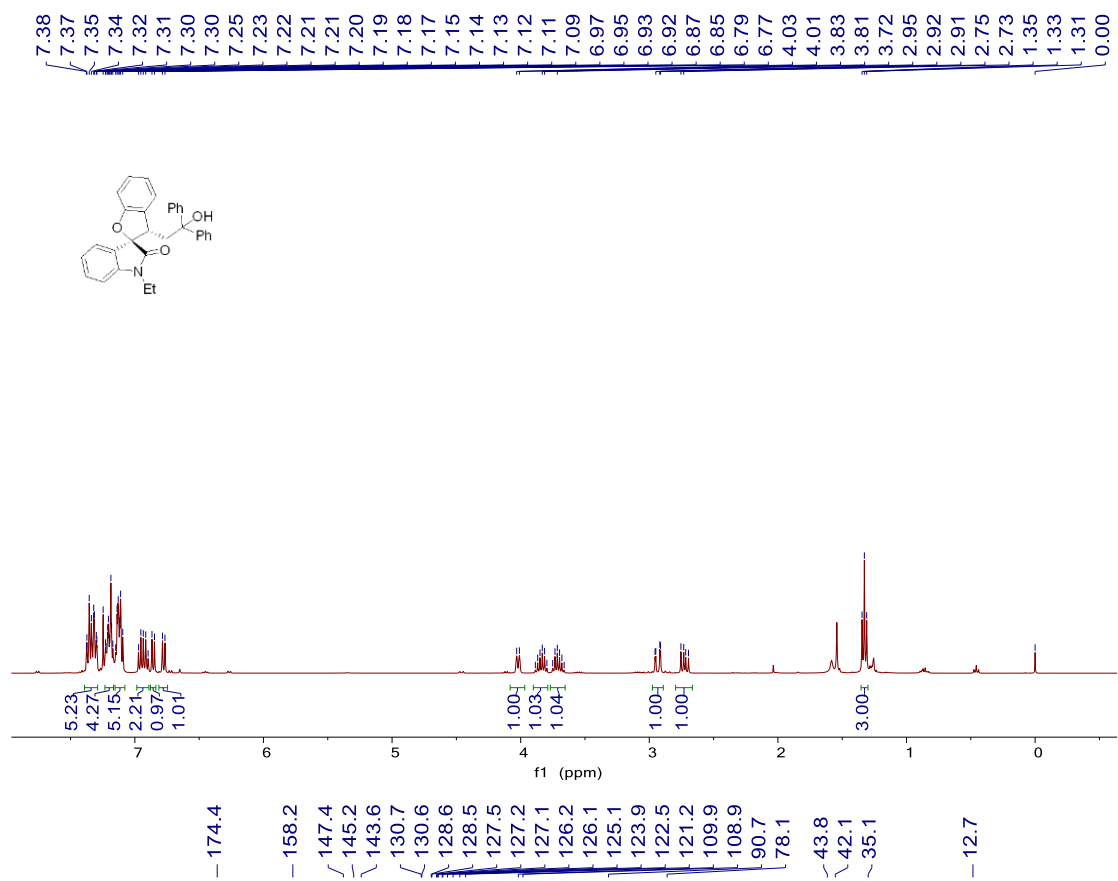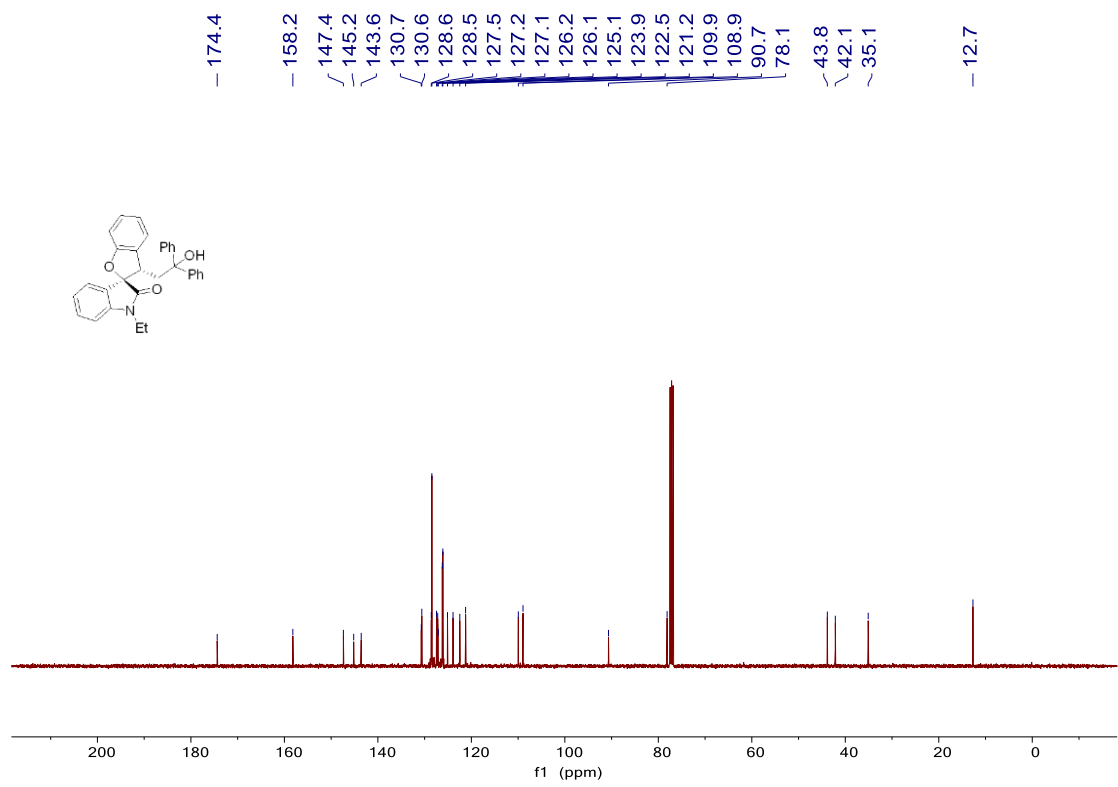

## 10. Reference.

1. Mattia Silvi, Indranil Chatterjee, Yiankai Liu, and Paolo Melchiorre. Controlling the Molecular Topology of Vinylogous Iminium Ions by Logical Substrate Design: Highly Regio- and Stereoselective Aminocatalytic 1,6-Addition to Linear 2,4-Dienals, *Angew. Chem.* 2013, **125**, 10980–10983.
2. (a) Andrew M. Beekman and Russell A. Barrow. Syntheses of the Fungal Metabolites Boletopsins 7, 11, and 12 from the Papua New Guinea Medicinal Mushroom *Boletopsis* sp. *J. Org. Chem.* 2014, **79**, 1017-1024. (b) Shu-Mei Yang, Ganapuram Madhusudhan Reddy, Meng-Hsien Liu, Tzu-Ping Wang, Jhen-Kuei Yu, and Wenwei Lin, Diastereoselective Synthesis of Rauhut–Currier-Type Adducts via an Unexpected  $\alpha$ -Addition of  $\alpha,\beta$ -Unsaturated  $\gamma$ -Butyrolactams to Coumarin Derivatives, *J. Org. Chem.* 2017, **82**, 781–789.
3. Z. P. Yu, X. H. Liu, L. Zhou, L. L. Lin and X. M. Feng, Bifunctional Guanidine via an Amino Amide Skeleton for Asymmetric Michael Reactions of  $\beta$ -Ketoesters with Nitroolefins: A Concise Synthesis of Bicyclic  $\beta$ -Amino Acids, *Angew. Chem. Int. Ed.* 2009, **48**, 5195-5198.
4. S. X. Dong, X. H. Liu, Y. L. Zhang, L. L. Lin and X. M. Feng, Asymmetric Synthesis of 3,4-Diaminochroman-2-ones Promoted by Guanidine and Bisguanidium Salt, *Org. Lett.* 2011, **13**, 5060-5063.
